# Supplementary material for: Bayesian Lasso Regression for Identifying Home and Parental Predictors of Reading Achievement: Evidence from PIRLS 2021 Türkiye
Source: Research Square preprint supplement (doi:10.21203/rs.3.rs-7474211/v1), 2025-09-09
Supplement: Supplementary file 1 [file 60e670cc6850387f4aeff848.xlsx]

## Sheet: Sheet1
IDCNTRY	ITLANG_CQ	ACBG03A	ACBG03B	IDSTUD	ITPARTPT1	ITPARTPT2	ILRELIAB	ITSEX	ITADMINI	ITLANG_SA	ITLANG_SQ	ASBG01	ASDGSLR	ASDG05S	ITLANG_HQ	ASBH12	ASBH13	ASDGHRL	ASDHSES	ASDHPLR	ASDHEDUP	ASDHOCCP	IDTEACH	IDLINK	ITLANG_TQ	ISDUMMY	ATBR16	IDPOP	IDGRADER	IDGRADE	WAVE	IDSCHOOL	IDCLASS	IDTEALIN	IDBOOK	IDSUBJ	NTEACH	TCHWGT	JKREP	JKZONE	ASRREA01	ASRREA02	ASRREA03	ASRREA04	ASRREA05	ASRLIT01	ASRLIT02	ASRLIT03	ASRLIT04
792	35	3	3	50010601			1	2	1	35	35	2	2	3	35	5	5	1	1	1	1	1	500101	1	35	0	4	1	2	4	1	5001	500106	50010101	8	1	1	64.0745	1	29	575.439	557.27	561.953	573.663	567.452	574.185	538.51	552.131	544.303
792	35	3	3	50010602			0	2	1	35	35	2	2	3	35	3	4	2	2	1	2	2	500101	1	35	0	4	1	2	4	1	5001	500106	50010101	18	1	1	64.0745	1	29	624.144	612.684	544.738	503.876	556.777	558.673	490.573	518.708	579.026
792	35	3	3	50010603			0	2	1	35	35	2	1	3	35	3	3	2	1	2	1	1	500101	1	35	0	4	1	2	4	1	5001	500106	50010101	9	1	1	64.0745	1	29	566.978	568.768	532.783	529.967	574.769	510.073	546.943	579.404	573.218
792	35	3	3	50010604			0	2	1	35	35	2	1	3	35	4	3	2	2	1	3	6	500101	1	35	0	4	1	2	4	1	5001	500106	50010101	1	1	1	64.0745	1	29	559.11	606.699	618.604	537.077	578.138	552.785	549.127	549.042	574.225
792	35	3	3	50010605			1	2	1	35	35	2	1	2	35	2	2	2	2	2	2	4	500101	1	35	0	4	1	2	4	1	5001	500106	50010101	2	1	1	64.0745	1	29	569.824	570.488	577.866	581.318	563.877	504.063	561.583	527.241	550.613
792	35	3	3	50010607			0	1	1	35	35	1	2	3	35	3	2	2	2	2	3	3	500101	1	35	0	4	1	2	4	1	5001	500106	50010101	10	1	1	64.0745	1	29	599.03	594.516	535.789	546.127	568.322	630.184	529.702	588.249	630.29
792	35	3	3	50010608			1	1	1	35	35	1	1	3	35	3	3	2	2	1	3	4	500101	1	35	0	4	1	2	4	1	5001	500106	50010101	11	1	1	64.0745	1	29	582.635	625.496	600.358	610.267	534.665	617.638	573.401	641.244	589.431
792	35	3	3	50010609			0	2	1	35	35	2	2	2	35	4	3	2	2	2	3	6	500101	1	35	0	4	1	2	4	1	5001	500106	50010101	12	1	1	64.0745	1	29	528.272	535.762	555.902	494.752	513.849	479.042	539.563	539.222	530.447
792	35	3	3	50010610			1	1	1	35	35	1	1	3	35	5	4	2	2	1	2	4	500101	1	35	0	4	1	2	4	1	5001	500106	50010101	13	1	1	64.0745	1	29	518.128	513.335	527.162	557.563	505.041	509.472	515.462	492.942	525.495
792	35	3	3	50010611			0	2	1	35	35	2	2	3	35	5	5	1	1	3	1	2	500101	1	35	0	4	1	2	4	1	5001	500106	50010101	14	1	1	64.0745	1	29	635.889	716.485	684.809	651.867	762.597	645.453	734.209	649.924	648.501
792	35	3	3	50010613			0	1	1	35	35	1	2	3	35	3	3	2	2	1	2	1	500101	1	35	0	4	1	2	4	1	5001	500106	50010101	16	1	1	64.0745	1	29	554.255	515.23	552.857	545.411	527.189	583.507	505.435	554.972	555.624
792	35	3	3	50010614			1	2	1	35	35	2	1	3	35	4	4	2	1	2	1	3	500101	1	35	0	4	1	2	4	1	5001	500106	50010101	17	1	1	64.0745	1	29	546.389	567.519	581.311	608.607	560.644	607.853	595.209	566.334	595.27
792	35	3	3	50010615			0	2	1	35	35	2	1	3	35	3	5	2	2	1	3	3	500101	1	35	0	4	1	2	4	1	5001	500106	50010101	4	1	1	64.0745	1	29	553.463	558.1	525.916	595.972	588.315	583.137	536.205	590.586	511.527
792	35	3	3	50010616			0	2	1	35	35	2	2	3	35	3	3	2	2	1	2	2	500101	1	35	0	4	1	2	4	1	5001	500106	50010101	18	1	1	64.0745	1	29	515.551	569.666	566.152	633.329	585.585	529.945	585.31	545.813	610.129
792	35	3	3	50010617			0	2	1	35	35	2	1	3	35	1	2	2	3	1	4	2	500101	1	35	0	4	1	2	4	1	5001	500106	50010101	5	1	1	64.0745	1	29	512.235	524.021	510.964	489.975	529.381	504.426	560.012	538.47	530.018
792	35	3	3	50010618			0	1	1	35	35	1	2	2	35	3	4	2	2	2	3	4	500101	1	35	0	4	1	2	4	1	5001	500106	50010101	10	1	1	64.0745	1	29	615.511	639.094	590.329	562.607	526.454	673.733	532.897	593.316	467.423
792	35	3	3	50010619			0	1	1	35	35	1	1	2	35	3	2	2	3	1	5	3	500101	1	35	0	4	1	2	4	1	5001	500106	50010101	11	1	1	64.0745	1	29	481.294	478.336	477.949	474.578	472.114	477.369	423.106	474.059	470.538
792	35	3	3	50010620			0	1	1	35	35	1	1	2	35	4	4	2	2	2	3	3	500101	1	35	0	4	1	2	4	1	5001	500106	50010101	6	1	1	64.0745	1	29	544.74	554.449	502.561	580.615	529.209	614.24	569.164	592.051	596.289
792	35	3	3	50010621			1	2	1	35	35	2	1	3	35	5	5	1	1	1	1	1	500101	1	35	0	4	1	2	4	1	5001	500106	50010101	7	1	1	64.0745	1	29	563.832	602.357	544.7	599.889	583.219	569.164	578.209	614.339	595.215
792	35	3	3	50010622			0	1	1	35	35	1	1	3	35	2	1	2	3	2	3	3	500101	1	35	0	4	1	2	4	1	5001	500106	50010101	8	1	1	64.0745	1	29	553.793	560.062	547.39	565.653	525.818	515.104	550.354	501.258	492.294
792	35	3	3	50010623			0	1	1	35	35	1	2	3	35	3	3	2	2	2	2	1	500101	1	35	0	4	1	2	4	1	5001	500106	50010101	9	1	1	64.0745	1	29	614.148	620.702	617.735	670.398	663.487	708.348	692.987	618.778	700.904
792	35	3	3	50010624			0	1	1	35	35	1	1	3	35	4	4	1	1	3	1	1	500101	1	35	0	4	1	2	4	1	5001	500106	50010101	1	1	1	64.0745	1	29	679.873	695.28	614.53	648.98	688.616	656.206	649.974	630.451	631.11
792	35	3	3	50010625			0	1	1	35	35	1	1	3	35	3	3	2	2	1	3	4	500101	1	35	0	4	1	2	4	1	5001	500106	50010101	2	1	1	64.0745	1	29	617.952	617.708	572.597	591.578	609.643	634.664	626.063	607.424	636.327
792	35	3	3	50010626			0	1	1	35	35	1	1	3	35	3	2	2	2	2	3	2	500101	1	35	0	4	1	2	4	1	5001	500106	50010101	3	1	1	64.0745	1	29	520.563	499.536	455.169	478.732	491.814	525.018	465.19	445.748	467.459
792	35	3	3	50010627			0	1	1	35	35	1	1	2	35	5	4	1	1	1	1	1	500101	1	35	0	4	1	2	4	1	5001	500106	50010101	12	1	1	64.0745	1	29	550.932	513.135	637.326	553.476	631.583	641.903	576.926	577.101	645.907
792	35	3	3	50010630			1	2	1	35	35	2	2	3	35	3	2	2	3	2	5	5	500101	1	35	0	4	1	2	4	1	5001	500106	50010101	5	1	1	64.0745	1	29	606.352	601.031	543.756	596.183	589.622	611.803	550.523	591.191	633.338
792	35	3	3	50010631			0	2	1	35	35	2	1	3	35	4	4	2	1	2	1	3	500101	1	35	0	4	1	2	4	1	5001	500106	50010101	13	1	1	64.0745	1	29	532.035	544.153	529.874	517.287	546.657	473.892	493.255	500.201	523.572
792	35	3	3	50010633			1	2	1	35	35	2	1	2	35	4	3	2	2	2	1	3	500101	1	35	0	4	1	2	4	1	5001	500106	50010101	14	1	1	64.0745	1	29	522.358	513.341	576.664	511.036	535.496	513.616	539.859	473.078	499.899
792	35	3	3	50010634			0	1	1	35	35	1	1	3	35	2	5	1	1	1	1	1	500101	1	35	0	4	1	2	4	1	5001	500106	50010101	15	1	1	64.0745	1	29	605.243	698.694	651.935	635.732	527.859	681.635	695.389	649.825	580.525
792	35	3	3	50010635			0	1	1	35	35	1	2	3	35	4	5	1	1	2	1	5	500101	1	35	0	4	1	2	4	1	5001	500106	50010101	7	1	1	64.0745	1	29	519.543	490.031	557.392	512.28	507.062	534.742	497.578	525.87	481.983
792	35	3	3	50010636			0	2	1	35	35	2	2	3	35	4	4	2	2	1	3	3	500101	1	35	0	4	1	2	4	1	5001	500106	50010101	8	1	1	64.0745	1	29	577.082	607.112	592.254	559.261	620.475	565.555	627.207	581.749	588.643
792	35	3	3	50011401			0	2	1	35	35	2	1	3	35	4	3	2	2	1	5	5	500102	2	35	0	3	1	2	4	1	5001	500114	50010202	7	1	1	60.1912	1	29	560.552	612.165	551.057	532.832	605.503	566.494	591.354	580.101	611.274
792	35	3	3	50011402			0	1	1	35	35	1	1	2	35	4	5	2	1	2	3	1	500102	2	35	0	3	1	2	4	1	5001	500114	50010202	8	1	1	60.1912	1	29	605.049	659.961	599.891	585.453	590.169	609.694	590.259	595.464	643.355
792	35	3	3	50011403			0	2	1	35	35	2	2	2	35	1	1	2	3	2	3	6	500102	2	35	0	3	1	2	4	1	5001	500114	50010202	16	1	1	60.1912	1	29	520.776	543.634	539.418	568.812	581.319	518.577	614.727	560.076	586.253
792	35	3	3	50011404			1	1	1	35	35	1	1	2	35	3	3	2	2	2	4	2	500102	2	35	0	3	1	2	4	1	5001	500114	50010202	9	1	1	60.1912	1	29	551.397	570.081	568.697	554.144	558.652	596.729	636.544	564.708	598.035
792	35	3	3	50011406			0	2	1	35	35	2	1	2	35	3	2	2	2	2	3	4	500102	2	35	0	3	1	2	4	1	5001	500114	50010202	17	1	1	60.1912	1	29	554.903	532.918	542.865	472.329	552.456	490.946	492.195	559.714	538.839
792	35	3	3	50011407			1	1	1	35	35	1	1	2	35	3	5	2	2	1	3	3	500102	2	35	0	3	1	2	4	1	5001	500114	50010202	18	1	1	60.1912	1	29	516.565	526.293	556.578	546.245	617.274	548.356	577.369	613.432	547.132
792	35	3	3	50011408			1	2	1	35	35	2	1	2	35	3	2	2	2	1	1	1	500102	2	35	0	3	1	2	4	1	5001	500114	50010202	1	1	1	60.1912	1	29	622.145	575.2	647.754	607.318	591.581	554.846	511.909	604.012	598.227
792	35	3	3	50011409			0	1	1	35	35	1	1	2	35	4	5	2	2	1	5	6	500102	2	35	0	3	1	2	4	1	5001	500114	50010202	10	1	1	60.1912	1	29	690.247	563.722	629.244	662.271	638.568	686.696	614.497	639.796	610.293
792	35	3	3	50011411			0	2	1	35	35	2	1	2	35	3	3	2	2	3	4	4	500102	2	35	0	3	1	2	4	1	5001	500114	50010202	11	1	1	60.1912	1	29	634.665	599.047	559.346	594.051	544.9	565.978	554.595	596.647	553.683
792	35	3	3	50011412			0	1	1	35	35	1	1	3	35	3	4	2	2	1	3	4	500102	2	35	0	3	1	2	4	1	5001	500114	50010202	12	1	1	60.1912	1	29	627.718	747.564	661.281	605.751	616.576	594.123	675.27	633.445	690.8
792	35	3	3	50011413			1	2	1	35	35	2	3	2	35	3	3	2	2	3	1	3	500102	2	35	0	3	1	2	4	1	5001	500114	50010202	3	1	1	60.1912	1	29	685.018	610.365	684.895	672.077	692.785	681.512	647.068	639.684	586.963
792	35	3	3	50011414			0	1	1	35	35	1	2	2	35	3	4	2	2	1	3	4	500102	2	35	0	3	1	2	4	1	5001	500114	50010202	4	1	1	60.1912	1	29	619.469	624.902	675.174	630.976	771.511	680.914	715.423	676.766	681.49
792	35	3	3	50011415			1	1	1	35	35	1	1	2	35	2	3	2	2	2	3	1	500102	2	35	0	3	1	2	4	1	5001	500114	50010202	13	1	1	60.1912	1	29	640.326	634.704	642.181	672.436	624.388	704.176	693.261	685.897	677.527
792	35	3	3	50011416			0	2	1	35	35	2	2	2	35	3	2	2	2	3	1	3	500102	2	35	0	3	1	2	4	1	5001	500114	50010202	14	1	1	60.1912	1	29	544.808	544.155	517.678	531.2	539.959	581.617	582.629	494.204	504.189
792	35	3	3	50011417			0	1	1	35	35	1	1	2	35	4	4	2	2	1	3	5	500102	2	35	0	3	1	2	4	1	5001	500114	50010202	15	1	1	60.1912	1	29	534.256	624.03	589.668	640.296	609.904	646.276	545.419	649.745	701.638
792	35	3	3	50011418			1	2	1	35	35	2	3	2	35	5	4	1	1	2	1	1	500102	2	35	0	3	1	2	4	1	5001	500114	50010202	5	1	1	60.1912	1	29	576.349	571.684	573.373	563.747	560.039	634.964	562.438	565.155	537.411
792	35	3	3	50011419			0	2	1	35	35	2	1	2	35	3	4	2	2	2	3	6	500102	2	35	0	3	1	2	4	1	5001	500114	50010202	6	1	1	60.1912	1	29	599.131	579.081	581.243	597.177	558.08	589.857	535.312	565.43	539.601
792	35	3	3	50011420			0	2	1	35	35	2	2	2	35	5	4	2	2	2	9	5	500102	2	35	0	3	1	2	4	1	5001	500114	50010202	7	1	1	60.1912	1	29	495.023	550.271	573.057	558.377	573.324	505.46	583.564	544.43	561.971
792	35	3	3	50011421			1	1	1	35	35	1	1	2	35	4	4	2	1	3	1	3	500102	2	35	0	3	1	2	4	1	5001	500114	50010202	8	1	1	60.1912	1	29	628.199	634.769	667.93	622.734	633.142	666.071	685.377	634.753	588.09
792	35	3	3	50011422			0	2	1	35	35	2	2	2	35	3	3	2	2	3	3	4	500102	2	35	0	3	1	2	4	1	5001	500114	50010202	9	1	1	60.1912	1	29	494.488	501.976	495.914	471.805	480.112	500.531	469.705	544.872	483.766
792	35	3	3	50011423			1	1	1	35	35	1	1	2	35	4	2	2	1	1	1	1	500102	2	35	0	3	1	2	4	1	5001	500114	50010202	16	1	1	60.1912	1	29	572.121	601.683	618.765	577.187	641.797	517.928	555.832	594.773	623.045
792	35	3	3	50011425			0	1	1	35	35	1	1	1	35	2	1	3	3	1	3	6	500102	2	35	0	3	1	2	4	1	5001	500114	50010202	1	1	1	60.1912	1	29	599.501	643.391	644.087	619.157	672.867	623.12	582.348	600.481	616.212
792	35	3	3	50011426			0	1	1	35	35	1	1	2	35	2	2	2	2	1	3	1	500102	2	35	0	3	1	2	4	1	5001	500114	50010202	18	1	1	60.1912	1	29	704.39	562.673	567.871	596.613	599.812	636.429	683.462	624.379	639.736
792	35	3	3	50011427			0	2	1	35	35	2	1	3	35	4	5	2	2	2	5	1	500102	2	35	0	3	1	2	4	1	5001	500114	50010202	10	1	1	60.1912	1	29	462.64	526.58	499.433	530.823	518.838	487.125	498.898	485.579	563.533
792	35	3	3	50011428			1	1	1	35	35	1	1	2	35	3	4	2	2	2	1	3	500102	2	35	0	3	1	2	4	1	5001	500114	50010202	11	1	1	60.1912	1	29	522.713	494.87	494.87	493.423	498.711	474.282	429.787	470.551	493.202
792	35	3	3	50011429			0	1	1	35	35	1	1	3	35	3	2	2	2	2	5	2	500102	2	35	0	3	1	2	4	1	5001	500114	50010202	2	1	1	60.1912	1	29	504.925	496.813	508.711	472.446	519.951	548.14	510.909	463.282	537.404
792	35	3	3	50011430			0	1	1	35	35	1	3	2				9					500102	2	35	0	3	1	2	4	1	5001	500114	50010202	12	1	1	60.1912	1	29	668.721	621.393	586.271	682.216	595.771	588.577	597.571	670.694	602.943
792	35	3	3	50011431			0	2	1	35	35	2	1	3	35	3	3	2	2	1	3	2	500102	2	35	0	3	1	2	4	1	5001	500114	50010202	13	1	1	60.1912	1	29	591.444	563.607	583.045	546.571	580.667	554.084	526.255	584.555	547.595
792	35	3	3	50011432			0	2	1	35	35	2	1	2	35	5	3	2	2	1	4	2	500102	2	35	0	3	1	2	4	1	5001	500114	50010202	3	1	1	60.1912	1	29	495.981	472.285	520.783	517.574	552.338	537.234	544.58	516.943	516.937
792	35	3	3	50011433			0	1	1	35	35	1	2	1	35	2	3	2	2	2	3	5	500102	2	35	0	3	1	2	4	1	5001	500114	50010202	4	1	1	60.1912	1	29	675.616	631.627	662.554	713.59	637.815	698.693	666.217	680.635	597.978
792	35	3	3	50011434			0	2	1	35	35	2	1	2	35	3	5	2	2	1	2	4	500102	2	35	0	3	1	2	4	1	5001	500114	50010202	5	1	1	60.1912	1	29	553.866	602.271	577.114	581.875	581.853	520.322	578.364	581.603	547.227
792	35	4	1	50020101			1	2	1	35	35	2	1	3	35	2	2	2	3	3	3	5	500201	1	35	0	3	1	2	4	1	5002	500201	50020101	5	1	1	179.833	0	7	501.745	530.309	529.492	561.728	491.634	539.332	493.448	527.57	501.935
792	35	4	1	50020102			0	2	1	35	35	2	1	2	35	4	3	2	2	1	5	6	500201	1	35	0	3	1	2	4	1	5002	500201	50020101	6	1	1	179.833	0	7	607.447	594.154	584.247	634.022	622.293	558.634	544.575	545.265	619.574
792	35	4	1	50020103			0	2	1	35	35	2	1	1	35	2	2	3	3	3	5	4	500201	1	35	0	3	1	2	4	1	5002	500201	50020101	7	1	1	179.833	0	7	534.33	503.758	514.127	530.973	525.058	537.807	481.284	474.658	500.188
792	35	4	1	50020104			1	2	1	35	35	2	1	2	35	2	1	2	3	2	9	5	500201	1	35	0	3	1	2	4	1	5002	500201	50020101	8	1	1	179.833	0	7	480.737	519.177	428.756	484.853	494.004	438.38	468.382	460.547	478.547
792	35	4	1	50020106			0	2	1	35	35	2	1	3	35	2	1	2	3	2	3	4	500201	1	35	0	3	1	2	4	1	5002	500201	50020101	11	1	1	179.833	0	7	464.831	481.206	491.808	488.412	497.904	500.9	488.634	507.872	478.419
792	35	4	1	50020107			1	1	1	35	35	1	1	2	35	5	5	2	2	1	4	5	500201	1	35	0	3	1	2	4	1	5002	500201	50020101	12	1	1	179.833	0	7	613.54	550.215	565.877	614.081	558.218	543.678	597.954	572.93	520.871
792	35	4	1	50020108			0	1	1	35	35	1	1	3	35	1	1	3	3	3	4	5	500201	1	35	0	3	1	2	4	1	5002	500201	50020101	13	1	1	179.833	0	7	452.24	483.02	393.97	455.186	498.642	498.722	423.083	510.648	457.861
792	35	4	1	50020109			0	2	1	35	35	2	1	2	35	4	4	2	2	1	3	4	500201	1	35	0	3	1	2	4	1	5002	500201	50020101	14	1	1	179.833	0	7	565.984	527.718	534.84	533.445	552.196	581.342	528.373	557.222	569.056
792	35	4	1	50020110			0	1	1	35	35	1	1	3	35	4	4	2	1	1	1	3	500201	1	35	0	3	1	2	4	1	5002	500201	50020101	1	1	1	179.833	0	7	558.595	521.09	552.599	596.318	526.19	559.549	583.173	539.76	529.219
792	35	4	1	50020111			1	2	1	35	35	2	2	3	35	5	5	2	1	1	3	3	500201	1	35	0	3	1	2	4	1	5002	500201	50020101	15	1	1	179.833	0	7	674.645	613.494	641.306	631.375	600.491	648.83	665.513	560.948	570.492
792	35	4	1	50020112			1	2	1	35	35	2	1	2	35	4	3	2	2	1	3	3	500201	1	35	0	3	1	2	4	1	5002	500201	50020101	2	1	1	179.833	0	7	571.504	555.729	546.23	547.866	558.504	495.998	544.532	573.743	570.818
792	35	4	1	50020113			0	1	1	35	35	1	1	2	35	3	3	2	2	1	3	4	500201	1	35	0	3	1	2	4	1	5002	500201	50020101	16	1	1	179.833	0	7	486.346	489.063	483.189	436.823	454.942	506.774	455.161	491.79	511.286
792	35	4	1	50020115			1	1	1	35	35	1	1	3	35	2	2	2	2	2	3	3	500201	1	35	0	3	1	2	4	1	5002	500201	50020101	18	1	1	179.833	0	7	520.122	542.212	487.975	487.961	528.302	510.04	541.243	468.651	542.246
792	35	4	1	50020116			1	2	1	35	35	2	1	3	35	3	3	2	2	2	3	4	500201	1	35	0	3	1	2	4	1	5002	500201	50020101	10	1	1	179.833	0	7	594.463	576.836	608.435	567.781	584.26	626.915	530.878	565.042	547.558
792	35	4	1	50020118			0	1	1	35	35	1	2	2	35	3	3	2	2	3	5	3	500201	1	35	0	3	1	2	4	1	5002	500201	50020101	4	1	1	179.833	0	7	526.651	515.873	522.224	527.229	533.093	517.609	552.397	530.547	575.252
792	35	4	2	50030301			0	2	1	35	35	2	1	2	35	2	2	2	3	3	3	5	500301	1	35	0	2	1	2	4	1	5003	500303	50030101	11	1	1	355.989	1	4	517.599	498.097	500.424	541.061	538.182	507.478	502.722	526.885	515.471
792	35	4	2	50030302			0	2	1	35	35	2	1	2	35	4	4	2	2	2	4	5	500301	1	35	0	2	1	2	4	1	5003	500303	50030101	7	1	1	355.989	1	4	542.91	573.22	573.759	575.835	573.276	572.903	577.568	523.8	581.342
792	35	4	2	50030303			0	2	1	35	35	2	2	2	35	2	4	2	2	2	3	4	500301	1	35	0	2	1	2	4	1	5003	500303	50030101	8	1	1	355.989	1	4	454.077	460.419	435.955	440.505	443.564	403.728	457.398	413.084	455.116
792	35	4	2	50030304			0	2	1	35	35	2	1	1	35	2	9	9	3	2	5	9	500301	1	35	0	2	1	2	4	1	5003	500303	50030101	12	1	1	355.989	1	4	469.623	493.408	523.05	473.894	466.669	445.03	497.609	472.21	483.194
792	35	4	2	50030306			0	2	1	35	35	2	1	3	35	3	4	2	2	1	3	2	500301	1	35	0	2	1	2	4	1	5003	500303	50030101	13	1	1	355.989	1	4	371.458	388.541	360.719	350.942	370.101	371.339	321.59	315.235	376.889
792	35	4	2	50030307			1	2	1	35	35	2	1	2	35	2	3	2	2	3	4	2	500301	1	35	0	2	1	2	4	1	5003	500303	50030101	1	1	1	355.989	1	4	431.375	445.691	390.331	410.617	378.71	444.85	404.703	416.367	392.14
792	35	4	2	50030309			1	1	1	35	35	1	2	9	35	3	2	2	2	1	3	4	500301	1	35	0	2	1	2	4	1	5003	500303	50030101	14	1	1	355.989	1	4	511.435	506.315	544.069	471.49	506.689	546.55	482.318	498.441	518.522
792	35	4	2	50030310			0	1	1	35	35	1	1	1	35	1	2	3	3	2	5	5	500301	1	35	0	2	1	2	4	1	5003	500303	50030101	15	1	1	355.989	1	4	423.486	456.845	425.719	428.088	437.338	472.413	410.102	488.991	431.292
792	35	4	2	50030311			0	2	1	35	35	2	1	3	35	2	4	2	2	2	1	3	500301	1	35	0	2	1	2	4	1	5003	500303	50030101	2	1	1	355.989	1	4	567.766	577.099	575.006	548.898	643.777	567.283	532.969	546.215	564.512
792	35	4	2	50030312			1	1	1	35	35	1	1	3	35	3	5	2	2	3	3	4	500301	1	35	0	2	1	2	4	1	5003	500303	50030101	16	1	1	355.989	1	4	483.593	542.239	529.818	501.206	508.285	568.652	523.745	536.004	511.846
792	35	4	2	50030313			0	2	1	35	35	2	3	3	35	2	2	2	2	1	4	2	500301	1	35	0	2	1	2	4	1	5003	500303	50030101	3	1	1	355.989	1	4	540.12	544.319	516.426	545.406	578.027	548.506	565.631	468.371	534.518
792	35	4	2	50030314			1	2	1	35	35	2	2	3	35	2	1	2	3	2	3	4	500301	1	35	0	2	1	2	4	1	5003	500303	50030101	4	1	1	355.989	1	4	582.049	545.391	541.675	557.782	537.227	539.272	571.337	573.111	553.08
792	35	4	2	50030315			0	2	1	35	35	2	2	2	35	3	2	2	2	1	3	5	500301	1	35	0	2	1	2	4	1	5003	500303	50030101	5	1	1	355.989	1	4	390.182	442.182	448.43	438.679	401.393	425.064	334.719	406.844	341.446
792	35	4	2	50030316			0	1	1	35	35	1	1	3	35	5	5	2	1	1	2	4	500301	1	35	0	2	1	2	4	1	5003	500303	50030101	6	1	1	355.989	1	4	521.599	520.369	498.676	491.524	473.003	462.58	467.601	514.678	452.879
792	35	4	2	50030317			0	2	1	35	35	2	1	1	35	3	3	2	2	2	4	6	500301	1	35	0	2	1	2	4	1	5003	500303	50030101	17	1	1	355.989	1	4	412.528	436.778	422.165	505.152	453.955	407.807	440.29	385.902	406.247
792	35	4	2	50030318			0	2	1	35	35	2	2	3	35	3	2	2	2	2	3	1	500301	1	35	0	2	1	2	4	1	5003	500303	50030101	18	1	1	355.989	1	4	553.965	530.766	566.787	573.103	575.757	551.687	514.687	523.203	559.543
792	35	4	2	50030319			1	1	1	35	35	1	2	2	35	3	2	2	3	2	5	4	500301	1	35	0	2	1	2	4	1	5003	500303	50030101	10	1	1	355.989	1	4	433.661	453.601	421.337	428.228	485.285	424.344	526.243	527.163	468.149
792	35	4	2	50030320			0	2	1	35	35	2	1	3	35	1	2	2	3	3	2	4	500301	1	35	0	2	1	2	4	1	5003	500303	50030101	11	1	1	355.989	1	4	635.186	580.893	580.285	576.858	579.878	620.457	601.474	649.087	628.759
792	35	4	2	50030321			1	1	1	35	35	1	2	2	35	2	3	2	2	2	2	3	500301	1	35	0	2	1	2	4	1	5003	500303	50030101	12	1	1	355.989	1	4	593.391	540.034	518.473	515.215	551.51	590.969	460.077	531.947	606.602
792	35	4	2	50030322			1	1	1	35	35	1	1	3	35	2	2	2	2	2	2	4	500301	1	35	0	2	1	2	4	1	5003	500303	50030101	7	1	1	355.989	1	4	464.828	441.737	446.879	345.825	391.575	438.277	445.184	396.558	357.722
792	35	4	3	50040101			0	2	1	35	35	2	1	1	35	2	2	2	3	3	4	4	500401	1	35	0	2	1	2	4	1	5004	500401	50040101	8	1	1	475.658	0	24	405.914	442.89	444.086	486.771	451.024	443.002	468.24	484.352	378.745
792	35	4	3	50040102			0	2	1	35	35	2	1	1	35	3	3	2	2	3	3	2	500401	1	35	0	2	1	2	4	1	5004	500401	50040101	9	1	1	475.658	0	24	495.02	466.738	500.389	523.834	506.918	502.828	436.408	496.925	459.324
792	35	4	3	50040103			0	2	1	35	35	2	1	1	35	2	2	3	3	3	5	4	500401	1	35	0	2	1	2	4	1	5004	500401	50040101	11	1	1	475.658	0	24	303.565	310.421	319.248	343.178	281.997	319.679	276.202	274.311	334.458
792	35	4	3	50040104			1	1	1	35	35	1	2	2	35	1	1	3	3	3	5	5	500401	1	35	0	2	1	2	4	1	5004	500401	50040101	1	1	1	475.658	0	24	356.531	442.671	390.584	377.495	390.779	277.763	316.917	345.197	331.305
792	35	4	3	50040105			0	2	1	35	35	2	2	2	35	3	2	3	3	1	5	5	500401	1	35	0	2	1	2	4	1	5004	500401	50040101	12	1	1	475.658	0	24	291.258	263.202	293.458	287.582	269.329	233.877	294.971	298.119	314.994
792	35	4	3	50040106			0	2	1	35	35	2	3	1	35	1	1	3	3	3	5	5	500401	1	35	0	2	1	2	4	1	5004	500401	50040101	2	1	1	475.658	0	24	347.074	270.562	347.502	286.584	355.681	308.857	286.634	288.344	411.291
792	35	4	3	50040107			1	1	1	35	35	1	1	2	35	1	1	3	3	3	4	5	500401	1	35	0	2	1	2	4	1	5004	500401	50040101	13	1	1	475.658	0	24	304.879	240.212	249.472	293.563	267.876	311.102	316.125	272.141	309.112
792	35	4	3	50040108			0	1	1	35	35	1	2	1	35	1	1	3	3	3	5	5	500401	1	35	0	2	1	2	4	1	5004	500401	50040101	14	1	1	475.658	0	24	435.258	410.545	403.08	460.179	437.503	394.044	429.546	401.425	412.269
792	35	4	3	50040109			0	1	1	35	35	1	1	2	35	1	1	3	3	3	5	5	500401	1	35	0	2	1	2	4	1	5004	500401	50040101	3	1	1	475.658	0	24	386.216	346.962	384.039	332.695	343.303	407.249	341.043	360.598	357.188
792	35	4	3	50040110			0	2	1	35	35	2	2	2	35	1	1	3	3	3	5	5	500401	1	35	0	2	1	2	4	1	5004	500401	50040101	15	1	1	475.658	0	24	354.257	259.085	285.062	233.338	307.656	224.377	328.088	291.304	304.659
792	35	4	3	50040111			0	1	1	35	35	1	2	3	35	1	1	3	3	2	5	4	500401	1	35	0	2	1	2	4	1	5004	500401	50040101	4	1	1	475.658	0	24	388.355	370.73	391.28	309.285	363.841	414.536	356.212	364.142	415.563
792	35	4	3	50040112			1	2	1	35	35	2	1	1	35	2	1	3	3	3	5	6	500401	1	35	0	2	1	2	4	1	5004	500401	50040101	16	1	1	475.658	0	24	341.576	350.639	333.14	336.419	342.612	360.875	325.592	339.904	326.641
792	35	4	3	50040113			0	1	1	35	35	1	1	2	35	1	1	2	3	3	4	5	500401	1	35	0	2	1	2	4	1	5004	500401	50040101	17	1	1	475.658	0	24	389.415	332.144	369.363	344.26	328.62	320.405	264.461	339.834	329.326
792	35	4	3	50040114			0	2	1	35	35	2	1	2	35	3	2	2	2	2	5	2	500401	1	35	0	2	1	2	4	1	5004	500401	50040101	18	1	1	475.658	0	24	412.384	453.921	408.84	450.923	378.751	491.081	453.654	527.752	396.685
792	35	4	3	50040115			1	2	1	35	35	2	2	1	35	1	1	3	3	3	5	5	500401	1	35	0	2	1	2	4	1	5004	500401	50040101	10	1	1	475.658	0	24	425.631	483.366	473.767	416.66	468.321	420.21	435.181	412.304	377.167
792	35	4	3	50040116			1	2	1	35	35	2	1	1	35	1	1	3	3	3	5	5	500401	1	35	0	2	1	2	4	1	5004	500401	50040101	5	1	1	475.658	0	24	353.046	320.822	383.341	403.735	373.783	313.029	353.976	286.966	304.53
792	35	4	3	50040117			0	2	1	35	35	2	2	9	35	1	1	3	3	3	5	6	500401	1	35	0	2	1	2	4	1	5004	500401	50040101	6	1	1	475.658	0	24	376.552	384.444	383.481	388.106	330.448	397.025	407.855	289.375	490.38
792	35	4	3	50040118			0	2	1	35	35	2	2	1	35	1	1	3	3	3	4	4	500401	1	35	0	2	1	2	4	1	5004	500401	50040101	7	1	1	475.658	0	24	388.445	366.704	383.616	381.157	374.065	387.81	394.035	435.874	327.957
792	35	4	1	50050101			1	1	1	35	35	1	1	3	35	3	4	2	2	1	3	4	500501	1	35	0	3	1	2	4	1	5005	500501	50050101	14	1	1	266.46	0	42	548.886	513.825	519.852	508.987	450.084	522.967	553.01	532.408	544.129
792	35	4	1	50050102			1	1	1	35	35	1	3	2	35	1	2	3	3	3	5	5	500501	1	35	0	3	1	2	4	1	5005	500501	50050101	5	1	1	266.46	0	42	389.288	467.22	369.344	415.945	317.271	488.627	404.666	420.567	402.161
792	35	4	1	50050104			1	1	1	35	35	1	3	3	35	2	3	2	3	2	4	5	500501	1	35	0	3	1	2	4	1	5005	500501	50050101	7	1	1	266.46	0	42	434.712	495.901	412.036	456.573	410.399	472.307	449.802	448.227	348.466
792	35	4	1	50050105			0	2	1	35	35	2	1	2	35	2	2	2	3	2	3	5	500501	1	35	0	3	1	2	4	1	5005	500501	50050101	8	1	1	266.46	0	42	577.32	571.531	601.934	542.122	535.272	631.514	618.418	588.424	580.027
792	35	4	1	50050106			1	2	1	35	35	2	1	9	35	1	2	2	3	1	3	4	500501	1	35	0	3	1	2	4	1	5005	500501	50050101	9	1	1	266.46	0	42	488.002	546.463	504.142	516.979	491.032	490.309	546.803	533.324	512.655
792	35	4	1	50050107			0	1	1	35	35	1	3	3	35	2	4	2	2	2	4	1	500501	1	35	0	3	1	2	4	1	5005	500501	50050101	15	1	1	266.46	0	42	548.853	569.332	617.392	588.472	624.997	565.195	594.841	595.869	583.447
792	35	4	1	50050108			0	2	1	35	35	2	1	3	35	3	5	2	2	1	2	4	500501	1	35	0	3	1	2	4	1	5005	500501	50050101	1	1	1	266.46	0	42	522.661	585.379	586.857	541.194	557.178	492.505	537.906	528.164	550.484
792	35	4	1	50050109			0	1	1	35	35	1	2	3	35	1	1	2	3	2	3	4	500501	1	35	0	3	1	2	4	1	5005	500501	50050101	2	1	1	266.46	0	42	457.075	435.725	441.157	447.749	432.751	421.135	441.04	468.668	432.962
792	35	4	1	50050110			0	2	1	35	35	2	1	2	35	2	3	2	2	2	3	5	500501	1	35	0	3	1	2	4	1	5005	500501	50050101	16	1	1	266.46	0	42	410.585	387.572	447.902	423.986	365.788	480.278	417.2	439.247	475.088
792	35	4	1	50050111			1	2	1	35	35	2	2	3	35	1	3	2	3	2	5	5	500501	1	35	0	3	1	2	4	1	5005	500501	50050101	17	1	1	266.46	0	42	640.744	567.691	617.932	595.924	519.702	638.224	598.47	568.365	512.714
792	35	4	1	50050112			1	2	1	35	35	2	1	3	35	2	2	2	2	2	3	3	500501	1	35	0	3	1	2	4	1	5005	500501	50050101	3	1	1	266.46	0	42	507.732	504.196	507.117	519.646	517.785	459.715	447.151	465.674	491.592
792	35	4	1	50050113			0	1	1	35	35	1	1	2	35	3	4	2	2	1	3	4	500501	1	35	0	3	1	2	4	1	5005	500501	50050101	18	1	1	266.46	0	42	488.245	512.186	473.789	512.918	490.473	547.347	498.652	454.518	553.54
792	35	4	1	50050115			1	1	1	35	35	1	1	1	35	1	2	3	3	2	5	5	500501	1	35	0	3	1	2	4	1	5005	500501	50050101	11	1	1	266.46	0	42	450.002	424.77	466.909	430.765	461.574	410.461	410.125	459.459	418.614
792	35	4	1	50050116			0	1	1	35	35	1	1	3	35	2	1	3	3	2	5	4	500501	1	35	0	3	1	2	4	1	5005	500501	50050101	4	1	1	266.46	0	42	351.923	375.148	338.052	388.461	302.017	375.799	388.024	375.911	354.241
792	35	4	1	50050117			0	1	1	35	35	1	1	3	35	3	3	2	2	1	3	4	500501	1	35	0	3	1	2	4	1	5005	500501	50050101	12	1	1	266.46	0	42	531.036	553.576	544.008	557.659	622.2	557.96	490.322	605.799	470.026
792	35	4	1	50050118			0	2	1	35	35	2	1	1	35	3	2	3	3	1	4	4	500501	1	35	0	3	1	2	4	1	5005	500501	50050101	13	1	1	266.46	0	42	295.365	343.28	348.724	341.326	325.564	269.979	294.324	365.968	303.054
792	35	4	1	50050119			0	1	1	35	35	1	1	2	35	1	2	2	3	3	4	5	500501	1	35	0	3	1	2	4	1	5005	500501	50050101	5	1	1	266.46	0	42	529.519	561.775	565.435	542.732	569.86	569.968	548.898	527.01	538.969
792	35	4	1	50060201			1	1	1	35	35	1	1	2	35	3	3	2	2	2	4	5	500601	1	35	0	3	1	2	4	1	5006	500602	50060101	8	1	1	483.086	1	84	477.028	473.659	498.316	457.604	476.349	520.316	451.007	551.555	472.243
792	35	4	1	50060203			0	2	1	35	35	2	2	2	35	2	2	2	3	3	5	5	500601	1	35	0	3	1	2	4	1	5006	500602	50060101	11	1	1	483.086	1	84	428.031	437.944	435.428	425.086	430.846	431.356	418.572	416.611	349.662
792	35	4	1	50060204			0	2	1	35	35	2	1	9	35	1	1	3	3	3	5	4	500601	1	35	0	3	1	2	4	1	5006	500602	50060101	12	1	1	483.086	1	84	391.638	373.433	325.507	321.759	403.448	368.631	397.097	370.008	399.979
792	35	4	1	50060205			1	1	1	35	35	1	2	2	35	3	3	2	3	2	5	5	500601	1	35	0	3	1	2	4	1	5006	500602	50060101	1	1	1	483.086	1	84	584.77	544.735	567.165	536.176	597.675	575.043	605.353	646.942	633.277
792	35	4	1	50060206			0	1	1	35	35	1	2	1	35	3	3	3	3	2	5	4	500601	1	35	0	3	1	2	4	1	5006	500602	50060101	2	1	1	483.086	1	84	564.986	507.568	489.186	510.595	498.057	518.202	484.244	599.469	521.198
792	35	4	1	50060207			1	1	1	35	35	1	2	2	35	3	3	2	2	2	3	5	500601	1	35	0	3	1	2	4	1	5006	500602	50060101	13	1	1	483.086	1	84	477.507	459.714	432.135	416.655	405.846	480.932	493.609	434.121	391.693
792	35	4	1	50060208			0	1	1	35	35	1	1	2	35	3	3	2	2	2	4	6	500601	1	35	0	3	1	2	4	1	5006	500602	50060101	3	1	1	483.086	1	84	493.032	476.374	525.917	481.182	488.506	500.225	473.667	497.918	488.848
792	35	4	1	50060209			1	1	1	35	35	1	2	2	35	3	3	2	2	2	3	5	500601	1	35	0	3	1	2	4	1	5006	500602	50060101	4	1	1	483.086	1	84	386.792	397.585	400.952	427.723	403.284	403.079	313.664	386.444	380.412
792	35	4	1	50060210			0	1	1	35	35	1	2	2	35	3	3	2	3	2	5	4	500601	1	35	0	3	1	2	4	1	5006	500602	50060101	5	1	1	483.086	1	84	416	391.509	425.809	386.657	450.755	430.203	395.968	404.354	417.022
792	35	4	1	50060211			0	1	1	35	35	1	2	3	35	2	2	2	3	3	5	5	500601	1	35	0	3	1	2	4	1	5006	500602	50060101	14	1	1	483.086	1	84	364.138	338.614	337.648	385.773	411.123	361.532	357.105	364.277	405.834
792	35	4	1	50060212			0	2	1	35	35	2	1	2	35	3	3	2	3	2	5	5	500601	1	35	0	3	1	2	4	1	5006	500602	50060101	15	1	1	483.086	1	84	418.94	487.888	446.2	493.959	502.977	496.593	448.635	475.511	434.083
792	35	4	1	50060213			1	2	1	35	35	2	1	2	35	4	4	2	2	3	3	5	500601	1	35	0	3	1	2	4	1	5006	500602	50060101	16	1	1	483.086	1	84	610.577	561.792	579.554	601.973	589.14	538.731	624.353	578.931	504.146
792	35	4	1	50060215			0	2	1	35	35	2	2	2	35	3	3	2	2	3	4	4	500601	1	35	0	3	1	2	4	1	5006	500602	50060101	17	1	1	483.086	1	84	455.74	451.572	453.122	449.655	459.995	455.902	480.613	503.337	445.52
792	35	4	1	50060216			0	1	1	35	35	1	1	3	35	3	3	2	2	2	4	3	500601	1	35	0	3	1	2	4	1	5006	500602	50060101	7	1	1	483.086	1	84	485.852	485.675	549.225	503.473	516.975	518.695	499.398	523.657	512.508
792	35	4	1	50060217			0	2	1	35	35	2	1	2	35	2	2	3	3	3	5	5	500601	1	35	0	3	1	2	4	1	5006	500602	50060101	18	1	1	483.086	1	84	290.288	272.29	360.443	345.205	326.105	289.56	308.625	352.51	320.98
792	35	4	1	50060218			1	2	1	35	35	2	1	1	35	4	4	2	2	2	4	5	500601	1	35	0	3	1	2	4	1	5006	500602	50060101	10	1	1	483.086	1	84	445.99	492.513	512.73	444.02	440.933	509.008	518.543	509.606	467.052
792	35	4	2	50070102			0	1	1	35	35	1	2	3	35	3	2	2	2	2	5	2	500701	1	35	0	3	1	2	4	1	5007	500701	50070101	18	1	1	249.177	0	32	565.239	535.273	534.416	550.642	536.358	591.94	570.621	538.896	608.295
792	35	4	2	50070103			1	1	1	35	35	1	3	3	35	4	4	1	1	2	1	3	500701	1	35	0	3	1	2	4	1	5007	500701	50070101	10	1	1	249.177	0	32	540.219	530.031	588.746	536.866	560.491	551.523	550.508	585.041	533.184
792	35	4	2	50070104			0	2	1	35	35	2	3	3	35	3	5	2	2	1	2	3	500701	1	35	0	3	1	2	4	1	5007	500701	50070101	6	1	1	249.177	0	32	609.497	604.139	591.387	595.82	616.517	628.908	535.726	601.453	583.292
792	35	4	2	50070105			0	2	1	35	35	2	1	3	35	4	4	2	2	1	5	6	500701	1	35	0	3	1	2	4	1	5007	500701	50070101	7	1	1	249.177	0	32	534.394	526.504	492.285	506.406	496.77	548.342	519.603	518.918	558.937
792	35	4	2	50070106			0	2	1	35	35	2	2	2	35	3	4	2	2	3	3	3	500701	1	35	0	3	1	2	4	1	5007	500701	50070101	11	1	1	249.177	0	32	513.433	513.738	525.375	480.197	510.08	515.85	521.37	554.537	556.513
792	35	4	2	50070107			0	1	1	35	35	1	1	2	35	3	2	2	2	2	2	3	500701	1	35	0	3	1	2	4	1	5007	500701	50070101	8	1	1	249.177	0	32	401.508	399.647	425.17	386.18	443.665	383.569	332.901	351.994	386.944
792	35	4	2	50070108			0	2	1	35	35	2	1	3	35	3	3	2	2	1	4	3	500701	1	35	0	3	1	2	4	1	5007	500701	50070101	9	1	1	249.177	0	32	447.185	498.575	488.991	528.901	463.796	507.083	519.617	477.524	481.423
792	35	4	2	50070110			0	2	1	35	35	2	1	3	35	2	2	2	3	3	5	5	500701	1	35	0	3	1	2	4	1	5007	500701	50070101	13	1	1	249.177	0	32	404.049	418.131	450.92	389.946	451.239	468.316	445.849	490.178	497.594
792	35	4	2	50070111			0	2	1	35	35	2	1	3	35	2	2	2	2	2	4	1	500701	1	35	0	3	1	2	4	1	5007	500701	50070101	1	1	1	249.177	0	32	587.791	559.282	581.064	544.274	494.197	558.271	555.232	540.75	561.77
792	35	4	2	50070113			1	1	1	35	35	1	2	3	35	4	4	1	1	2	1	1	500701	1	35	0	3	1	2	4	1	5007	500701	50070101	14	1	1	249.177	0	32	541.96	581.626	575.155	541.873	488.906	523.64	530.555	524.631	541.71
792	35	4	2	50070114			0	1	1	35	35	1	1	3	35	1	3	2	2	2	1	4	500701	1	35	0	3	1	2	4	1	5007	500701	50070101	15	1	1	249.177	0	32	545.023	606.069	538.054	567.298	518.209	560.536	566.048	540.443	524.205
792	35	4	2	50070115			0	1	1	35	35	1	1	3	35	5	5	1	1	1	1	3	500701	1	35	0	3	1	2	4	1	5007	500701	50070101	3	1	1	249.177	0	32	577.532	666.983	603.162	599.316	579.542	630.5	627.313	586.931	632.162
792	35	4	2	50070116			0	1	1	35	35	1	1	2	35	2	2	2	3	2	4	6	500701	1	35	0	3	1	2	4	1	5007	500701	50070101	16	1	1	249.177	0	32	536.627	554.622	492.003	515.786	495.648	543.645	523.053	499.62	525.971
792	35	4	2	50070117			0	2	1	35	35	2	2	2	35	2	1	2	3	3	4	4	500701	1	35	0	3	1	2	4	1	5007	500701	50070101	4	1	1	249.177	0	32	513.964	491.689	514.147	468.504	509.716	450.295	449.792	502.281	480.402
792	35	4	2	50070118			1	1	1	35	35	1	2	3	35	4	4	1	1	1	1	1	500701	1	35	0	3	1	2	4	1	5007	500701	50070101	17	1	1	249.177	0	32	566.767	593.848	621.954	641.481	673.327	654.425	589.836	654.878	640.248
792	35	4	2	50070119			1	1	1	35	35	1	1	3	35	1	2	2	2	3	1	3	500701	1	35	0	3	1	2	4	1	5007	500701	50070101	5	1	1	249.177	0	32	558.86	562.078	542.922	563.935	548.062	554.804	534.122	504.109	573.238
792	35	4	2	50070122			0	1	1	35	35	1	2	3	35	2	2	2	3	3	5	5	500701	1	35	0	3	1	2	4	1	5007	500701	50070101	10	1	1	249.177	0	32	509.006	589.527	552.052	527.276	507.776	515.4	460.409	500.071	466.422
792	35	4	2	50070123			0	2	1	35	35	2	1	3	35	2	1	2	3	1	4	5	500701	1	35	0	3	1	2	4	1	5007	500701	50070101	7	1	1	249.177	0	32	462.2	469.404	417.733	444.151	442.946	447.878	426.994	453.36	395.519
792	35	4	2	50070124			1	2	1	35	35	2	2	2	35	1	1	3	3	1	5	4	500701	1	35	0	3	1	2	4	1	5007	500701	50070101	8	1	1	249.177	0	32	586.321	560.514	555.923	547.218	568.839	583.393	539.261	543.107	598.822
792	35	4	2	50070125			0	1	1	35	35	1	1	3	35	1	4	2	3	2	5	3	500701	1	35	0	3	1	2	4	1	5007	500701	50070101	9	1	1	249.177	0	32	526.32	560.373	546.96	509.604	535.499	526.161	518.056	522.418	550.458
792	35	4	2	50070126			1	2	1	35	35	2	2	3	35	3	2	2	2	2	4	3	500701	1	35	0	3	1	2	4	1	5007	500701	50070101	1	1	1	249.177	0	32	467.789	464.992	527.391	473.992	470.039	463.905	486.624	447.385	436.414
792	35	4	2	50070127			0	2	1	35	35	2	1	2	35	3	2	2	3	2	5	4	500701	1	35	0	3	1	2	4	1	5007	500701	50070101	2	1	1	249.177	0	32	402.806	470.098	356.086	432.696	433.862	440.34	474.251	368.708	388.405
792	35	4	2	50070128			0	2	1	35	35	2	3	2	35	4	3	2	2	2	3	3	500701	1	35	0	3	1	2	4	1	5007	500701	50070101	11	1	1	249.177	0	32	518.445	512.473	507.88	533.794	505.073	506.424	560.597	516.975	551.082
792	35	4	2	50070129			1	1	1	35	35	1	2	3	35	3	3	2	2	2	1	3	500701	1	35	0	3	1	2	4	1	5007	500701	50070101	12	1	1	249.177	0	32	465.07	488.437	472.019	538.708	495.223	494.191	510.882	460.864	467.672
792	35	4	2	50070130			0	1	1	35	35	1	2	2	35	2	3	2	2	2	2	3	500701	1	35	0	3	1	2	4	1	5007	500701	50070101	13	1	1	249.177	0	32	402.093	435.452	461.749	386.515	414.358	347.268	433.587	433.093	413.363
792	35	4	1	50080101			0	1	1	35	35	1	1	2	35	2	2	2	3	2	4	5	500801	1	35	0	3	1	2	4	1	5008	500801	50080101	14	1	1	417.175	0	36	576.833	590.932	545.456	599.483	580.393	646.585	554.685	602.155	575.741
792	35	4	1	50080102			0	2	1	35	35	2	1	3	35	2	2	3	3	3	5	4	500801	1	35	0	3	1	2	4	1	5008	500801	50080101	15	1	1	417.175	0	36	385.678	333.296	339.803	378.812	387.253	364.863	430.55	335.834	402.164
792	35	4	1	50080103			1	1	1	35	35	1	2	2	35	2	3	2	2	3	3	5	500801	1	35	0	3	1	2	4	1	5008	500801	50080101	7	1	1	417.175	0	36	473.968	467.453	483.518	464.79	445.959	439.179	396.544	453.791	501.144
792	35	4	1	50080104			0	1	1	35	35	1	1	2	35	2	2	2	3	3	5	5	500801	1	35	0	3	1	2	4	1	5008	500801	50080101	8	1	1	417.175	0	36	431.278	476.102	436.749	433.232	466.689	443.9	443.083	473.958	490.007
792	35	4	1	50080106			1	2	1	35	35	2	1	2	35	3	3	2	2	3	3	3	500801	1	35	0	3	1	2	4	1	5008	500801	50080101	16	1	1	417.175	0	36	541.21	531.755	532.513	503.966	473.113	515.313	540.166	531.053	590.956
792	35	4	1	50080107			1	1	1	35	35	1	1	3	35	3	4	2	2	2	3	5	500801	1	35	0	3	1	2	4	1	5008	500801	50080101	9	1	1	417.175	0	36	620.501	579.47	624.156	608.173	582.511	622.97	575.549	597.484	571.304
792	35	4	1	50080109			0	2	1	35	35	2	2	2	35	2	2	2	2	3	6	5	500801	1	35	0	3	1	2	4	1	5008	500801	50080101	2	1	1	417.175	0	36	323.984	359.436	389.323	343.075	318.259	350.021	289.886	265.366	339.042
792	35	4	1	50080110			0	1	1	35	35	1	2	2	35	2	2	2	2	3	6	5	500801	1	35	0	3	1	2	4	1	5008	500801	50080101	17	1	1	417.175	0	36	466.154	444.092	489.56	459.484	436.316	465.703	479.229	472.095	421.384
792	35	4	1	50080115			0	1	1	35	35	1	1	2	35	1	2	2	3	3	5	5	500801	1	35	0	3	1	2	4	1	5008	500801	50080101	5	1	1	417.175	0	36	459.79	410.519	433.852	428.978	466.606	478.755	438.007	450.165	406.484
792	35	4	1	50080116			1	1	1	35	35	1	1	2	35	1	1	3	3	3	6	5	500801	1	35	0	3	1	2	4	1	5008	500801	50080101	11	1	1	417.175	0	36	315.15	209.029	286.129	286.397	253.954	279.174	230.7	284.66	237.571
792	35	4	1	50080118			0	2	1	35	35	2	2	2	35	1	1	3	3	3	5	5	500801	1	35	0	3	1	2	4	1	5008	500801	50080101	6	1	1	417.175	0	36	294.311	362.757	318.465	340.733	326.408	322.377	258.829	305.382	330.258
792	35	4	3	50090201			1	2	1	35	35	2	1	3	35	1	1	3	3	2	5	4	500901	1	35	0	3	1	2	4	1	5009	500902	50090101	1	1	1	200.797	1	59	542.316	621.125	609.278	619.43	612.407	564.224	609.057	586.127	533.84
792	35	4	3	50090202			0	1	1	35	35	1	1	3	35	1	4	2	2	2	4	3	500901	1	35	0	3	1	2	4	1	5009	500902	50090101	2	1	1	200.797	1	59	395.131	373.541	356.673	322.231	337.902	416.588	384.373	363.213	403.089
792	35	4	3	50090203			0	1	1	35	35	1	1	3	35	3	2	2	3	2	5	5	500901	1	35	0	3	1	2	4	1	5009	500902	50090101	3	1	1	200.797	1	59	511.477	504.584	499.734	524.787	500.845	542.829	509.855	500.355	555.471
792	35	4	3	50090204			0	2	1	35	35	2	1	2	35	3	4	2	2	2	4	5	500901	1	35	0	3	1	2	4	1	5009	500902	50090101	4	1	1	200.797	1	59	513.643	451.751	515.384	470.406	513.924	428.486	463.505	408.32	457.082
792	35	4	3	50090205			0	2	1	35	35	2	1	3	35	5	5	2	1	1	1	2	500901	1	35	0	3	1	2	4	1	5009	500902	50090101	5	1	1	200.797	1	59	543.85	543.378	525.466	536.293	564.81	573.742	504.152	564.105	510.525
792	35	4	3	50090206			1	2	1	35	35	2	1	3	35	3	3	2	2	1	3	4	500901	1	35	0	3	1	2	4	1	5009	500902	50090101	6	1	1	200.797	1	59	531.531	510.387	573.605	578.084	581.565	515.09	534.051	584.216	540.68
792	35	4	3	50090207			0	2	1	35	35	2	1	3	35	3	3	2	2	2	4	6	500901	1	35	0	3	1	2	4	1	5009	500902	50090101	7	1	1	200.797	1	59	491.014	531.247	506.33	510.053	479.111	509.342	465.363	517.456	493.753
792	35	4	3	50090208			0	2	1	35	35	2	2	2	35	3	2	2	2	2	1	2	500901	1	35	0	3	1	2	4	1	5009	500902	50090101	8	1	1	200.797	1	59	518.201	472.695	495.518	493.955	511.738	522.933	494.743	519.733	532.106
792	35	4	3	50090209			0	2	1	35	35	2	3	2	35	4	4	2	1	2	1	3	500901	1	35	0	3	1	2	4	1	5009	500902	50090101	16	1	1	200.797	1	59	426.552	483.359	484.577	472.701	496.558	472.335	403.294	400.258	421.323
792	35	4	3	50090210			1	2	1	35	35	2	2	3	35	9	9	9	9	9	9	9	500901	1	35	0	3	1	2	4	1	5009	500902	50090101	9	1	1	200.797	1	59	505.592	563.223	519.392	537.847	540.988	539.759	518.15	474.495	523.368
792	35	4	3	50090211			0	1	1	35	35	1	1	3	35	4	5	2	2	3	3	3	500901	1	35	0	3	1	2	4	1	5009	500902	50090101	17	1	1	200.797	1	59	476.444	501.769	507.517	516.244	527.777	488.858	503.578	475.941	481.891
792	35	4	3	50090212			0	2	1	35	35	2	1	2	35	3	4	2	2	2	1	3	500901	1	35	0	3	1	2	4	1	5009	500902	50090101	18	1	1	200.797	1	59	543.141	571.806	612.675	519.266	592.812	615.579	600.9	527.911	595.522
792	35	4	3	50090213			1	1	1	35	35	1	1	1	35	3	3	3	3	2	5	5	500901	1	35	0	3	1	2	4	1	5009	500902	50090101	10	1	1	200.797	1	59	425.925	409.691	404.864	439.214	426.662	435.674	440.206	446.164	475.749
792	35	4	3	50090214			0	1	1	35	35	1	1	2	35	2	3	2	2	2	3	5	500901	1	35	0	3	1	2	4	1	5009	500902	50090101	11	1	1	200.797	1	59	448.481	501.923	525.377	467.917	440.997	496.687	441.182	497.289	467.924
792	35	4	3	50090215			0	1	1	35	35	1	1	3	35	3	4	2	2	1	3	5	500901	1	35	0	3	1	2	4	1	5009	500902	50090101	12	1	1	200.797	1	59	540.485	568.033	507.682	572.416	556.595	541.691	544.78	589.212	499.379
792	35	4	3	50090216			1	2	1	35	35	2	1	3	35	5	5	2	1	2	3	3	500901	1	35	0	3	1	2	4	1	5009	500902	50090101	13	1	1	200.797	1	59	496.387	517.96	513.864	533.112	518.567	562.445	511.335	538.077	546.1
792	35	4	3	50090217			0	1	1	35	35	1	1	2	35	3	2	2	3	2	5	5	500901	1	35	0	3	1	2	4	1	5009	500902	50090101	1	1	1	200.797	1	59	572.402	593.549	606.126	608.739	576.108	552.115	602.13	556.524	596.318
792	35	4	3	50090218			0	1	1	35	35	1	2	2	35	2	4	2	2	1	3	4	500901	1	35	0	3	1	2	4	1	5009	500902	50090101	14	1	1	200.797	1	59	437.398	425.126	430.654	402.651	443.338	453.544	414.012	477.259	438.342
792	35	4	3	50090219			0	1	1	35	35	1	1	3	35	2	4	2	2	1	4	6	500901	1	35	0	3	1	2	4	1	5009	500902	50090101	15	1	1	200.797	1	59	547.801	504.554	545.412	502.648	563.803	557.03	529.164	512.047	500.158
792	35	4	3	50090220			1	1	1	35	35	1	1	2	35	3	3	2	3	2	5	6	500901	1	35	0	3	1	2	4	1	5009	500902	50090101	16	1	1	200.797	1	59	534.485	527.98	528.202	581.188	477.621	517.885	517.587	527.227	508.241
792	35	4	3	50090221			0	2	1	35	35	2	2	2	35	2	2	2	3	2	3	6	500901	1	35	0	3	1	2	4	1	5009	500902	50090101	2	1	1	200.797	1	59	394.117	425.874	399.068	438.902	428.047	422.304	408.322	439.952	423.235
792	35	4	3	50090222			1	1	1	35	35	1			35	1	4	9	3	2	4	5	500901	1	35	0	3	1	2	4	1	5009	500902	50090101	3	1	1	200.797	1	59	471.969	458.866	492.723	463.768	481.244	491.16	470.35	440.173	450.211
792	35	4	1	50100201			0	1	1	35	35	1	1	3	35	2	1	2	3	2	4	2	501001	1	35	0	3	1	2	4	1	5010	501002	50100101	11	1	1	181.542	1	51	447.113	459.928	483.487	499.702	439.124	437.032	452.619	428.646	412.912
792	35	4	1	50100203			1	2	1	35	35	2	1	3	35	2	2	2	2	2	2	1	501001	1	35	0	3	1	2	4	1	5010	501002	50100101	3	1	1	181.542	1	51	450.044	440.115	480.934	464.197	519.277	473.526	478.887	482.647	523.901
792	35	4	1	50100206			0	2	1	35	35	2	2	1	35	1	1	3	3	3	5	5	501001	1	35	0	3	1	2	4	1	5010	501002	50100101	6	1	1	181.542	1	51	430.405	483.911	489.113	461.108	486.004	469.349	495.445	502.945	508.375
792	35	4	1	50100207			1	1	1	35	35	1	1	2				9					501001	1	35	0	3	1	2	4	1	5010	501002	50100101	12	1	1	181.542	1	51	423.565	467.134	428.143	442.048	449.696	394.906	430.383	417.641	391.204
792	35	4	1	50100209			0	2	1	35	35	2	2	2				9					501001	1	35	0	3	1	2	4	1	5010	501002	50100101	13	1	1	181.542	1	51	536.645	553.027	495.056	545.316	507.525	529.373	504.477	540.36	575.465
792	35	4	1	50100210			0	1	1	35	35	1	2	2				9					501001	1	35	0	3	1	2	4	1	5010	501002	50100101	8	1	1	181.542	1	51	543.514	555.299	522.581	556.53	610.36	586.526	554.092	541.989	553.796
792	35	4	1	50100211			1	2	1	35	35	2	1	3				9					501001	1	35	0	3	1	2	4	1	5010	501002	50100101	9	1	1	181.542	1	51	545.019	517.432	504.243	535.586	476.261	527.791	473.538	505.606	490.037
792	35	4	1	50100212			0	2	1	35	35	2	2	3	35	1	1	2	3	3	4	5	501001	1	35	0	3	1	2	4	1	5010	501002	50100101	1	1	1	181.542	1	51	554.255	539.925	483.623	531.53	555.489	522.712	565.476	513.601	564.855
792	35	4	1	50100214			0	1	1	35	35	1	1	1	35	1	1	3	3	2	5	5	501001	1	35	0	3	1	2	4	1	5010	501002	50100101	3	1	1	181.542	1	51	418.407	440.078	460.859	419.067	439.31	437.029	473.751	385.413	441.24
792	35	4	1	50100215			0	2	1	35	35	2	2	2	35	2	2	2	3	2	5	3	501001	1	35	0	3	1	2	4	1	5010	501002	50100101	4	1	1	181.542	1	51	544.304	544.753	523.012	563.113	540.194	504.843	485.841	530.507	533.92
792	35	4	1	50100216			0	2	1	35	35	2	2	1				9					501001	1	35	0	3	1	2	4	1	5010	501002	50100101	5	1	1	181.542	1	51	430.35	390.483	412.602	437.849	433.938	429.943	414.486	492.618	441.757
792	35	4	1	50100217			1	2	1	35	35	2	1	3	35	2	2	2	2	2	2	1	501001	1	35	0	3	1	2	4	1	5010	501002	50100101	6	1	1	181.542	1	51	561.876	578.807	537.533	544.211	550.685	545.198	541.232	516.778	535.748
792	35	4	1	50100218			1	1	1	35	35	1	1	3	35	4	3	2	2	2	3	1	501001	1	35	0	3	1	2	4	1	5010	501002	50100101	14	1	1	181.542	1	51	504.543	513.376	530.82	479.75	521.623	508.702	477.812	525.465	512.95
792	35	4	1	50100219			0	2	1	35	35	2	1	3	35	2	2	2	3	2	3	5	501001	1	35	0	3	1	2	4	1	5010	501002	50100101	15	1	1	181.542	1	51	494.007	455.269	460.4	491.357	459.474	380.116	439.111	428.242	493.014
792	35	4	1	50100220			0	1	1	35	35	1	2	1				9					501001	1	35	0	3	1	2	4	1	5010	501002	50100101	7	1	1	181.542	1	51	394.167	418.26	355.455	408.602	417.196	383.931	408.141	398.45	351.674
792	35	4	1	50100221			0	1	1	35	35	1	1	2				9					501001	1	35	0	3	1	2	4	1	5010	501002	50100101	8	1	1	181.542	1	51	468.292	459.55	494.994	481.237	473.347	481.714	449.866	506.426	441.939
792	35	4	1	50100222			0	2	1	35	35	2	1	3	35	2	2	2	3	2	5	5	501001	1	35	0	3	1	2	4	1	5010	501002	50100101	16	1	1	181.542	1	51	530.94	489.531	537.968	473.902	502.496	496.419	491.861	545.023	409.377
792	35	4	1	50100225			0	2	2	35	35	2	2	2				9					501001	1	35	0	3	1	2	4	1	5010	501002	50100101	9	1	1	181.542	1	51	447.334	478.517	460.057	410.628	446.469	413.201	417.686	429.612	433.752
792	35	4	1	50100230			0	2	2	35	35	2	1	3	35	1	1	2	3	3	5	5	501001	1	35	0	3	1	2	4	1	5010	501002	50100101	13	1	1	181.542	1	51	375.122	355.119	302.892	407.082	346.246	350.636	347.413	354.518	422.472
792	35	4	1	50100232			0	2	2	35	35	2	1	3	35	1	1	3	3	2	5	5	501001	1	35	0	3	1	2	4	1	5010	501002	50100101	14	1	1	181.542	1	51	484.956	463.516	480.752	519.309	545.117	455.897	509.191	524.054	534.551
792	35	4	1	50100234			0	1	2	35	35	1	1	1	35	1	1	3	3	2	4	5	501001	1	35	0	3	1	2	4	1	5010	501002	50100101	16	1	1	181.542	1	51	386.982	485.061	486.582	479.691	495.087	519.451	460.44	451.863	450.012
792	35	4	1	50100237			1	1	2	35	35	1	1	3				9					501001	1	35	0	3	1	2	4	1	5010	501002	50100101	17	1	1	181.542	1	51	340.308	399.252	425.078	428.408	428.763	387.306	400.555	396.713	380.466
792	35	4	1	50100238			0	1	2	35	35	1	2	3				9					501001	1	35	0	3	1	2	4	1	5010	501002	50100101	3	1	1	181.542	1	51	402.347	425.876	448.406	413.956	416.138	443.695	445.011	485.556	409.38
792	35	4	1	50100241			1	1	2	35	35	1	2	3	35	3	2	2	2	2	3	3	501001	1	35	0	3	1	2	4	1	5010	501002	50100101	10	1	1	181.542	1	51	553.904	626.071	592.251	549.196	546.054	499.71	496.856	552.787	518.053
792	35	4	1	50101301			0	1	1	35	35	1	1	3				9					501002	2	35	0	2	1	2	4	1	5010	501013	50100202	6	1	1	191.709	1	51	563.701	549.121	522.278	592.974	537.438	565.611	543.058	542.226	571.828
792	35	4	1	50101302			1	2	1	35	35	2	2	2				9					501002	2	35	0	2	1	2	4	1	5010	501013	50100202	7	1	1	191.709	1	51	396.414	350.654	388.718	367.526	259.978	383.586	309.023	417.575	306.13
792	35	4	1	50101303			0	1	1	35	35	1	2	2				9					501002	2	35	0	2	1	2	4	1	5010	501013	50100202	14	1	1	191.709	1	51	353.33	362.054	330.681	382.109	355.694	360.434	398.672	381.793	341.005
792	35	4	1	50101304			1	1	1	35	35	1	1	3				9					501002	2	35	0	2	1	2	4	1	5010	501013	50100202	8	1	1	191.709	1	51	376.446	337.859	393.616	410.892	424.57	369.854	429.401	375.644	282.762
792	35	4	1	50101305			1	1	1	35	35	1	1	3	35	3	2	2	2	2	5	2	501002	2	35	0	2	1	2	4	1	5010	501013	50100202	9	1	1	191.709	1	51	465.047	404.883	391.42	453.676	453.886	458.315	392.595	456.616	425.586
792	35	4	1	50101306			1	1	1	35	35	1	1	3				9					501002	2	35	0	2	1	2	4	1	5010	501013	50100202	1	1	1	191.709	1	51	439.259	418.577	410.554	450.412	420.568	405.5	371.517	407.334	369.013
792	35	4	1	50101307			0	1	1	35	35	1	1	3	35	2	1	2	3	2	4	5	501002	2	35	0	2	1	2	4	1	5010	501013	50100202	15	1	1	191.709	1	51	439.717	499.713	476.345	509.119	476.93	451.242	448.133	531.727	521.381
792	35	4	1	50101308			1	1	1	35	35	1	1	2	35	2	1	2	3	2	5	2	501002	2	35	0	2	1	2	4	1	5010	501013	50100202	16	1	1	191.709	1	51	451.945	447.655	431.747	422.51	483.069	471.271	459.887	490.498	499.729
792	35	4	1	50101309			0	2	1	35	35	2	2	3	35	3	2	2	3	3	5	3	501002	2	35	0	2	1	2	4	1	5010	501013	50100202	17	1	1	191.709	1	51	447.644	428.676	446.423	457.858	410.391	430.811	427.79	441.143	385.203
792	35	4	1	50101310			0	2	1	35	35	2	1	2				9					501002	2	35	0	2	1	2	4	1	5010	501013	50100202	2	1	1	191.709	1	51	476.669	485.741	481.339	458.52	527.689	447.672	499.791	499.743	481.068
792	35	4	1	50101313			0	2	1	35	35	2	1	2	35	2	2	2	3	2	5	5	501002	2	35	0	2	1	2	4	1	5010	501013	50100202	10	1	1	191.709	1	51	571.257	564.298	590.487	561.62	572.326	522.982	530.152	577.159	571.233
792	35	4	1	50101315			0	1	1	35	35	1	1	2				9					501002	2	35	0	2	1	2	4	1	5010	501013	50100202	11	1	1	191.709	1	51	478.886	428.912	481.701	436.86	437.797	422.368	494.507	443.808	456.985
792	35	4	1	50101317			1	1	1	35	35	1	2	2	35	3	2	2	3	1	4	5	501002	2	35	0	2	1	2	4	1	5010	501013	50100202	13	1	1	191.709	1	51	517.469	544.235	517.679	513.937	566.067	508.735	524.097	565.914	495.407
792	35	4	1	50101319			0	1	1	35	35	1	1	2	35	2	1	2	3	2	5	5	501002	2	35	0	2	1	2	4	1	5010	501013	50100202	6	1	1	191.709	1	51	484.033	467.354	454.144	459.208	457.03	427.082	463.882	456.833	446.884
792	35	4	1	50101320			0	1	1	35	35	1	1	2				9					501002	2	35	0	2	1	2	4	1	5010	501013	50100202	14	1	1	191.709	1	51	545.802	522.779	562.328	552.497	516.581	541.419	512.661	492.942	521.641
792	35	4	1	50101321			0	1	1	35	35	1	1	3				9					501002	2	35	0	2	1	2	4	1	5010	501013	50100202	15	1	1	191.709	1	51	558.572	542.635	497.389	534.947	514.16	551.041	573.215	521.556	551.316
792	35	4	1	50101322			0	1	1	35	35	1	2	2				9					501002	2	35	0	2	1	2	4	1	5010	501013	50100202	7	1	1	191.709	1	51	512.969	521.975	488.027	473.308	474.622	475.712	477.986	516.276	414.43
792	35	4	1	50101324			0	2	2	35	35	2	1	1	35	2	2	2	3	3	3	4	501002	2	35	0	2	1	2	4	1	5010	501013	50100202	8	1	1	191.709	1	51	527.976	497.315	512.37	490.005	510.639	524.914	444.202	513.774	471.307
792	35	4	1	50101326			0	2	2	35	35	2	1	2	35	3	2	3	3	2	5	5	501002	2	35	0	2	1	2	4	1	5010	501013	50100202	18	1	1	191.709	1	51	514.88	491.749	481.963	507.792	484.507	576.434	517.147	458.405	562.906
792	35	4	1	50101327			0	1	2	35	35	1	9	3	35	3	2	2	3	3	5	5	501002	2	35	0	2	1	2	4	1	5010	501013	50100202	9	1	1	191.709	1	51	388.919	409.655	431.08	397.076	384.077	456.38	362.002	420.572	440.293
792	35	4	1	50101328			0	1	2	35	35	1	1	2				9					501002	2	35	0	2	1	2	4	1	5010	501013	50100202	10	1	1	191.709	1	51	451.474	462.464	455.149	444.573	450.57	423.419	424.375	515.759	447.448
792	35	4	1	50101330			0	2	2	35	35	2	1	1	35	2	1	3	3	2	5	2	501002	2	35	0	2	1	2	4	1	5010	501013	50100202	11	1	1	191.709	1	51	530.963	516.692	520.417	483.368	515.678	530.71	543.945	492.065	537.562
792	35	4	1	50101331			0	2	2	35	35	2	2	3	35	5	5	2	1	1	1	1	501002	2	35	0	2	1	2	4	1	5010	501013	50100202	12	1	1	191.709	1	51	510.505	458.836	481.257	492.817	485.865	527.307	554.856	459.774	497.296
792	35	4	1	50101337			0	1	2	35	35	1	1	2				9					501002	2	35	0	2	1	2	4	1	5010	501013	50100202	13	1	1	191.709	1	51	530.256	588.539	524.307	562.474	496.61	570.383	535.045	619.591	586.752
792	35	4	1	50101338			0	2	2	35	35	2	1	3				9					501002	2	35	0	2	1	2	4	1	5010	501013	50100202	7	1	1	191.709	1	51	407.109	451.858	387.379	444.053	445.803	379.807	391.1	407.433	412.197
792	35	1	4	50110201			0	2	1	35	35	2	1	1	35	2	4	2	2	2	1	3	501101	1	35	0	3	1	2	4	1	5011	501102	50110101	18	1	1	196.647	0	69	500.35	551.606	537.336	531.424	574.142	509.973	465.482	573.804	526.934
792	35	1	4	50110203			0	1	1	35	35	1	2	3	35	4	4	2	2	2	3	4	501101	1	35	0	3	1	2	4	1	5011	501102	50110101	11	1	1	196.647	0	69	514.065	490.908	554.034	571.601	565.712	531.81	586.433	537.193	510.724
792	35	1	4	50110204			0	1	1	35	35	1	1	3	35	3	3	2	2	2	3	3	501101	1	35	0	3	1	2	4	1	5011	501102	50110101	6	1	1	196.647	0	69	489.29	500.033	482.836	498.843	541.642	464.743	447.077	500.063	481.483
792	35	1	4	50110205			0	1	1	35	35	1	1	2	35	1	3	2	2	2	2	3	501101	1	35	0	3	1	2	4	1	5011	501102	50110101	7	1	1	196.647	0	69	508.102	546.064	554.131	532.328	556.873	544.8	553.12	524.471	490.446
792	35	1	4	50110206			0	1	1	35	35	1	2	3	35	1	1	2	3	3	1	4	501101	1	35	0	3	1	2	4	1	5011	501102	50110101	8	1	1	196.647	0	69	527.598	554.939	519.559	504.857	500.168	535.775	532.445	543.445	501.293
792	35	1	4	50110207			1	2	1	35	35	2	2	2	35	5	5	2	1	2	1	2	501101	1	35	0	3	1	2	4	1	5011	501102	50110101	9	1	1	196.647	0	69	517.944	529.022	564.065	527.172	556.434	521.957	547.684	541.737	551.681
792	35	1	4	50110208			0	1	1	35	35	1	2	2	35	4	4	2	2	2	3	5	501101	1	35	0	3	1	2	4	1	5011	501102	50110101	1	1	1	196.647	0	69	584.014	555.617	545.395	573.575	580.356	585.021	575.069	592.606	564.003
792	35	1	4	50110209			1	2	1	35	35	2	1	3	35	2	4	1	2	2	1	3	501101	1	35	0	3	1	2	4	1	5011	501102	50110101	2	1	1	196.647	0	69	395.549	447.722	445.746	451.382	417.611	458.623	429.194	406.519	443.977
792	35	1	4	50110210			1	1	1	35	35	1	1	2	35	3	4	1	1	2	1	1	501101	1	35	0	3	1	2	4	1	5011	501102	50110101	12	1	1	196.647	0	69	598.564	528.037	537.512	605.152	550.793	569.638	590.637	561.056	615.655
792	35	1	4	50110211			0	1	1	35	35	1	2	3	35	4	5	1	1	3	2	3	501101	1	35	0	3	1	2	4	1	5011	501102	50110101	3	1	1	196.647	0	69	582.799	593.755	543.845	584.763	569.879	591.712	578.324	520.504	520.325
792	35	1	4	50110212			0	2	1	35	35	2	2	3	35	3	5	1	1	2	1	1	501101	1	35	0	3	1	2	4	1	5011	501102	50110101	13	1	1	196.647	0	69	602.307	618.245	600.381	632.672	567.626	557.862	690.938	689.33	650.86
792	35	1	4	50110213			0	1	1	35	35	1	2	2	35	2	3	2	2	2	1	1	501101	1	35	0	3	1	2	4	1	5011	501102	50110101	14	1	1	196.647	0	69	594.314	565.149	550.936	557.774	556.913	573.405	504.638	579.371	545.79
792	35	1	4	50110215			0	1	1	35	35	1	2	3	35	4	4	2	1	2	2	2	501101	1	35	0	3	1	2	4	1	5011	501102	50110101	4	1	1	196.647	0	69	674.958	779.787	696.354	719.001	695.468	743.08	640.842	736.495	724.736
792	35	1	4	50110216			0	2	1	35	35	2	2	3	35	5	5	1	1	2	1	1	501101	1	35	0	3	1	2	4	1	5011	501102	50110101	5	1	1	196.647	0	69	476.406	447.775	479.044	467.195	457.759	488.598	492.441	427.193	443.805
792	35	1	4	50110217			1	2	1	35	35	2	2	3	35	4	3	2	2	2	1	3	501101	1	35	0	3	1	2	4	1	5011	501102	50110101	6	1	1	196.647	0	69	521.577	492.484	499.801	458.611	482.682	493.296	496.375	513.769	476.547
792	35	1	4	50110218			0	2	1	35	35	2	2	2	35	5	5	1	1	1	1	3	501101	1	35	0	3	1	2	4	1	5011	501102	50110101	16	1	1	196.647	0	69	571.495	620.11	530.513	630.441	639.997	613.745	633.595	575.815	740.264
792	35	1	4	50110219			0	2	1	35	35	2	2	3	35	5	5	2	1	2	4	9	501101	1	35	0	3	1	2	4	1	5011	501102	50110101	17	1	1	196.647	0	69	415.02	489.544	463.015	477.72	501.75	463.089	463.427	489.505	443.188
792	35	1	4	50110220			1	2	1	35	35	2	2	3	35	3	4	2	2	1	1	3	501101	1	35	0	3	1	2	4	1	5011	501102	50110101	18	1	1	196.647	0	69	545.991	483.459	540.089	557.117	472.037	519.251	494.009	544.284	509.374
792	35	4	1	50120301			0	2	1	35	35	2	2	2	35	3	3	2	2	2	4	5	501201	1	35	0	3	1	2	4	1	5012	501203	50120101	13	1	1	369.286	1	77	387.251	366.588	381.586	349.939	315.712	377.075	355.591	363.765	388.415
792	35	4	1	50120302			1	1	1	35	35	1	1	1	35	3	3	3	3	2	5	6	501201	1	35	0	3	1	2	4	1	5012	501203	50120101	14	1	1	369.286	1	77	410.735	373.243	366.807	387.431	396.344	419.947	423.037	384.861	380.574
792	35	4	1	50120303			0	1	1	35	35	1	1	2				9					501201	1	35	0	3	1	2	4	1	5012	501203	50120101	9	1	1	369.286	1	77	484.799	497.216	483.946	461.017	516.38	480.04	496.617	522.402	474.572
792	35	4	1	50120304			0	2	1	35	35	2	1	2	35	3	3	2	3	2	5	6	501201	1	35	0	3	1	2	4	1	5012	501203	50120101	15	1	1	369.286	1	77	577.541	499.615	503	524.883	490.15	544.047	521.011	551.621	466.241
792	35	4	1	50120305			1	2	1	35	35	2	1	2	35	4	1	2	2	2	4	7	501201	1	35	0	3	1	2	4	1	5012	501203	50120101	16	1	1	369.286	1	77	490.737	526.672	486.256	529.217	532.66	574.327	492.17	499.184	471.069
792	35	4	1	50120306			0	2	1	35	35	2	1	1	35	3	3	2	3	2	5	5	501201	1	35	0	3	1	2	4	1	5012	501203	50120101	1	1	1	369.286	1	77	399.059	412.077	453.761	406.745	390.765	367.989	361.662	458.708	320.636
792	35	4	1	50120308			1	1	1	35	35	1	2	3	35	4	3	2	2	1	3	2	501201	1	35	0	3	1	2	4	1	5012	501203	50120101	2	1	1	369.286	1	77	411.06	441.202	426.983	417.141	400.93	486.961	454.599	432.639	416.548
792	35	4	1	50120310			1	2	1	35	35	2	1	2				9					501201	1	35	0	3	1	2	4	1	5012	501203	50120101	4	1	1	369.286	1	77	523.901	499.706	490.555	496.154	463.651	520.512	509.497	529.736	476.679
792	35	4	1	50120312			0	1	1	35	35	1	1	3	35	5	5	1	1	2	3	2	501201	1	35	0	3	1	2	4	1	5012	501203	50120101	5	1	1	369.286	1	77	539.281	560.474	579.868	546.582	569.374	572.315	515.047	567.119	599.963
792	35	4	1	50120313			0	1	1	35	35	1	1	3	35	5	5	2	1	2	3	3	501201	1	35	0	3	1	2	4	1	5012	501203	50120101	6	1	1	369.286	1	77	492.59	564.799	495.261	572.087	549.792	524.435	530.834	555.59	549.3
792	35	4	1	50120314			0	2	1	35	35	2	1	2	35	3	3	2	3	3	5	6	501201	1	35	0	3	1	2	4	1	5012	501203	50120101	7	1	1	369.286	1	77	400.061	375.775	502.2	363.199	406.913	441.861	369.15	351.913	343.907
792	35	4	1	50120315			0	2	1	35	35	2	1	3	35	3	3	2	2	3	3	5	501201	1	35	0	3	1	2	4	1	5012	501203	50120101	10	1	1	369.286	1	77	488.452	485.101	492.107	494.22	475.372	447.363	512.64	532.992	456.369
792	35	4	1	50120316			1	1	1	35	35	1	1	1	35	3	3	2	3	2	5	5	501201	1	35	0	3	1	2	4	1	5012	501203	50120101	8	1	1	369.286	1	77	538.794	524.94	543.917	539.22	512.32	506.037	527.887	602.905	471.977
792	35	4	1	50120317			0	1	1	35	35	1	1	2	35	4	5	2	2	2	5	6	501201	1	35	0	3	1	2	4	1	5012	501203	50120101	9	1	1	369.286	1	77	567.466	568.486	533.242	567.099	570.702	510.191	504.424	547.112	569.128
792	35	4	1	50120318			0	1	1	35	35	1	1	3	35	5	5	2	1	1	1	3	501201	1	35	0	3	1	2	4	1	5012	501203	50120101	11	1	1	369.286	1	77	474.372	557.103	542.816	542.425	489.623	481.262	520.585	490.091	490.816
792	35	4	1	50120319			0	1	1	35	35	1	1	3	35	3	4	2	2	2	3	6	501201	1	35	0	3	1	2	4	1	5012	501203	50120101	1	1	1	369.286	1	77	480.907	429.584	479.059	433.332	411.91	442.216	456.272	475	431.943
792	35	4	1	50120320			1	1	1	35	35	1	1	1	35	3	4	2	2	2	3	2	501201	1	35	0	3	1	2	4	1	5012	501203	50120101	12	1	1	369.286	1	77	421.319	397.665	374.502	445.459	406.035	402.247	390.86	365.93	400.124
792	35	4	1	50120321			0	2	1	35	35	2	1	1	35	3	3	2	3	2	5	6	501201	1	35	0	3	1	2	4	1	5012	501203	50120101	13	1	1	369.286	1	77	482.586	403.109	453.243	404.755	450.208	411.873	415.243	501.264	442.896
792	35	4	1	50120323			0	2	1	35	35	2	1	2	35	4	4	2	2	2	3	5	501201	1	35	0	3	1	2	4	1	5012	501203	50120101	14	1	1	369.286	1	77	561.614	618.723	603.571	602.793	612.966	516.459	628.215	583.953	538.896
792	35	4	1	50120324			0	2	1	35	35	2	1	1	35	3	3	3	3	2	5	4	501201	1	35	0	3	1	2	4	1	5012	501203	50120101	15	1	1	369.286	1	77	414.133	356.214	376.333	367.357	393.598	341.174	375.753	313.558	369.171
792	35	4	1	50120325			0	1	1	35	35	1	1	2	35	3	3	2	3	3	5	5	501201	1	35	0	3	1	2	4	1	5012	501203	50120101	16	1	1	369.286	1	77	619.31	579.064	584.145	526.772	604.76	596.511	577.988	626.952	680.19
792	35	4	1	50120326			0	2	1	35	35	2	1	2	35	3	3	2	3	2	5	5	501201	1	35	0	3	1	2	4	1	5012	501203	50120101	3	1	1	369.286	1	77	439.525	487.884	460.329	506.891	528.699	512.031	466.722	434.81	461.745
792	35	4	1	50120327			0	1	1	35	35	1	2	2	35	4	4	2	2	2	4	6	501201	1	35	0	3	1	2	4	1	5012	501203	50120101	4	1	1	369.286	1	77	517.977	532.602	536.303	514.649	566.247	551.215	540.187	548.799	572.064
792	35	2	4	50130201			1	1	1	35	35	1	2	3	35	3	3	2	2	1	3	1	501301	1	35	0	2	1	2	4	1	5013	501302	50130101	17	1	1	185.722	0	92	651.902	581.337	606.921	558.058	579.962	619.568	626.622	541.519	639.676
792	35	2	4	50130202			1	2	1	35	35	2	2	3	35	4	3	2	2	1	2	2	501301	1	35	0	2	1	2	4	1	5013	501302	50130101	5	1	1	185.722	0	92	575.741	522.971	553.878	542.402	499.018	553.673	500.894	539.641	569.039
792	35	2	4	50130203			0	2	1	35	35	2	1	3	35	3	2	2	2	2	4	1	501301	1	35	0	2	1	2	4	1	5013	501302	50130101	18	1	1	185.722	0	92	597.704	555.406	527.552	485.753	505.558	589.615	545.54	614.677	510.402
792	35	2	4	50130204			0	2	1	35	35	2	3	3	35	3	4	2	2	1	1	3	501301	1	35	0	2	1	2	4	1	5013	501302	50130101	6	1	1	185.722	0	92	597.887	577.496	585.21	556.087	520.2	521.974	531.79	554.652	519.589
792	35	2	4	50130205			0	1	1	35	35	1	2	3	35	4	2	2	2	2	3	3	501301	1	35	0	2	1	2	4	1	5013	501302	50130101	10	1	1	185.722	0	92	483.399	524.84	478.897	591.336	501.252	540.007	529.777	509.578	526.162
792	35	2	4	50130206			0	1	1	35	35	1	2	2	35	5	4	2	2	2	3	4	501301	1	35	0	2	1	2	4	1	5013	501302	50130101	7	1	1	185.722	0	92	492.651	491.469	496.539	459.247	501.83	459.751	449.63	477.322	484.429
792	35	2	4	50130207			0	2	1	35	35	2	2	3	35	5	5	1	1	1	1	1	501301	1	35	0	2	1	2	4	1	5013	501302	50130101	11	1	1	185.722	0	92	659.144	643.35	689.386	599.867	684.245	649.886	586.622	621.255	671.719
792	35	2	4	50130208			0	2	1	35	35	2	2	3	35	3	3	2	2	1	1	3	501301	1	35	0	2	1	2	4	1	5013	501302	50130101	12	1	1	185.722	0	92	540.035	509.102	497.494	487.066	545.414	518.308	478.544	493.697	478.012
792	35	2	4	50130209			1	1	1	35	35	1	1	2	35	3	4	2	2	2	3	2	501301	1	35	0	2	1	2	4	1	5013	501302	50130101	8	1	1	185.722	0	92	516.832	542.562	536.222	523.145	516.175	511.65	531.158	512.173	531.337
792	35	2	4	50130210			0	1	1	35	35	1	3	3	35	4	3	2	2	2	1	3	501301	1	35	0	2	1	2	4	1	5013	501302	50130101	9	1	1	185.722	0	92	657.425	591.216	690.435	643.548	676.876	666.949	645.732	606.65	640.579
792	35	2	4	50130211			0	1	1	35	35	1	1	3	35	2	2	2	2	2	1	1	501301	1	35	0	2	1	2	4	1	5013	501302	50130101	1	1	1	185.722	0	92	569.385	682.192	558.135	656.002	654.146	693.489	656.774	592.44	646.206
792	35	2	4	50130212			1	2	1	35	35	2	2	3	35	5	4	1	1	1	1	1	501301	1	35	0	2	1	2	4	1	5013	501302	50130101	13	1	1	185.722	0	92	631.394	631.038	619.438	642.963	616.352	536.159	549.809	588.816	620.976
792	35	4	2	50140202			0	2	1	35	35	2	1	3	35	1	1	2	3	1	4	3	501401	1	35	0	2	1	2	4	1	5014	501402	50140101	10	1	1	131.563	0	38	543.909	545.958	513.308	527.387	526.643	479.17	564.075	555.859	543.272
792	35	4	2	50140204			0	1	1	35	35	1	3	3				9					501401	1	35	0	2	1	2	4	1	5014	501402	50140101	11	1	1	131.563	0	38	403.74	384.527	426.082	449.867	360.597	460.722	409.613	386.162	404.442
792	35	4	2	50140206			0	1	1	35	35	1	1	2	35	3	2	2	2	1	2	3	501401	1	35	0	2	1	2	4	1	5014	501402	50140101	12	1	1	131.563	0	38	476.928	487.265	471.13	534.151	456.023	466.834	463.254	480.125	503.289
792	35	4	2	50140208			1	2	1	35	35	2	1	3	35	2	3	2	3	2	5	5	501401	1	35	0	2	1	2	4	1	5014	501402	50140101	14	1	1	131.563	0	38	387.765	458.404	418.05	429.277	425.481	465.82	406.676	433.34	446.01
792	35	4	2	50140209			0	1	1	35	35	1	1	3	35	1	1	2	3	3	4	6	501401	1	35	0	2	1	2	4	1	5014	501402	50140101	4	1	1	131.563	0	38	433.557	380.111	351.285	385.822	367.553	403.126	308.977	461.701	339.345
792	35	4	2	50140212			1	2	1	35	35	2	2	3				9					501401	1	35	0	2	1	2	4	1	5014	501402	50140101	5	1	1	131.563	0	38	504.62	522.399	522.71	523.247	606.668	508.512	528.046	475.5	520.821
792	35	4	2	50140213			0	1	1	35	35	1	1	3	35	3	3	2	2	2	3	1	501401	1	35	0	2	1	2	4	1	5014	501402	50140101	16	1	1	131.563	0	38	528.943	498.509	532.96	508.267	502.684	495.938	485.913	493.262	487.166
792	35	4	2	50140214			0	1	1	35	35	1	1	3	35	3	3	2	2	2	3	4	501401	1	35	0	2	1	2	4	1	5014	501402	50140101	17	1	1	131.563	0	38	444.253	478.61	459.85	446.029	496.262	463.384	474.354	430.75	423.729
792	35	4	2	50140215			0	1	1	35	35	1	1	3	35	2	4	2	2	3	2	1	501401	1	35	0	2	1	2	4	1	5014	501402	50140101	18	1	1	131.563	0	38	505.706	515.017	525.22	516.439	544.46	497.684	477.357	547.451	505.215
792	35	4	2	50140216			0	2	1	35	35	2	2	3	35	3	3	2	2	3	4	4	501401	1	35	0	2	1	2	4	1	5014	501402	50140101	10	1	1	131.563	0	38	520.954	532.292	558.427	584.079	536.757	526.653	557.958	509.299	528.944
792	35	4	2	50140217			0	2	1	35	35	2	1	3	35	3	2	2	3	2	4	4	501401	1	35	0	2	1	2	4	1	5014	501402	50140101	6	1	1	131.563	0	38	404.134	439.071	430.433	435.451	512.494	429.947	454.505	437.806	469.763
792	35	4	2	50140218			1	1	1	35	35	1	2	2	35	4	4	2	2	1	1	4	501401	1	35	0	2	1	2	4	1	5014	501402	50140101	7	1	1	131.563	0	38	532.645	502.077	590.965	539.637	551.378	546.036	495.653	552.605	536.329
792	35	4	2	50140221			1	2	1	35	35	2	2	3	35	3	3	2	2	1	4	3	501401	1	35	0	2	1	2	4	1	5014	501402	50140101	11	1	1	131.563	0	38	469.117	464.015	469.588	544.869	506.567	495.937	502.052	473.025	481.792
792	35	4	2	50140222			0	2	1	35	35	2	1	2	35	3	2	2	3	2	5	4	501401	1	35	0	2	1	2	4	1	5014	501402	50140101	1	1	1	131.563	0	38	498.772	579.909	566.172	536.692	553.108	608.22	559.503	585.413	527.344
792	35	4	2	50140223			0	2	1	35	35	2	1	3	35	5	3	2	2	1	3	5	501401	1	35	0	2	1	2	4	1	5014	501402	50140101	12	1	1	131.563	0	38	636.39	587.045	619.275	562.672	616.155	557.798	548.264	615.213	592.832
792	35	4	2	50140224			0	2	1	35	35	2	3	3	35	2	9	2	3	2	3	4	501401	1	35	0	2	1	2	4	1	5014	501402	50140101	2	1	1	131.563	0	38	505.138	520.722	532.192	497.471	540.963	537.475	479.953	517.11	508.92
792	35	4	2	50140225			0	2	1	35	35	2	3	2	35	3	2	2	2	1	2	3	501401	1	35	0	2	1	2	4	1	5014	501402	50140101	13	1	1	131.563	0	38	480.904	554.678	479.489	529.457	505.331	512.474	558.384	509.454	516.544
792	35	4	2	50140226			0	1	1	35	35	1	1	3	35	2	2	2	3	2	3	4	501401	1	35	0	2	1	2	4	1	5014	501402	50140101	3	1	1	131.563	0	38	513.914	497.102	507.296	504.106	433.821	499.647	471.27	518.844	510.683
792	35	4	2	50140227			1	1	1	35	35	1	1	3	35	1	5	2	2	3	3	4	501401	1	35	0	2	1	2	4	1	5014	501402	50140101	4	1	1	131.563	0	38	506.787	488.222	511.447	490.606	513.674	508.304	515.583	440.29	493.962
792	35	4	2	50140229			0	2	1	35	35	2	3	3				9					501401	1	35	0	2	1	2	4	1	5014	501402	50140101	5	1	1	131.563	0	38	357.184	308.795	290.775	344.236	368.674	331.652	331.548	302.454	352.672
792	35	4	2	50140230			0	2	1	35	35	2	1	3	35	2	1	2	3	2	3	4	501401	1	35	0	2	1	2	4	1	5014	501402	50140101	6	1	1	131.563	0	38	460.036	470.119	486.709	442.884	484.891	435.732	450.819	425.869	449.12
792	35	4	2	50140231			0	2	1	35	35	2	1	3	35	2	2	2	3	1	3	5	501401	1	35	0	2	1	2	4	1	5014	501402	50140101	7	1	1	131.563	0	38	514.433	523.77	541.721	533.317	533.724	513.194	509.193	518.44	490.933
792	35	4	2	50140232			0	2	1	35	35	2	1	3	35	1	4	2	3	1	5	4	501401	1	35	0	2	1	2	4	1	5014	501402	50140101	15	1	1	131.563	0	38	579.538	523.695	528.079	513.235	588.497	556.417	578.067	594.024	593.68
792	35	4	2	50140501			0	2	1	35	35	2	2	3	35	3	4	2	2	1	5	5	501402	2	35	0	3	1	2	4	1	5014	501405	50140202	9	1	1	133.142	0	38	433.231	391.513	464.912	455.223	423.018	382.903	456.044	449.703	414.453
792	35	4	2	50140502			0	2	1	35	35	2	1	2	35	3	3	2	2	1	5	2	501402	2	35	0	3	1	2	4	1	5014	501405	50140202	1	1	1	133.142	0	38	364.057	353.961	322.657	372.817	360.405	359.071	406.104	451.832	369.426
792	35	4	2	50140503			0	2	1	35	35	2	2	1				9					501402	2	35	0	3	1	2	4	1	5014	501405	50140202	16	1	1	133.142	0	38	388.601	386.209	394.255	304.299	370.014	339.606	387.159	389.908	440.925
792	35	4	2	50140504			0	1	1	35	35	1	1	3	35	4	3	2	2	2	1	3	501402	2	35	0	3	1	2	4	1	5014	501405	50140202	17	1	1	133.142	0	38	489.459	509.664	541.498	512.97	501.943	506.127	500.271	507.447	507.859
792	35	4	2	50140505			1	1	1	35	35	1	1	2	35	4	4	2	2	2	3	3	501402	2	35	0	3	1	2	4	1	5014	501405	50140202	18	1	1	133.142	0	38	513.891	478.49	457.534	483.279	541.289	492.396	484.402	459.227	454.236
792	35	4	2	50140507			0	1	1	35	35	1	1	3	35	3	4	2	2	2	1	3	501402	2	35	0	3	1	2	4	1	5014	501405	50140202	2	1	1	133.142	0	38	485.412	522.179	518.575	515.282	484.579	554.91	525.064	502.477	534.738
792	35	4	2	50140509			1	2	1	35	35	2	1	3	35			9					501402	2	35	0	3	1	2	4	1	5014	501405	50140202	3	1	1	133.142	0	38	458.251	427.532	471.45	443.269	442.554	394.892	415.397	390.487	370.303
792	35	4	2	50140510			0	1	1	35	35	1	2	2	35	3	4	2	2	2	3	2	501402	2	35	0	3	1	2	4	1	5014	501405	50140202	12	1	1	133.142	0	38	541.72	570.515	555.856	562.982	580.741	580.512	537.263	547.373	573.888
792	35	4	2	50140511			0	2	1	35	35	2	1	9	35	3	4	2	2	1	1	3	501402	2	35	0	3	1	2	4	1	5014	501405	50140202	4	1	1	133.142	0	38	567.224	612.631	611.853	597.278	585.113	609.727	569.841	556.315	566.763
792	35	4	2	50140513			0	1	1	35	35	1	2	2	35	4	4	2	1	1	1	1	501402	2	35	0	3	1	2	4	1	5014	501405	50140202	13	1	1	133.142	0	38	526.149	553.195	508.757	500.269	498.76	495.203	473.827	483.645	508.279
792	35	4	2	50140515			0	1	1	35	35	1	2	3	35	1	4	2	2	2	3	5	501402	2	35	0	3	1	2	4	1	5014	501405	50140202	7	1	1	133.142	0	38	527.214	539.437	535.899	499.541	580.951	619.017	561.863	498.432	553.948
792	35	4	2	50140516			0	1	1	35	35	1	1	2	35			9					501402	2	35	0	3	1	2	4	1	5014	501405	50140202	14	1	1	133.142	0	38	421.93	362.275	314.17	374.945	339.627	423.923	358.913	348.457	313.667
792	35	4	2	50140518			1	2	1	35	35	2	1	1	35	3	2	2	2	2	4	3	501402	2	35	0	3	1	2	4	1	5014	501405	50140202	8	1	1	133.142	0	38	493.468	482.37	432.343	445.301	456.484	483.613	426.272	476.542	499.119
792	35	4	2	50140519			1	1	1	35	35	1	1	2	35	3	4	2	2	1	3	1	501402	2	35	0	3	1	2	4	1	5014	501405	50140202	16	1	1	133.142	0	38	487.565	532.448	495.539	523.241	514.2	556.753	542.029	459.49	552.043
792	35	4	2	50140520			0	2	1	35	35	2	1	2	35	3	3	2	2	2	4	1	501402	2	35	0	3	1	2	4	1	5014	501405	50140202	9	1	1	133.142	0	38	558.774	570.022	550.66	560.84	563.627	535.151	623.049	645.627	596.617
792	35	4	2	50140521			1	1	1	35	35	1	1	1	35	2	3	3	3	2	5	4	501402	2	35	0	3	1	2	4	1	5014	501405	50140202	1	1	1	133.142	0	38	465.676	413.935	430.763	454.853	488.957	504.197	465.555	513.53	481.33
792	35	4	2	50140522			0	1	1	35	35	1	2	3	35	3	3	2	2	1	3	3	501402	2	35	0	3	1	2	4	1	5014	501405	50140202	2	1	1	133.142	0	38	505.686	514.946	526.63	498.309	516.009	515.83	490.884	527.837	488.716
792	35	4	2	50140523			0	1	1	35	35	1	1	2				9					501402	2	35	0	3	1	2	4	1	5014	501405	50140202	17	1	1	133.142	0	38	486.256	431.845	506.787	500.972	445.798	474.797	452.715	483.995	489.894
792	35	4	2	50140524			0	1	1	35	35	1	2	2				9					501402	2	35	0	3	1	2	4	1	5014	501405	50140202	3	1	1	133.142	0	38	415.368	384.354	399.051	470.281	405.405	477.106	382.713	401.071	419.378
792	35	4	2	50140525			0	1	1	35	35	1	1	3	35	2	4	2	2	1	2	3	501402	2	35	0	3	1	2	4	1	5014	501405	50140202	18	1	1	133.142	0	38	571.963	586.637	594.729	622.518	546.014	632.78	664.421	574.64	570.302
792	35	4	2	50140529			0	1	1	35	35	1	2	2	35	3	3	2	2	2	4	9	501402	2	35	0	3	1	2	4	1	5014	501405	50140202	10	1	1	133.142	0	38	519.704	485.262	472.137	421.306	448.314	456.841	521.043	476.143	482.001
792	35	4	2	50140530			1	2	1	35	35	2	3	3	35	2	1	2	2	3	1	3	501402	2	35	0	3	1	2	4	1	5014	501405	50140202	11	1	1	133.142	0	38	499.926	474.877	514.053	467.988	450.679	429.317	503.881	431.734	434.945
792	35	4	2	50140531			0	1	1	35	35	1	1	2	35	3	4	2	2	1	2	4	501402	2	35	0	3	1	2	4	1	5014	501405	50140202	7	1	1	133.142	0	38	530.191	535.524	536.407	514.008	484.244	529.974	518.305	483.005	553.566
792	35	4	2	50140533			1	2	1	35	35	2	1	2	35	2	9	2	3	2	3	4	501402	2	35	0	3	1	2	4	1	5014	501405	50140202	13	1	1	133.142	0	38	509.153	608.825	533.186	548.837	485.507	546.694	500.908	476.842	514.583
792	35	4	2	50140535			0	2	1	35	35	2											501402	2	35	0	3	1	2	4	1	5014	501405	50140202	8	1	1	133.142	0	38	414.618	421.393	433.033	458.526	419.567	433.183	397.76	424.76	474.401
792	35	2	4	50150103			0	1	1	35	35	1	2	3	35	2	3	2	2	1	3	2	501501	1	35	0	2	1	2	4	1	5015	501501	50150101	9	1	1	160.535	0	5	584.537	512.368	558.249	589.658	555.105	517.246	598.432	587.055	557.881
792	35	2	4	50150104			0	1	1	35	35	1	1	3	35	3	3	2	2	1	3	1	501501	1	35	0	2	1	2	4	1	5015	501501	50150101	10	1	1	160.535	0	5	525.137	582.62	576.106	495.552	610.673	599.688	545.355	537.618	579.244
792	35	2	4	50150105			0	1	1	35	35	1	2	3	35	4	4	1	1	1	1	1	501501	1	35	0	2	1	2	4	1	5015	501501	50150101	11	1	1	160.535	0	5	590.529	555.44	555.086	573.345	623.758	511.352	522.205	535.379	514.061
792	35	2	4	50150106			1	1	1	35	35	1	1	3	35	3	3	2	1	1	1	1	501501	1	35	0	2	1	2	4	1	5015	501501	50150101	1	1	1	160.535	0	5	575.287	615.498	620.042	631.569	535.355	545.973	575.176	572.358	556.328
792	35	2	4	50150107			0	2	1	35	35	2	2	2	35	2	3	2	2	1	3	4	501501	1	35	0	2	1	2	4	1	5015	501501	50150101	2	1	1	160.535	0	5	573.672	620.392	540.225	583.356	580.399	607.774	579.74	596.002	600.004
792	35	2	4	50150108			1	2	1	35	35	2	2	3	35	2	3	2	2	1	2	1	501501	1	35	0	2	1	2	4	1	5015	501501	50150101	12	1	1	160.535	0	5	613.139	490.186	595.078	529.018	509.286	519.448	481.804	495.458	551.58
792	35	2	4	50150109			0	2	1	35	35	2	3	3	35	3	3	2	1	1	1	1	501501	1	35	0	2	1	2	4	1	5015	501501	50150101	13	1	1	160.535	0	5	528.092	563.539	545.904	534.528	535.345	501.914	485.888	513.46	555.267
792	35	2	4	50150110			1	1	1	35	35	1	1	2	35	2	2	2	2	2	3	1	501501	1	35	0	2	1	2	4	1	5015	501501	50150101	14	1	1	160.535	0	5	422.635	426.161	424.351	398.815	418.219	456.106	417.324	401.163	385.153
792	35	2	4	50150112			1	1	1	35	35	1	2	3	35	3	2	2	2	2	1	2	501501	1	35	0	2	1	2	4	1	5015	501501	50150101	16	1	1	160.535	0	5	348.015	340.926	297.809	349.924	294.751	408.628	333.494	375.034	376.821
792	35	2	4	50150113			0	1	2	35	35	1	1	3	35	1	4	2	2	2	3	1	501501	1	35	0	2	1	2	4	1	5015	501501	50150101	3	1	1	160.535	0	5	561.199	601.572	609.585	649.839	587.864	622.854	579.3	613.185	638.58
792	35	2	4	50150114			1	2	2	35	35	2	2	3	35	3	4	2	2	3	2	3	501501	1	35	0	2	1	2	4	1	5015	501501	50150101	4	1	1	160.535	0	5	566.43	537.703	569.138	590.075	523.328	588.22	633.304	543.446	581.331
792	35	2	4	50150115			0	2	2	35	35	2	2	2	35	2	2	2	2	1	3	1	501501	1	35	0	2	1	2	4	1	5015	501501	50150101	5	1	1	160.535	0	5	620.109	637.565	595.912	599.192	595.806	614.499	650.108	608.544	654.046
792	35	2	4	50150116			0	1	2	35	35	1	1	3	35	2	2	2	3	2	5	9	501501	1	35	0	2	1	2	4	1	5015	501501	50150101	17	1	1	160.535	0	5	447.782	511.653	468.723	505.244	495.978	475.236	491.889	445.761	519.504
792	35	2	4	50150117			0	1	2	35	35	1	1	2	35	2	5	2	2	2	4	2	501501	1	35	0	2	1	2	4	1	5015	501501	50150101	18	1	1	160.535	0	5	484.131	587.358	553.419	482.9	535.133	503.533	487.794	605.392	600.444
792	35	2	4	50150118			0	2	2	35	35	2	1	2	35	3	4	2	2	1	3	3	501501	1	35	0	2	1	2	4	1	5015	501501	50150101	10	1	1	160.535	0	5	493.999	458.074	526.471	480.047	493.033	440.268	466.895	468.563	490.219
792	35	2	4	50150119			0	1	2	35	35	1	1	2	35	1	3	2	2	2	2	5	501501	1	35	0	2	1	2	4	1	5015	501501	50150101	6	1	1	160.535	0	5	488.011	480.301	485.651	502.42	526.109	466.086	491.081	511.154	469.843
792	35	2	4	50150120			1	2	2	35	35	2	3	2	35	1	4	2	2	2	3	2	501501	1	35	0	2	1	2	4	1	5015	501501	50150101	11	1	1	160.535	0	5	481.292	504.933	503.499	474.985	432.896	405.829	443.619	417.146	470.697
792	35	2	4	50150121			0	1	2	35	35	1	2	3	35	3	4	1	1	1	1	1	501501	1	35	0	2	1	2	4	1	5015	501501	50150101	7	1	1	160.535	0	5	598.765	598.738	612.887	687.231	635.966	617.439	636.32	608.735	626.41
792	35	2	4	50150122			0	2	2	35	35	2	3	2	35	3	5	1	1	1	1	2	501501	1	35	0	2	1	2	4	1	5015	501501	50150101	12	1	1	160.535	0	5	465.317	517.999	499.15	479.298	507.105	491.421	481.01	433.07	534.218
792	35	2	4	50150123			0	1	2	35	35	1	1	2	35	3	3	3	3	1	5	5	501501	1	35	0	2	1	2	4	1	5015	501501	50150101	8	1	1	160.535	0	5	553.143	569.555	502.22	570.679	548.599	542.948	533.604	552.1	604.244
792	35	2	4	50150124			1	2	2	35	35	2	1	2	35	1	4	2	2	1	4	2	501501	1	35	0	2	1	2	4	1	5015	501501	50150101	9	1	1	160.535	0	5	545.28	541.914	500.726	577.232	539.66	561.248	535.438	564.979	571.578
792	35	2	4	50150801			0	2	1	35	35	2	2	3	35	1	1	3	3	2	5	3	501502	2	35	0	3	1	2	4	1	5015	501508	50150202	13	1	1	152.948	0	5	546.307	511.195	532.169	496.098	469.415	512.093	493.561	462.78	486.542
792	35	2	4	50150802			0	2	1	35	35	2	1	3	35	5	5	1	1	1	1	1	501502	2	35	0	3	1	2	4	1	5015	501508	50150202	1	1	1	152.948	0	5	657.075	567.233	636.868	633.899	609.629	656.374	607.117	620.838	604.835
792	35	2	4	50150803			0	1	1	35	35	1	2	2	35	2	2	2	3	2	5	3	501502	2	35	0	3	1	2	4	1	5015	501508	50150202	14	1	1	152.948	0	5	490.59	505.665	486.046	477.959	487.616	522.349	487.532	485.611	505.533
792	35	2	4	50150804			0	2	1	35	35	2	1	2	35	3	2	2	3	1	4	4	501502	2	35	0	3	1	2	4	1	5015	501508	50150202	2	1	1	152.948	0	5	515.209	542.32	546.431	556.277	535.718	548.684	562.679	550.787	595.803
792	35	2	4	50150805			1	1	1	35	35	1	1	2	35	3	5	1	1	2	1	1	501502	2	35	0	3	1	2	4	1	5015	501508	50150202	15	1	1	152.948	0	5	515.487	537.973	576.393	582.593	572.299	530.374	530.552	563.855	618.053
792	35	2	4	50150806			1	1	1	35	35	1	2	2	35	4	4	2	1	2	3	1	501502	2	35	0	3	1	2	4	1	5015	501508	50150202	3	1	1	152.948	0	5	558.231	540.045	536.141	565.64	495.804	618.204	616.409	518.983	531.001
792	35	2	4	50150807			0	2	1	35	35	2	2	2	35	2	2	2	3	1	5	3	501502	2	35	0	3	1	2	4	1	5015	501508	50150202	16	1	1	152.948	0	5	552.507	540.663	514.438	539.377	483.083	546.771	542.51	501.544	550.75
792	35	2	4	50150808			1	1	1	35	35	1	1	3	35	5	5	1	1	1	1	1	501502	2	35	0	3	1	2	4	1	5015	501508	50150202	17	1	1	152.948	0	5	609.723	522.338	602.71	577.507	590.486	635.863	595.01	656.562	627.58
792	35	2	4	50150809			0	2	1	35	35	2	1	2	35	1	2	3	3	2	5	5	501502	2	35	0	3	1	2	4	1	5015	501508	50150202	18	1	1	152.948	0	5	370.007	443.878	437.621	398.732	448.179	427.309	414.495	445.537	425.447
792	35	2	4	50150810			0	2	1	35	35	2	2	3	35	5	5	1	1	1	1	1	501502	2	35	0	3	1	2	4	1	5015	501508	50150202	4	1	1	152.948	0	5	528.181	474.945	546.503	532.818	534.869	513.484	503.732	469.237	528.208
792	35	2	4	50150811			1	2	1	35	35	2	2	2	35	2	3	2	2	2	4	3	501502	2	35	0	3	1	2	4	1	5015	501508	50150202	5	1	1	152.948	0	5	446.723	452.492	454.098	485.364	396.453	532.303	501.427	487.095	484.088
792	35	2	4	50150813			0	1	1	35	35	1	3	2	35	1	1	3	3	3	5	5	501502	2	35	0	3	1	2	4	1	5015	501508	50150202	6	1	1	152.948	0	5	504.75	491.442	491.074	458.295	482.254	494.211	500.449	473.515	489.284
792	35	2	4	50150814			0	2	1	35	35	2	1	3	35	2	3	2	3	2	5	3	501502	2	35	0	3	1	2	4	1	5015	501508	50150202	7	1	1	152.948	0	5	511.875	495.686	490.472	498.73	537.43	499.626	505.636	537.159	550.932
792	35	2	4	50150815			0	1	1	35	35	1	2	3	35	3	3	2	2	1	3	4	501502	2	35	0	3	1	2	4	1	5015	501508	50150202	10	1	1	152.948	0	5	569.238	603.66	540.348	533.746	586.067	636.902	593.022	574.074	552.911
792	35	2	4	50150816			1	1	1	35	35	1	3	2	35	2	3	2	3	2	5	3	501502	2	35	0	3	1	2	4	1	5015	501508	50150202	11	1	1	152.948	0	5	491.07	498.619	494.3	499.136	524.797	552.314	523.679	497.931	519.31
792	35	2	4	50150817			0	2	1	35	35	2	1	3	35	3	4	1	1	2	1	1	501502	2	35	0	3	1	2	4	1	5015	501508	50150202	12	1	1	152.948	0	5	608.185	575.594	593.31	602.262	561.638	544.346	582.873	532.341	608.093
792	35	2	4	50150818			0	1	1	35	35	1	3	2	35	2	2	2	3	1	4	3	501502	2	35	0	3	1	2	4	1	5015	501508	50150202	13	1	1	152.948	0	5	589.146	600.114	574.42	558.627	577.44	660.186	577.916	582.392	589.924
792	35	2	4	50150819			1	1	1	35	35	1	1	2	35	4	4	2	2	1	5	4	501502	2	35	0	3	1	2	4	1	5015	501508	50150202	8	1	1	152.948	0	5	407.844	468.041	472.917	497.136	467.063	523.157	526.453	456.432	472.112
792	35	2	4	50150820			0	1	1	35	35	1	1	2	35	2	2	2	3	1	4	3	501502	2	35	0	3	1	2	4	1	5015	501508	50150202	9	1	1	152.948	0	5	386.376	458.011	389.143	406.954	427.21	394.385	404.454	382.144	422.789
792	35	2	4	50150821			1	1	1	35	35	1	2	3	35	3	4	2	2	1	3	3	501502	2	35	0	3	1	2	4	1	5015	501508	50150202	1	1	1	152.948	0	5	478.571	510.746	519.264	514.477	495.763	506.56	445.933	516.679	498.932
792	35	2	4	50150822			1	2	1	35	35	2	3	2	35	2	3	2	3	1	4	5	501502	2	35	0	3	1	2	4	1	5015	501508	50150202	14	1	1	152.948	0	5	515.88	500.981	531.026	538.197	534.342	501.35	489.68	530.609	494.744
792	35	2	4	50150823			0	1	1	35	35	1	2	3				9					501502	2	35	0	3	1	2	4	1	5015	501508	50150202	2	1	1	152.948	0	5	380.645	400.092	413.19	419.841	410.647	414.926	392.224	414.769	450.349
792	35	2	4	50150825			0	2	1	35	35	2	2	3	35	1	5	2	2	3	3	3	501502	2	35	0	3	1	2	4	1	5015	501508	50150202	15	1	1	152.948	0	5	658.192	627.984	598.357	593.628	637.605	586.499	604.722	616.939	564.328
792	35	1	4	50160201			0	2	1	35	35	2	3	9	35	3	2	2	2	3	5	2	501601	1	35	0	2	1	2	4	1	5016	501602	50160101	18	1	1	257.154	0	20	493.115	483.627	477.098	420.556	484.96	380.015	465.066	488.387	450.847
792	35	1	4	50160202			0	1	1	35	35	1	1	3	35	4	4	2	2	3	2	4	501601	1	35	0	2	1	2	4	1	5016	501602	50160101	1	1	1	257.154	0	20	492.819	487.572	489.104	469.559	435.96	420.774	466.675	465.13	461.831
792	35	1	4	50160203			1	2	1	35	35	2	1	3	35	3	2	2	3	3	5	4	501601	1	35	0	2	1	2	4	1	5016	501602	50160101	2	1	1	257.154	0	20	462.866	440.883	434.329	480.484	453.257	452.126	456.81	425.216	429.316
792	35	1	4	50160204			0	2	1	35	35	2	1	3	35	4	3	2	2	2	1	3	501601	1	35	0	2	1	2	4	1	5016	501602	50160101	3	1	1	257.154	0	20	473.671	491.098	486.598	495.543	505.191	508.904	483.35	459.695	445.027
792	35	1	4	50160206			0	2	1	35	35	2	2	2	35	2	1	3	3	3	5	4	501601	1	35	0	2	1	2	4	1	5016	501602	50160101	10	1	1	257.154	0	20	412.329	346.298	333.712	336.964	344.132	364.572	353.434	398.762	342.298
792	35	1	4	50160207			0	2	1	35	35	2	2	2	35	3	2	2	3	3	5	4	501601	1	35	0	2	1	2	4	1	5016	501602	50160101	11	1	1	257.154	0	20	492.935	490.128	445.121	486.867	505.224	498.704	489.17	492.952	480.535
792	35	1	4	50160208			0	2	1	35	35	2	2	1	35	4	4	2	1	1	1	3	501601	1	35	0	2	1	2	4	1	5016	501602	50160101	12	1	1	257.154	0	20	526.624	611.743	621.213	597.77	571.607	576.031	586.911	612.105	549.191
792	35	1	4	50160210			0	1	1	35	35	1	1	3	35	4	3	2	2	3	5	4	501601	1	35	0	2	1	2	4	1	5016	501602	50160101	6	1	1	257.154	0	20	518.907	548.245	539.2	550.097	571.144	565.615	573.41	553.614	565.544
792	35	1	4	50160211			1	1	1	35	35	1	1	3	35	3	2	2	3	3	5	4	501601	1	35	0	2	1	2	4	1	5016	501602	50160101	13	1	1	257.154	0	20	528.305	486.983	485.74	522.931	451.954	479.272	476.92	464.206	497.171
792	35	1	4	50170101			0	1	1	35	35	1	1	3	35	4	4	2	2	1	2	6	501701	1	35	0	2	1	2	4	1	5017	501701	50170101	10	1	1	69.9698	0	41	503.764	489.044	527.003	508.55	473.107	540.16	477.561	501.44	457.843
792	35	1	4	50170102			0	2	1	35	35	2	2	2	35	3	3	2	2	2	1	3	501701	1	35	0	2	1	2	4	1	5017	501701	50170101	11	1	1	69.9698	0	41	544.898	522.624	507.781	486.9	548.955	535.596	477.485	543.016	506.33
792	35	1	4	50170103			1	1	1	35	35	1	1	2	35	4	5	1	1	1	1	1	501701	1	35	0	2	1	2	4	1	5017	501701	50170101	1	1	1	69.9698	0	41	638.023	619.135	666.667	685.549	659.92	638.968	616.424	615.458	609.867
792	35	1	4	50170104			0	1	1	35	35	1	1	3	35	4	4	2	1	1	1	3	501701	1	35	0	2	1	2	4	1	5017	501701	50170101	12	1	1	69.9698	0	41	601.172	602.295	576.823	613.851	627.078	656.97	645.029	590.943	647.542
792	35	1	4	50170105			0	1	1	35	35	1	1	3	35	3	4	2	2	2	1	3	501701	1	35	0	2	1	2	4	1	5017	501701	50170101	13	1	1	69.9698	0	41	554.759	541.339	536.975	575.833	548.581	550.506	550.987	525.709	581.432
792	35	1	4	50170106			1	2	1	35	35	2	2	3	35	3	3	2	2	2	1	3	501701	1	35	0	2	1	2	4	1	5017	501701	50170101	2	1	1	69.9698	0	41	590.151	628.025	610.781	583.86	596.562	571.799	614.603	527.967	556.857
792	35	1	4	50170108			0	2	1	35	35	2	3	3	35	2	2	2	2	2	2	4	501701	1	35	0	2	1	2	4	1	5017	501701	50170101	15	1	1	69.9698	0	41	514.178	468.137	543.689	555.263	511.882	483.621	472.225	459.302	479.74
792	35	1	4	50170109			0	1	1	35	35	1	2	3	35	3	4	1	1	2	1	1	501701	1	35	0	2	1	2	4	1	5017	501701	50170101	3	1	1	69.9698	0	41	535.126	567.903	571.159	511.709	546.173	516.491	593.994	546.936	563.511
792	35	1	4	50170110			0	2	1	35	35	2	2	3	35	3	3	2	2	2	1	3	501701	1	35	0	2	1	2	4	1	5017	501701	50170101	4	1	1	69.9698	0	41	533.035	520.837	521.358	469.382	528.147	515.92	530.106	538.621	513.376
792	35	1	4	50170111			0	2	1	35	35	2	1	2	35	4	4	2	1	3	1	3	501701	1	35	0	2	1	2	4	1	5017	501701	50170101	16	1	1	69.9698	0	41	594.416	538.36	596.034	569.907	566.82	583.886	543.247	599.01	570.301
792	35	1	4	50170112			0	1	1	35	35	1	3	3	35	5	5	1	1	2	1	1	501701	1	35	0	2	1	2	4	1	5017	501701	50170101	17	1	1	69.9698	0	41	624.838	536.209	589.628	647.902	602.532	698.216	634.008	590.867	610.609
792	35	1	4	50170113			0	2	1	35	35	2	3	2	35	3	2	2	2	2	1	3	501701	1	35	0	2	1	2	4	1	5017	501701	50170101	5	1	1	69.9698	0	41	544.541	542.846	584.125	537.913	564.225	548.052	556.85	617.329	532.915
792	35	1	4	50170114			1	2	1	35	35	2	3	3	35	3	5	2	1	2	1	3	501701	1	35	0	2	1	2	4	1	5017	501701	50170101	18	1	1	69.9698	0	41	557.837	569.459	566.166	570.353	558.665	620.484	602.056	553.08	495.032
792	35	1	4	50170115			1	2	1	35	35	2	2	3	35	5	5	1	1	1	1	1	501701	1	35	0	2	1	2	4	1	5017	501701	50170101	6	1	1	69.9698	0	41	584.039	635.27	614.803	645.417	644.288	685.049	593.682	655.327	654.147
792	35	1	4	50170116			0	1	1	35	35	1	1	3	35	3	3	2	1	2	1	1	501701	1	35	0	2	1	2	4	1	5017	501701	50170101	7	1	1	69.9698	0	41	571.632	618.49	565.024	569.782	579.457	522.481	600.361	550.613	574.548
792	35	1	4	50170117			0	2	1	35	35	2	2	3	35	3	2	2	2	3	1	3	501701	1	35	0	2	1	2	4	1	5017	501701	50170101	8	1	1	69.9698	0	41	565.419	588.18	580.96	587.066	514.14	571.577	509.968	536.123	536.844
792	35	1	4	50170118			1	1	1	35	35	1	2	3	35	3	5	1	1	2	1	1	501701	1	35	0	2	1	2	4	1	5017	501701	50170101	9	1	1	69.9698	0	41	628.069	651.412	676.201	650.976	653.48	637.001	626.712	647.545	630.037
792	35	1	4	50170119			0	1	1	35	35	1	1	3				9					501701	1	35	0	2	1	2	4	1	5017	501701	50170101	1	1	1	69.9698	0	41	606.679	652.58	576.339	604.294	611.483	606.818	621.405	622.506	592.884
792	35	1	4	50170120			1	2	1	35	35	2	1	3				9					501701	1	35	0	2	1	2	4	1	5017	501701	50170101	10	1	1	69.9698	0	41	442.063	409.699	407.391	439.383	432.773	397.122	449.335	395.732	415.968
792	35	4	2	50180201			0	1	1	35	35	1	2	9	35	3	2	2	2	2	2	3	501801	1	35	0	3	1	2	4	1	5018	501802	50180101	18	1	1	90.2874	1	62	556.181	561.773	459.389	635.603	524.188	551.52	555.967	552.401	460.492
792	35	4	2	50180202			0	1	1	35	35	1	1	1	35	1	3	2	2	1	3	3	501801	1	35	0	3	1	2	4	1	5018	501802	50180101	10	1	1	90.2874	1	62	471.506	477.329	497.46	429.252	439.192	458.542	439.357	480.934	498.071
792	35	4	2	50180203			0	1	1	35	35	1	1	2	35	4	4	2	2	1	5	6	501801	1	35	0	3	1	2	4	1	5018	501802	50180101	11	1	1	90.2874	1	62	538.531	578.954	577.774	544.7	573.276	551.37	531.321	533.536	519.045
792	35	4	2	50180205			0	2	1	35	35	2	2	2	35	4	4	1	1	2	1	2	501801	1	35	0	3	1	2	4	1	5018	501802	50180101	1	1	1	90.2874	1	62	499.258	557.886	492.45	485.058	506.732	539.339	536.349	548.445	529.962
792	35	4	2	50180206			0	2	1	35	35	2	1	2	35	3	3	2	2	1	3	4	501801	1	35	0	3	1	2	4	1	5018	501802	50180101	2	1	1	90.2874	1	62	431.397	456.707	445.087	400.748	425.365	411.455	454.871	380.874	420.15
792	35	4	2	50180207			0	1	1	35	35	1	2	2	35	3	4	2	2	2	3	2	501801	1	35	0	3	1	2	4	1	5018	501802	50180101	3	1	1	90.2874	1	62	583.148	553.944	558.893	589.409	577.123	645.363	607.422	565.671	600.823
792	35	4	2	50180208			1	1	1	35	35	1	1	1	35	3	3	2	2	1	1	4	501801	1	35	0	3	1	2	4	1	5018	501802	50180101	12	1	1	90.2874	1	62	570.488	575.158	604.809	600.326	574.028	551.108	579.489	576.15	594.125
792	35	4	2	50180209			0	2	1	35	35	2	2	3	35	1	1	2	3	3	5	6	501801	1	35	0	3	1	2	4	1	5018	501802	50180101	13	1	1	90.2874	1	62	428.397	410.329	366.048	410.007	350.277	382.993	382.339	456.223	352.491
792	35	4	2	50180210			0	2	1	35	35	2	1	2	35	4	5	2	2	2	3	3	501801	1	35	0	3	1	2	4	1	5018	501802	50180101	14	1	1	90.2874	1	62	542.607	572.093	547.629	549.264	565.334	519.324	573.834	589.129	587.354
792	35	4	2	50180211			0	1	1	35	35	1	1	2	35	2	1	2	3	2	3	3	501801	1	35	0	3	1	2	4	1	5018	501802	50180101	4	1	1	90.2874	1	62	562.158	558.871	507.607	522.162	524.455	533.281	537.72	531.15	529.209
792	35	4	2	50180212			0	1	1	35	35	1	1	2	35	2	1	2	3	1	4	4	501801	1	35	0	3	1	2	4	1	5018	501802	50180101	5	1	1	90.2874	1	62	358.885	360.016	397.222	313.538	344.341	379.945	358.714	353.678	318.457
792	35	4	2	50180213			1	2	1	35	35	2	1	2	35	3	5	2	2	1	3	3	501801	1	35	0	3	1	2	4	1	5018	501802	50180101	6	1	1	90.2874	1	62	558.083	541.618	627.247	581.032	567.195	601.868	556.179	531.744	533.705
792	35	4	2	50180214			0	1	1	35					35	4	5	9	2	1	5	3	501801	1	35	0	3	1	2	4	1	5018	501802	50180101	7	1	1	90.2874	1	62	484.318	504.167	461.888	482.365	470.791	495.464	457.685	505.139	419.904
792	35	4	2	50180215			1	1	1	35	35	1	1	2	35	3	3	2	2	1	3	4	501801	1	35	0	3	1	2	4	1	5018	501802	50180101	15	1	1	90.2874	1	62	423.831	482.852	476.313	502.193	457.32	441.99	448.169	424.471	402.942
792	35	4	2	50180216			0	1	1	35	35	1	1	3	35	1	3	2	3	2	4	3	501801	1	35	0	3	1	2	4	1	5018	501802	50180101	8	1	1	90.2874	1	62	565.61	536.362	543.422	521.396	546.704	539.638	568.599	495.991	531.61
792	35	4	2	50180217			0	1	1	35	35	1	2	2	35	3	3	2	2	2	3	5	501801	1	35	0	3	1	2	4	1	5018	501802	50180101	16	1	1	90.2874	1	62	524.598	544.349	538.431	599.849	528.234	492.799	550.847	553.965	570.43
792	35	4	2	50180218			1	2	1	35	35	2	2	2	35	3	3	2	2	1	3	3	501801	1	35	0	3	1	2	4	1	5018	501802	50180101	17	1	1	90.2874	1	62	571.551	547.444	551.483	577.746	535.01	493.415	489.524	585.84	515.749
792	35	4	2	50180219			1	1	1	35	35	1	2	2	35	4	5	1	1	1	1	3	501801	1	35	0	3	1	2	4	1	5018	501802	50180101	9	1	1	90.2874	1	62	579.613	558.167	545.578	552.997	537.591	524.848	511.736	537.929	521.183
792	35	4	2	50180220			0	1	1	35	35	1	2	2	35	2	3	2	2	2	3	3	501801	1	35	0	3	1	2	4	1	5018	501802	50180101	1	1	1	90.2874	1	62	365.142	415.263	422.323	415.882	411.4	375.4	421.579	448.191	437.205
792	35	4	2	50180221			0	1	1	35	35	1	1	2	35	2	2	2	3	2	3	4	501801	1	35	0	3	1	2	4	1	5018	501802	50180101	18	1	1	90.2874	1	62	543.698	522.71	558.386	562.005	535.067	575.283	526.207	536.881	587.922
792	35	4	2	50180222			1	2	1	35	35	2	2	3	35	3	3	2	2	2	1	3	501801	1	35	0	3	1	2	4	1	5018	501802	50180101	10	1	1	90.2874	1	62	516.985	475.147	511.295	513.986	485.888	456.157	471.306	528.558	453.891
792	35	4	2	50180223			0	2	1	35	35	2	2	1	35	2	2	3	3	3	5	4	501801	1	35	0	3	1	2	4	1	5018	501802	50180101	2	1	1	90.2874	1	62	479.183	431.191	466.461	511.874	468.587	443.547	460.866	435.305	457.395
792	35	4	2	50180224			0	1	1	35	35	1	1	2	35	2	2	2	3	2	4	4	501801	1	35	0	3	1	2	4	1	5018	501802	50180101	11	1	1	90.2874	1	62	445.063	495.781	461.085	507.039	504.543	445.868	478.932	438.976	485.471
792	35	4	2	50180225			1	2	1	35	35	2	1	3	35	4	3	2	2	2	5	2	501801	1	35	0	3	1	2	4	1	5018	501802	50180101	3	1	1	90.2874	1	62	481.836	432.534	457.22	446.015	453.358	524.035	461.66	485.781	505.616
792	35	4	2	50180226			0	1	1	35	35	1	1	2	35	5	4	2	1	1	1	3	501801	1	35	0	3	1	2	4	1	5018	501802	50180101	12	1	1	90.2874	1	62	481.02	461.64	425.448	467.627	514.936	416.521	436.388	430.238	497.961
792	35	4	2	50180227			1	2	1	35	35	2	1	3	35	4	5	2	2	2	5	4	501801	1	35	0	3	1	2	4	1	5018	501802	50180101	4	1	1	90.2874	1	62	561.225	579.93	601.818	581.504	553.56	575.634	546.913	553.45	533.649
792	35	4	2	50180228			0	1	1	35	35	1	1	3	35	3	4	2	2	1	3	3	501801	1	35	0	3	1	2	4	1	5018	501802	50180101	5	1	1	90.2874	1	62	363.766	374.062	401.723	340.101	461.294	359.257	310.424	406.333	349.477
792	35	4	2	50180229			0	1	1	35	35	1	1	3	35	3	1	2	3	1	5	4	501801	1	35	0	3	1	2	4	1	5018	501802	50180101	6	1	1	90.2874	1	62	525.896	557.615	575.583	549.216	559.612	510.338	561.621	594.024	574.751
792	35	4	2	50180230			0	1	1	35	35	1	2	3	35	3	3	2	2	1	2	4	501801	1	35	0	3	1	2	4	1	5018	501802	50180101	7	1	1	90.2874	1	62	452.078	449.136	461.271	463.258	452.979	457.791	369.31	419.303	399.453
792	35	4	2	50180231			1	2	1	35	35	2	2	3	35	3	3	2	2	2	1	3	501801	1	35	0	3	1	2	4	1	5018	501802	50180101	8	1	1	90.2874	1	62	448.011	415.705	393.331	398.884	347.55	375.866	392.197	432.886	393.44
792	35	4	2	50180232			0	1	1	35	35	1	1	2	35	2	2	2	2	2	3	3	501801	1	35	0	3	1	2	4	1	5018	501802	50180101	13	1	1	90.2874	1	62	609.578	628.096	535.754	586.719	574.663	547.216	624.918	575.929	650.034
792	35	4	2	50180233			1	1	1	35	35	1	1	2	35	2	4	2	2	1	3	3	501801	1	35	0	3	1	2	4	1	5018	501802	50180101	14	1	1	90.2874	1	62	531.359	531.473	537.369	494.868	554.233	499.117	502.644	540.78	521.36
792	35	4	2	50180234			0	2	1	35	35	2	1	3	35	4	2	2	2	2	5	3	501801	1	35	0	3	1	2	4	1	5018	501802	50180101	15	1	1	90.2874	1	62	532.907	550.711	545.587	590.368	578.833	592.076	622.383	514.865	554.54
792	35	4	2	50180235			0	2	1	35	35	2	1	2	35	4	5	2	1	1	2	3	501801	1	35	0	3	1	2	4	1	5018	501802	50180101	16	1	1	90.2874	1	62	718.184	641.864	654.341	693.549	555.399	644.756	650.768	641.06	606.128
792	35	4	2	50180236			0	1	1	35	35	1	1	3	35	2	3	2	2	1	3	3	501801	1	35	0	3	1	2	4	1	5018	501802	50180101	17	1	1	90.2874	1	62	413.343	405.555	391.249	401.511	381.362	345.17	413.624	352.612	398.857
792	35	4	2	50180237			1	1	1	35	35	1	1	3	35	3	4	2	2	2	9	3	501801	1	35	0	3	1	2	4	1	5018	501802	50180101	18	1	1	90.2874	1	62	526.301	554.745	517.562	557.095	621.324	640.741	580.085	607.111	601.642
792	35	4	2	50180238			0	2	1	35	35	2	2	2	35	3	3	2	2	1	4	4	501801	1	35	0	3	1	2	4	1	5018	501802	50180101	10	1	1	90.2874	1	62	333.004	338.382	378.835	378.996	337.992	415.25	331.938	355.663	375.753
792	35	4	2	50180241			1	2	1	35	35	2			35	3	3	9	2	2	3	2	501801	1	35	0	3	1	2	4	1	5018	501802	50180101	2	1	1	90.2874	1	62	505.531	497.849	484.55	521.957	453.169	481.888	506.177	449.293	502.292
792	35	4	2	50180501			0	1	1	35	35	1	1	2	35	1	1	2	2	1	3	1	501802	2	35	0	2	1	2	4	1	5018	501805	50180202	2	1	1	96.5141	1	62	586.017	606.558	579.028	592.132	582.702	626.138	576.682	580.551	585.628
792	35	4	2	50180502			0	2	1	35	35	2	1	3	35	2	2	2	3	2	5	4	501802	2	35	0	2	1	2	4	1	5018	501805	50180202	11	1	1	96.5141	1	62	392.564	393.148	413.02	408.336	401.108	371.139	396.031	474.565	347.549
792	35	4	2	50180503			0	1	1	35	35	1	1	2	35	1	1	2	3	2	3	2	501802	2	35	0	2	1	2	4	1	5018	501805	50180202	12	1	1	96.5141	1	62	563.287	545.186	581.576	525.041	526.827	608.502	553.527	524.972	529.612
792	35	4	2	50180505			0	2	1	35	35	2	1	2	35	1	1	3	3	2	3	4	501802	2	35	0	2	1	2	4	1	5018	501805	50180202	13	1	1	96.5141	1	62	430.113	452.178	448.308	396.487	394.633	357.066	399.944	391.443	342.935
792	35	4	2	50180507			0	2	1	35	35	2	2	2	35	2	2	3	3	2	4	4	501802	2	35	0	2	1	2	4	1	5018	501805	50180202	4	1	1	96.5141	1	62	502.013	478.84	508.868	505.888	458.142	405.666	469.801	441.474	468.035
792	35	4	2	50180508			0	2	1	35	35	2	1	2	35	3	2	2	2	2	3	3	501802	2	35	0	2	1	2	4	1	5018	501805	50180202	5	1	1	96.5141	1	62	470.458	464.057	469.652	456.156	459.819	464.964	452.269	463.253	428.496
792	35	4	2	50180509			0	1	1	35	35	1	2	3	35	1	1	2	3	1	4	3	501802	2	35	0	2	1	2	4	1	5018	501805	50180202	15	1	1	96.5141	1	62	352.69	413.325	343.554	398.616	381.416	458.267	361.482	429.363	379.762
792	35	4	2	50180511			0	1	1	35	35	1	1	3	35	1	1	3	3	2	4	4	501802	2	35	0	2	1	2	4	1	5018	501805	50180202	17	1	1	96.5141	1	62	296.378	276.665	269.212	350.986	320.001	281.779	291.784	310.461	291.179
792	35	4	2	50180512			0	1	1	35	35	1	1	3	35	1	1	2	3	2	3	5	501802	2	35	0	2	1	2	4	1	5018	501805	50180202	18	1	1	96.5141	1	62	338.854	391.013	381.657	335.87	412.452	352.513	379.791	358.726	398.832
792	35	4	2	50180513			0	1	1	35	35	1	1	2	35	1	2	2	3	2	4	4	501802	2	35	0	2	1	2	4	1	5018	501805	50180202	6	1	1	96.5141	1	62	458.322	434.312	419.643	451.192	473.629	424.133	378.046	434.808	407.551
792	35	4	2	50180514			0	2	1	35	35	2	2	2	35	1	2	2	3	2	4	2	501802	2	35	0	2	1	2	4	1	5018	501805	50180202	7	1	1	96.5141	1	62	469.344	462.271	449.906	449.407	445.139	465.481	418.597	429.652	417.43
792	35	4	2	50180515			0	1	1	35	35	1	2	2	35	3	2	2	3	2	4	4	501802	2	35	0	2	1	2	4	1	5018	501805	50180202	10	1	1	96.5141	1	62	445.411	474.464	479.045	404.637	468.098	463.79	469.167	430.558	432.086
792	35	4	2	50180516			0	1	1	35	35	1	1	2	35	3	2	2	2	2	3	3	501802	2	35	0	2	1	2	4	1	5018	501805	50180202	8	1	1	96.5141	1	62	524.863	524.496	517.092	515.76	513.337	515.015	514.607	519.613	514.703
792	35	4	2	50180518			1	1	1	35	35	1	1	2	35	2	3	2	2	2	3	1	501802	2	35	0	2	1	2	4	1	5018	501805	50180202	9	1	1	96.5141	1	62	548.64	544.819	502.196	538.269	575.882	565.353	584.799	582.846	552.126
792	35	4	2	50180519			0	1	1	35	35	1	1	2	35	1	1	2	3	3	3	5	501802	2	35	0	2	1	2	4	1	5018	501805	50180202	1	1	1	96.5141	1	62	430.253	358.744	323.826	400.535	404.014	452.003	372.172	406.501	466.138
792	35	4	2	50180520			0	1	1	35	35	1	2	2	35	2	2	2	3	2	3	4	501802	2	35	0	2	1	2	4	1	5018	501805	50180202	11	1	1	96.5141	1	62	414.281	442.001	401.194	411.574	435.751	410.481	378.252	408.7	384.493
792	35	4	2	50180521			1	2	1	35	35	2	1	2	35	2	1	3	3	2	4	4	501802	2	35	0	2	1	2	4	1	5018	501805	50180202	2	1	1	96.5141	1	62	489.691	466.652	421.427	468.874	469.026	506.881	470.017	417.723	434.072
792	35	4	2	50180522			0	2	1	35	35	2	1	3	35	1	1	2	3	3	4	5	501802	2	35	0	2	1	2	4	1	5018	501805	50180202	12	1	1	96.5141	1	62	351.195	360.177	377.784	341.581	413.629	355.914	339.533	393.088	354.679
792	35	4	2	50180523			0	1	1	35	35	1	3	3	35	2	2	2	3	1	3	5	501802	2	35	0	2	1	2	4	1	5018	501805	50180202	13	1	1	96.5141	1	62	492.589	560.059	539.876	461.967	525.74	527.515	587.035	441.496	521.009
792	35	4	2	50180525			1	2	1	35	35	2	2	2	35	3	4	2	2	3	4	5	501802	2	35	0	2	1	2	4	1	5018	501805	50180202	4	1	1	96.5141	1	62	494.433	480.631	451.698	491.343	474.651	467.451	507.557	494.516	498.84
792	35	4	2	50180526			0	1	1	35	35	1	1	3	35	4	3	2	2	2	4	4	501802	2	35	0	2	1	2	4	1	5018	501805	50180202	5	1	1	96.5141	1	62	507.288	485.587	460.972	467.076	470.824	480.325	512.628	486.429	481.789
792	35	4	2	50180527			1	2	1	35	35	2	1	3	35	2	4	2	2	2	3	4	501802	2	35	0	2	1	2	4	1	5018	501805	50180202	6	1	1	96.5141	1	62	462.426	508.836	512.594	487.691	513.493	546.678	492.719	504.031	462.942
792	35	4	2	50180528			0	1	1	35	35	1	2	2	35	1	1	2	3	2	4	1	501802	2	35	0	2	1	2	4	1	5018	501805	50180202	7	1	1	96.5141	1	62	550.64	588.615	578.478	559.313	491.494	583.285	569.884	552.234	532.337
792	35	4	2	50180529			1	2	1	35	35	2	1	3	35	3	3	2	2	1	3	6	501802	2	35	0	2	1	2	4	1	5018	501805	50180202	8	1	1	96.5141	1	62	524.913	535.302	484.367	463.528	505.437	467.972	490.87	471.246	516.919
792	35	4	2	50180530			0	1	1	35	35	1	1	1	35	3	2	3	3	3	5	5	501802	2	35	0	2	1	2	4	1	5018	501805	50180202	14	1	1	96.5141	1	62	550.474	469.955	546.629	544.946	579.288	583.701	546.471	558.978	573.159
792	35	4	2	50180531			1	2	1	35	35	2	1	3	35	1	2	2	3	2	4	6	501802	2	35	0	2	1	2	4	1	5018	501805	50180202	15	1	1	96.5141	1	62	487.223	503.181	455.688	503.329	491.14	477.814	482.677	498.016	582.507
792	35	4	2	50180532			0	2	1	35	35	2	3	3	35	2	3	2	3	3	4	5	501802	2	35	0	2	1	2	4	1	5018	501805	50180202	16	1	1	96.5141	1	62	364.284	395.542	419.818	338.928	386.693	411.672	379.941	407.281	378.363
792	35	4	2	50180535			0	2	1	35	35	2	1	2	35	1	1	3	3	2	5	4	501802	2	35	0	2	1	2	4	1	5018	501805	50180202	18	1	1	96.5141	1	62	277.709	269.39	294.026	228.043	287.529	279.016	274.351	297.818	234.697
792	35	4	2	50180537			0	1	1	35	35	1	1	3	35	1	1	2	3	2	5	5	501802	2	35	0	2	1	2	4	1	5018	501805	50180202	1	1	1	96.5141	1	62	558.132	570.865	601.815	546.259	556.516	526.707	612.414	565.551	536.789
792	35	1	4	50190101			0	2	1	35	35	2	1	2	35			9					501901	1	35	0	3	1	2	4	1	5019	501901	50190101	11	1	1	132.775	1	7	566.844	575.021	548.096	531.11	543.989	584.065	505.289	555.046	586.873
792	35	1	4	50190102			1	1	1	35	35	1	3	3	35	2	2	2	3	1	3	4	501901	1	35	0	3	1	2	4	1	5019	501901	50190101	5	1	1	132.775	1	7	456.047	454.45	447.427	421.669	434.455	476.278	454.482	503.346	440.421
792	35	1	4	50190103			1	1	1	35	35	1	1	2	35	2	3	2	2	1	3	5	501901	1	35	0	3	1	2	4	1	5019	501901	50190101	12	1	1	132.775	1	7	456.401	432.255	406.895	443.532	443.854	386.333	445.212	475.105	436.769
792	35	1	4	50190104			0	1	1	35	35	1	2	2	35	3	2	2	2	1	3	5	501901	1	35	0	3	1	2	4	1	5019	501901	50190101	6	1	1	132.775	1	7	480.961	439.702	422.883	441.26	506.373	497.617	484.662	473.315	457.351
792	35	1	4	50190105			0	1	1	35	35	1	2	2	35	2	2	3	3	3	5	5	501901	1	35	0	3	1	2	4	1	5019	501901	50190101	7	1	1	132.775	1	7	425.471	484.86	484.287	444.006	437.837	432.344	406.776	452.916	458.334
792	35	1	4	50190106			0	2	1	35	35	2	1	3	35	3	3	2	2	3	4	4	501901	1	35	0	3	1	2	4	1	5019	501901	50190101	13	1	1	132.775	1	7	286.324	325.131	323.133	345.278	285.281	350.673	305.988	338.22	245.911
792	35	1	4	50190107			0	1	1	35	35	1	1	2	35	3	2	2	2	1	3	6	501901	1	35	0	3	1	2	4	1	5019	501901	50190101	8	1	1	132.775	1	7	542.928	552.621	557.334	556.725	573.464	555.82	502.356	514.475	532.941
792	35	1	4	50190108			1	2	1	35	35	2	1	2	35	2	3	2	2	1	3	4	501901	1	35	0	3	1	2	4	1	5019	501901	50190101	9	1	1	132.775	1	7	526.451	562.174	589.752	583.772	578.136	562.596	493.469	583.329	550.834
792	35	1	4	50190109			0	2	1	35	35	2	2	3	35	3	3	2	2	2	2	1	501901	1	35	0	3	1	2	4	1	5019	501901	50190101	14	1	1	132.775	1	7	527.668	599.1	553.39	537.2	524.864	466.575	568.37	575.678	603.897
792	35	1	4	50190111			0	1	1	35	35	1	2	3	35	1	1	2	3	1	1	4	501901	1	35	0	3	1	2	4	1	5019	501901	50190101	1	1	1	132.775	1	7	403.315	454.877	428.437	471.215	492.626	503.86	428.405	507.639	467.817
792	35	1	4	50190112			1	1	1	35	35	1	1	2				9					501901	1	35	0	3	1	2	4	1	5019	501901	50190101	2	1	1	132.775	1	7	511.532	504.606	515.912	479.719	493.28	565.038	461.092	492.625	485.978
792	35	1	4	50190113			0	1	1	35	35	1	1	3	35	3	3	2	2	2	3	4	501901	1	35	0	3	1	2	4	1	5019	501901	50190101	16	1	1	132.775	1	7	614.157	583.899	571.949	604.849	608.026	636.955	580.207	642.963	607.024
792	35	1	4	50190114			0	2	1	35	35	2	1	2	35	1	2	2	3	3	4	5	501901	1	35	0	3	1	2	4	1	5019	501901	50190101	17	1	1	132.775	1	7	512.972	482.248	463.103	496.106	515.353	497.74	515.748	489.622	499.602
792	35	1	4	50190115			0	2	1	35	35	2	2	3	35	2	2	2	3	3	3	5	501901	1	35	0	3	1	2	4	1	5019	501901	50190101	3	1	1	132.775	1	7	546.204	539.379	487.502	476.902	515.82	487.954	503.112	498.296	475.094
792	35	4	1	50200402			0	1	2	35	35	1	2	2	35	2	2	3	3	3	5	4	502001	1	35	0	2	1	2	4	1	5020	502004	50200101	15	1	1	118.151	1	88	387.077	362.848	334.306	391.668	339.304	386.759	343.927	340.075	348.519
792	35	4	1	50200404			0	1	2	35	35	1	1	2	35	2	3	2	2	2	3	3	502001	1	35	0	2	1	2	4	1	5020	502004	50200101	16	1	1	118.151	1	88	598.801	596.778	523.882	475.271	512.335	563.305	541.726	568.757	541.339
792	35	4	1	50200405			1	2	2	35	35	2	1	3	35	2	2	2	3	3	5	3	502001	1	35	0	2	1	2	4	1	5020	502004	50200101	3	1	1	118.151	1	88	386.182	341.989	411.618	347.675	382.109	433.325	354.876	374.651	384.462
792	35	4	1	50200407			1	1	2	35	35	1	2	2	35	3	2	2	2	2	2	2	502001	1	35	0	2	1	2	4	1	5020	502004	50200101	17	1	1	118.151	1	88	564.977	550.23	530.256	517.508	471.983	493.748	504.066	558.84	546.705
792	35	4	1	50200408			0	2	2	35	35	2	1	2	35	3	3	2	2	2	4	4	502001	1	35	0	2	1	2	4	1	5020	502004	50200101	5	1	1	118.151	1	88	496.783	481.242	488.459	449.345	472.487	464.032	467.724	477.477	491.301
792	35	4	1	50200411			0	1	2	35	35	1	3	3	35	3	3	2	3	3	5	4	502001	1	35	0	2	1	2	4	1	5020	502004	50200101	18	1	1	118.151	1	88	555.915	583.926	577.08	621.866	656.456	620.454	571.455	715.947	625.328
792	35	4	1	50200412			0	2	2	35	35	2	2	3	35	3	3	2	2	2	2	4	502001	1	35	0	2	1	2	4	1	5020	502004	50200101	7	1	1	118.151	1	88	506.054	500.572	499.147	495.291	517.332	484.322	515.847	512.47	503.019
792	35	4	1	50200413			1	2	2	35	35	2	2	2	35	5	5	2	2	1	3	4	502001	1	35	0	2	1	2	4	1	5020	502004	50200101	8	1	1	118.151	1	88	466.583	492.892	447.158	453.133	491.49	462.905	446.384	468.42	487.655
792	35	4	1	50200414			1	2	2	35	35	2	2	2	35	3	4	2	2	1	2	4	502001	1	35	0	2	1	2	4	1	5020	502004	50200101	10	1	1	118.151	1	88	592.048	563.053	532.828	490.009	556.545	492.616	550.218	569.058	529.339
792	35	4	1	50200415			0	1	2	35	35	1	3	2	35	3	4	2	2	1	2	4	502001	1	35	0	2	1	2	4	1	5020	502004	50200101	9	1	1	118.151	1	88	599.154	558.797	514	551.773	586.864	551.619	552.36	586.319	608.185
792	35	4	1	50200416			0	1	2	35	35	1	1	2	35	3	3	2	1	2	1	1	502001	1	35	0	2	1	2	4	1	5020	502004	50200101	11	1	1	118.151	1	88	614.288	562.122	534.629	593.798	537.123	610.751	594.05	551.368	532.031
792	35	4	1	50200417			0	2	2	35	35	2	1	2	35	4	4	2	1	2	1	3	502001	1	35	0	2	1	2	4	1	5020	502004	50200101	12	1	1	118.151	1	88	494.181	467.308	501.293	499.051	429.226	477.918	514.689	442.215	535.897
792	35	4	1	50200418			0	2	2	35	35	2	1	2	35	3	3	2	2	1	3	3	502001	1	35	0	2	1	2	4	1	5020	502004	50200101	18	1	1	118.151	1	88	616.545	655.22	599.665	596.141	669.255	577.365	558.634	575.046	519.477
792	35	4	1	50200419			0	2	2	35	35	2	1	2	35	5	4	2	2	2	3	3	502001	1	35	0	2	1	2	4	1	5020	502004	50200101	1	1	1	118.151	1	88	429.068	447.287	425.228	450.501	431.682	441.365	428.375	381.799	360.826
792	35	4	1	50200420			0	2	2	35	35	2	1	3	35	5	4	2	2	2	3	4	502001	1	35	0	2	1	2	4	1	5020	502004	50200101	10	1	1	118.151	1	88	449.377	453.162	462.903	475.95	405.494	460.553	450.437	462.503	488.019
792	35	4	1	50200422			0	2	2	35	35	2	1	2	35	3	2	2	3	2	4	4	502001	1	35	0	2	1	2	4	1	5020	502004	50200101	3	1	1	118.151	1	88	570.41	580.609	558.944	546.39	557.527	604.416	635.172	593.862	543.164
792	35	4	1	50200424			0	2	2	35	35	2	1	2	35	2	3	2	2	2	2	3	502001	1	35	0	2	1	2	4	1	5020	502004	50200101	13	1	1	118.151	1	88	604.409	533.328	548.614	548.069	543.959	549.94	537.399	576.316	567.228
792	35	4	1	50200427			1	2	2	35	35	2	2	2	35	4	3	2	2	2	2	2	502001	1	35	0	2	1	2	4	1	5020	502004	50200101	5	1	1	118.151	1	88	538.718	567.959	550.642	525.541	543.115	548.214	558.669	569.122	531.02
792	35	4	1	50200428			1	1	2	35	35	1	2	9	35	4	3	2	2	2	4	6	502001	1	35	0	2	1	2	4	1	5020	502004	50200101	15	1	1	118.151	1	88	485.12	496.036	470.768	477.166	419.253	535.251	492.008	479.636	485.104
792	35	4	1	50200429			0	2	2	35	35	2	1	2	35	4	5	2	2	3	5	4	502001	1	35	0	2	1	2	4	1	5020	502004	50200101	16	1	1	118.151	1	88	502.976	518.964	523.299	503.255	461.519	511.729	471.348	449.411	521.363
792	35	4	1	50200430			1	1	2	35	35	1	2	2	35	1	1	2	3	2	3	6	502001	1	35	0	2	1	2	4	1	5020	502004	50200101	6	1	1	118.151	1	88	556.076	558.489	532.978	564.044	580.032	555.07	512.201	528.95	512.997
792	35	4	1	50200432			0	1	2	35	35	1	1	3	35	2	2	2	3	3	5	4	502001	1	35	0	2	1	2	4	1	5020	502004	50200101	17	1	1	118.151	1	88	380.956	392.11	391.796	366.432	397.999	384.639	433.909	400.826	360.409
792	35	4	1	50200436			0	1	2	35	35	1	3	2	35	1	1	3	3	3	5	5	502001	1	35	0	2	1	2	4	1	5020	502004	50200101	1	1	1	118.151	1	88	467.446	433.097	447.634	430.123	368.723	469.445	464.327	383.14	381.866
792	35	4	1	50200437			0	1	2	35	35	1	2	3	35	2	1	2	2	2	2	3	502001	1	35	0	2	1	2	4	1	5020	502004	50200101	2	1	1	118.151	1	88	521.032	483.776	549.159	511.609	510.245	571.639	482.339	501.697	564.048
792	35	4	1	50200438			0	2	2	35	35	2	1	2	35	4	5	2	2	2	4	4	502001	1	35	0	2	1	2	4	1	5020	502004	50200101	10	1	1	118.151	1	88	591.355	632.643	592.135	628.582	571.536	566.677	607.077	588.973	562.345
792	35	4	1	50200439			0	1	2	35	35	1	1	2	35	4	3	2	2	2	1	4	502001	1	35	0	2	1	2	4	1	5020	502004	50200101	11	1	1	118.151	1	88	516.179	498.419	469.496	530.715	526.535	521.652	498.509	506.307	521.343
792	35	4	1	50200441			1	1	2	35	35	1	2	3	35	2	1	2	3	2	2	5	502001	1	35	0	2	1	2	4	1	5020	502004	50200101	13	1	1	118.151	1	88	572.992	559.661	525.308	574.073	525.309	582.391	546.595	605.416	563.118
792	35	4	1	50200445			1	2	2	35	35	2	2	3	35	2	2	2	2	3	1	1	502001	1	35	0	2	1	2	4	1	5020	502004	50200101	16	1	1	118.151	1	88	537.122	508.133	519.243	502.99	561.273	518.119	559.487	572.53	500.17
792	35	4	1	50200801			0	2	1	35	35	2	2	2	35	1	1	3	3	2	5	6	502002	2	35	0	2	1	2	4	1	5020	502008	50200202	17	1	1	140.148	1	88	440.809	467.01	470.763	470.341	470.044	489.017	510.658	466.794	525.112
792	35	4	1	50200803			0	1	1	35	35	1	1	2	35	3	3	2	2	1	4	3	502002	2	35	0	2	1	2	4	1	5020	502008	50200202	4	1	1	140.148	1	88	585.581	512.752	578.306	539.647	568.362	577.422	557.24	626.686	570.295
792	35	4	1	50200804			1	1	1	35	35	1	1	2	35	3	3	2	2	3	2	3	502002	2	35	0	2	1	2	4	1	5020	502008	50200202	10	1	1	140.148	1	88	483.344	475.397	492.974	500.137	491.886	548.997	448.461	514.391	526.888
792	35	4	1	50200806			0	2	1	35	35	2	3	2	35	2	2	2	3	3	5	3	502002	2	35	0	2	1	2	4	1	5020	502008	50200202	11	1	1	140.148	1	88	394.334	393.71	401.503	379.03	379.985	349.356	421.581	395.38	389.826
792	35	4	1	50200807			0	2	1	35	35	2	2	3	35	3	4	2	2	2	3	3	502002	2	35	0	2	1	2	4	1	5020	502008	50200202	6	1	1	140.148	1	88	573.643	578.996	565.891	545.442	550.578	543.485	543.935	507.086	585.952
792	35	4	1	50200809			0	1	1	35	35	1	2	2	35	4	5	2	2	1	5	4	502002	2	35	0	2	1	2	4	1	5020	502008	50200202	7	1	1	140.148	1	88	576.08	556.859	594.96	548.919	546.184	550.397	573.436	579.676	570.871
792	35	4	1	50200810			0	1	1	35	35	1	1	3	35	2	2	2	3	3	3	4	502002	2	35	0	2	1	2	4	1	5020	502008	50200202	8	1	1	140.148	1	88	429.897	443.923	454.605	410.306	436.398	445.95	397.526	419.068	415.965
792	35	4	1	50200812			0	2	1	35	35	2	3	2	35	4	5	2	2	3	4	3	502002	2	35	0	2	1	2	4	1	5020	502008	50200202	13	1	1	140.148	1	88	465.237	460.108	547.587	502.274	526.449	453.993	541.469	492.567	508.834
792	35	4	1	50200814			1	1	1	35	35	1	2	2	35	3	3	2	2	3	5	3	502002	2	35	0	2	1	2	4	1	5020	502008	50200202	2	1	1	140.148	1	88	711.459	649.592	624.965	606.292	616.578	615.642	654.772	633.178	567.765
792	35	4	1	50200815			0	2	1	35	35	2	3	1	35	2	2	3	3	3	3	5	502002	2	35	0	2	1	2	4	1	5020	502008	50200202	3	1	1	140.148	1	88	448.164	443.869	385.276	401.165	491.002	469.466	428.891	412.567	452.501
792	35	4	1	50200817			0	1	1	35	35	1	1	3	35	3	2	2	3	3	4	5	502002	2	35	0	2	1	2	4	1	5020	502008	50200202	14	1	1	140.148	1	88	520.243	554.387	529.044	540.472	558.222	513.787	473.407	568.813	549.536
792	35	4	1	50200819			0	2	1	35	35	2	2	2	35	4	4	2	2	3	2	3	502002	2	35	0	2	1	2	4	1	5020	502008	50200202	15	1	1	140.148	1	88	539.439	549.085	505.138	502.655	544.072	510.987	581.378	566.913	504.854
792	35	4	1	50200820			1	1	1	35	35	1	1	1	35	3	3	2	2	3	4	4	502002	2	35	0	2	1	2	4	1	5020	502008	50200202	16	1	1	140.148	1	88	501.129	512.933	460.052	468.99	515.202	451.827	435.143	466.101	471.789
792	35	4	1	50200822			0	1	1	35	35	1	2	3	35	2	2	3	3	3	5	6	502002	2	35	0	2	1	2	4	1	5020	502008	50200202	17	1	1	140.148	1	88	477.891	423.933	493.933	478.585	456.46	432.868	451.716	492.005	506.868
792	35	4	1	50200824			0	1	1	35	35	1	2	2	35	3	2	2	2	1	1	4	502002	2	35	0	2	1	2	4	1	5020	502008	50200202	5	1	1	140.148	1	88	507.202	481.433	499.524	483.124	505.364	467.992	490.934	422.684	476.022
792	35	4	1	50200826			1	1	1	35	35	1	1	1	35	3	4	2	2	3	4	6	502002	2	35	0	2	1	2	4	1	5020	502008	50200202	7	1	1	140.148	1	88	506.294	531.067	479.547	454.948	489.084	510.439	537.323	492.778	503.372
792	35	4	1	50200831			0	1	1	35	35	1	2	1				9					502002	2	35	0	2	1	2	4	1	5020	502008	50200202	11	1	1	140.148	1	88	306.891	276.803	301.954	260.53	339.351	330.867	268.01	281.165	256.177
792	35	4	1	50200832			0	2	1	35	35	2	1	2	35	1	2	2	3	3	5	5	502002	2	35	0	2	1	2	4	1	5020	502008	50200202	2	1	1	140.148	1	88	467.263	374.698	407.07	403.121	402.768	434.097	426.927	410.065	438.282
792	35	4	1	50200834			0	2	1	35	35	2	2	3	35	4	5	1	1	1	1	1	502002	2	35	0	2	1	2	4	1	5020	502008	50200202	13	1	1	140.148	1	88	525.843	517.764	508.251	546.901	562.53	499.319	543.222	559.96	504.313
792	35	4	1	50200835			0	2	1	35	35	2	3	3	35	4	3	2	1	1	1	2	502002	2	35	0	2	1	2	4	1	5020	502008	50200202	3	1	1	140.148	1	88	527.816	539.394	514.351	529.511	516.394	473.532	520.8	495.589	574.712
792	35	4	1	50200837			0	2	1	35	35	2	2	2	35	3	1	2	2	3	3	3	502002	2	35	0	2	1	2	4	1	5020	502008	50200202	4	1	1	140.148	1	88	505.638	484.704	523.427	506.273	503.624	505.007	504.739	547.263	524.26
792	35	4	1	50200839			0	2	1	35	35	2	1	3	35	2	5	2	2	3	4	3	502002	2	35	0	2	1	2	4	1	5020	502008	50200202	15	1	1	140.148	1	88	490.884	535.594	511.023	475.722	552.506	605.87	535.082	609.054	549.52
792	35	4	1	50200845			1	2	1	35	35	2	2	2	35	2	3	2	3	3	5	4	502002	2	35	0	2	1	2	4	1	5020	502008	50200202	6	1	1	140.148	1	88	502.847	470.745	422.869	484.635	506.576	508.925	447.391	524.958	489.6
792	35	1	4	50210201			0	1	1	35	35	1	1	3	35	5	4	9	1	2	9	9	502101	1	35	0	2	1	2	4	1	5021	502102	50210101	7	1	1	289.298	1	41	391.979	471.875	491.371	479.672	404.274	470.295	474.773	441.024	438.553
792	35	1	4	50210202			0	2	1	35	35	2	3	3	35	3	4	2	2	2	1	3	502101	1	35	0	2	1	2	4	1	5021	502102	50210101	8	1	1	289.298	1	41	504.147	511.066	506.857	469.945	503.591	527.622	496.574	462.682	481.641
792	35	1	4	50210203			1	2	1	35	35	2	3	3	35	4	4	1	1	3	1	3	502101	1	35	0	2	1	2	4	1	5021	502102	50210101	9	1	1	289.298	1	41	657.365	576.337	638.778	643.706	617.542	600.508	617.459	603.599	638.374
792	35	1	4	50210204			0	2	1	35	35	2	2	3	35	2	4	2	2	1	1	2	502101	1	35	0	2	1	2	4	1	5021	502102	50210101	18	1	1	289.298	1	41	465.846	441.017	552.879	561.157	525.279	537.85	504.15	471.235	481.335
792	35	1	4	50210205			1	1	1	35	35	1	2	2	35	2	2	2	3	3	4	7	502101	1	35	0	2	1	2	4	1	5021	502102	50210101	1	1	1	289.298	1	41	490.518	476.094	502.71	484.235	517.157	528.896	506.28	484.424	509.415
792	35	1	4	50210206			0	2	1	35	35	2	2	2	35	5	5	1	1	1	1	1	502101	1	35	0	2	1	2	4	1	5021	502102	50210101	10	1	1	289.298	1	41	564.939	645.42	582.448	566.851	640.878	605.293	585.804	593.93	650.625
792	35	1	4	50210209			0	2	1	35	35	2	2	3	35	5	5	1	1	1	1	1	502101	1	35	0	2	1	2	4	1	5021	502102	50210101	3	1	1	289.298	1	41	547.738	569.98	539.215	567.816	545.384	533.326	558.609	611.28	605.13
792	35	1	4	50210210			0	2	1	35	35	2	1	2	35	5	4	1	1	1	1	1	502101	1	35	0	2	1	2	4	1	5021	502102	50210101	4	1	1	289.298	1	41	509.163	480.159	529.842	437.874	524.549	487.743	495.173	516.368	513.357
792	35	1	4	50210211			0	1	1	35	35	1	1	3	35	5	4	2	1	1	1	4	502101	1	35	0	2	1	2	4	1	5021	502102	50210101	12	1	1	289.298	1	41	557.823	620.188	585.767	614.3	595.413	576.183	605.213	613.757	622.741
792	35	1	4	50210212			0	2	1	35	35	2	3	3	35	4	3	1	1	2	1	1	502101	1	35	0	2	1	2	4	1	5021	502102	50210101	13	1	1	289.298	1	41	583.416	598.968	575.374	637.438	664.777	503.8	604.866	574.294	643.05
792	35	1	4	50210213			1	2	1	35	35	2	2	2	35	3	4	2	2	2	2	2	502101	1	35	0	2	1	2	4	1	5021	502102	50210101	5	1	1	289.298	1	41	528.366	578.817	522.017	571.426	524.493	544.463	526.301	583.797	619.827
792	35	1	4	50210402			0	1	1	35	35	1	1	3	35	5	5	1	1	2	1	1	502102	2	35	0	1	1	2	4	1	5021	502104	50210202	14	1	1	289.298	1	41	533.351	542.118	588.929	508.707	592.127	502.733	540.204	555.584	553.783
792	35	1	4	50210404			0	2	1	35	35	2	1	3	35	3	4	1	1	9	1	1	502102	2	35	0	1	1	2	4	1	5021	502104	50210202	15	1	1	289.298	1	41	430.765	493.398	482.792	445.669	439.5	520.897	460.799	496.083	490.713
792	35	1	4	50210405			0	1	1	35	35	1	2	3	35	3	4	1	1	2	1	1	502102	2	35	0	1	1	2	4	1	5021	502104	50210202	7	1	1	289.298	1	41	485.392	397.97	434.385	405.013	419.744	458.958	453.532	460.506	453.218
792	35	1	4	50210406			1	2	1	35	35	2	1	3	35	3	3	2	2	2	1	3	502102	2	35	0	1	1	2	4	1	5021	502104	50210202	16	1	1	289.298	1	41	537.591	522.948	548.114	520.773	578.573	404.127	491.741	525.919	501.307
792	35	1	4	50210407			0	1	1	35	35	1	1	2	35	5	4	1	1	1	1	1	502102	2	35	0	1	1	2	4	1	5021	502104	50210202	17	1	1	289.298	1	41	576.344	621.249	561.43	601.216	565.285	608.788	536.042	583.07	537.741
792	35	4	1	50220501			1	2	1	35	35	2	2	1	35	2	3	3	3	1	5	5	502201	1	35	0	2	1	2	4	1	5022	502205	50220101	4	1	1	149.872	0	65	497.927	525.674	498.736	513.849	484.805	488.391	494.826	537.177	515.417
792	35	4	1	50220502			0	1	1	35	35	1	2	1	35	3	2	2	3	2	5	7	502201	1	35	0	2	1	2	4	1	5022	502205	50220101	10	1	1	149.872	0	65	498.903	476.036	484.215	514.079	459.612	513.561	523.516	470.949	479.461
792	35	4	1	50220504			1	1	1	35	35	1	1	2	35	3	4	2	2	3	3	3	502201	1	35	0	2	1	2	4	1	5022	502205	50220101	11	1	1	149.872	0	65	597.816	593.818	585.43	572.348	590.823	558.01	673.622	621.759	563.485
792	35	4	1	50220505			1	1	1	35	35	1	1	2	35	4	4	2	2	2	4	5	502201	1	35	0	2	1	2	4	1	5022	502205	50220101	6	1	1	149.872	0	65	615.807	583.403	549.4	542.243	572.884	588.531	519.534	567.631	586.11
792	35	4	1	50220507			0	1	1	35	35	1	1	3	35	3	2	2	2	2	2	3	502201	1	35	0	2	1	2	4	1	5022	502205	50220101	13	1	1	149.872	0	65	509.559	457.007	530.815	507.908	534.259	516.55	494.133	488.175	501.695
792	35	4	1	50220509			1	1	1	35	35	1	2	3	35	1	1	2	3	2	5	5	502201	1	35	0	2	1	2	4	1	5022	502205	50220101	8	1	1	149.872	0	65	251.707	390.031	325.428	309.832	307.11	375.706	358.178	381.397	218.97
792	35	4	1	50220510			0	2	1	35	35	2	1	3	35	3	4	1	1	3	1	1	502201	1	35	0	2	1	2	4	1	5022	502205	50220101	14	1	1	149.872	0	65	595.728	563.24	598.203	545.156	592.182	572.635	648.33	648.728	571.609
792	35	4	1	50220511			1	2	1	35	35	2	2	2	35	2	1	2	2	2	3	1	502201	1	35	0	2	1	2	4	1	5022	502205	50220101	15	1	1	149.872	0	65	436.915	408.636	442.212	416.537	442.208	450.628	443.592	435.158	342.103
792	35	4	1	50220512			0	2	1	35	35	2	1	1	35	1	1	3	3	3	5	5	502201	1	35	0	2	1	2	4	1	5022	502205	50220101	16	1	1	149.872	0	65	446.104	493.935	404.876	418.949	415.942	459.788	468.742	378.505	405.598
792	35	4	1	50220513			1	1	1	35	35	1	2	1	35	3	2	2	2	2	3	4	502201	1	35	0	2	1	2	4	1	5022	502205	50220101	17	1	1	149.872	0	65	388.007	387.325	351.617	353.012	365.993	380.511	322.206	341.778	360.017
792	35	4	1	50220514			0	2	1	35	35	2	3	2	35	9	9	9	9	9	9	9	502201	1	35	0	2	1	2	4	1	5022	502205	50220101	18	1	1	149.872	0	65	412.833	385.993	479.091	439.306	392.089	436.976	463.816	474.31	442.348
792	35	4	1	50220515			1	1	1	35	35	1	1	2	35	3	2	2	2	1	2	2	502201	1	35	0	2	1	2	4	1	5022	502205	50220101	9	1	1	149.872	0	65	504.978	550.193	500.665	524.463	491.457	509.117	543.846	475.824	509.734
792	35	4	1	50220516			1	1	1	35	35	1	2	2	35	9	2	3	3	2	4	4	502201	1	35	0	2	1	2	4	1	5022	502205	50220101	10	1	1	149.872	0	65	333.688	364.276	332.554	353.404	404.373	313.687	343.203	405.108	304.812
792	35	4	1	50220517			0	1	1	35	35	1	1	3	35	1	1	2	3	2	3	4	502201	1	35	0	2	1	2	4	1	5022	502205	50220101	11	1	1	149.872	0	65	462.337	485.422	470.985	486.393	495.069	473.67	456.523	432.191	473.874
792	35	4	1	50220518			0	2	1	35	35	2	2	3	35	3	2	2	2	2	3	3	502201	1	35	0	2	1	2	4	1	5022	502205	50220101	12	1	1	149.872	0	65	520.521	549.947	487.372	537.279	592.215	518.094	503.098	523.407	496.962
792	35	4	1	50220519			0	2	1	35	35	2	1	2	35	2	2	3	3	2	5	4	502201	1	35	0	2	1	2	4	1	5022	502205	50220101	1	1	1	149.872	0	65	404.572	427.246	428.183	401.028	449.349	406.018	324.724	424.161	374.984
792	35	4	1	50220520			0	2	1	35	35	2	1	3	35	3	1	2	2	2	3	9	502201	1	35	0	2	1	2	4	1	5022	502205	50220101	2	1	1	149.872	0	65	447.561	423.275	435.65	436.364	434.745	441.328	446.216	386.211	459.506
792	35	4	1	50220521			0	2	1	35	35	2	2	2	35	1	1	3	3	2	5	3	502201	1	35	0	2	1	2	4	1	5022	502205	50220101	3	1	1	149.872	0	65	426.065	409.885	376.397	381.042	422.954	391.044	368.073	386.882	388.351
792	35	4	1	50220522			0	1	1	35	35	1	1	3	35	2	2	2	3	2	3	4	502201	1	35	0	2	1	2	4	1	5022	502205	50220101	4	1	1	149.872	0	65	549.049	535.083	583.799	550.286	598.624	588.537	572.359	580.898	524.095
792	35	4	1	50220523			1	1	1	35	35	1	1	2	35	1	1	2	3	2	2	5	502201	1	35	0	2	1	2	4	1	5022	502205	50220101	13	1	1	149.872	0	65	571.201	461.936	470.455	528.071	536.154	585.99	546.036	547.825	516.239
792	35	4	1	50220524			0	1	1	35	35	1	1	2	35	1	3	2	3	2	4	6	502201	1	35	0	2	1	2	4	1	5022	502205	50220101	5	1	1	149.872	0	65	465.785	449.637	428.831	445.508	462.45	474.253	476.817	468.655	485.351
792	35	4	1	50220525			0	1	1	35	35	1	1	3	35	4	4	2	2	2	3	5	502201	1	35	0	2	1	2	4	1	5022	502205	50220101	6	1	1	149.872	0	65	614.309	612.064	584.76	565.143	604.53	597.623	638.57	591.874	614.141
792	35	4	1	50220526			0	2	1	35	35	2	1	2	35	1	2	3	3	2	5	6	502201	1	35	0	2	1	2	4	1	5022	502205	50220101	14	1	1	149.872	0	65	457.811	457.838	485.48	465.424	476.082	466.336	510.542	469.198	437.689
792	35	4	1	50220528			0	2	1	35	35	2	1	2	35	2	2	2	2	2	9	6	502201	1	35	0	2	1	2	4	1	5022	502205	50220101	8	1	1	149.872	0	65	302.286	367.374	322.983	392.418	400.826	367.424	385.23	345.913	400.665
792	35	4	1	50221201			0	2	1	35	35	2	1	2	35	2	1	2	3	2	4	3	502202	2	35	0	3	1	2	4	1	5022	502212	50220202	15	1	1	168.418	0	65	547.569	544.107	519.737	514.591	498.205	565.759	517.43	577.457	588.445
792	35	4	1	50221202			1	1	1	35	35	1	1	2	35	1	2	2	3	2	3	4	502202	2	35	0	3	1	2	4	1	5022	502212	50220202	16	1	1	168.418	0	65	364.509	422.459	328.793	359.098	387.047	358.336	393.504	353.471	351.3
792	35	4	1	50221204			0	2	1	35	35	2	2	3	35	1	1	2	3	2	2	4	502202	2	35	0	3	1	2	4	1	5022	502212	50220202	1	1	1	168.418	0	65	554.125	569.094	579.619	554.244	577.352	597.562	555.572	572.433	572.688
792	35	4	1	50221205			0	2	1	35	35	2	1	3	35	1	2	2	3	2	3	4	502202	2	35	0	3	1	2	4	1	5022	502212	50220202	17	1	1	168.418	0	65	580.009	563.161	561.234	591.721	598.554	581.237	525.045	577.733	545.037
792	35	4	1	50221208			1	1	1	35	35	1	1	2	35	4	5	2	2	1	3	3	502202	2	35	0	3	1	2	4	1	5022	502212	50220202	18	1	1	168.418	0	65	611.245	610.103	649.85	689.741	617.565	642.203	633.797	654.846	622.869
792	35	4	1	50221209			1	1	1	35	35	1	1	3	35	4	4	2	2	1	5	4	502202	2	35	0	3	1	2	4	1	5022	502212	50220202	3	1	1	168.418	0	65	556.066	566.791	642.13	574.865	621.648	564.72	575.09	622.994	579.279
792	35	4	1	50221210			0	2	1	35	35	2	1	1	35	3	2	2	2	2	1	3	502202	2	35	0	3	1	2	4	1	5022	502212	50220202	10	1	1	168.418	0	65	467.922	510.333	532.893	515.705	500.979	477.34	521.608	509.664	541.093
792	35	4	1	50221211			0	2	1	35	35	2	1	2	35	3	2	2	3	2	5	3	502202	2	35	0	3	1	2	4	1	5022	502212	50220202	11	1	1	168.418	0	65	578.852	545.926	642.979	578.587	570.276	536.674	585.12	565.327	586.851
792	35	4	1	50221212			0	1	1	35	35	1	1	3	35	2	1	2	2	1	3	2	502202	2	35	0	3	1	2	4	1	5022	502212	50220202	4	1	1	168.418	0	65	536.767	527.396	571.351	521.723	510.663	555.508	532.25	544.989	536.212
792	35	4	1	50221213			1	1	1	35	35	1	1	1	35	3	4	2	2	2	3	3	502202	2	35	0	3	1	2	4	1	5022	502212	50220202	12	1	1	168.418	0	65	489.468	512.659	534.231	494.584	558.282	553.114	518.19	514.084	540.811
792	35	4	1	50221214			0	1	1	35	35	1	1	3	35	2	2	2	2	2	3	2	502202	2	35	0	3	1	2	4	1	5022	502212	50220202	13	1	1	168.418	0	65	562.33	635.783	612.958	615.299	623.907	622.685	637.868	660.088	612.424
792	35	4	1	50221215			0	2	1	35	35	2	2	2	35	3	4	2	2	2	3	4	502202	2	35	0	3	1	2	4	1	5022	502212	50220202	5	1	1	168.418	0	65	443.673	483.174	499.172	516.871	516.795	517.042	550.683	479.018	515.612
792	35	4	1	50221217			1	1	1	35	35	1	1	3	35	1	2	2	3	1	5	9	502202	2	35	0	3	1	2	4	1	5022	502212	50220202	15	1	1	168.418	0	65	530.196	493.842	509.159	476.778	467.462	576.474	492.091	554.621	492.269
792	35	4	1	50221218			0	1	1	35	35	1	1	2	35	4	5	2	1	3	2	3	502202	2	35	0	3	1	2	4	1	5022	502212	50220202	16	1	1	168.418	0	65	510.169	532.396	539.169	510.528	518.932	583.548	557.723	491.891	549.818
792	35	4	1	50221219			0	1	1	35	35	1	2	1	35	2	2	2	3	2	4	9	502202	2	35	0	3	1	2	4	1	5022	502212	50220202	17	1	1	168.418	0	65	496.525	501.717	485.341	457.01	463.56	501.35	454.026	497.135	457.751
792	35	4	1	50221221			0	2	1	35	35	2	1	2	35	2	3	2	2	2	1	6	502202	2	35	0	3	1	2	4	1	5022	502212	50220202	7	1	1	168.418	0	65	549.473	534.072	516.257	502.396	594.157	560.05	570.992	517.825	577.133
792	35	4	1	50221222			0	1	1	35	35	1	1	2	35	3	1	2	3	1	3	6	502202	2	35	0	3	1	2	4	1	5022	502212	50220202	18	1	1	168.418	0	65	538.431	614.182	612.004	589.785	643.999	576.58	590.705	693.884	571.045
792	35	4	1	50221223			0	2	1	35	35	2	1	3	35	1	3	2	3	1	4	4	502202	2	35	0	3	1	2	4	1	5022	502212	50220202	8	1	1	168.418	0	65	577.409	543.267	609.85	627.327	583.128	595.528	584.738	566.161	566.414
792	35	4	1	50221224			1	1	1	35	35	1	1	1	35	1	1	3	3	3	5	4	502202	2	35	0	3	1	2	4	1	5022	502212	50220202	9	1	1	168.418	0	65	464.65	457.111	420.968	484.799	472.169	393.237	420.115	470.238	464.396
792	35	4	1	50221225			1	2	1	35	35	2	1	3	35	4	5	2	2	1	4	3	502202	2	35	0	3	1	2	4	1	5022	502212	50220202	1	1	1	168.418	0	65	526.573	548.201	544.842	533.358	525.749	504.155	448.456	462.969	505.114
792	35	4	1	50221227			0	2	1	35	35	2	2	3	35	3	3	2	2	2	4	4	502202	2	35	0	3	1	2	4	1	5022	502212	50220202	2	1	1	168.418	0	65	394.759	401.404	434.964	431.111	424.786	437.052	437.653	366.917	473.889
792	35	4	1	50221228			0	1	1	35	35	1	1	2	35	5	5	2	1	2	2	3	502202	2	35	0	3	1	2	4	1	5022	502212	50220202	3	1	1	168.418	0	65	639.642	626.194	567.857	638.755	574.901	637.111	585.17	602.961	610.972
792	35	4	1	50221229			1	2	1	35	35	2	1	2	35	2	1	2	3	1	3	9	502202	2	35	0	3	1	2	4	1	5022	502212	50220202	4	1	1	168.418	0	65	528.694	552.794	583.015	593.066	534.135	570.304	539.325	588.117	522.188
792	35	1	4	50230101			0	1	1	35	35	1	1	3	35	3	2	2	3	1	4	6	502301	1	35	0	2	1	2	4	1	5023	502301	50230101	11	1	1	99.5359	1	17	540.333	565.219	511.54	525.774	551.121	495.026	541.169	552.923	518.589
792	35	1	4	50230102			0	1	1	35	35	1	1	3	35	3	4	2	2	1	3	4	502301	1	35	0	2	1	2	4	1	5023	502301	50230101	12	1	1	99.5359	1	17	563.937	558.349	673.313	562.456	635.561	580.772	671.775	550.164	580.361
792	35	1	4	50230103			1	2	1	35	35	2	2	3	35	3	2	2	2	2	3	2	502301	1	35	0	2	1	2	4	1	5023	502301	50230101	13	1	1	99.5359	1	17	426.744	377.705	383.249	395.505	356.96	372.385	401.592	393.003	361.222
792	35	1	4	50230104			0	2	1	35	35	2	2	3	35	5	5	1	1	1	1	3	502301	1	35	0	2	1	2	4	1	5023	502301	50230101	3	1	1	99.5359	1	17	581.952	598.923	684.939	668.149	677.983	686.136	598.991	686.345	717.98
792	35	1	4	50230105			0	2	1	35	35	2	2	2	35	4	3	2	2	2	5	9	502301	1	35	0	2	1	2	4	1	5023	502301	50230101	14	1	1	99.5359	1	17	431.266	385.937	396.151	392.663	420.173	395.394	422.905	375.644	446.587
792	35	1	4	50230108			1	1	1	35	35	1	1	2	35	5	5	1	1	2	1	1	502301	1	35	0	2	1	2	4	1	5023	502301	50230101	15	1	1	99.5359	1	17	544.106	519.072	504.118	499.552	530.654	515.955	500.8	512.091	473.58
792	35	1	4	50230109			0	2	1	35	35	2	2	3	35	4	4	2	2	2	4	2	502301	1	35	0	2	1	2	4	1	5023	502301	50230101	16	1	1	99.5359	1	17	645.77	647.191	620.526	624.075	654.883	563.038	564.228	640.985	561.772
792	35	1	4	50230110			0	1	1	35	35	1	3	3	35	3	3	2	2	2	5	2	502301	1	35	0	2	1	2	4	1	5023	502301	50230101	6	1	1	99.5359	1	17	440.423	441.529	412.762	457.688	464.737	507.339	470.802	435.886	439.704
792	35	1	4	50230111			1	1	1	35	35	1	2	2	35	4	5	2	1	1	2	3	502301	1	35	0	2	1	2	4	1	5023	502301	50230101	7	1	1	99.5359	1	17	565.258	592.019	536.667	530.78	521.758	555.413	567.142	578.686	574.611
792	35	1	4	50230113			0	2	1	35	35	2	2	2	35	3	3	2	2	2	2	2	502301	1	35	0	2	1	2	4	1	5023	502301	50230101	18	1	1	99.5359	1	17	369.764	459.625	446.02	420.878	424.524	393.216	396.354	407.367	406.174
792	35	1	4	50230114			0	2	1	35	35	2	1	3	35	3	2	2	2	3	5	2	502301	1	35	0	2	1	2	4	1	5023	502301	50230101	8	1	1	99.5359	1	17	447.497	524.328	460.548	460.533	428.449	523.898	490.294	511.056	428.755
792	35	1	4	50230115			0	1	1	35	35	1	2	3	35	3	3	2	2	3	3	2	502301	1	35	0	2	1	2	4	1	5023	502301	50230101	9	1	1	99.5359	1	17	499.215	499.812	384.876	508.666	539.972	475.45	472.527	487.53	471.204
792	35	1	4	50230116			1	1	1	35	35	1	2	2	35	4	4	2	2	2	3	4	502301	1	35	0	2	1	2	4	1	5023	502301	50230101	1	1	1	99.5359	1	17	480.856	509.209	456.2	504.071	469.25	532.978	498.325	457.665	478.267
792	35	1	4	50230117			0	1	1	35	35	1	3	2	35	5	5	2	1	2	4	2	502301	1	35	0	2	1	2	4	1	5023	502301	50230101	2	1	1	99.5359	1	17	516.852	535.654	548.465	555.049	486.098	537.949	509.317	544.484	527.229
792	35	1	4	50230118			0	1	1	35	35	1	3	3	35	5	4	2	1	2	2	2	502301	1	35	0	2	1	2	4	1	5023	502301	50230101	10	1	1	99.5359	1	17	610.234	661.35	621.904	584.479	575.011	689.287	695.322	672.256	687.379
792	35	1	4	50230119			1	1	1	35	35	1	3	3	35	3	4	2	2	1	2	3	502301	1	35	0	2	1	2	4	1	5023	502301	50230101	11	1	1	99.5359	1	17	503.038	510.811	499.847	493.326	492.993	486.147	446.859	439.266	436.175
792	35	1	4	50230120			1	2	1	35	35	2	3	3	35	5	5	1	1	1	1	1	502301	1	35	0	2	1	2	4	1	5023	502301	50230101	3	1	1	99.5359	1	17	563.739	625.877	612.868	575.945	595.498	628.022	594.75	555.829	522.47
792	35	1	4	50230121			0	2	1	35	35	2	2	3	35	1	2	2	2	2	3	1	502301	1	35	0	2	1	2	4	1	5023	502301	50230101	12	1	1	99.5359	1	17	578.486	589.854	648.42	598.26	598.502	650.19	579.715	614.204	590.81
792	35	1	4	50230122			0	2	1	35	35	2	3	2	35	5	5	1	1	2	1	1	502301	1	35	0	2	1	2	4	1	5023	502301	50230101	4	1	1	99.5359	1	17	474.561	448.174	520.025	505.828	476.399	548.591	513.976	495.798	527.278
792	35	4	1	50240201			0	2	1	35	35	2	1	2				9					502401	1	35	0	3	1	2	4	1	5024	502402	50240101	5	1	1	370.799	1	16	606.751	564.788	554.822	546.68	592.412	584.174	545.77	604.001	546.145
792	35	4	1	50240202			0	2	1	35	35	2	1	1				9					502401	1	35	0	3	1	2	4	1	5024	502402	50240101	6	1	1	370.799	1	16	431.449	420.684	454.162	418.166	451.834	479.941	408.813	431.555	407.995
792	35	4	1	50240203			1	1	1	35	35	1	2	2				9					502401	1	35	0	3	1	2	4	1	5024	502402	50240101	10	1	1	370.799	1	16	540.262	521.85	486.315	495.19	530.973	543.77	450.432	477.891	481.007
792	35	4	1	50240204			0	1	1	35	35	1	1	2	35	1	3	2	3	2	3	4	502401	1	35	0	3	1	2	4	1	5024	502402	50240101	7	1	1	370.799	1	16	448.696	422.15	407.783	457.162	454.209	420.325	423.41	460.278	467.137
792	35	4	1	50240205			0	1	1	35	35	1	1	2	35	9	9	9	9	9	9	9	502401	1	35	0	3	1	2	4	1	5024	502402	50240101	8	1	1	370.799	1	16	464.86	469.604	508.778	483.982	492.605	484.809	474.451	483.321	479.778
792	35	4	1	50240206			0	1	1	35	35	1	1	2	35			9					502401	1	35	0	3	1	2	4	1	5024	502402	50240101	11	1	1	370.799	1	16	514.236	501.642	471.145	518.289	548.081	487.008	497.333	509.583	509.408
792	35	4	1	50240207			0	2	1	35	35	2	1	3				9					502401	1	35	0	3	1	2	4	1	5024	502402	50240101	12	1	1	370.799	1	16	354.556	394.506	364.549	344.19	393.323	284.711	319.807	370.292	305.303
792	35	4	1	50240208			1	1	1	35	35	1	1	2	35	3	3	2	2	1	3	4	502401	1	35	0	3	1	2	4	1	5024	502402	50240101	9	1	1	370.799	1	16	582.649	575.432	569.273	560.336	560.052	572.658	602.847	562.606	550.174
792	35	4	1	50240210			0	2	1	35	35	2	1	2	35	9	9	9	9	9	9	4	502401	1	35	0	3	1	2	4	1	5024	502402	50240101	13	1	1	370.799	1	16	627.483	568.84	569.491	581.558	553.276	593.107	574.176	578.832	553.028
792	35	4	1	50240211			0	2	1	35	35	2	1	3	35	4	3	2	2	1	1	3	502401	1	35	0	3	1	2	4	1	5024	502402	50240101	2	1	1	370.799	1	16	617.46	597.05	587.342	566.369	563.871	610.66	577.09	601.463	546.055
792	35	4	1	50240212			0	1	1	35	35	1	1	2				9					502401	1	35	0	3	1	2	4	1	5024	502402	50240101	14	1	1	370.799	1	16	498.734	505.719	491.115	467.503	464.791	432.938	469.935	503.762	477.85
792	35	4	1	50240213			0	2	1	35	35	2	2	2	35	1	2	2	3	2	3	4	502401	1	35	0	3	1	2	4	1	5024	502402	50240101	3	1	1	370.799	1	16	549.77	519.895	528.684	516.531	574.863	572.436	613.823	560.913	608.303
792	35	4	1	50240214			1	2	1	35	35	2	1	2				9					502401	1	35	0	3	1	2	4	1	5024	502402	50240101	4	1	1	370.799	1	16	384.95	389.025	356.237	430.402	359.949	401.726	360.624	450.253	414.32
792	35	4	1	50240215			1	2	1	35	35	2	1	3	35	9	9	9	9	9	9	9	502401	1	35	0	3	1	2	4	1	5024	502402	50240101	15	1	1	370.799	1	16	494.533	544.081	518.019	499.224	490.834	519.308	534.088	529.288	525.899
792	35	4	1	50240217			0	2	1	35	35	2	1	3	35			9					502401	1	35	0	3	1	2	4	1	5024	502402	50240101	16	1	1	370.799	1	16	429.588	446.382	415.008	449.854	441.043	461.006	477.716	483.747	448.804
792	35	4	1	50240219			1	1	1	35	35	1	1	2				9					502401	1	35	0	3	1	2	4	1	5024	502402	50240101	17	1	1	370.799	1	16	522.643	514.607	487.653	524.857	552.393	582.314	499.891	523.084	532.532
792	35	4	1	50240221			0	1	1	35	35	1	1	3				9					502401	1	35	0	3	1	2	4	1	5024	502402	50240101	18	1	1	370.799	1	16	436.194	439.865	444.008	454.015	394.808	485.093	442.198	469.396	462.452
792	35	4	1	50240226			1	1	1	35	35	1	1	3				9					502401	1	35	0	3	1	2	4	1	5024	502402	50240101	8	1	1	370.799	1	16	583.078	602.873	581.606	563.628	550.666	542.356	574.283	542.334	551.536
792	35	4	1	50240228			0	2	1	35	35	2	2	2	35	4	3	2	2	2	2	4	502401	1	35	0	3	1	2	4	1	5024	502402	50240101	1	1	1	370.799	1	16	574.771	525.718	603.06	574.093	558.975	545.846	561.801	546.938	550.575
792	35	4	1	50240229			0	1	1	35	35	1	1	2	35			9					502401	1	35	0	3	1	2	4	1	5024	502402	50240101	14	1	1	370.799	1	16	402.611	368.616	378.435	305.709	374.274	300.245	348.044	372.812	387.636
792	35	4	1	50240230			0	2	1	35	35	2	2	2	35	2	2	2	3	2	4	7	502401	1	35	0	3	1	2	4	1	5024	502402	50240101	15	1	1	370.799	1	16	560.346	555.083	628.576	612.332	572.79	555.993	559.094	552.169	558.687
792	35	9	9	50250201			0	2	1	35	35	2	1	2	35	2	2	2	2	2	1	3	502501	1	35	0	2	1	2	4	1	5025	502502	50250101	7	1	1	192.727	0	6	615.996	596.31	614.829	604.552	625.758	630.842	593.468	572.646	678.741
792	35	9	9	50250202			0	2	1	35	35	2	2	1	35	3	4	2	2	2	1	3	502501	1	35	0	2	1	2	4	1	5025	502502	50250101	8	1	1	192.727	0	6	556.738	492.805	510.774	525.771	522.278	517.313	507.671	508.417	523.847
792	35	9	9	50250203			0	2	1	35	35	2	1	2	35	4	4	2	1	2	1	3	502501	1	35	0	2	1	2	4	1	5025	502502	50250101	11	1	1	192.727	0	6	564.35	627.613	596.739	610.04	592.32	583.541	604.086	595.985	613.67
792	35	9	9	50250204			1	1	1	35	35	1	1	2	35	3	4	2	1	1	1	1	502501	1	35	0	2	1	2	4	1	5025	502502	50250101	12	1	1	192.727	0	6	511.876	526.211	525.373	506.973	592.047	582.457	550.652	581.048	571.546
792	35	9	9	50250205			1	2	1	35	35	2	1	3	35	5	5	1	1	3	1	1	502501	1	35	0	2	1	2	4	1	5025	502502	50250101	13	1	1	192.727	0	6	662.211	653.233	664.424	635.801	603.759	595.337	625.679	584.307	687.653
792	35	9	9	50250206			0	1	1	35	35	1	1	3	35	3	3	2	2	2	1	3	502501	1	35	0	2	1	2	4	1	5025	502502	50250101	14	1	1	192.727	0	6	551.77	537.007	579.182	565.672	594.935	602.424	579.887	567.716	603.231
792	35	9	9	50250207			0	2	1	35	35	2	2	2	35	4	4	2	1	2	1	1	502501	1	35	0	2	1	2	4	1	5025	502502	50250101	15	1	1	192.727	0	6	650.263	597.848	611.43	603.907	660.005	654.985	744.968	564.579	559.906
792	35	9	9	50250208			1	2	1	35	35	2	2	3	35	2	2	2	2	2	3	2	502501	1	35	0	2	1	2	4	1	5025	502502	50250101	9	1	1	192.727	0	6	517.403	475.636	476.106	460.272	470.862	498.78	502.081	451.148	471.066
792	35	9	9	50250209			1	2	1	35	35	2	1	3	35	3	4	2	2	1	2	3	502501	1	35	0	2	1	2	4	1	5025	502502	50250101	1	1	1	192.727	0	6	516.918	552.487	555.944	530.911	573.355	594.013	529.129	493.004	546.533
792	35	9	9	50250210			0	1	1	35	35	1	1	3	35	3	4	1	2	3	1	3	502501	1	35	0	2	1	2	4	1	5025	502502	50250101	2	1	1	192.727	0	6	556.738	559.391	564.981	531.051	550.214	517.553	562.599	561.827	591.837
792	35	9	9	50250211			0	2	1	35	35	2	2	3	35	3	2	2	2	1	1	3	502501	1	35	0	2	1	2	4	1	5025	502502	50250101	16	1	1	192.727	0	6	380.015	407.178	399.867	407.786	376.49	403.669	446.131	353.541	380.302
792	35	9	9	50250212			1	1	1	35	35	1	1	3	35	2	2	2	2	9	1	3	502501	1	35	0	2	1	2	4	1	5025	502502	50250101	17	1	1	192.727	0	6	638.516	634.012	599.337	612.235	641.943	591.303	625.592	609.884	584.015
792	35	9	9	50250213			1	1	1	35	35	1	1	2	35	5	5	1	1	2	1	3	502501	1	35	0	2	1	2	4	1	5025	502502	50250101	3	1	1	192.727	0	6	609.768	622.833	553.39	552.029	579.069	588.056	577.197	651.974	630.577
792	35	9	9	50250214			0	1	1	35	35	1	1	9	35	2	2	2	2	2	3	1	502501	1	35	0	2	1	2	4	1	5025	502502	50250101	18	1	1	192.727	0	6	569.636	519.292	505.704	551.311	597.01	582.822	521.114	540.497	591.72
792	35	9	9	50250215			0	1	1	35	35	1	2	2	35	3	2	2	2	1	4	2	502501	1	35	0	2	1	2	4	1	5025	502502	50250101	10	1	1	192.727	0	6	499.934	506.207	498.923	537.079	505.406	500.854	531.412	490.877	479.699
792	35	9	9	50250216			0	2	1	35	35	2	1	1	35	3	3	2	1	1	1	1	502501	1	35	0	2	1	2	4	1	5025	502502	50250101	4	1	1	192.727	0	6	563.778	575.994	586.619	549.552	558.516	555.988	550.88	526.364	583.513
792	35	9	9	50250217			0	2	1	35	35	2	2	3	35	3	4	1	1	2	1	1	502501	1	35	0	2	1	2	4	1	5025	502502	50250101	15	1	1	192.727	0	6	637.374	650.878	526.834	659.59	594.929	732.899	640.999	578.571	661.689
792	35	9	9	50250218			1	1	1	35	35	1	1	2	35	4	2	2	2	1	3	4	502501	1	35	0	2	1	2	4	1	5025	502502	50250101	5	1	1	192.727	0	6	605.39	613.796	642.529	575.552	624.59	625.53	586.657	600.801	614.807
792	35	9	9	50250219			0	2	1	35	35	2	1	9	35	2	2	2	2	2	1	3	502501	1	35	0	2	1	2	4	1	5025	502502	50250101	11	1	1	192.727	0	6	556.088	551.93	583.176	537.343	522.529	498.069	572.415	601.331	571.554
792	35	9	9	50250220			0	2	1	35	35	2	1	3	35	5	5	1	1	1	1	1	502501	1	35	0	2	1	2	4	1	5025	502502	50250101	6	1	1	192.727	0	6	702.568	700.148	780.77	752.778	691.747	639.499	669.707	603.853	653.601
792	35	9	9	50250221			0	1	1	35	35	1	3	3	35	1	2	2	2	2	1	2	502501	1	35	0	2	1	2	4	1	5025	502502	50250101	12	1	1	192.727	0	6	516.012	520.128	498.147	522.068	598.5	510.981	530.754	463.589	486.464
792	35	9	9	50250222			0	2	1	35	35	2	1	2	35	4	9	2	2	1	3	2	502501	1	35	0	2	1	2	4	1	5025	502502	50250101	13	1	1	192.727	0	6	584.35	586.027	607.511	576.733	576.722	598.541	634.763	635.104	618.519
792	35	9	9	50250224			1	2	1	35	35	2	1	2	35	3	2	2	2	2	1	3	502501	1	35	0	2	1	2	4	1	5025	502502	50250101	7	1	1	192.727	0	6	541.304	553.747	566.032	501.692	515.119	504.734	472.815	544.829	515.931
792	35	9	9	50250225			0	2	1	35	35	2	2	2	35	2	3	2	2	2	1	3	502501	1	35	0	2	1	2	4	1	5025	502502	50250101	8	1	1	192.727	0	6	574.641	571.869	545.672	537.499	558.254	554.817	563.307	536.746	573.25
792	35	9	9	50250226			0	2	1	35	35	2	1	3	35	5	5	2	1	2	1	1	502501	1	35	0	2	1	2	4	1	5025	502502	50250101	14	1	1	192.727	0	6	466.837	466.028	464.486	450.794	464.357	466.071	451.326	447.551	449.854
792	35	9	9	50250227			0	1	1	35	35	1	1	2	35	5	5	1	1	1	1	1	502501	1	35	0	2	1	2	4	1	5025	502502	50250101	9	1	1	192.727	0	6	633.668	581.256	574.109	591.923	587.712	679.706	608.425	635.263	634.062
792	35	9	9	50250228			1	1	1	35	35	1	1	2	35	3	2	2	2	2	3	1	502501	1	35	0	2	1	2	4	1	5025	502502	50250101	15	1	1	192.727	0	6	462.75	500.803	488.989	516.427	530.145	520.009	506.716	528.676	526.255
792	35	9	9	50250229			0	1	1	35	35	1	1	3	35	5	5	1	1	9	1	9	502501	1	35	0	2	1	2	4	1	5025	502502	50250101	16	1	1	192.727	0	6	539.894	523.843	512.868	497.808	588.219	480.602	549.737	527.244	541.205
792	35	9	9	50250230			0	1	1	35	35	1	1	2	35	3	2	2	3	2	5	3	502501	1	35	0	2	1	2	4	1	5025	502502	50250101	1	1	1	192.727	0	6	535.639	493.714	476.124	476.8	495.785	459.056	519.822	438.383	522.352
792	35	9	9	50250232			0	2	1	35	35	2	1	3	35	9	9	2	2	1	2	4	502501	1	35	0	2	1	2	4	1	5025	502502	50250101	3	1	1	192.727	0	6	483.81	537.845	485.226	460.883	515.591	490.806	457.611	489.493	435.182
792	35	9	9	50250233			0	2	1	35	35	2	1	2	35	2	1	3	3	2	4	4	502501	1	35	0	2	1	2	4	1	5025	502502	50250101	4	1	1	192.727	0	6	510.023	487.797	534.288	560.048	499.725	508.214	498.567	575.891	498.791
792	35	9	9	50250234			0	2	1	35	35	2	1	2	35	4	5	9	1	9	9	9	502501	1	35	0	2	1	2	4	1	5025	502502	50250101	5	1	1	192.727	0	6	500.139	522.796	492.699	531.607	473.541	560.191	531.024	525.712	492.861
792	35	9	9	50250235			0	2	1	35	35	2	1	3	35	3	4	2	2	2	1	3	502501	1	35	0	2	1	2	4	1	5025	502502	50250101	17	1	1	192.727	0	6	472.797	572.979	503.016	535.449	503.496	516.317	472.26	518.956	560.304
792	35	4	1	50260301			0	2	1	35	35	2	2	3	35	2	4	2	2	1	2	4	502601	1	35	0	2	1	2	4	1	5026	502603	50260101	12	1	1	233.681	0	67	521.004	541.62	534.317	535.234	554.386	531.233	564.024	531.103	535.732
792	35	4	1	50260302			1	2	1	35	35	2	1	1	35	2	3	3	3	2	5	5	502601	1	35	0	2	1	2	4	1	5026	502603	50260101	13	1	1	233.681	0	67	338.671	351.447	340.157	386.233	311.854	342.084	335.345	360.844	326.825
792	35	4	1	50260303			1	2	1	35	35	2	2	3	35	1	1	3	3	3	5	6	502601	1	35	0	2	1	2	4	1	5026	502603	50260101	14	1	1	233.681	0	67	566.254	489.784	538.751	519.632	508.766	527.562	492.091	478.419	551.578
792	35	4	1	50260304			0	1	1	35	35	1	1	3	35	5	5	2	2	3	4	5	502601	1	35	0	2	1	2	4	1	5026	502603	50260101	5	1	1	233.681	0	67	582.918	514.042	526.881	543.141	517.562	542.512	553.163	546.565	530.781
792	35	4	1	50260305			0	1	1	35	35	1	2	9	35	3	3	2	2	2	4	3	502601	1	35	0	2	1	2	4	1	5026	502603	50260101	15	1	1	233.681	0	67	431.311	463.201	454.012	488.208	428.959	409.084	421.256	425.053	405.918
792	35	4	1	50260306			1	2	1	35	35	2	2	3	35	4	4	2	1	1	1	3	502601	1	35	0	2	1	2	4	1	5026	502603	50260101	6	1	1	233.681	0	67	650.515	613.694	637.448	650.786	586.34	667.036	661.556	581.493	635.467
792	35	4	1	50260307			0	2	1	35	35	2	1	1	35			9					502601	1	35	0	2	1	2	4	1	5026	502603	50260101	7	1	1	233.681	0	67	333.861	430.98	402.18	435.901	394.657	383.396	436.434	410.126	385.643
792	35	4	1	50260309			0	1	1	35	35	1	1	2	35	1	3	2	3	2	5	6	502601	1	35	0	2	1	2	4	1	5026	502603	50260101	16	1	1	233.681	0	67	447.201	469.917	458.522	476.421	466.113	488.388	493.779	475.901	448.25
792	35	4	1	50260311			1	1	1	35	35	1	2	2	35	1	3	2	2	2	3	9	502601	1	35	0	2	1	2	4	1	5026	502603	50260101	9	1	1	233.681	0	67	562.268	535.249	530.238	559.782	520.522	595.253	523.569	579.222	614.22
792	35	4	1	50260312			0	2	1	35	35	2	1	3	35	1	2	2	3	3	5	5	502601	1	35	0	2	1	2	4	1	5026	502603	50260101	18	1	1	233.681	0	67	628.63	625.182	607.535	624.551	532.917	583.305	555.883	499.895	622.519
792	35	4	1	50260313			0	2	1	35	35	2	2	2	35	3	2	2	2	2	3	3	502601	1	35	0	2	1	2	4	1	5026	502603	50260101	1	1	1	233.681	0	67	550.551	569.394	594.822	575.757	588.639	663.766	601.763	580.951	642.222
792	35	4	1	50260314			0	2	1	35	35	2	2	2	35	3	4	2	2	2	1	3	502601	1	35	0	2	1	2	4	1	5026	502603	50260101	2	1	1	233.681	0	67	523.538	526.423	467.223	531.032	496.955	559.712	559.089	524.715	489.43
792	35	4	1	50260315			0	1	1	35	35	1	1	2	35	2	2	2	2	1	3	3	502601	1	35	0	2	1	2	4	1	5026	502603	50260101	10	1	1	233.681	0	67	471.964	507.492	526.052	493.875	435.552	481.503	520.731	474.956	551.661
792	35	4	1	50260317			1	1	1	35	35	1	1	3	35	2	2	2	3	1	5	5	502601	1	35	0	2	1	2	4	1	5026	502603	50260101	11	1	1	233.681	0	67	418.899	444.613	445.302	441.566	438.643	477.099	472.921	366.614	473.527
792	35	4	1	50260318			0	2	1	35	35	2	2	3	35	3	4	2	2	2	3	5	502601	1	35	0	2	1	2	4	1	5026	502603	50260101	3	1	1	233.681	0	67	594.444	550.564	565.985	550.442	567.737	536.254	540.285	539.837	542.683
792	35	4	1	50260319			0	2	1	35	35	2	3	2	35	2	2	2	2	3	1	3	502601	1	35	0	2	1	2	4	1	5026	502603	50260101	12	1	1	233.681	0	67	564.124	562.308	555.061	555.409	606.863	608.272	590.619	463.55	531.175
792	35	4	1	50260320			1	1	1	35	35	1	1	3	35	2	2	2	3	2	3	4	502601	1	35	0	2	1	2	4	1	5026	502603	50260101	4	1	1	233.681	0	67	621.634	621.76	685.862	614.032	655.185	623.42	635.308	652.969	637.949
792	35	4	1	50260321			0	1	1	35	35	1	2	3	35	4	3	2	2	2	3	1	502601	1	35	0	2	1	2	4	1	5026	502603	50260101	5	1	1	233.681	0	67	479.765	482.574	505.416	494.619	494.246	512.689	505.047	508.778	488.782
792	35	4	1	50260322			0	2	1	35	35	2	1	3	35	3	4	2	2	1	3	4	502601	1	35	0	2	1	2	4	1	5026	502603	50260101	6	1	1	233.681	0	67	634.949	681.056	648.041	659.99	686.856	646.914	650.297	698.934	731.639
792	35	4	1	50260323			0	1	1	35	35	1	1	3	35	2	4	2	2	2	2	1	502601	1	35	0	2	1	2	4	1	5026	502603	50260101	13	1	1	233.681	0	67	556.114	591.094	566.494	594.367	606.557	584.615	583.237	626.827	556.087
792	35	4	1	50260324			0	2	1	35	35	2	1	3	35	2	3	2	2	3	1	3	502601	1	35	0	2	1	2	4	1	5026	502603	50260101	7	1	1	233.681	0	67	500.278	503.872	503.273	508.3	486.816	519.456	505.736	495.059	544.261
792	35	4	1	50260325			0	2	1	35	35	2	1	1	35	3	5	2	2	2	2	3	502601	1	35	0	2	1	2	4	1	5026	502603	50260101	8	1	1	233.681	0	67	640.098	608.718	611.944	661.828	625.883	557.886	565.97	571.169	552.048
792	35	4	1	50260326			0	2	1	35	35	2	1	2	35	2	4	2	2	2	3	4	502601	1	35	0	2	1	2	4	1	5026	502603	50260101	14	1	1	233.681	0	67	568.764	523.763	520.839	496.56	531.192	546.306	518.873	535.836	508.893
792	35	4	1	50260327			0	2	1	35	35	2	1	1	35	2	2	2	3	2	3	6	502601	1	35	0	2	1	2	4	1	5026	502603	50260101	9	1	1	233.681	0	67	521.039	534.176	559.123	504.945	529.151	526.946	534.442	545.689	532.73
792	35	4	1	50260328			0	1	1	35	35	1	1	2	35	3	2	2	2	1	3	3	502601	1	35	0	2	1	2	4	1	5026	502603	50260101	15	1	1	233.681	0	67	506.673	639.663	552.898	568.265	565.632	590.593	524.513	597.195	582.713
792	35	4	1	50260329			1	2	1	35	35	2	1	3	35	3	3	2	2	1	3	4	502601	1	35	0	2	1	2	4	1	5026	502603	50260101	1	1	1	233.681	0	67	612.151	604.945	611.028	618.407	670.045	634.679	714.905	686.221	662.015
792	35	3	1	50270502			0	2	1	35	35	2	3	2	35	4	3	2	2	3	5	4	502701	1	35	0	2	1	2	4	1	5027	502705	50270101	14	1	1	273.076	0	34	387.814	299.353	295.943	345.734	344.923	300.731	369.354	328.916	277.109
792	35	3	1	50270503			1	1	1	35	35	1	1	3	35	3	3	2	2	2	3	4	502701	1	35	0	2	1	2	4	1	5027	502705	50270101	15	1	1	273.076	0	34	484.722	472.225	490.006	499.485	482.497	534.281	450.027	427.563	480.942
792	35	3	1	50270504			0	1	1	35	35	1	1	3	35	3	4	2	2	2	4	3	502701	1	35	0	2	1	2	4	1	5027	502705	50270101	16	1	1	273.076	0	34	442.737	389.423	413.933	401.414	376.055	405.107	407.311	417.703	429.209
792	35	3	1	50270505			0	2	1	35	35	2	1	3	35	2	2	2	3	2	4	4	502701	1	35	0	2	1	2	4	1	5027	502705	50270101	9	1	1	273.076	0	34	453.791	437.468	410.034	411.419	464.819	400.204	386.575	353.179	405.655
792	35	3	1	50270506			0	2	1	35	35	2	1	2	35	1	2	2	3	2	3	4	502701	1	35	0	2	1	2	4	1	5027	502705	50270101	1	1	1	273.076	0	34	508.127	546.657	490.696	509.837	484.997	597.017	531.859	547.097	540.106
792	35	3	1	50270511			1	1	1	35	35	1	1	3	35	2	2	2	3	2	4	5	502701	1	35	0	2	1	2	4	1	5027	502705	50270101	18	1	1	273.076	0	34	574.137	563.003	562.812	527.862	533.752	582.462	613.965	634.089	558.519
792	35	3	1	50270512			0	2	1	35	35	2	2	2	35	2	1	2	3	3	3	3	502701	1	35	0	2	1	2	4	1	5027	502705	50270101	4	1	1	273.076	0	34	429.64	370.733	377.568	443.691	361.148	444.033	437.436	367.754	388.281
792	35	3	1	50270513			0	2	1	35	35	2	1	2	35	2	2	2	3	2	4	3	502701	1	35	0	2	1	2	4	1	5027	502705	50270101	5	1	1	273.076	0	34	336.91	319.7	397.303	318.281	359.913	327.132	312.695	405.45	353.228
792	35	3	1	50270514			0	1	1	35	35	1	2	3	35	2	3	2	2	2	5	2	502701	1	35	0	2	1	2	4	1	5027	502705	50270101	6	1	1	273.076	0	34	453.912	473.466	501.608	444.532	466.212	510.085	449.811	481.34	475.986
792	35	3	1	50270515			0	2	1	35	35	2	2	2	35	2	2	3	3	2	5	4	502701	1	35	0	2	1	2	4	1	5027	502705	50270101	7	1	1	273.076	0	34	521.649	489.025	488.884	415.735	452.41	465.524	412.589	434.302	404.866
792	35	3	1	50270516			0	2	1	35	35	2	3	2	35	2	2	2	3	3	3	4	502701	1	35	0	2	1	2	4	1	5027	502705	50270101	10	1	1	273.076	0	34	403.656	401.21	429.1	418.968	384.613	402.07	348.171	362.127	373.012
792	35	3	1	50270517			0	1	1	35	35	1	1	3	35	2	3	2	2	2	5	2	502701	1	35	0	2	1	2	4	1	5027	502705	50270101	11	1	1	273.076	0	34	396.999	434.7	419.294	442.969	401.6	387.294	444.277	432.966	431.306
792	35	3	1	50270518			0	1	1	35	35	1	2	1	35	3	2	3	3	2	5	3	502701	1	35	0	2	1	2	4	1	5027	502705	50270101	8	1	1	273.076	0	34	403.179	432.573	353.161	438.59	369.186	331.335	387.366	341.985	321.344
792	35	3	1	50270519			1	1	1	35	35	1	1	2	35	2	2	3	3	3	5	4	502701	1	35	0	2	1	2	4	1	5027	502705	50270101	12	1	1	273.076	0	34	451.741	480.731	453.281	443.703	466.864	459.348	441.449	486.724	459.836
792	35	3	1	50270520			1	1	1	35	35	1	1	2	35	1	1	3	3	3	5	5	502701	1	35	0	2	1	2	4	1	5027	502705	50270101	13	1	1	273.076	0	34	502.819	451.689	472.43	461.904	471.871	468.906	465.654	471.086	494.108
792	35	3	1	50270522			0	2	1	35	35	2	2	3	35	3	3	2	3	1	5	5	502701	1	35	0	2	1	2	4	1	5027	502705	50270101	14	1	1	273.076	0	34	342.167	290.897	358.397	355.883	306.088	402.968	404.822	343.865	304.966
792	35	3	1	50270523			1	1	1	35	35	1	1	3	35	3	3	2	3	1	5	5	502701	1	35	0	2	1	2	4	1	5027	502705	50270101	1	1	1	273.076	0	34	458.87	513.101	511.508	467.927	473.605	503.491	475.857	498.183	503.575
792	35	3	1	50270524			0	2	1	35	35	2	2	9	35	1	1	3	3	3	5	3	502701	1	35	0	2	1	2	4	1	5027	502705	50270101	2	1	1	273.076	0	34	364.497	341.459	325.612	385.949	389.639	345.232	345.081	358.5	426.551
792	35	3	1	50270527			1	1	1	35	35	1	2	3				9					502701	1	35	0	2	1	2	4	1	5027	502705	50270101	4	1	1	273.076	0	34	553.673	546.915	555.861	467.954	577.676	514.387	521.888	544.277	594.799
792	35	3	1	50270528			0	1	1	35	35	1	1	2	35	1	2	3	3	3	4	4	502701	1	35	0	2	1	2	4	1	5027	502705	50270101	5	1	1	273.076	0	34	509.221	549.189	524.795	509.691	516.185	514.617	512.556	483.101	538.63
792	35	3	1	50270529			1	1	1	35	35	1	2	2	35	2	2	2	3	2	5	6	502701	1	35	0	2	1	2	4	1	5027	502705	50270101	16	1	1	273.076	0	34	394.659	374.15	424.838	399.363	363.908	362.466	452.697	401.136	407.128
792	35	3	1	50270530			0	2	1	35	35	2	2	3	35	1	1	3	3	3	5	4	502701	1	35	0	2	1	2	4	1	5027	502705	50270101	17	1	1	273.076	0	34	476.882	479.426	499.49	486.798	467.948	421.963	453.475	476.669	440.561
792	35	3	1	50270531			0	1	1	35	35	1	2	2	35	2	2	3	3	2	5	4	502701	1	35	0	2	1	2	4	1	5027	502705	50270101	18	1	1	273.076	0	34	338.859	322.699	335.222	363.735	312.659	312.753	360.391	359.361	353.942
792	35	3	1	50270533			0	2	1	35	35	2	2	1	35	3	3	2	2	2	5	3	502701	1	35	0	2	1	2	4	1	5027	502705	50270101	7	1	1	273.076	0	34	286.478	282.546	322.152	289.137	275.818	345.367	313.374	303.359	341.385
792	35	3	1	50270534			1	1	1	35	35	1	2	9	35	1	1	3	3	2	5	5	502701	1	35	0	2	1	2	4	1	5027	502705	50270101	8	1	1	273.076	0	34	307.344	315.328	313.131	347.951	304.443	306.483	335.483	328.302	392.787
792	35	3	1	50270535			1	1	1	35	35	1	1	1				9					502701	1	35	0	2	1	2	4	1	5027	502705	50270101	10	1	1	273.076	0	34	443.749	459.17	469.071	460.405	468.324	457.037	468.254	474.115	463.477
792	35	3	1	50270536			0	1	1	35	35	1	1	3	35	2	2	2	2	2	1	3	502701	1	35	0	2	1	2	4	1	5027	502705	50270101	11	1	1	273.076	0	34	355.571	395.095	311.676	294.466	355.468	380.967	364.419	423.378	360.026
792	35	4	1	50280101			0	1	1	35	35	1	1	2	35	1	2	2	3	3	4	5	502801	1	35	0	3	1	2	4	1	5028	502801	50280101	2	1	1	349.297	0	53	471.549	477.71	474.73	435.642	506.051	493.368	510.667	506.214	527.945
792	35	4	1	50280103			1	1	1	35	35	1	2	3	35	1	2	2	3	3	5	4	502801	1	35	0	3	1	2	4	1	5028	502801	50280101	3	1	1	349.297	0	53	457.232	480.61	472.434	455.825	469.428	449.831	473.258	444.616	442.446
792	35	4	1	50280104			0	2	1	35	35	2	1	3	35	1	1	3	3	3	4	5	502801	1	35	0	3	1	2	4	1	5028	502801	50280101	4	1	1	349.297	0	53	407.762	429.135	443.678	395.616	427.615	447.877	377.546	418.283	416.365
792	35	4	1	50280105			0	1	1	35	35	1	1	3	35	1	2	2	3	3	4	4	502801	1	35	0	3	1	2	4	1	5028	502801	50280101	5	1	1	349.297	0	53	479.011	459.434	412.569	444.628	473.899	431.12	416.284	450.199	437.251
792	35	4	1	50280106			0	2	1	35	35	2	2	2	35	1	2	2	3	3	4	4	502801	1	35	0	3	1	2	4	1	5028	502801	50280101	15	1	1	349.297	0	53	476.838	455.94	460.911	454.788	484.855	513.204	437.316	452.269	420.039
792	35	4	1	50280107			0	1	1	35	35	1	1	3	35	1	1	2	3	3	3	6	502801	1	35	0	3	1	2	4	1	5028	502801	50280101	16	1	1	349.297	0	53	426.106	482.563	437.215	478.219	441.186	493.316	400.823	437.158	481.697
792	35	4	1	50280108			0	1	1	35	35	1	1	3	35	3	4	2	2	2	3	3	502801	1	35	0	3	1	2	4	1	5028	502801	50280101	17	1	1	349.297	0	53	446.477	444.021	477.125	464.713	479.17	503.287	445.567	492.453	442.241
792	35	4	1	50280109			1	1	1	35	35	1	1	3	35	4	5	1	1	1	1	3	502801	1	35	0	3	1	2	4	1	5028	502801	50280101	18	1	1	349.297	0	53	557.068	572.535	566.776	618.481	679.622	589.773	579.473	603.304	579.502
792	35	4	1	50280110			1	2	1	35	35	2	2	3	35	2	2	2	3	3	4	5	502801	1	35	0	3	1	2	4	1	5028	502801	50280101	6	1	1	349.297	0	53	547.14	521.771	574.406	544.854	527.072	516.468	517.543	520.809	517.318
792	35	4	1	50280113			0	2	1	35	35	2	2	3	35	1	2	2	3	3	3	3	502801	1	35	0	3	1	2	4	1	5028	502801	50280101	8	1	1	349.297	0	53	555.736	529.805	593.718	553.057	520.979	590.377	543.268	560.607	506.578
792	35	4	1	50280115			1	2	1	35	35	2	1	2	35	1	1	2	3	3	3	3	502801	1	35	0	3	1	2	4	1	5028	502801	50280101	12	1	1	349.297	0	53	337.95	305.27	329.467	355.158	299.125	305.527	331.118	327.496	360.74
792	35	4	1	50290101			0	1	1	35	35	1	1	3	35	3	5	1	1	1	1	3	502901	1	35	0	3	1	2	4	1	5029	502901	50290101	11	1	1	256.747	0	3	628.895	591.996	620.547	579.516	573.037	600.352	608.67	567.127	580.006
792	35	4	1	50290102			0	2	1	35	35	2	1	1	35	1	3	2	2	1	2	5	502901	1	35	0	3	1	2	4	1	5029	502901	50290101	7	1	1	256.747	0	3	545.944	584.166	574.665	587.573	520.708	550.376	518.168	543.612	536.41
792	35	4	1	50290103			0	1	1	35	35	1	1	2	35	5	4	2	2	1	3	5	502901	1	35	0	3	1	2	4	1	5029	502901	50290101	12	1	1	256.747	0	3	571.368	528.48	577.119	524.025	578.835	480.855	490.086	503.033	520.957
792	35	4	1	50290104			0	2	1	35	35	2	2	2	35	5	4	2	2	2	2	4	502901	1	35	0	3	1	2	4	1	5029	502901	50290101	13	1	1	256.747	0	3	594.976	613.273	614.368	600.349	597.864	603.321	553.662	590.339	625.927
792	35	4	1	50290105			1	2	1	35	35	2	2	9	35	1	1	3	3	2	5	7	502901	1	35	0	3	1	2	4	1	5029	502901	50290101	14	1	1	256.747	0	3	662.094	622.544	644.396	618.596	641.454	663.726	589.324	603.972	586.358
792	35	4	1	50290106			0	1	1	35	35	1	1	1	35	2	2	2	2	2	3	3	502901	1	35	0	3	1	2	4	1	5029	502901	50290101	8	1	1	256.747	0	3	550.259	533.219	512.506	570.114	490.168	550.66	546.316	538.748	529.775
792	35	4	1	50290107			0	2	1	35	35	2	1	2	35	3	3	2	3	1	5	5	502901	1	35	0	3	1	2	4	1	5029	502901	50290101	9	1	1	256.747	0	3	505.672	543.678	493.563	476.015	507.68	488.119	490.17	492.712	502.97
792	35	4	1	50290108			1	2	1	35	35	2	1	3	35	3	3	2	2	1	3	3	502901	1	35	0	3	1	2	4	1	5029	502901	50290101	1	1	1	256.747	0	3	554.717	538.305	509.029	508.416	505.823	488.068	508.154	548.005	492.545
792	35	4	1	50290110			1	2	1	35	35	2	2	1	35	1	1	3	3	2	5	6	502901	1	35	0	3	1	2	4	1	5029	502901	50290101	3	1	1	256.747	0	3	462.745	454.363	435.634	404.062	459.104	514.309	443.386	393.35	457.924
792	35	4	1	50290111			0	1	1	35	35	1	1	2	35	2	3	2	3	2	5	4	502901	1	35	0	3	1	2	4	1	5029	502901	50290101	4	1	1	256.747	0	3	514.792	488.648	512.408	457.776	488.063	464.976	436.123	485.642	463.299
792	35	4	1	50290112			0	1	1	35	35	1	2	2	35	3	3	2	3	2	5	5	502901	1	35	0	3	1	2	4	1	5029	502901	50290101	15	1	1	256.747	0	3	552.942	465.668	571.298	514.681	536.989	643.473	549.091	535.646	575.388
792	35	4	1	50290113			0	2	1	35	35	2	2	2	35	2	2	2	2	1	4	1	502901	1	35	0	3	1	2	4	1	5029	502901	50290101	16	1	1	256.747	0	3	421.625	386.52	405.695	407.871	403.357	441.013	416.376	409.085	384.895
792	35	4	1	50290114			0	2	1	35	35	2	1	2	35	2	2	3	3	2	5	5	502901	1	35	0	3	1	2	4	1	5029	502901	50290101	10	1	1	256.747	0	3	456.295	474.116	400.002	471.519	440.533	441.497	481.279	388.318	458.651
792	35	4	1	50290115			1	1	1	35	35	1	1	3	35	2	2	2	3	3	5	2	502901	1	35	0	3	1	2	4	1	5029	502901	50290101	17	1	1	256.747	0	3	393.062	474.237	442.827	430.911	416.965	386.62	420.308	418.662	360.735
792	35	4	1	50290116			0	2	1	35	35	2	2	2	35	2	3	2	3	2	4	5	502901	1	35	0	3	1	2	4	1	5029	502901	50290101	5	1	1	256.747	0	3	419.202	341.025	395.038	381.368	412.56	329.912	385.529	368.034	360.908
792	35	4	1	50290117			1	2	1	35	35	2	2	2	35	2	2	3	3	2	5	5	502901	1	35	0	3	1	2	4	1	5029	502901	50290101	6	1	1	256.747	0	3	440.559	461.414	436.615	404.493	460.026	460.679	446.503	480.082	522.979
792	35	4	1	50290118			0	1	1	35	35	1	2	2	35	2	3	2	3	2	4	5	502901	1	35	0	3	1	2	4	1	5029	502901	50290101	7	1	1	256.747	0	3	454.788	450.549	408.572	402.193	439.766	404.519	382.813	464.519	399.481
792	35	4	1	50290122			0	1	1	35	35	1	1	1	35	1	1	3	3	3	5	2	502901	1	35	0	3	1	2	4	1	5029	502901	50290101	11	1	1	256.747	0	3	355.926	396.148	350.962	403.128	386.306	342.822	346.948	323.138	379.072
792	35	4	1	50300101			1	2	1	35	35	2	3	1	35	1	1	3	3	2	5	5	503001	1	35	0	3	1	2	4	1	5030	503001	50300101	14	1	1	616.558	1	12	316.014	313.319	303.26	350.959	311.666	355.641	411.77	320.091	299.009
792	35	4	1	50300102			0	2	1	35	35	2	1	1	35	2	2	3	3	2	5	4	503001	1	35	0	3	1	2	4	1	5030	503001	50300101	15	1	1	616.558	1	12	521.338	485.568	477.172	541.945	498.639	465.36	498.076	477.077	544.802
792	35	4	1	50300104			0	1	1	35	35	1	1	2	35	2	3	2	2	1	3	4	503001	1	35	0	3	1	2	4	1	5030	503001	50300101	3	1	1	616.558	1	12	427.304	426.1	360.251	379.167	402.215	349.539	385.067	319.368	406.903
792	35	4	1	50300106			0	2	1	35	35	2	1	1	35	1	1	3	3	1	5	4	503001	1	35	0	3	1	2	4	1	5030	503001	50300101	5	1	1	616.558	1	12	456.055	460.776	425.898	466.537	419.592	428.952	446.451	372.434	438.335
792	35	4	1	50300108			0	2	1	35	35	2	1	1	35	1	1	3	3	3	5	4	503001	1	35	0	3	1	2	4	1	5030	503001	50300101	7	1	1	616.558	1	12	464.872	391.005	432.5	420.475	358.206	368.114	454.696	409.072	365.336
792	35	4	1	50300109			0	1	1	35	35	1	1	2	35	1	1	3	3	2	5	4	503001	1	35	0	3	1	2	4	1	5030	503001	50300101	17	1	1	616.558	1	12	505.906	485.089	506.368	484.935	498.771	542.537	494.052	515.033	566.124
792	35	4	1	50300113			1	1	1	35	35	1	1	1	35	1	1	3	3	2	5	4	503001	1	35	0	3	1	2	4	1	5030	503001	50300101	9	1	1	616.558	1	12	523.709	545.903	512.942	525.195	521.746	516.81	532.441	535.8	534.947
792	35	4	1	50300114			0	1	1	35	35	1	1	1	35	1	1	3	3	2	5	4	503001	1	35	0	3	1	2	4	1	5030	503001	50300101	1	1	1	616.558	1	12	338.262	367.667	441.413	365.231	375.597	406.245	418.221	328.497	384.482
792	35	4	1	50300115			1	1	1	35	35	1	2	1	35	1	1	3	3	2	5	4	503001	1	35	0	3	1	2	4	1	5030	503001	50300101	11	1	1	616.558	1	12	316.906	232.642	272.975	363.842	267.356	297.047	318.083	262.14	325.613
792	35	4	1	50300116			1	1	1	35	35	1	1	1	35	1	1	3	3	2	5	4	503001	1	35	0	3	1	2	4	1	5030	503001	50300101	2	1	1	616.558	1	12	331.428	297.504	368.567	437.635	351.632	367.858	299.584	333.338	323.86
792	35	4	1	50300117			0	2	1	35	35	2	1	2	35	1	1	3	3	2	5	4	503001	1	35	0	3	1	2	4	1	5030	503001	50300101	12	1	1	616.558	1	12	272.617	221.904	238.967	267.39	253.614	270.067	221.129	215.152	280.106
792	35	4	1	50300119			0	1	1	35	35	1	1	1	35	1	1	3	3	2	5	4	503001	1	35	0	3	1	2	4	1	5030	503001	50300101	3	1	1	616.558	1	12	438.918	467.027	426.94	459.278	431.351	448.977	424.014	424.989	433.967
792	35	4	1	50300120			0	1	1	35	35	1	2	3	35	1	2	2	3	2	4	4	503001	1	35	0	3	1	2	4	1	5030	503001	50300101	14	1	1	616.558	1	12	350.687	287.054	342.392	307.042	351.122	303.47	287.283	301.992	367.241
792	35	4	1	50300121			1	2	1	35	35	2	1	1	35	1	1	3	3	2	5	4	503001	1	35	0	3	1	2	4	1	5030	503001	50300101	4	1	1	616.558	1	12	397.938	366.438	395.266	450.466	383.625	368.395	367.488	337.866	415.432
792	35	3	3	50310101			0	1	1	35	35	1	1	3	35	3	3	2	2	1	3	2	503101	1	35	0	3	1	2	4	1	5031	503101	50310101	6	1	1	127.131	0	93	455.347	456.851	442.997	478.14	483.365	470.794	508.833	466.661	449.779
792	35	3	3	50310102			0	1	1	35	35	1	2	3	35	2	4	2	2	2	3	9	503101	1	35	0	3	1	2	4	1	5031	503101	50310101	7	1	1	127.131	0	93	643.421	651.055	704.548	641.028	715.182	666.476	701.537	653.39	722.368
792	35	3	3	50310103			0	1	1	35	35	1	1	3	35	2	4	2	2	1	3	4	503101	1	35	0	3	1	2	4	1	5031	503101	50310101	11	1	1	127.131	0	93	536.163	615.793	550.996	576.224	580.014	557.784	591.3	598.809	549.935
792	35	3	3	50310104			0	2	1	35	35	2	1	3	35	9	3	2	2	9	3	6	503101	1	35	0	3	1	2	4	1	5031	503101	50310101	12	1	1	127.131	0	93	486.502	475.667	478.998	473.1	498.078	545.938	502.532	479.751	540.527
792	35	3	3	50310105			1	2	1	35	35	2	1	2	35	2	1	3	3	2	5	4	503101	1	35	0	3	1	2	4	1	5031	503101	50310101	8	1	1	127.131	0	93	521.937	503.149	480.848	453.751	460.87	489.977	525.862	514.156	516.233
792	35	3	3	50310106			0	2	1	35	35	2	1	3	35	3	1	3	3	2	5	4	503101	1	35	0	3	1	2	4	1	5031	503101	50310101	13	1	1	127.131	0	93	523.075	546.283	524.234	590.963	567.938	548.365	516.494	515.453	512.198
792	35	3	3	50310107			0	2	1	35	35	2	3	2	35	3	3	2	2	2	1	5	503101	1	35	0	3	1	2	4	1	5031	503101	50310101	14	1	1	127.131	0	93	669.331	638.186	632.17	566.056	651.985	647.751	624.712	667.364	614.709
792	35	3	3	50310108			1	2	1	35	35	2	1	2	35	2	3	2	2	2	3	3	503101	1	35	0	3	1	2	4	1	5031	503101	50310101	9	1	1	127.131	0	93	513.176	503.755	521.743	509.464	526.14	511.078	518.858	497.296	550.255
792	35	3	3	50310109			0	1	1	35	35	1	1	2	35	3	2	2	3	2	5	5	503101	1	35	0	3	1	2	4	1	5031	503101	50310101	1	1	1	127.131	0	93	357.211	395.549	345.683	398.672	377.65	384.027	357.886	437.1	423.642
792	35	3	3	50310110			0	2	1	35	35	2	1	3	35	3	4	2	2	2	3	3	503101	1	35	0	3	1	2	4	1	5031	503101	50310101	15	1	1	127.131	0	93	516.626	521.187	518.577	470.14	519.384	470.33	473.56	451.839	543.817
792	35	3	3	50310111			0	1	1	35	35	1	1	3	35	3	3	2	2	1	3	4	503101	1	35	0	3	1	2	4	1	5031	503101	50310101	2	1	1	127.131	0	93	526.95	501.13	526.074	549.611	516.141	531.401	481.709	493.404	537.736
792	35	3	3	50310112			0	1	1	35	35	1	2	3	35	2	3	2	2	2	4	3	503101	1	35	0	3	1	2	4	1	5031	503101	50310101	16	1	1	127.131	0	93	473.826	494.387	434.837	453.099	467.672	484.896	458.506	485.834	472.311
792	35	3	3	50310114			0	1	1	35	35	1	2	3	35	5	3	2	2	2	4	4	503101	1	35	0	3	1	2	4	1	5031	503101	50310101	4	1	1	127.131	0	93	557.096	528.448	579.139	568.73	549.985	551.638	595.578	527.971	577.435
792	35	3	3	50310115			0	1	1	35	35	1	1	3	35	5	3	2	2	2	4	4	503101	1	35	0	3	1	2	4	1	5031	503101	50310101	5	1	1	127.131	0	93	505.453	502.974	478.891	498.312	506.996	539.058	522.06	497.88	521.226
792	35	3	3	50310116			1	2	1	35	35	2	1	3	35	3	4	1	1	1	1	1	503101	1	35	0	3	1	2	4	1	5031	503101	50310101	6	1	1	127.131	0	93	592.373	560.252	625.448	628.537	572.384	613.791	609.151	646.519	545.265
792	35	3	3	50310117			0	2	1	35	35	2	2	2	35	1	1	3	3	3	4	4	503101	1	35	0	3	1	2	4	1	5031	503101	50310101	17	1	1	127.131	0	93	471.944	476.78	467.499	476.77	484.559	423.841	461.925	414.783	445.868
792	35	3	3	50310120			0	1	1	35	35	1	1	3	35	3	3	2	2	1	4	4	503101	1	35	0	3	1	2	4	1	5031	503101	50310101	10	1	1	127.131	0	93	557.587	489.707	495.321	551.883	509.673	545.762	529.27	545.955	540.181
792	35	3	3	50310121			0	1	1	35	35	1	1	2	35	5	5	2	2	1	3	4	503101	1	35	0	3	1	2	4	1	5031	503101	50310101	8	1	1	127.131	0	93	610.399	593.822	569.933	577.925	571.265	583.217	568.352	511.116	588.947
792	35	3	3	50310123			1	2	1	35	35	2	1	3	35	3	2	2	2	2	5	2	503101	1	35	0	3	1	2	4	1	5031	503101	50310101	11	1	1	127.131	0	93	530.204	626.107	584.974	557.249	580.159	545.424	475.015	543.326	588.269
792	35	3	3	50310125			0	1	1	35	35	1	1	2	35	2	2	2	3	2	4	4	503101	1	35	0	3	1	2	4	1	5031	503101	50310101	9	1	1	127.131	0	93	483.932	559.687	531.048	510.413	480.696	552.055	541.481	549.813	618.084
792	35	3	3	50310126			1	1	1	35	35	1	2	3	35	2	1	2	3	2	5	2	503101	1	35	0	3	1	2	4	1	5031	503101	50310101	12	1	1	127.131	0	93	437.964	495.392	502.507	460.098	419.682	466.172	490.485	449.402	516.291
792	35	3	3	50310129			1	2	1	35	35	2	1	3	35	1	2	2	3	1	3	7	503101	1	35	0	3	1	2	4	1	5031	503101	50310101	1	1	1	127.131	0	93	480.126	512.096	499.449	472.335	487.556	483.585	474.004	474.276	468.614
792	35	3	3	50310130			1	2	1	35	35	2	3	3	35	1	2	2	3	1	3	7	503101	1	35	0	3	1	2	4	1	5031	503101	50310101	14	1	1	127.131	0	93	553.138	523.221	516.688	562.656	544.296	560.986	562.183	601.461	526.641
792	35	3	3	50310131			0	2	1	35	35	2	1	3	35	5	5	1	1	2	2	3	503101	1	35	0	3	1	2	4	1	5031	503101	50310101	2	1	1	127.131	0	93	579.124	562.5	561.41	567.677	552.827	560.973	537.117	550.364	523.62
792	35	3	3	50310132			0	1	1	35	35	1	1	2	35	1	1	2	3	3	4	1	503101	1	35	0	3	1	2	4	1	5031	503101	50310101	15	1	1	127.131	0	93	475.243	431	464.175	473.588	466.224	437.164	466.267	420.276	362.133
792	35	3	3	50310601			1	2	1	35	35	2	1	3	35	3	5	1	1	2	1	9	503102	2	35	0	3	1	2	4	1	5031	503106	50310202	3	1	1	122.969	0	93	534.046	525.914	512.016	491.115	483.624	547.68	523.831	484.85	471.589
792	35	3	3	50310602			0	2	1	35	35	2	1	3	35	1	1	2	3	2	5	5	503102	2	35	0	3	1	2	4	1	5031	503106	50310202	16	1	1	122.969	0	93	408.304	422.797	445.216	395.592	414.868	457.528	421.316	421.344	393.081
792	35	3	3	50310603			1	2	1	35	35	2	1	3	35	3	2	2	2	1	2	3	503102	2	35	0	3	1	2	4	1	5031	503106	50310202	17	1	1	122.969	0	93	550.467	592.403	643.714	557.995	547.337	533.379	650.732	544.024	576.896
792	35	3	3	50310604			0	2	1	35	35	2	2	2	35	1	2	2	3	2	3	7	503102	2	35	0	3	1	2	4	1	5031	503106	50310202	4	1	1	122.969	0	93	500.302	481.633	502.482	492.251	553.003	471.501	491.264	420.211	449.243
792	35	3	3	50310606			0	2	1	35	35	2	2	2	35	2	2	2	3	2	5	5	503102	2	35	0	3	1	2	4	1	5031	503106	50310202	18	1	1	122.969	0	93	492.009	504.695	482.353	497.12	553.054	560.782	517.876	485.189	547.106
792	35	3	3	50310607			0	2	1	35	35	2	1	3	35	1	1	2	3	3	4	4	503102	2	35	0	3	1	2	4	1	5031	503106	50310202	10	1	1	122.969	0	93	473.102	437.462	494.507	436.2	445.338	478.737	480.121	440.569	484.324
792	35	3	3	50310608			1	2	1	35	35	2	2	2	35	1	1	2	3	2	3	5	503102	2	35	0	3	1	2	4	1	5031	503106	50310202	5	1	1	122.969	0	93	480.876	479.609	422.26	439.707	400.524	467.36	409.447	449.93	400.546
792	35	3	3	50310609			0	1	1	35	35	1	1	2	35	2	2	2	2	2	3	9	503102	2	35	0	3	1	2	4	1	5031	503106	50310202	6	1	1	122.969	0	93	547.034	475.671	554.235	480.224	518.015	516.017	548.26	525.375	543.239
792	35	3	3	50310610			1	2	1	35	35	2	2	3	35	1	1	2	3	2	3	3	503102	2	35	0	3	1	2	4	1	5031	503106	50310202	7	1	1	122.969	0	93	545.791	543.821	559.631	484.369	531.277	528.667	501.416	563.823	491.322
792	35	3	3	50310611			1	2	1	35	35	2	1	3	35	3	4	2	2	1	3	3	503102	2	35	0	3	1	2	4	1	5031	503106	50310202	11	1	1	122.969	0	93	578.997	601.919	623.324	595.848	568.848	586.469	616.948	626.386	588.343
792	35	3	3	50310613			1	1	1	35	35	1	2	3	35	2	4	2	2	1	1	4	503102	2	35	0	3	1	2	4	1	5031	503106	50310202	8	1	1	122.969	0	93	543.431	500.431	497.613	523.162	544.844	511.787	570.452	527.537	560.946
792	35	3	3	50310614			0	1	1	35	35	1	1	2	35	3	3	2	2	2	5	3	503102	2	35	0	3	1	2	4	1	5031	503106	50310202	13	1	1	122.969	0	93	462.32	443.185	495.678	570.536	497.609	559.059	462.471	460.505	494.384
792	35	3	3	50310615			0	1	1	35	35	1	2	2	35	1	1	2	3	2	4	9	503102	2	35	0	3	1	2	4	1	5031	503106	50310202	9	1	1	122.969	0	93	544.515	518.376	553.121	544.364	521.991	530.567	501.485	523.551	516.454
792	35	3	3	50310616			0	1	1	35	35	1	2	3	35	3	3	2	2	2	2	5	503102	2	35	0	3	1	2	4	1	5031	503106	50310202	1	1	1	122.969	0	93	520.853	523.586	488.283	532.75	531.949	503.666	558.353	537.469	493.011
792	35	3	3	50310617			0	2	1	35	35	2	2	3	35	3	4	2	2	2	2	2	503102	2	35	0	3	1	2	4	1	5031	503106	50310202	14	1	1	122.969	0	93	428.12	458.078	453.265	465.266	474.104	425.518	458.908	408.453	441.173
792	35	3	3	50310618			0	1	1	35	35	1	1	2	35	4	5	2	2	2	5	4	503102	2	35	0	3	1	2	4	1	5031	503106	50310202	15	1	1	122.969	0	93	601.639	500.898	620.182	597.78	539.756	619.172	564.392	568.842	502.432
792	35	3	3	50310619			0	1	1	35	35	1	1	3	35	3	2	2	2	1	9	3	503102	2	35	0	3	1	2	4	1	5031	503106	50310202	2	1	1	122.969	0	93	491.029	467.405	470.696	493.176	455.532	494.109	506.034	539.102	439.026
792	35	3	3	50310620			1	1	1	35	35	1	1	3	35	3	2	2	2	1	2	1	503102	2	35	0	3	1	2	4	1	5031	503106	50310202	16	1	1	122.969	0	93	538.14	462.194	486.366	490.239	478.073	493.457	500.942	512.655	504.385
792	35	3	3	50310621			0	2	1	35	35	2	1	2	35	5	5	2	1	2	3	2	503102	2	35	0	3	1	2	4	1	5031	503106	50310202	17	1	1	122.969	0	93	560.973	534.797	568.979	557.571	511.895	513.217	552.517	536.297	532.552
792	35	3	3	50310622			0	2	1	35	35	2	1	3	35	3	3	2	2	2	4	4	503102	2	35	0	3	1	2	4	1	5031	503106	50310202	3	1	1	122.969	0	93	495.924	496.786	513.017	498.519	515.725	522.798	478.841	503.15	508.66
792	35	3	3	50310623			0	1	1	35	35	1	2	2	35	3	3	9	2	1	6	7	503102	2	35	0	3	1	2	4	1	5031	503106	50310202	18	1	1	122.969	0	93	528.084	560.707	523.511	527.541	571.122	516.822	590.303	510.574	541.094
792	35	3	3	50310624			0	2	1	35	35	2	1	1	35	3	4	2	2	1	5	5	503102	2	35	0	3	1	2	4	1	5031	503106	50310202	10	1	1	122.969	0	93	281.003	311.883	350.598	374.959	298.497	354.156	329.206	292.606	309.005
792	35	3	3	50310626			0	2	1	35	35	2	1	3	35	1	1	3	3	3	5	6	503102	2	35	0	3	1	2	4	1	5031	503106	50310202	5	1	1	122.969	0	93	523.307	536.768	568.835	517.639	533.304	549.41	515.985	511.218	559.626
792	35	3	3	50310629			0	2	1	35	35	2	2	2	35	2	2	3	3	2	5	4	503102	2	35	0	3	1	2	4	1	5031	503106	50310202	7	1	1	122.969	0	93	521.286	547.489	511.22	525.654	560.753	566.925	561.048	537.746	488.12
792	35	4	2	50320201			0	1	1	35	35	1	1	3	35	3	4	2	2	2	2	3	503201	1	35	0	2	1	2	4	1	5032	503202	50320101	1	1	1	132.654	1	21	511.95	534.811	545.325	553.794	497.899	563.288	542.24	597.037	531.526
792	35	4	2	50320202			1	2	1	35	35	2	1	2	35	4	5	2	1	2	1	3	503201	1	35	0	2	1	2	4	1	5032	503202	50320101	12	1	1	132.654	1	21	596.694	559.248	614.474	658.833	565.35	541.243	538.324	543.17	558.318
792	35	4	2	50320203			1	1	1	35	35	1	1	2	35	2	1	2	3	1	3	5	503201	1	35	0	2	1	2	4	1	5032	503202	50320101	2	1	1	132.654	1	21	468.278	465.958	469.298	480.197	522.693	509.034	442.137	453.557	459.928
792	35	4	2	50320204			1	2	1	35	35	2	3	2	35	4	5	2	2	3	3	5	503201	1	35	0	2	1	2	4	1	5032	503202	50320101	3	1	1	132.654	1	21	450.185	438.392	453.475	470.364	497.245	482.95	476.657	482.447	477.676
792	35	4	2	50320205			0	2	1	35	35	2	1	3	35	4	5	2	2	2	3	4	503201	1	35	0	2	1	2	4	1	5032	503202	50320101	13	1	1	132.654	1	21	496.916	467.626	461.59	507.981	472.747	468.312	447.713	445.381	455.974
792	35	4	2	50320207			1	1	1	35	35	1	1	2	35	1	2	2	3	3	3	5	503201	1	35	0	2	1	2	4	1	5032	503202	50320101	5	1	1	132.654	1	21	457.336	473.819	522.567	480.818	449.566	482.483	481.988	517.027	476.592
792	35	4	2	50320208			0	2	1	35	35	2	1	1	35	3	4	2	2	3	3	5	503201	1	35	0	2	1	2	4	1	5032	503202	50320101	6	1	1	132.654	1	21	442.229	366.627	351.474	392.168	326.921	362.869	351.199	408.798	334.137
792	35	4	2	50320209			0	1	1	35	35	1	1	2	35	5	4	2	1	1	3	2	503201	1	35	0	2	1	2	4	1	5032	503202	50320101	7	1	1	132.654	1	21	473	430.72	452.859	431.087	453.674	440.214	476.521	435.943	486.271
792	35	4	2	50320210			0	1	1	35	35	1	1	2	35	4	5	2	2	3	3	4	503201	1	35	0	2	1	2	4	1	5032	503202	50320101	14	1	1	132.654	1	21	444.561	472.102	451.81	473.828	460.79	414.515	388.072	421.457	417.223
792	35	4	2	50320211			0	1	1	35	35	1	1	1	35	3	3	2	2	3	5	3	503201	1	35	0	2	1	2	4	1	5032	503202	50320101	8	1	1	132.654	1	21	448.313	471.394	491.586	437.735	500.873	486.41	494.066	420.406	426.713
792	35	4	2	50320212			1	1	1	35	35	1	1	3	35	4	5	2	2	3	5	5	503201	1	35	0	2	1	2	4	1	5032	503202	50320101	9	1	1	132.654	1	21	584.122	553.122	547.501	559.021	559.779	543.949	511.757	599.938	516.994
792	35	4	2	50320213			0	1	2	35	35	1	1	3	35	3	3	2	2	2	3	3	503201	1	35	0	2	1	2	4	1	5032	503202	50320101	15	1	1	132.654	1	21	416.576	426.648	401.008	486.877	452.944	429.592	442.952	410.221	463.964
792	35	4	2	50320214			1	1	2	35	35	1	1	3	35	3	3	2	2	3	3	7	503201	1	35	0	2	1	2	4	1	5032	503202	50320101	16	1	1	132.654	1	21	482.418	474.452	585.035	469.516	473.114	467.904	464.961	499.116	447.12
792	35	4	2	50320215			0	2	2	35	35	2	1	3	35	5	5	2	2	1	3	6	503201	1	35	0	2	1	2	4	1	5032	503202	50320101	1	1	1	132.654	1	21	511.827	549.716	489.589	520.201	521.346	502.346	462.864	469.66	488.712
792	35	4	2	50320216			0	2	2	35	35	2	1	3	35	2	3	2	2	3	3	3	503201	1	35	0	2	1	2	4	1	5032	503202	50320101	17	1	1	132.654	1	21	465.875	449.324	480.663	482.345	462.493	484.399	516.538	488.39	494.152
792	35	4	2	50320217			1	2	2	35	35	2	1	2	35	4	4	2	2	2	5	5	503201	1	35	0	2	1	2	4	1	5032	503202	50320101	18	1	1	132.654	1	21	510.891	590.443	537.175	449.507	523.132	567.288	466.138	522.264	508.806
792	35	4	2	50320219			1	1	2	35	35	1	2	3	35	2	2	2	3	3	3	4	503201	1	35	0	2	1	2	4	1	5032	503202	50320101	10	1	1	132.654	1	21	361.327	360.101	364.09	368.831	305.309	254.267	335.414	357.893	293.7
792	35	4	2	50320220			0	1	2	35	35	1	1	2	35	4	5	2	2	3	4	6	503201	1	35	0	2	1	2	4	1	5032	503202	50320101	2	1	1	132.654	1	21	481.166	434.746	444.913	481.974	516.903	495.824	413.783	515.944	450.867
792	35	4	2	50320223			0	1	2	35	35	1	1	3	35	3	3	2	2	2	3	4	503201	1	35	0	2	1	2	4	1	5032	503202	50320101	3	1	1	132.654	1	21	430.176	421.916	439.786	436.58	438.604	477.694	419.929	473.607	473.07
792	35	4	2	50320224			0	1	2	35	35	1	1	2	35	1	2	2	3	3	3	5	503201	1	35	0	2	1	2	4	1	5032	503202	50320101	4	1	1	132.654	1	21	393.266	446.009	354.925	398.338	404.337	319.097	320.027	334.185	454.598
792	35	4	2	50320225			0	2	2	35	35	2	2	3	35	2	2	2	2	3	1	3	503201	1	35	0	2	1	2	4	1	5032	503202	50320101	12	1	1	132.654	1	21	416.612	377.309	342.177	341.244	379.555	395.146	397.435	378.758	335.58
792	35	4	2	50320226			0	1	2	35	35	1	1	3				9					503201	1	35	0	2	1	2	4	1	5032	503202	50320101	13	1	1	132.654	1	21	527.447	487.368	496.838	506.63	511.341	552.975	478.102	458.362	506.146
792	35	4	2	50320227			1	2	2	35	35	2	1	2	35	3	3	2	2	3	4	5	503201	1	35	0	2	1	2	4	1	5032	503202	50320101	14	1	1	132.654	1	21	375.529	459.908	397.267	430.779	413.729	400.066	369.939	403.686	362.855
792	35	4	2	50320702			1	1	1	35	35	1	2	2	35	3	3	2	3	3	5	5	503202	2	35	0	2	1	2	4	1	5032	503207	50320202	5	1	1	137.721	1	21	440.964	407.225	454.221	440.715	435.773	438.169	397.55	478.092	399.1
792	35	4	2	50320703			1	2	1	35	35	2	2	1	35	4	4	2	2	3	5	5	503202	2	35	0	2	1	2	4	1	5032	503207	50320202	16	1	1	137.721	1	21	301.109	402.408	344.365	351.525	352.17	378.302	387.961	304.255	378.449
792	35	4	2	50320704			0	2	1	35	35	2	1	2	35	2	4	2	3	3	5	5	503202	2	35	0	2	1	2	4	1	5032	503207	50320202	6	1	1	137.721	1	21	406.213	374.916	427.865	451.326	468.385	432.82	384.951	415.343	421.437
792	35	4	2	50320705			0	1	1	35	35	1	3	1	35	3	4	2	2	3	4	5	503202	2	35	0	2	1	2	4	1	5032	503207	50320202	17	1	1	137.721	1	21	374.404	392.218	384.477	371.97	373.141	355.346	332.929	432.374	421.645
792	35	4	2	50320706			0	2	1	35	35	2	2	2	35	4	4	2	2	2	3	4	503202	2	35	0	2	1	2	4	1	5032	503207	50320202	18	1	1	137.721	1	21	487.791	492.013	605.934	453.441	490.919	567.701	525.418	623.841	512.155
792	35	4	2	50320707			1	1	1	35	35	1	2	2	35	2	2	2	3	1	3	4	503202	2	35	0	2	1	2	4	1	5032	503207	50320202	7	1	1	137.721	1	21	288.628	322.696	337.754	302.565	345.785	450.14	322.478	298.205	298.963
792	35	4	2	50320709			0	1	1	35	35	1	1	2	35	2	2	2	2	1	4	2	503202	2	35	0	2	1	2	4	1	5032	503207	50320202	9	1	1	137.721	1	21	414.422	426.88	443.39	400.922	403.935	372.799	347.54	371.328	403.329
792	35	4	2	50320711			1	1	1	35	35	1	1	3	35	4	4	2	2	3	4	2	503202	2	35	0	2	1	2	4	1	5032	503207	50320202	2	1	1	137.721	1	21	425.461	477.111	433.071	455.515	513.959	409.892	455.685	460.793	449.033
792	35	4	2	50320712			0	1	1	35	35	1	1	2	35	4	5	2	2	2	3	4	503202	2	35	0	2	1	2	4	1	5032	503207	50320202	10	1	1	137.721	1	21	555.202	575.25	529.066	483.225	559.782	487.239	536.45	461.198	538.003
792	35	4	2	50320713			1	1	1	35	35	1	1	2	35	3	4	2	2	2	4	5	503202	2	35	0	2	1	2	4	1	5032	503207	50320202	11	1	1	137.721	1	21	251.765	294.194	260.618	307.919	283.73	310.308	254.716	293.201	313.152
792	35	4	2	50320718			0	2	1	35	35	2	1	2	35	2	2	2	3	3	5	6	503202	2	35	0	2	1	2	4	1	5032	503207	50320202	3	1	1	137.721	1	21	494.818	483.044	469.605	408.315	501.157	517.739	539.848	524.325	425.331
792	35	4	2	50320720			0	2	1	35	35	2	2	2	35	3	3	2	3	3	5	5	503202	2	35	0	2	1	2	4	1	5032	503207	50320202	5	1	1	137.721	1	21	448.735	410.217	478.174	370.605	456.488	406.314	449.086	439.529	379.95
792	35	2	3	50330201			0	1	1	35	35	1	1	2				9					503301	1	35	0	2	1	2	4	1	5033	503302	50330101	15	1	1	98.2057	1	18	506.276	457.949	469.473	518.678	538.655	497.482	557.238	476.12	561.016
792	35	2	3	50330203			1	2	1	35	35	2	1	2	35	3	4	2	2	2	2	5	503301	1	35	0	2	1	2	4	1	5033	503302	50330101	1	1	1	98.2057	1	18	561.998	535.108	543.18	548.554	553.01	542.468	595.55	544.366	513.667
792	35	2	3	50330204			0	2	1	35	35	2	1	2	35	4	5	2	2	1	3	4	503301	1	35	0	2	1	2	4	1	5033	503302	50330101	2	1	1	98.2057	1	18	512.119	524.033	489.217	522.699	560.011	518.292	538.22	507.585	492.183
792	35	2	3	50330206			0	1	1	35	35	1	1	3	35	5	5	1	1	2	1	1	503301	1	35	0	2	1	2	4	1	5033	503302	50330101	18	1	1	98.2057	1	18	586.495	644.478	577.617	543.696	613.882	598.827	573.26	591.944	575.855
792	35	2	3	50330207			0	2	1	35	35	2	1	3	35	4	4	2	2	9	3	5	503301	1	35	0	2	1	2	4	1	5033	503302	50330101	3	1	1	98.2057	1	18	465.108	518.463	448.447	451.316	494.799	486.949	536.003	445.591	509.501
792	35	2	3	50330208			0	1	1	35	35	1	1	2				9					503301	1	35	0	2	1	2	4	1	5033	503302	50330101	10	1	1	98.2057	1	18	555.677	581.387	623.717	622.401	608.44	621.325	540.288	534.269	661.487
792	35	2	3	50330209			0	2	1	35	35	2	1	3	35	3	2	2	2	2	1	3	503301	1	35	0	2	1	2	4	1	5033	503302	50330101	11	1	1	98.2057	1	18	526.033	514.258	475.024	503.476	518.5	530.588	504.68	518.817	538.972
792	35	2	3	50330210			0	2	1	35	35	2	1	3	35	3	3	2	2	1	1	3	503301	1	35	0	2	1	2	4	1	5033	503302	50330101	12	1	1	98.2057	1	18	525.434	537.179	512.083	560.394	539.543	479.77	436.635	450.708	494.564
792	35	2	3	50330211			1	1	1	35	35	1	1	3	35	2	3	2	2	2	3	4	503301	1	35	0	2	1	2	4	1	5033	503302	50330101	13	1	1	98.2057	1	18	442.433	451.586	474.688	457.269	463.733	489.446	481.483	462.281	429.636
792	35	2	3	50330212			0	2	1	35	35	2	2	9	35	3	3	2	2	3	2	3	503301	1	35	0	2	1	2	4	1	5033	503302	50330101	4	1	1	98.2057	1	18	508.641	508.424	465.338	517.132	442.727	482.433	532.759	528.593	541.6
792	35	2	3	50330213			0	2	1	35	35	2	2	2	35	3	3	2	2	2	5	2	503301	1	35	0	2	1	2	4	1	5033	503302	50330101	5	1	1	98.2057	1	18	497.105	471.63	521.242	489.807	526.207	561.814	494.112	525.967	474.592
792	35	2	3	50330214			0	2	1	35	35	2	2	2	35	2	2	2	2	1	1	1	503301	1	35	0	2	1	2	4	1	5033	503302	50330101	14	1	1	98.2057	1	18	518.297	570.177	538.49	538.005	599.543	535.192	506.64	523.066	576.808
792	35	2	3	50330215			1	2	1	35	35	2	1	2	35	5	5	1	1	2	1	3	503301	1	35	0	2	1	2	4	1	5033	503302	50330101	6	1	1	98.2057	1	18	506.105	539.117	542.717	526.437	490.179	460.419	516.077	520.59	493.122
792	35	2	3	50330216			0	1	2	35	35	1	1	3	35	5	5	1	1	2	1	3	503301	1	35	0	2	1	2	4	1	5033	503302	50330101	7	1	1	98.2057	1	18	474.664	528.394	544.422	549.16	537.469	541.945	539.179	547.893	533.387
792	35	2	3	50330217			0	1	2	35	35	1	1	3	35	2	1	2	3	2	3	5	503301	1	35	0	2	1	2	4	1	5033	503302	50330101	8	1	1	98.2057	1	18	456.389	428.867	404.751	410.811	408.244	394.051	462.789	455.975	387.6
792	35	2	3	50330218			0	1	2	35	35	1	2	3	35	2	2	2	2	2	1	1	503301	1	35	0	2	1	2	4	1	5033	503302	50330101	15	1	1	98.2057	1	18	448.735	385.947	433.397	432.576	478.606	375.348	421.392	470.676	444.488
792	35	2	3	50330219			1	2	2	35	35	2	1	2	35	2	1	2	3	3	3	6	503301	1	35	0	2	1	2	4	1	5033	503302	50330101	16	1	1	98.2057	1	18	462.027	495.849	471.043	487.19	497.744	503.804	512.218	503.944	465.576
792	35	2	3	50330220			0	2	2	35	35	2	1	1	35	2	3	2	2	2	3	2	503301	1	35	0	2	1	2	4	1	5033	503302	50330101	9	1	1	98.2057	1	18	616.776	571.848	604.861	621.451	570.051	583.895	529.088	580.861	594.224
792	35	2	3	50330221			0	1	2	35	35	1	2	9	35	2	4	2	2	2	3	1	503301	1	35	0	2	1	2	4	1	5033	503302	50330101	1	1	1	98.2057	1	18	414.806	359.681	375.329	412.399	396.346	439.933	414.732	464.677	364.599
792	35	2	3	50330222			0	2	2	35	35	2	1	3	35	2	2	2	2	3	1	9	503301	1	35	0	2	1	2	4	1	5033	503302	50330101	2	1	1	98.2057	1	18	378.632	400.947	369.415	412.953	337.014	382.18	353.989	318.398	335.164
792	35	2	3	50330223			0	1	2	35	35	1	1	2	35	1	3	2	2	3	3	2	503301	1	35	0	2	1	2	4	1	5033	503302	50330101	17	1	1	98.2057	1	18	568.504	553.188	561.985	542.187	536.113	540.159	517.282	495.07	593.926
792	35	2	3	50330224			0	2	2	35	35	2	1	2	35	2	2	2	2	2	1	3	503301	1	35	0	2	1	2	4	1	5033	503302	50330101	18	1	1	98.2057	1	18	468.667	468.285	471.646	439.396	442.264	440.465	433.701	419.992	431.229
792	35	2	3	50330225			1	1	2	35	35	1	2	2	35	2	1	3	3	1	5	9	503301	1	35	0	2	1	2	4	1	5033	503302	50330101	3	1	1	98.2057	1	18	376.161	349.27	367.133	354.249	423.93	388.63	366.79	354.732	391.112
792	35	2	3	50330226			1	2	2	35	35	2	1	2	35	4	3	2	2	1	4	4	503301	1	35	0	2	1	2	4	1	5033	503302	50330101	4	1	1	98.2057	1	18	521.869	501.297	463.298	465.077	479.154	482.69	508.759	444.596	426.123
792	35	2	3	50330227			0	2	2	35	35	2	1	3	35	2	2	2	2	3	3	1	503301	1	35	0	2	1	2	4	1	5033	503302	50330101	5	1	1	98.2057	1	18	618.823	576.794	590.799	596.919	577.725	601.903	589.719	591.643	573.751
792	35	2	3	50330228			0	2	2	35	35	2	1	2	35	1	9	2	2	2	3	2	503301	1	35	0	2	1	2	4	1	5033	503302	50330101	6	1	1	98.2057	1	18	372.347	409.497	390.284	383.731	395.01	388.213	386.657	384.723	387.648
792	35	2	3	50330229			1	2	2	35	35	2	1	2	35	4	4	2	2	2	3	4	503301	1	35	0	2	1	2	4	1	5033	503302	50330101	10	1	1	98.2057	1	18	539.009	456.441	485.26	513.579	418.061	462.758	548.469	492.351	457.691
792	35	2	3	50330230			1	1	2	35	35	1	1	3	35	2	3	2	2	2	1	3	503301	1	35	0	2	1	2	4	1	5033	503302	50330101	11	1	1	98.2057	1	18	599.175	554.003	620.747	635.985	648.421	620.772	646.816	577.342	633.208
792	35	2	3	50330401			1	2	1	35	35	2	1	3	35	1	1	2	3	2	5	5	503302	2	35	0	3	1	2	4	1	5033	503304	50330202	12	1	1	101.592	1	18	282.918	296.963	338.69	364.927	302.159	365.933	356.176	339.766	312.673
792	35	2	3	50330403			0	1	1	35	35	1	1	2	35	2	2	3	3	3	5	4	503302	2	35	0	3	1	2	4	1	5033	503304	50330202	8	1	1	101.592	1	18	451.347	405.231	416.58	406.984	387.593	445.33	444.126	454.629	428.424
792	35	2	3	50330404			1	2	1	35	35	2	1	3	35	3	2	2	3	3	4	5	503302	2	35	0	3	1	2	4	1	5033	503304	50330202	9	1	1	101.592	1	18	511.933	509.141	515.823	470.045	502.352	452.952	492.219	467.442	460.073
792	35	2	3	50330405			0	1	1	35	35	1	1	3	35	4	5	2	1	2	2	3	503302	2	35	0	3	1	2	4	1	5033	503304	50330202	13	1	1	101.592	1	18	528.701	564.656	515.148	493.138	565.197	491.901	590.345	569.639	546.312
792	35	2	3	50330406			1	2	1	35	35	2	1	3	35	5	5	1	1	2	1	3	503302	2	35	0	3	1	2	4	1	5033	503304	50330202	14	1	1	101.592	1	18	509.813	470.99	493.711	546.267	475.142	467.845	513.514	494.782	550.134
792	35	2	3	50330407			0	1	1	35	35	1	1	2	35	2	2	2	2	2	3	1	503302	2	35	0	3	1	2	4	1	5033	503304	50330202	15	1	1	101.592	1	18	419.54	457.501	398.07	492.24	463.272	487.929	462.02	448.788	448.587
792	35	2	3	50330408			0	1	1	35	35	1	1	2	35	3	4	2	2	3	5	4	503302	2	35	0	3	1	2	4	1	5033	503304	50330202	16	1	1	101.592	1	18	412.758	359.976	448.359	369.472	390.861	361.167	424.491	374.86	393.647
792	35	2	3	50330409			1	1	1	35	35	1	1	2	35	2	2	2	2	2	2	3	503302	2	35	0	3	1	2	4	1	5033	503304	50330202	17	1	1	101.592	1	18	595.125	638.739	652.999	554.204	595.877	650.678	577.653	608.274	542.036
792	35	2	3	50330410			0	1	1	35	35	1	1	3	35	5	5	2	2	1	3	4	503302	2	35	0	3	1	2	4	1	5033	503304	50330202	1	1	1	101.592	1	18	607.782	559.929	517.158	525.77	548.908	522.094	605.457	575.097	552.945
792	35	2	3	50330411			0	1	1	35	35	1	1	3	35	4	4	2	2	1	2	5	503302	2	35	0	3	1	2	4	1	5033	503304	50330202	18	1	1	101.592	1	18	554.875	587.962	539.137	523.235	618.442	484.003	552.699	505.98	491.821
792	35	2	3	50330414			1	2	1	35	35	2	1	3	35	3	4	2	2	3	1	3	503302	2	35	0	3	1	2	4	1	5033	503304	50330202	3	1	1	101.592	1	18	538.877	542.523	550.149	573.057	578.558	529.738	533.416	518.528	487.381
792	35	2	3	50330415			0	2	1	35	35	2	2	3	35	3	3	2	2	2	3	2	503302	2	35	0	3	1	2	4	1	5033	503304	50330202	11	1	1	101.592	1	18	561.46	567.142	536.85	570.184	586.204	524.914	606.26	576.768	546.498
792	35	2	3	50330416			1	2	2	35	35	2	1	3	35	4	4	2	2	2	3	5	503302	2	35	0	3	1	2	4	1	5033	503304	50330202	4	1	1	101.592	1	18	511.031	561.355	566.187	548.566	550.632	515.232	567.86	534.546	541.595
792	35	2	3	50330417			0	1	2	35	35	1	2	2	35	4	4	2	2	2	4	4	503302	2	35	0	3	1	2	4	1	5033	503304	50330202	5	1	1	101.592	1	18	503.369	457.496	502.017	488.826	494.605	464.419	474.777	458.719	516.054
792	35	2	3	50330418			0	2	2	35	35	2	2	2	35	2	2	3	3	2	5	6	503302	2	35	0	3	1	2	4	1	5033	503304	50330202	6	1	1	101.592	1	18	384.505	390.015	358.653	373.47	360.537	361.201	374.63	393.686	382.203
792	35	2	3	50330419			0	2	2	35	35	2	3	3	35	3	2	2	2	3	3	4	503302	2	35	0	3	1	2	4	1	5033	503304	50330202	7	1	1	101.592	1	18	259.98	306.372	267.795	286.451	211.21	325.008	258.572	306.541	234.715
792	35	2	3	50330420			1	1	2	35	35	1	1	3	35	1	3	2	2	2	3	2	503302	2	35	0	3	1	2	4	1	5033	503304	50330202	8	1	1	101.592	1	18	543.953	509.671	525.261	531.848	487.086	466.207	484.692	490.422	502.392
792	35	2	3	50330421			0	1	2	35	35	1	1	3	35	3	4	2	2	3	2	4	503302	2	35	0	3	1	2	4	1	5033	503304	50330202	9	1	1	101.592	1	18	390.158	342.475	342.906	406.36	333.092	309.215	371.126	397.846	341.726
792	35	2	3	50330422			1	2	2	35	35	2	1	3	35	3	2	2	2	2	1	3	503302	2	35	0	3	1	2	4	1	5033	503304	50330202	1	1	1	101.592	1	18	611.137	600.426	608.746	597.76	606.694	604.3	671.206	592.92	649.906
792	35	2	3	50330423			0	2	2	35	35	2	3	2	35	5	3	2	2	1	3	5	503302	2	35	0	3	1	2	4	1	5033	503304	50330202	12	1	1	101.592	1	18	324.426	267.44	292.396	316.693	373.624	257.302	326.147	276.459	286.505
792	35	2	3	50330424			0	1	2	35	35	1	2	2	35	1	1	3	3	2	5	6	503302	2	35	0	3	1	2	4	1	5033	503304	50330202	13	1	1	101.592	1	18	369.476	363.064	377.798	348.036	402.521	520.562	405.418	411.503	349.832
792	35	2	3	50330425			0	1	2	35	35	1	1	3	35	3	4	2	2	2	4	4	503302	2	35	0	3	1	2	4	1	5033	503304	50330202	14	1	1	101.592	1	18	380.959	364.512	386.271	330.645	393.672	351.91	459.525	354.502	362.276
792	35	2	3	50330426			0	2	2	35	35	2	1	3	35	3	3	2	2	9	3	5	503302	2	35	0	3	1	2	4	1	5033	503304	50330202	2	1	1	101.592	1	18	390.273	339.547	316.14	311.62	333.185	265.379	372.501	333.577	322.782
792	35	2	3	50330427			0	1	2	35	35	1	1	3	35	2	2	2	3	1	5	4	503302	2	35	0	3	1	2	4	1	5033	503304	50330202	15	1	1	101.592	1	18	520.601	559.803	522.644	504.209	576.993	494.127	561.605	500.492	494.713
792	35	2	3	50330428			0	2	2	35	35	2	2	2				9					503302	2	35	0	3	1	2	4	1	5033	503304	50330202	3	1	1	101.592	1	18	510.553	503.091	435.629	487.219	483.834	523.329	488.507	511.375	439.884
792	35	2	3	50330429			1	2	2	35	35	2	1	3	35	3	2	2	2	2	1	4	503302	2	35	0	3	1	2	4	1	5033	503304	50330202	16	1	1	101.592	1	18	512.899	501.06	496.769	457.087	474.67	462.772	475.571	453.562	402.833
792	35	2	3	50330430			0	2	2	35	35	2	3	2	35	4	4	2	2	2	3	5	503302	2	35	0	3	1	2	4	1	5033	503304	50330202	17	1	1	101.592	1	18	450.659	424.233	369.762	416.482	373.649	430.028	390.265	397.976	395.698
792	35	2	3	50330431			0	2	2	35	35	2	1	3	35	2	3	2	3	2	4	5	503302	2	35	0	3	1	2	4	1	5033	503304	50330202	18	1	1	101.592	1	18	517.599	457.498	540.758	491.066	502.126	492.224	454.408	465.334	467.5
792	35	2	3	50330432			0	1	2	35	35	1	1	3	35	3	3	2	2	2	3	4	503302	2	35	0	3	1	2	4	1	5033	503304	50330202	4	1	1	101.592	1	18	463.227	441.088	447.134	475.34	445.498	443.463	415.707	400.088	382.881
792	35	1	4	50340201			0	2	1	35	35	2	1	3	35	2	3	2	2	1	1	7	503401	1	35	0	2	1	2	4	1	5034	503402	50340101	5	1	1	141.586	1	28	596.31	584.089	576.545	551.055	580.104	570.28	575.238	559.024	611.818
792	35	1	4	50340202			1	2	1	35	35	2	1	3	35	3	5	1	1	2	1	1	503401	1	35	0	2	1	2	4	1	5034	503402	50340101	16	1	1	141.586	1	28	631.459	592.584	589.648	561.804	644.379	622.202	642.186	567.363	579.765
792	35	1	4	50340203			0	2	1	35	35	2	1	2	35	2	4	2	2	2	1	4	503401	1	35	0	2	1	2	4	1	5034	503402	50340101	6	1	1	141.586	1	28	567.98	590.746	564.758	560.778	567.897	549.809	561.339	567.188	487.579
792	35	1	4	50340204			0	1	1	35	35	1	1	3	35	5	5	1	1	1	1	1	503401	1	35	0	2	1	2	4	1	5034	503402	50340101	17	1	1	141.586	1	28	587.964	600.967	605.692	588.494	535.012	618.2	562.563	583.936	610.623
792	35	1	4	50340205			0	1	1	35	35	1	1	3	35	5	5	1	1	1	1	1	503401	1	35	0	2	1	2	4	1	5034	503402	50340101	18	1	1	141.586	1	28	560.534	588.824	657.846	648.14	687.14	646.021	696.72	679.39	674.092
792	35	1	4	50340206			0	1	1	35	35	1	1	3	35	3	3	1	1	1	1	1	503401	1	35	0	2	1	2	4	1	5034	503402	50340101	10	1	1	141.586	1	28	615.539	614.332	579.542	606.205	640.213	529.951	636.249	618.935	622.623
792	35	1	4	50340207			0	2	1	35	35	2	3	3	35	3	5	1	1	1	1	1	503401	1	35	0	2	1	2	4	1	5034	503402	50340101	7	1	1	141.586	1	28	550.516	581.072	564.685	549.63	529.721	503.466	547.25	540.995	493.372
792	35	1	4	50340208			0	2	1	35	35	2	2	3	35	1	1	2	2	2	1	1	503401	1	35	0	2	1	2	4	1	5034	503402	50340101	11	1	1	141.586	1	28	599.385	567.368	548.816	542.159	573.197	507.398	561.35	542.99	568.453
792	35	1	4	50340209			0	2	1	35	35	2	2	3	35	3	3	2	2	1	3	4	503401	1	35	0	2	1	2	4	1	5034	503402	50340101	8	1	1	141.586	1	28	594.729	542.846	567.253	575.563	558.145	581.045	579.805	518.066	563.428
792	35	1	4	50340210			0	1	1	35	35	1	3	3	35	4	5	1	1	1	1	1	503401	1	35	0	2	1	2	4	1	5034	503402	50340101	12	1	1	141.586	1	28	530.328	564.834	556.342	547.334	525.643	530.652	568.507	588.255	543.693
792	35	1	4	50340211			1	2	1	35	35	2	1	9				9					503401	1	35	0	2	1	2	4	1	5034	503402	50340101	13	1	1	141.586	1	28	424.344	431.243	494.772	422.447	404.635	453.517	435.678	418.202	444.1
792	35	1	4	50340212			0	2	1	35	35	2	3	3	35	1	4	2	2	3	3	1	503401	1	35	0	2	1	2	4	1	5034	503402	50340101	14	1	1	141.586	1	28	579.257	601.735	521.943	662.478	610.514	614.097	618.844	609.848	650.324
792	35	1	4	50340213			1	2	1	35	35	2	2	3	35	4	5	1	1	2	1	1	503401	1	35	0	2	1	2	4	1	5034	503402	50340101	9	1	1	141.586	1	28	584.895	590.678	549.944	605.9	567.15	624.87	558.972	609.225	572.985
792	35	1	4	50340215			0	1	1	35	35	1	1	3	35			9					503401	1	35	0	2	1	2	4	1	5034	503402	50340101	2	1	1	141.586	1	28	677.713	566.995	606.329	605.347	612.545	606.235	626.314	663.851	599.64
792	35	1	4	50340216			1	2	1	35	35	2	3	3	35	5	4	2	1	1	1	1	503401	1	35	0	2	1	2	4	1	5034	503402	50340101	3	1	1	141.586	1	28	518.57	504.384	490.84	464.647	507.203	485.569	467.436	403.281	527.913
792	35	4	2	50350101			0	2	1	35	35	2	2	3	35	2	1	2	2	2	3	2	503501	1	35	0	3	1	2	4	1	5035	503501	50350101	11	1	1	247.215	1	44	450.143	420.712	412.388	479.024	430.185	443.524	440.162	436.524	502.409
792	35	4	2	50350104			0	1	1	35	35	1	1	2	35	2	2	3	3	2	5	5	503501	1	35	0	3	1	2	4	1	5035	503501	50350101	5	1	1	247.215	1	44	590.73	600.908	622.845	626.712	679.114	581.077	621.332	598.295	580.506
792	35	4	2	50350105			1	2	1	35	35	2	1	3	35	2	9	2	2	2	2	4	503501	1	35	0	3	1	2	4	1	5035	503501	50350101	12	1	1	247.215	1	44	484.178	539.007	495.868	530.886	546.114	552.481	526.595	499.489	501.643
792	35	4	2	50350107			0	1	1	35	35	1	1	2	35	2	2	3	3	2	5	5	503501	1	35	0	3	1	2	4	1	5035	503501	50350101	6	1	1	247.215	1	44	450.044	445.243	463.524	493.576	485.886	444.89	414.699	470.669	486.621
792	35	4	2	50350108			0	1	1	35	35	1	1	3	35	3	3	2	2	1	3	4	503501	1	35	0	3	1	2	4	1	5035	503501	50350101	7	1	1	247.215	1	44	502.206	508.309	540.355	551.165	541.235	591.986	573.535	533.091	574.396
792	35	4	2	50350109			1	1	1	35	35	1	1	3	35	3	2	2	3	1	4	5	503501	1	35	0	3	1	2	4	1	5035	503501	50350101	8	1	1	247.215	1	44	509.122	568.763	532.07	515.426	512.483	584.525	486.875	538.298	500.805
792	35	4	2	50350112			0	2	1	35	35	2	1	3	35	2	1	2	3	2	3	4	503501	1	35	0	3	1	2	4	1	5035	503501	50350101	2	1	1	247.215	1	44	457.907	462.27	408.6	423.546	469.306	416.153	456.148	466.179	452.729
792	35	4	2	50350113			0	2	1	35	35	2	1	2	35	4	3	2	2	1	2	3	503501	1	35	0	3	1	2	4	1	5035	503501	50350101	3	1	1	247.215	1	44	505.596	588.649	586.869	524.384	574.716	574.903	557.887	554.402	552.664
792	35	4	2	50350114			0	2	1	35	35	2	1	3	35	1	4	2	2	2	4	3	503501	1	35	0	3	1	2	4	1	5035	503501	50350101	13	1	1	247.215	1	44	487.959	353.971	399.928	385.099	414.569	367.662	425.608	370.376	393.504
792	35	4	2	50350116			0	2	1	35	35	2	2	3	35	2	2	2	2	2	3	3	503501	1	35	0	3	1	2	4	1	5035	503501	50350101	14	1	1	247.215	1	44	425.164	399.446	421.77	430.996	405.273	470.377	431.015	440.744	443.248
792	35	4	2	50350118			0	1	1	35	35	1	1	3	35	3	2	2	2	3	1	3	503501	1	35	0	3	1	2	4	1	5035	503501	50350101	15	1	1	247.215	1	44	620.184	615.581	631.849	535.143	653.433	631.626	640.694	679.169	591.492
792	35	4	2	50350120			0	1	1	35	35	1	1	3	35	5	5	2	1	1	1	4	503501	1	35	0	3	1	2	4	1	5035	503501	50350101	16	1	1	247.215	1	44	483.653	530.828	487.738	520.268	553.798	496.07	512.426	526.374	505.407
792	35	4	2	50350121			1	2	1	35	35	2	1	3	35	2	9	9	3	2	4	9	503501	1	35	0	3	1	2	4	1	5035	503501	50350101	17	1	1	247.215	1	44	466.249	547.329	534.39	469.129	528.375	456.982	518.689	503.978	508.647
792	35	4	2	50350122			1	1	2	35	35	1	1	3				9					503501	1	35	0	3	1	2	4	1	5035	503501	50350101	6	1	1	247.215	1	44	459.124	461.676	449.545	438.989	444.138	430.588	491.141	416.17	408.213
792	35	4	2	50350123			0	1	2	35	35	1	1	2	35	3	4	2	2	1	3	3	503501	1	35	0	3	1	2	4	1	5035	503501	50350101	7	1	1	247.215	1	44	460.497	462.678	530.715	490.265	511.877	505.254	423.766	460.235	483.763
792	35	4	2	50350124			0	1	2	35	35	1	1	2	35	2	1	2	3	2	4	3	503501	1	35	0	3	1	2	4	1	5035	503501	50350101	18	1	1	247.215	1	44	550.012	552.259	541.369	566.055	581.226	589.238	485.847	549.952	594.309
792	35	4	2	50350125			0	1	2	35	35	1	1	3	35	2	4	2	2	2	3	3	503501	1	35	0	3	1	2	4	1	5035	503501	50350101	10	1	1	247.215	1	44	440.635	455.587	516.175	462.295	462.381	502.223	458.836	463.14	536.856
792	35	4	2	50350126			0	1	2	35	35	1	2	3	35	1	2	2	2	2	2	9	503501	1	35	0	3	1	2	4	1	5035	503501	50350101	8	1	1	247.215	1	44	453.98	444.343	481.541	435.557	433.607	468.958	444.184	514.8	494.107
792	35	4	2	50350127			0	1	2	35	35	1	1	3	35	3	3	2	2	2	3	4	503501	1	35	0	3	1	2	4	1	5035	503501	50350101	11	1	1	247.215	1	44	528.327	512.133	531.453	491.097	510.688	477.205	453.728	485.269	497.903
792	35	4	2	50350128			0	2	2	35	35	2	3	2	35	1	3	2	3	3	3	4	503501	1	35	0	3	1	2	4	1	5035	503501	50350101	12	1	1	247.215	1	44	534.577	507.708	528.003	551.584	547.245	549.414	505.391	492.32	541.795
792	35	4	2	50350129			1	2	2	35	35	2	2	3	35	2	2	2	2	2	4	2	503501	1	35	0	3	1	2	4	1	5035	503501	50350101	13	1	1	247.215	1	44	525.565	502.764	540.632	463.219	567.076	557.673	474.026	516.779	433.065
792	35	4	2	50350134			1	2	2	35	35	2	2	1	35	1	3	2	3	2	3	5	503501	1	35	0	3	1	2	4	1	5035	503501	50350101	16	1	1	247.215	1	44	552.392	549.085	588.155	548.789	591.779	582.747	555.703	532.242	546.524
792	35	4	2	50350135			0	2	2	35	35	2	2	2	35	2	4	2	2	2	4	5	503501	1	35	0	3	1	2	4	1	5035	503501	50350101	17	1	1	247.215	1	44	422.244	430.183	506.485	478.259	409.231	437.018	452.749	465.67	458.537
792	35	4	2	50350138			1	1	2	35	35	1	1	2	35	3	3	2	2	1	3	5	503501	1	35	0	3	1	2	4	1	5035	503501	50350101	11	1	1	247.215	1	44	674.64	664.937	561.465	650.554	658.724	576.126	659.87	625.4	575.297
792	35	4	2	50350139			0	1	2	35	35	1	1	3	35	4	3	2	2	2	1	4	503501	1	35	0	3	1	2	4	1	5035	503501	50350101	2	1	1	247.215	1	44	346.994	390.626	432.109	358.929	439.658	439.348	523.519	458.905	439.338
792	35	4	2	50350140			0	2	2	35	35	2	2	3	35	2	2	2	2	2	1	2	503501	1	35	0	3	1	2	4	1	5035	503501	50350101	12	1	1	247.215	1	44	610.577	520.485	599.032	590.319	559.13	569.738	471.556	506.009	574.048
792	35	4	2	50350143			0	2	2	35	35	2	1	2				9					503501	1	35	0	3	1	2	4	1	5035	503501	50350101	13	1	1	247.215	1	44	396.068	446.61	378.399	442.982	466.531	396.002	441.93	398.245	433.019
792	35	1	4	50360201			0	1	1	35	35	1	2	3	35	5	4	1	1	1	9	1	503601	1	35	0	3	1	2	4	1	5036	503602	50360101	6	1	1	259.158	0	87	530.058	521.869	507.876	548.79	598.214	502.653	577.097	542.834	551.604
792	35	1	4	50360202			1	2	1	35	35	2	1	2	35	5	4	2	1	2	1	3	503601	1	35	0	3	1	2	4	1	5036	503602	50360101	11	1	1	259.158	0	87	561.058	513.318	540.501	463.02	492.36	560.148	501.382	506.242	513.342
792	35	1	4	50360203			0	2	1	35	35	2	1	3	35	3	5	1	1	1	1	1	503601	1	35	0	3	1	2	4	1	5036	503602	50360101	12	1	1	259.158	0	87	592.151	626.075	590.147	578.146	591.912	538.971	585.003	612.392	562.123
792	35	1	4	50360204			0	1	1	35	35	1	1	3	35	5	5	1	1	1	1	1	503601	1	35	0	3	1	2	4	1	5036	503602	50360101	13	1	1	259.158	0	87	615.032	611.818	554.326	610.878	609.486	568.723	573.263	561.396	575.241
792	35	1	4	50360205			0	1	1	35	35	1	1	3	35	5	4	2	2	1	3	4	503601	1	35	0	3	1	2	4	1	5036	503602	50360101	14	1	1	259.158	0	87	680.351	683.376	651.96	603.529	565.887	616.034	654.327	658.051	685.583
792	35	1	4	50360207			0	2	1	35	35	2	2	3	35	5	5	1	1	2	1	1	503601	1	35	0	3	1	2	4	1	5036	503602	50360101	8	1	1	259.158	0	87	517.835	502.223	543.402	509.419	536.701	526.004	468.158	500.391	487.758
792	35	1	4	50360208			0	2	1	35	35	2	2	2	35	4	4	2	2	1	3	3	503601	1	35	0	3	1	2	4	1	5036	503602	50360101	15	1	1	259.158	0	87	587.288	579.521	536.532	559.584	575.365	591.464	596.524	649.913	561.065
792	35	1	4	50360209			0	1	1	35	35	1	1	3	35	5	5	1	1	1	1	2	503601	1	35	0	3	1	2	4	1	5036	503602	50360101	9	1	1	259.158	0	87	566.982	572.239	614.526	571.782	586.217	552.816	597.96	571.27	608.816
792	35	1	4	50360210			1	1	1	35	35	1	1	3	35	4	5	1	1	2	1	1	503601	1	35	0	3	1	2	4	1	5036	503602	50360101	16	1	1	259.158	0	87	677.317	651.835	667.337	557.166	637.931	610.055	614.589	566.531	701.7
792	35	1	4	50360211			0	2	1	35	35	2	1	3	35	4	5	1	1	2	1	1	503601	1	35	0	3	1	2	4	1	5036	503602	50360101	15	1	1	259.158	0	87	532.502	557.02	617.238	563.11	638.105	561.576	563.401	600.55	555.229
792	35	1	4	50360212			1	2	1	35	35	2	1	3	35	5	5	1	1	1	1	1	503601	1	35	0	3	1	2	4	1	5036	503602	50360101	1	1	1	259.158	0	87	586.566	598.107	616.611	613.071	601.471	554.921	584.161	531.848	628.16
792	35	1	4	50360213			0	1	1	35	35	1	1	2	35	3	5	2	1	1	3	1	503601	1	35	0	3	1	2	4	1	5036	503602	50360101	2	1	1	259.158	0	87	551.517	491.815	532.123	523.601	524.966	518.297	525.805	458.378	504.052
792	35	1	4	50360214			0	1	1	35	35	1	1	2	35	5	5	1	1	1	1	2	503601	1	35	0	3	1	2	4	1	5036	503602	50360101	3	1	1	259.158	0	87	601.888	627.49	596.728	643.84	633.928	611.803	613.464	630.95	659.535
792	35	1	4	50360215			0	2	2	35	35	2	1	3	35	5	5	2	1	1	9	4	503601	1	35	0	3	1	2	4	1	5036	503602	50360101	17	1	1	259.158	0	87	489.88	482.241	486.012	460.863	445.572	477.646	408.204	385.998	386.087
792	35	1	4	50360216			0	2	2	35	35	2	1	3	35	5	4	1	1	2	1	1	503601	1	35	0	3	1	2	4	1	5036	503602	50360101	18	1	1	259.158	0	87	633.909	662.855	558.844	592.984	612.984	635.467	575.183	645.207	593.386
792	35	1	4	50360218			0	1	2	35	35	1	2	2	35	4	5	2	1	1	3	2	503601	1	35	0	3	1	2	4	1	5036	503602	50360101	10	1	1	259.158	0	87	597.993	663.044	591.653	652.536	676.105	670.363	674.137	616.434	614.792
792	35	1	4	50360219			0	2	2	35	35	2	2	3	35	3	5	1	1	1	1	1	503601	1	35	0	3	1	2	4	1	5036	503602	50360101	11	1	1	259.158	0	87	636.778	609.768	675.723	688.189	659.497	604.662	632.523	575.541	643.956
792	35	1	4	50360220			0	1	2	35	35	1	2	3	35	4	4	2	1	1	1	3	503601	1	35	0	3	1	2	4	1	5036	503602	50360101	12	1	1	259.158	0	87	651.383	570.147	695.725	606.371	594.813	644.376	616.861	632.142	637.502
792	35	1	4	50360221			0	1	2	35	35	1	2	3	35	3	4	2	2	1	3	1	503601	1	35	0	3	1	2	4	1	5036	503602	50360101	4	1	1	259.158	0	87	622.901	625.134	621.179	639.884	638.11	641.195	697.961	642.878	656.674
792	35	1	4	50360222			1	1	2	35	35	1	2	2	35	5	5	1	1	2	2	1	503601	1	35	0	3	1	2	4	1	5036	503602	50360101	5	1	1	259.158	0	87	623.942	628.868	634.856	636.442	600.006	649.947	676.94	585.9	688.741
792	35	1	4	50360223			0	1	2	35	35	1	1	2	35	3	4	2	2	1	1	3	503601	1	35	0	3	1	2	4	1	5036	503602	50360101	6	1	1	259.158	0	87	566.137	537.708	530.505	528.916	576.809	542.209	536.655	554.169	532.201
792	35	1	4	50360224			1	2	2	35	35	2	1	3	35	3	5	1	1	2	1	1	503601	1	35	0	3	1	2	4	1	5036	503602	50360101	13	1	1	259.158	0	87	605.075	584.477	655.401	606.275	584.077	648.78	654.843	566.517	628.427
792	35	1	4	50360225			0	2	2	35	35	2	1	2	35	4	1	2	2	2	5	2	503601	1	35	0	3	1	2	4	1	5036	503602	50360101	7	1	1	259.158	0	87	468.502	482.201	541.105	492.79	473.176	452.475	489.86	486.717	435.717
792	35	1	4	50360226			1	1	2	35	35	1	1	3	35	5	5	1	1	1	1	2	503601	1	35	0	3	1	2	4	1	5036	503602	50360101	8	1	1	259.158	0	87	631.971	653.043	659.664	659.378	646.39	679.897	684.747	604.285	654.891
792	35	1	4	50360227			0	2	2	35	35	2	2	3	35	4	4	1	1	2	2	9	503601	1	35	0	3	1	2	4	1	5036	503602	50360101	9	1	1	259.158	0	87	500.19	479.545	491.667	498.83	447.929	483.368	524.971	496.086	493.302
792	35	1	4	50360228			0	2	2	35	35	2	2	3	35	3	3	2	2	1	3	3	503601	1	35	0	3	1	2	4	1	5036	503602	50360101	14	1	1	259.158	0	87	570.36	499.746	487.52	497.361	500.98	557.55	509.972	536.18	572.391
792	35	2	2	50370301			1	2	1	35	35	2	2	3	35	2	2	2	3	2	5	9	503701	1	35	0	3	1	2	4	1	5037	503703	50370101	2	1	1	129.94	1	70	337.31	326.329	254.652	286.804	347.595	310.691	228.321	329.329	364.655
792	35	2	2	50370302			0	1	1	35	35	1	1	2	35	3	3	2	2	3	5	2	503701	1	35	0	3	1	2	4	1	5037	503703	50370101	11	1	1	129.94	1	70	500.936	531.844	530.282	443.324	501.226	498.221	528.37	548.384	493.647
792	35	2	2	50370303			1	1	1	35	35	1	2	2	35	3	4	2	2	2	3	3	503701	1	35	0	3	1	2	4	1	5037	503703	50370101	3	1	1	129.94	1	70	476.868	501.045	467.322	489.179	531.628	571.515	494.211	513.578	476.675
792	35	2	2	50370304			0	2	1	35	35	2	1	2	35	9	9	9	9	9	9	9	503701	1	35	0	3	1	2	4	1	5037	503703	50370101	4	1	1	129.94	1	70	434.583	483.613	442.012	466.524	489.438	484.665	460.612	445.864	520.89
792	35	2	2	50370305			1	2	1	35	35	2	1	2	35	3	3	2	2	1	3	5	503701	1	35	0	3	1	2	4	1	5037	503703	50370101	12	1	1	129.94	1	70	487.758	497.629	506.793	442.877	449.087	462.718	472.446	502.785	464.951
792	35	2	2	50370306			1	1	1	35	35	1	2	3	35	2	3	2	3	2	5	4	503701	1	35	0	3	1	2	4	1	5037	503703	50370101	5	1	1	129.94	1	70	345.482	296.405	363.061	350.698	347.362	333.216	419.847	375.335	387.762
792	35	2	2	50370307			0	2	1	35	35	2	1	2	35	2	2	2	2	2	3	3	503701	1	35	0	3	1	2	4	1	5037	503703	50370101	13	1	1	129.94	1	70	573.449	613.095	530.078	590.426	557.55	585.721	638.992	595.869	562.19
792	35	2	2	50370308			0	1	1	35	35	1	3	1	35	2	2	3	3	1	5	9	503701	1	35	0	3	1	2	4	1	5037	503703	50370101	6	1	1	129.94	1	70	341.67	373.336	274.674	251.46	268.558	352.295	347.043	290.523	365.51
792	35	2	2	50370309			0	2	1	35	35	2	1	3	35	2	3	2	2	2	1	2	503701	1	35	0	3	1	2	4	1	5037	503703	50370101	7	1	1	129.94	1	70	586.038	601.783	629.174	640.316	573.31	612.754	559.687	605.076	575.859
792	35	2	2	50370310			1	1	1	35	35	1	2	1				9					503701	1	35	0	3	1	2	4	1	5037	503703	50370101	14	1	1	129.94	1	70	354.832	294.899	350.222	345.811	357.146	277.787	332.543	323.626	336.23
792	35	2	2	50370311			0	1	1	35	35	1	1	2				9					503701	1	35	0	3	1	2	4	1	5037	503703	50370101	15	1	1	129.94	1	70	481.27	448.231	496.307	478.739	423.556	439.247	452.977	493.411	424.955
792	35	2	2	50370312			1	1	1	35	35	1	3	2				9					503701	1	35	0	3	1	2	4	1	5037	503703	50370101	16	1	1	129.94	1	70	340.698	308.268	311.451	381.022	351.651	381.329	367.539	356.319	270.564
792	35	2	2	50370313			0	2	1	35	35	2	3	2	35	9	2	2	3	9	4	9	503701	1	35	0	3	1	2	4	1	5037	503703	50370101	8	1	1	129.94	1	70	344.201	356.851	365.078	422.691	334.938	406.771	378.633	339.817	390.13
792	35	2	2	50370314			1	1	1	35	35	1	9	3	35	3	5	2	2	1	3	4	503701	1	35	0	3	1	2	4	1	5037	503703	50370101	17	1	1	129.94	1	70	278.381	323.314	303.837	290.455	288.504	305.762	314.875	265.664	264.294
792	35	2	2	50370315			0	2	1	35	35	2	1	2	35	4	5	2	1	1	3	2	503701	1	35	0	3	1	2	4	1	5037	503703	50370101	9	1	1	129.94	1	70	646.594	623.41	625.508	625.72	583.024	607.471	607.984	583.882	600.046
792	35	2	2	50370316			0	2	1	35	35	2	1	2	35	5	4	2	2	1	5	4	503701	1	35	0	3	1	2	4	1	5037	503703	50370101	18	1	1	129.94	1	70	429.976	453.472	465.541	442.447	436.811	425.508	447.8	461.73	462.873
792	35	2	2	50370317			0	2	1	35	35	2	2	2	35	1	1	3	3	2	5	4	503701	1	35	0	3	1	2	4	1	5037	503703	50370101	1	1	1	129.94	1	70	523.734	560.779	569.355	559.559	531.291	550.788	530.502	517.967	552.18
792	35	2	2	50370318			1	1	1	35	35	1	1	3	35	4	3	2	2	2	4	2	503701	1	35	0	3	1	2	4	1	5037	503703	50370101	10	1	1	129.94	1	70	420.483	407.872	428.968	434.624	444.162	432.457	401.209	448.816	418.899
792	35	2	2	50370319			0	2	1	35	35	2	1	2	35	1	3	2	2	1	3	1	503701	1	35	0	3	1	2	4	1	5037	503703	50370101	2	1	1	129.94	1	70	509.255	514.463	546.711	494.907	516.442	542.463	509.657	553.6	529.764
792	35	2	2	50370320			0	1	1	35	35	1	2	2	35	2	2	2	3	2	4	4	503701	1	35	0	3	1	2	4	1	5037	503703	50370101	11	1	1	129.94	1	70	380.742	389.459	356.852	406.727	343.232	407.199	419.489	415.462	379.254
792	35	2	2	50370321			0	1	1	35	35	1	1	2	35	2	4	2	2	2	5	2	503701	1	35	0	3	1	2	4	1	5037	503703	50370101	12	1	1	129.94	1	70	406.333	412.67	404.343	423.081	388.538	423.666	441.854	438.939	422.654
792	35	2	2	50370322			0	1	1	35	35	1	1	3	35	3	3	2	2	1	3	4	503701	1	35	0	3	1	2	4	1	5037	503703	50370101	13	1	1	129.94	1	70	568.742	639.72	614.204	490.991	568.314	625.144	569.517	591.48	577.158
792	35	2	2	50370323			0	2	1	35	35	2	9	1	35	5	4	2	1	2	1	1	503701	1	35	0	3	1	2	4	1	5037	503703	50370101	3	1	1	129.94	1	70	382.593	361.083	380.601	445.118	418.464	394.917	428.127	343.982	374.701
792	35	2	2	50370324			0	1	1	35	35	1	9	2	35	2	3	2	3	2	4	4	503701	1	35	0	3	1	2	4	1	5037	503703	50370101	14	1	1	129.94	1	70	443.181	456.848	404.208	429.586	389.71	409.802	428.268	435.93	406.06
792	35	2	2	50370325			0	1	1	35	35	1	1	3				9					503701	1	35	0	3	1	2	4	1	5037	503703	50370101	4	1	1	129.94	1	70	581.357	483.184	507.032	522.575	489.716	525.739	514.836	566.7	528.635
792	35	2	2	50370326			0	1	1	35	35	1	2	2	35	1	3	2	2	2	4	2	503701	1	35	0	3	1	2	4	1	5037	503703	50370101	15	1	1	129.94	1	70	536.61	440.442	447.446	465.241	438.199	470.555	495.557	450.868	474.02
792	35	2	2	50370327			0	2	1	35	35	2	2	2	35	1	5	2	2	2	9	3	503701	1	35	0	3	1	2	4	1	5037	503703	50370101	5	1	1	129.94	1	70	498.223	479.728	527.501	520.951	467.23	472.338	512.793	480.296	477.925
792	35	2	2	50370328			1	2	1	35	35	2	1	3	35	2	3	2	3	1	5	5	503701	1	35	0	3	1	2	4	1	5037	503703	50370101	6	1	1	129.94	1	70	567.148	612.582	638.611	615.988	582.972	552.236	582.186	582.36	632.902
792	35	2	2	50370330			0	1	1	35	35	1	1	3	35	3	3	2	2	2	4	3	503701	1	35	0	3	1	2	4	1	5037	503703	50370101	7	1	1	129.94	1	70	501.061	477.87	463.504	492.632	470.42	508.983	510.137	509.949	509.085
792	35	2	2	50370331			0	2	1	35	35	2	2	2	35	2	2	3	3	3	5	6	503701	1	35	0	3	1	2	4	1	5037	503703	50370101	17	1	1	129.94	1	70	398.635	463.728	403.702	421.126	381.732	421.73	448.265	457.802	391.022
792	35	2	2	50370332			0	2	1	35	35	2	1	2	35	3	2	2	2	2	2	2	503701	1	35	0	3	1	2	4	1	5037	503703	50370101	18	1	1	129.94	1	70	513.201	434.075	471.408	412.916	479.601	459.132	449.231	448.691	443.371
792	35	2	2	50370333			0	1	1	35	35	1	1	3	35	1	1	3	3	2	5	6	503701	1	35	0	3	1	2	4	1	5037	503703	50370101	8	1	1	129.94	1	70	557.563	523.476	568.398	534.59	508.68	518.447	530.108	568.424	523.836
792	35	2	2	50370801			0	1	1	35	35	1	1	2				9					503702	2	35	0	3	1	2	4	1	5037	503708	50370202	2	1	1	127.288	1	70	457.449	464.494	411.637	440.076	484.846	494.147	468.403	507.937	522.362
792	35	2	2	50370802			1	1	1	35	35	1	1	3	35	1	3	2	3	1	5	4	503702	2	35	0	3	1	2	4	1	5037	503708	50370202	3	1	1	127.288	1	70	444.678	381.18	443.866	464.763	443.102	432.747	422.329	500.98	437.189
792	35	2	2	50370803			0	1	1	35	35	1	1	3	35	4	5	2	2	1	4	4	503702	2	35	0	3	1	2	4	1	5037	503708	50370202	10	1	1	127.288	1	70	492.288	567.913	548.362	629.755	539.465	533.576	544.018	560.213	544.188
792	35	2	2	50370804			0	2	1	35	35	2	2	2	35	2	3	2	2	3	3	4	503702	2	35	0	3	1	2	4	1	5037	503708	50370202	4	1	1	127.288	1	70	528.853	472.06	506.296	504.214	447.385	511.806	474.995	479.894	568.766
792	35	2	2	50370805			1	1	1	35	35	1	2	3				9					503702	2	35	0	3	1	2	4	1	5037	503708	50370202	5	1	1	127.288	1	70	526.017	488.915	488.59	486.792	526.396	462.595	431.409	526.085	458.661
792	35	2	2	50370806			0	2	1	35	35	2	2	3	35	3	2	2	2	1	3	2	503702	2	35	0	3	1	2	4	1	5037	503708	50370202	6	1	1	127.288	1	70	450.02	430.919	430.433	425.124	416.132	446.137	447.83	410.031	437.527
792	35	2	2	50370807			1	2	1	35	35	2	2	1	35	9	9	9	9	9	9	9	503702	2	35	0	3	1	2	4	1	5037	503708	50370202	7	1	1	127.288	1	70	546.463	533.584	524.175	561.958	544.439	535.9	495.733	527.016	510.141
792	35	2	2	50370808			1	1	1	35	35	1	1	3	35	3	5	2	2	2	4	5	503702	2	35	0	3	1	2	4	1	5037	503708	50370202	11	1	1	127.288	1	70	445.495	477.695	511.983	498.097	467.647	484.829	479.723	507.792	464.329
792	35	2	2	50370809			0	1	1	35	35	1	2	1				9					503702	2	35	0	3	1	2	4	1	5037	503708	50370202	8	1	1	127.288	1	70	340.071	339.948	382.783	359.421	363.857	294.25	338.904	307.238	245.825
792	35	2	2	50370810			0	1	1	35	35	1	1	3	35	3	2	2	2	2	5	2	503702	2	35	0	3	1	2	4	1	5037	503708	50370202	12	1	1	127.288	1	70	518.352	534.14	517.217	494.962	537.678	502.65	495.852	476.892	517.443
792	35	2	2	50370812			0	2	1	35	35	2	2	3	35	3	4	2	2	2	5	6	503702	2	35	0	3	1	2	4	1	5037	503708	50370202	9	1	1	127.288	1	70	313.351	279.519	177.116	283.675	234.873	313.98	199.403	334.2	242.324
792	35	2	2	50370813			0	2	1	35	35	2	1	2				9					503702	2	35	0	3	1	2	4	1	5037	503708	50370202	14	1	1	127.288	1	70	466.973	518.726	471.384	456.381	481.651	478.023	481.756	427.55	455.931
792	35	2	2	50370814			0	1	1	35	35	1	1	2	35	1	2	2	3	3	3	4	503702	2	35	0	3	1	2	4	1	5037	503708	50370202	15	1	1	127.288	1	70	444.767	438.806	522.435	429.783	454.222	548.063	507.337	365.718	496.58
792	35	2	2	50370815			0	1	1	35	35	1	1	3	35	3	3	2	3	1	5	5	503702	2	35	0	3	1	2	4	1	5037	503708	50370202	16	1	1	127.288	1	70	596.228	611.885	572.76	503.89	639.645	570.08	567.524	561.487	592.968
792	35	2	2	50370817			0	1	1	35	35	1	2	1	35	2	2	2	3	3	4	3	503702	2	35	0	3	1	2	4	1	5037	503708	50370202	17	1	1	127.288	1	70	321.729	288.729	323.896	296.975	353.398	307.631	308.353	336.759	348.524
792	35	2	2	50370818			1	1	2	35	35	1	2	2	35	3	2	3	3	3	5	4	503702	2	35	0	3	1	2	4	1	5037	503708	50370202	2	1	1	127.288	1	70	503.357	525.545	500.444	489.272	503.187	496.417	445.399	452.001	466.001
792	35	2	2	50370820			0	2	2	35	35	2	1	2	35	5	4	2	1	3	1	1	503702	2	35	0	3	1	2	4	1	5037	503708	50370202	10	1	1	127.288	1	70	605.426	559.238	627.441	579.151	525.64	548.021	585.257	568.06	504.537
792	35	2	2	50370821			0	1	2	35	35	1	1	2	35	1	1	3	3	1	4	6	503702	2	35	0	3	1	2	4	1	5037	503708	50370202	3	1	1	127.288	1	70	574.176	533.653	603.724	565.266	570.426	552.202	583.475	623.223	613.632
792	35	2	2	50370822			0	2	2	35	35	2	1	3	35	5	5	2	2	1	3	6	503702	2	35	0	3	1	2	4	1	5037	503708	50370202	4	1	1	127.288	1	70	601.365	569.836	622.483	599.506	554.428	642.583	577.857	628.568	592.786
792	35	2	2	50370823			0	2	2	35	35	2	2	3	35	3	3	2	2	1	5	7	503702	2	35	0	3	1	2	4	1	5037	503708	50370202	5	1	1	127.288	1	70	402.1	310.71	297.484	374.031	391.05	260.846	414.407	320.952	284.198
792	35	2	2	50370825			1	1	2	35	35	1	1	3	35	1	1	2	3	2	3	4	503702	2	35	0	3	1	2	4	1	5037	503708	50370202	12	1	1	127.288	1	70	372.128	382.763	322.595	360.074	339.171	332.677	361.631	376.311	337.072
792	35	2	2	50370826			0	1	2	35	35	1	1	2	35	4	2	3	3	3	5	6	503702	2	35	0	3	1	2	4	1	5037	503708	50370202	6	1	1	127.288	1	70	422.169	455.986	476.742	411.564	486.615	507.788	421.345	419.169	453.018
792	35	2	2	50370827			0	2	2	35	35	2	1	3	35	3	4	2	2	2	5	4	503702	2	35	0	3	1	2	4	1	5037	503708	50370202	13	1	1	127.288	1	70	593.868	559.369	558.417	609.769	579.227	518.225	533.107	522.256	558.663
792	35	2	2	50370828			1	2	2	35	35	2	1	3	35	4	4	2	2	1	3	4	503702	2	35	0	3	1	2	4	1	5037	503708	50370202	14	1	1	127.288	1	70	540.429	550.493	504.856	521.431	545.156	525.459	512.214	565.388	522.999
792	35	2	2	50370829			0	2	2	35	35	2	1	2				9					503702	2	35	0	3	1	2	4	1	5037	503708	50370202	7	1	1	127.288	1	70	526.885	491.402	522.389	504.735	494.077	506.999	529.265	527.696	540.746
792	35	2	2	50370830			1	2	2	35	35	2	2	3	35	1	3	2	2	2	2	1	503702	2	35	0	3	1	2	4	1	5037	503708	50370202	8	1	1	127.288	1	70	444.584	470.733	506.95	508.759	478.865	422.082	492.719	387.062	453.631
792	35	2	2	50370834			0	2	2	35	35	2	1	2	35	4	2	2	2	2	2	4	503702	2	35	0	3	1	2	4	1	5037	503708	50370202	17	1	1	127.288	1	70	429.006	419.605	457.239	420.816	379.313	424.738	334.428	425.404	392.071
792	35	2	2	50370835			0	1	2	35	35	1	1	3	35	5	3	2	2	1	3	4	503702	2	35	0	3	1	2	4	1	5037	503708	50370202	1	1	1	127.288	1	70	504.21	496.775	541.52	526.818	495.084	543.364	500.061	503.988	538.784
792	35	4	1	50380402			0	1	2	35	35	1	1	2	35	1	1	3	3	3	5	4	503801	1	35	0	2	1	2	4	1	5038	503804	50380101	11	1	1	134.497	1	31	427.401	502.762	485.508	512.738	477.98	466.257	482.789	504.22	514.714
792	35	4	1	50380403			1	1	2	35	35	1	1	3	35	1	1	2	3	3	5	4	503801	1	35	0	2	1	2	4	1	5038	503804	50380101	4	1	1	134.497	1	31	492.767	493.422	526.914	477.035	486.524	477.542	448.434	530.353	540.247
792	35	4	1	50380404			0	2	2	35	35	2	2	2	35	2	1	3	3	2	3	4	503801	1	35	0	2	1	2	4	1	5038	503804	50380101	5	1	1	134.497	1	31	456.131	461.028	490.772	439.597	418.259	389.226	411.683	477.992	434.762
792	35	4	1	50380405			1	1	2	35	35	1	2	9	35	2	2	2	3	3	4	4	503801	1	35	0	2	1	2	4	1	5038	503804	50380101	12	1	1	134.497	1	31	378.94	315.976	303.963	364.733	325.483	318.64	359.888	288.989	346.783
792	35	4	1	50380406			0	2	2	35	35	2	1	3	35	3	2	2	2	2	4	2	503801	1	35	0	2	1	2	4	1	5038	503804	50380101	13	1	1	134.497	1	31	407.271	409.63	432.292	426.949	424.192	484.31	471.676	459.778	397.055
792	35	4	1	50380407			1	2	2	35	35	2	2	2	35	1	1	3	3	2	5	4	503801	1	35	0	2	1	2	4	1	5038	503804	50380101	14	1	1	134.497	1	31	334.513	266.856	329.455	305.011	338.192	351.289	346.943	323.02	309.467
792	35	4	1	50380408			0	2	2	35	35	2	2	3	35	1	1	2	3	2	3	2	503801	1	35	0	2	1	2	4	1	5038	503804	50380101	6	1	1	134.497	1	31	375.781	414.335	354.331	376.903	326.496	389.979	316.798	330.487	295.617
792	35	4	1	50380409			0	2	2	35	35	2	1	2	35	2	1	2	3	2	4	4	503801	1	35	0	2	1	2	4	1	5038	503804	50380101	15	1	1	134.497	1	31	387.017	372.649	378.862	393.919	377.818	364.254	482.397	372.362	395.747
792	35	4	1	50380410			0	2	2	35	35	2	2	1	35	1	1	3	3	2	4	4	503801	1	35	0	2	1	2	4	1	5038	503804	50380101	16	1	1	134.497	1	31	324.539	363.205	322.217	344.643	308.135	372.048	273.123	297.843	327.786
792	35	4	1	50380411			0	1	2	35	35	1	1	2	35	1	1	2	3	2	4	2	503801	1	35	0	2	1	2	4	1	5038	503804	50380101	17	1	1	134.497	1	31	383.808	398.144	371.363	377.587	348.194	378.698	326.342	340.473	372.875
792	35	4	1	50380412			1	2	2	35	35	2	2	2	35	9	9	9	9	9	9	9	503801	1	35	0	2	1	2	4	1	5038	503804	50380101	18	1	1	134.497	1	31	568.605	562.939	536.202	594.728	581.701	566.233	589.827	499.166	578.717
792	35	4	1	50380414			0	1	2	35	35	1	1	2	35	9	9	9	9	9	9	4	503801	1	35	0	2	1	2	4	1	5038	503804	50380101	11	1	1	134.497	1	31	419.837	403.117	445.577	427.716	390.464	438.009	442.799	435.755	425.085
792	35	4	1	50380415			0	1	2	35	35	1	1	3	35	1	1	3	3	2	5	4	503801	1	35	0	2	1	2	4	1	5038	503804	50380101	12	1	1	134.497	1	31	335.621	351.105	412.245	330.561	316.847	395.366	362.209	400.431	389.226
792	35	4	1	50380418			1	1	2	35	35	1	1	2	35	1	1	2	3	2	6	4	503801	1	35	0	2	1	2	4	1	5038	503804	50380101	9	1	1	134.497	1	31	466.044	439.746	455.439	427.17	455.338	434.476	486.023	467.158	425.848
792	35	4	1	50380419			0	1	2	35	35	1	1	1	35	1	1	3	3	2	4	4	503801	1	35	0	2	1	2	4	1	5038	503804	50380101	1	1	1	134.497	1	31	363.786	437.824	376.819	386.7	377.024	374.306	319.66	375.219	351.669
792	35	4	1	50380420			0	2	2	35	35	2	2	3	35	9	9	9	9	2	9	9	503801	1	35	0	2	1	2	4	1	5038	503804	50380101	2	1	1	134.497	1	31	353.024	297.903	329.512	326.563	316.031	345.502	288.332	297.554	400.838
792	35	4	1	50380421			0	2	2	35	35	2	2	2	35	9	9	9	9	9	9	9	503801	1	35	0	2	1	2	4	1	5038	503804	50380101	13	1	1	134.497	1	31	368.555	388.943	404.008	346.907	360.905	399.837	369.408	295.73	309.384
792	35	4	1	50380425			1	1	2	35	35	1	1	1	35	2	2	3	3	2	4	4	503801	1	35	0	2	1	2	4	1	5038	503804	50380101	6	1	1	134.497	1	31	348.449	355.591	328.806	339.686	359.296	247.871	414.607	361.812	274.464
792	35	4	1	50380426			0	1	2	35	35	1	2	2	35	9	9	9	9	2	9	9	503801	1	35	0	2	1	2	4	1	5038	503804	50380101	7	1	1	134.497	1	31	430.26	484.749	466.081	431.012	460.124	438.997	465.689	462.912	474.994
792	35	4	1	50380427			0	2	2	35	35	2	3	1	35	1	9	9	9	9	9	9	503801	1	35	0	2	1	2	4	1	5038	503804	50380101	14	1	1	134.497	1	31	269.408	292.412	245.306	236.794	346.749	252.674	259.491	292.122	304.93
792	35	4	1	50380428			0	2	2	35	35	2	2	2	35	1	1	2	3	2	3	4	503801	1	35	0	2	1	2	4	1	5038	503804	50380101	15	1	1	134.497	1	31	282.395	210.648	227.493	232.177	207.343	187.098	109.199	190.679	297.679
792	35	4	1	50380429			1	1	2	35	35	1	1	2	35	1	1	3	3	2	4	4	503801	1	35	0	2	1	2	4	1	5038	503804	50380101	16	1	1	134.497	1	31	427.418	472.992	498.888	460.212	485.136	414.791	444.997	457.031	406.58
792	35	4	1	50380430			0	2	2	35	35	2	1	1	35	1	1	2	3	3	3	2	503801	1	35	0	2	1	2	4	1	5038	503804	50380101	8	1	1	134.497	1	31	347.862	336.29	317.695	366.063	307.203	360.792	316.732	359.462	399.037
792	35	4	1	50380431			0	2	2	35	35	2	1	2	35	1	1	3	3	2	5	5	503801	1	35	0	2	1	2	4	1	5038	503804	50380101	9	1	1	134.497	1	31	448.683	366.507	416.849	437.1	467.307	416.171	399.949	495.417	410.789
792	35	4	1	50380433			0	2	2	35	35	2	1	2				9					503801	1	35	0	2	1	2	4	1	5038	503804	50380101	2	1	1	134.497	1	31	459.108	496.054	478.941	431.602	469.132	500.587	491.031	498.848	473.553
792	35	4	1	50380802			0	2	1	35	35	2	1	3	35	1	1	2	3	2	5	3	503802	2	35	0	3	1	2	4	1	5038	503808	50380202	1	1	1	193.987	1	31	526.712	541.416	491.555	488.693	547.035	511.993	519.712	498.142	542.185
792	35	4	1	50380803			0	1	1	35	35	1	1	3	35	1	1	2	3	2	5	4	503802	2	35	0	3	1	2	4	1	5038	503808	50380202	18	1	1	193.987	1	31	472.239	471.007	529.126	533.678	476.588	545.423	560.654	558.715	547.565
792	35	4	1	50380804			0	1	1	35	35	1	1	1	35	1	1	3	3	2	5	6	503802	2	35	0	3	1	2	4	1	5038	503808	50380202	2	1	1	193.987	1	31	525.016	509.363	509.596	453.362	508.229	562.867	554.69	532.269	544.84
792	35	4	1	50380805			0	1	1	35	35	1	1	1	35	1	1	3	3	2	5	4	503802	2	35	0	3	1	2	4	1	5038	503808	50380202	3	1	1	193.987	1	31	484.771	494.17	445.165	482.609	436.027	453.811	442.282	468.527	447.65
792	35	4	1	50380812			0	1	1	35	35	1	1	1	35	1	1	3	3	2	5	2	503802	2	35	0	3	1	2	4	1	5038	503808	50380202	8	1	1	193.987	1	31	454.207	477.512	471.865	454.024	432.492	478.818	468.341	463.83	454.039
792	35	4	1	50380814			1	2	1	35	35	2	2	1	35	1	1	3	3	2	5	4	503802	2	35	0	3	1	2	4	1	5038	503808	50380202	12	1	1	193.987	1	31	418.375	409.762	429.336	439.549	456.888	394.315	446.182	498.465	484.571
792	35	4	1	50380815			0	1	1	35	35	1	2	1	35	1	1	3	3	2	5	2	503802	2	35	0	3	1	2	4	1	5038	503808	50380202	13	1	1	193.987	1	31	540.868	526.439	489.931	493.974	534.691	560.602	525.724	574.721	528.812
792	35	4	1	50380816			0	1	1	35	35	1	3	2	35	1	1	2	3	2	5	2	503802	2	35	0	3	1	2	4	1	5038	503808	50380202	14	1	1	193.987	1	31	472.092	472.431	458.988	439.99	387.516	496.615	412.209	450.357	473.948
792	35	4	1	50380819			0	1	1	35	35	1	3	2	35	1	1	2	3	2	5	3	503802	2	35	0	3	1	2	4	1	5038	503808	50380202	17	1	1	193.987	1	31	409.144	417.555	406.022	434.565	423.452	403.344	475.387	378.672	439.356
792	35	4	1	50380821			0	1	1	35	35	1	2	2	35	1	1	3	3	2	5	3	503802	2	35	0	3	1	2	4	1	5038	503808	50380202	1	1	1	193.987	1	31	339.886	344.961	369.705	395.56	323.92	281.439	314.973	297.848	294.211
792	35	4	1	50380825			0	1	1	35	35	1	2	2	35	1	1	3	3	2	4	4	503802	2	35	0	3	1	2	4	1	5038	503808	50380202	3	1	1	193.987	1	31	326.318	386.73	311.388	351.461	393.486	371.602	349.202	405.277	334.057
792	35	4	1	50380827			0	1	1	35	35	1	2	3	35	1	1	3	3	2	5	4	503802	2	35	0	3	1	2	4	1	5038	503808	50380202	5	1	1	193.987	1	31	406.063	392.059	382.371	407.742	354.27	446.315	336.917	312.222	424.255
792	35	4	1	50380828			0	2	1	35	35	2	1	1	35	1	1	3	3	2	4	4	503802	2	35	0	3	1	2	4	1	5038	503808	50380202	12	1	1	193.987	1	31	509.755	505.262	543.081	545.747	477.183	540.172	547.367	572.614	503.112
792	35	4	1	50380829			0	2	1	35	35	2	2	3	35	1	1	3	3	2	5	4	503802	2	35	0	3	1	2	4	1	5038	503808	50380202	6	1	1	193.987	1	31	404.744	506.549	414.932	440.826	457.198	389.883	437.283	491.253	447.085
792	35	4	1	50380830			0	1	1	35	35	1	2	1	35	1	1	3	3	2	5	4	503802	2	35	0	3	1	2	4	1	5038	503808	50380202	7	1	1	193.987	1	31	417.049	429.93	415.085	463.194	381.271	470.708	483.938	448.354	444.943
792	35	4	1	50380832			0	2	1	35	35	2	2	2				9					503802	2	35	0	3	1	2	4	1	5038	503808	50380202	14	1	1	193.987	1	31	420.226	396.282	406.677	430.248	417.142	405.698	409.829	419.778	440.45
792	35	2	4	50390301			0	1	1	35	35	1	2	3	35	4	4	2	1	2	2	1	503901	1	35	0	2	1	2	4	1	5039	503903	50390101	13	1	1	440.889	1	47	560.299	529.508	577.959	579.112	558.886	600.276	523.22	501.546	559.676
792	35	2	4	50390302			0	2	1	35	35	2	2	2	35	4	5	2	1	2	2	1	503901	1	35	0	2	1	2	4	1	5039	503903	50390101	14	1	1	440.889	1	47	576.613	595.3	594.004	584.712	565.024	613.784	599.963	632.975	626.334
792	35	2	4	50390303			1	1	1	35	35	1	2	3	35	3	5	2	2	2	3	5	503901	1	35	0	2	1	2	4	1	5039	503903	50390101	15	1	1	440.889	1	47	391.303	404.512	447.132	412.15	459.613	390.436	423.469	471.359	402.736
792	35	2	4	50390304			0	2	1	35	35	2	3	3	35	3	3	2	2	1	1	3	503901	1	35	0	2	1	2	4	1	5039	503903	50390101	5	1	1	440.889	1	47	365.151	385.605	405.642	332.419	397.329	368.278	381.363	413.127	409.769
792	35	2	4	50390305			1	1	1	35	35	1	2	3	35	4	3	2	2	1	3	3	503901	1	35	0	2	1	2	4	1	5039	503903	50390101	6	1	1	440.889	1	47	483.974	553.153	506.539	496.435	515.817	496.728	565.146	505.842	499.033
792	35	2	4	50390306			0	2	1	35	35	2	2	2	35	3	5	2	1	2	2	2	503901	1	35	0	2	1	2	4	1	5039	503903	50390101	16	1	1	440.889	1	47	562.358	556.749	602.838	506.708	557.68	598.834	579.921	574.678	586.936
792	35	2	4	50390307			0	1	1	35	35	1	2	2	35	3	2	2	2	2	2	3	503901	1	35	0	2	1	2	4	1	5039	503903	50390101	17	1	1	440.889	1	47	550.108	569.18	502.854	478.346	604.699	538.842	510.411	556.337	520.63
792	35	2	4	50390308			1	2	1	35	35	2	3	2	35	1	1	2	3	2	3	5	503901	1	35	0	2	1	2	4	1	5039	503903	50390101	18	1	1	440.889	1	47	395.086	402.763	419.683	437.758	423.917	471.145	408.842	436.06	371.189
792	35	2	4	50390309			0	2	1	35	35	2	3	2	35	4	3	2	2	1	5	1	503901	1	35	0	2	1	2	4	1	5039	503903	50390101	7	1	1	440.889	1	47	561.255	528.207	559.839	494.613	525.815	542.101	519.71	484.205	572.788
792	35	2	4	50390310			1	2	1	35	35	2	2	2	35	3	2	3	3	2	5	5	503901	1	35	0	2	1	2	4	1	5039	503903	50390101	8	1	1	440.889	1	47	403.673	446.489	426.686	387.84	385.766	457.829	350.803	388.72	427.502
792	35	2	4	50390312			0	1	1	35	35	1	2	2	35	5	5	2	1	1	1	1	503901	1	35	0	2	1	2	4	1	5039	503903	50390101	9	1	1	440.889	1	47	593.344	597.276	565.767	583.207	590.464	620.601	613.677	541.472	573.753
792	35	2	4	50390313			1	1	1	35	35	1	3	3	35	2	3	2	2	3	1	1	503901	1	35	0	2	1	2	4	1	5039	503903	50390101	1	1	1	440.889	1	47	556.731	523.957	530.04	547.488	568.358	535.208	577.877	542.983	544.226
792	35	2	4	50390314			0	2	1	35	35	2	2	3	35	2	2	2	3	2	3	5	503901	1	35	0	2	1	2	4	1	5039	503903	50390101	2	1	1	440.889	1	47	481.509	498.516	522.568	463.543	484.853	493.07	438.13	481.315	532.862
792	35	2	4	50390315			0	1	1	35	35	1	2	3	35	3	4	1	1	1	1	1	503901	1	35	0	2	1	2	4	1	5039	503903	50390101	11	1	1	440.889	1	47	680.637	608.235	652.939	728.618	662.875	686.869	671.759	625.862	688.394
792	35	2	4	50390316			1	1	1	35	35	1	2	3	35	3	4	2	2	1	1	3	503901	1	35	0	2	1	2	4	1	5039	503903	50390101	12	1	1	440.889	1	47	500.721	532.696	472.552	495.793	464.346	489.343	455.005	449.137	522.367
792	35	2	4	50390317			0	2	1	35	35	2	2	2	35	5	4	2	2	3	5	3	503901	1	35	0	2	1	2	4	1	5039	503903	50390101	3	1	1	440.889	1	47	440.774	438.914	444.677	457.357	455.621	439.236	446.307	484.787	421.257
792	35	2	4	50390318			1	1	1	35	35	1	1	2	35	5	5	1	1	2	1	1	503901	1	35	0	2	1	2	4	1	5039	503903	50390101	4	1	1	440.889	1	47	559.454	560.003	596.8	572.096	625.924	585.797	534.009	501.988	572
792	35	2	4	50390319			0	2	1	35	35	2	2	3	35	3	2	2	3	2	4	4	503901	1	35	0	2	1	2	4	1	5039	503903	50390101	5	1	1	440.889	1	47	428.22	438.237	443.269	454.037	422.474	492.313	420.815	404.482	443.966
792	35	1	4	50400302			0	1	1	35	35	1	1	3	35	9	2	2	2	2	3	3	504001	1	35	0	3	1	2	4	1	5040	504003	50400101	8	1	1	300.206	1	63	552.177	578.065	555.039	553.226	569.477	550.011	549.268	521.987	580.614
792	35	1	4	50400303			0	1	1	35	35	1	1	3	35	3	4	2	2	2	3	5	504001	1	35	0	3	1	2	4	1	5040	504003	50400101	12	1	1	300.206	1	63	438.888	453.908	453.52	467.372	449.233	458.576	419.985	404.029	441.613
792	35	1	4	50400304			1	2	1	35	35	2	2	2	35	3	4	2	2	2	4	5	504001	1	35	0	3	1	2	4	1	5040	504003	50400101	13	1	1	300.206	1	63	479.157	508.082	568.846	601.447	497.815	595.617	512.458	579.317	537.46
792	35	1	4	50400305			0	1	1	35	35	1	2	3	35	4	5	1	1	2	1	1	504001	1	35	0	3	1	2	4	1	5040	504003	50400101	9	1	1	300.206	1	63	643.383	629.914	623.886	613.362	619.717	610.73	594.968	595.547	654.641
792	35	1	4	50400306			0	2	1	35	35	2	2	3	35	1	1	2	3	2	2	5	504001	1	35	0	3	1	2	4	1	5040	504003	50400101	1	1	1	300.206	1	63	589.773	604.672	635.347	563.371	597.721	573.318	587.139	568.796	588.681
792	35	1	4	50400307			0	2	1	35	35	2	1	3	35	4	5	2	1	2	1	4	504001	1	35	0	3	1	2	4	1	5040	504003	50400101	14	1	1	300.206	1	63	659.63	580.323	631.865	636.716	613.435	661.171	600.84	654.978	531.908
792	35	1	4	50400308			0	1	1	35	35	1	2	2	35	3	4	2	2	1	3	3	504001	1	35	0	3	1	2	4	1	5040	504003	50400101	15	1	1	300.206	1	63	581.727	579.359	471.186	645.443	558.765	613.53	595.35	627.603	558.062
792	35	1	4	50400309			0	2	1	35	35	2	1	3	35	3	4	2	2	1	3	5	504001	1	35	0	3	1	2	4	1	5040	504003	50400101	2	1	1	300.206	1	63	560.777	534.778	501.776	538.586	520.093	518.44	548.445	509.183	516.744
792	35	1	4	50400310			0	1	1	35	35	1	1	3	35	4	4	2	2	2	3	4	504001	1	35	0	3	1	2	4	1	5040	504003	50400101	16	1	1	300.206	1	63	525.666	540.189	530.183	497.583	552.115	498.102	501.202	581.887	508.384
792	35	1	4	50400311			0	2	1	35	35	2	1	3	35	1	2	2	3	2	5	5	504001	1	35	0	3	1	2	4	1	5040	504003	50400101	3	1	1	300.206	1	63	478.806	524.155	522.435	498.296	474.916	471.37	502.967	488.506	456.702
792	35	1	4	50400312			0	2	1	35	35	2	1	2	35	5	4	2	1	2	1	4	504001	1	35	0	3	1	2	4	1	5040	504003	50400101	17	1	1	300.206	1	63	696.067	597.472	584.103	641.866	652.622	591.726	659.165	595.634	597.025
792	35	1	4	50400313			0	1	1	35	35	1	2	3	35	5	5	2	1	2	1	4	504001	1	35	0	3	1	2	4	1	5040	504003	50400101	4	1	1	300.206	1	63	619.818	607.76	661.168	582.215	639.563	615.182	600.064	542.075	553.758
792	35	1	4	50400314			0	1	1	35	35	1	1	3	35	5	5	1	1	1	1	1	504001	1	35	0	3	1	2	4	1	5040	504003	50400101	18	1	1	300.206	1	63	510.814	588.847	554.77	504.158	512.391	654.175	483.339	483.843	589.189
792	35	1	4	50400315			0	2	1	35	35	2	1	2	35	2	5	2	2	3	3	5	504001	1	35	0	3	1	2	4	1	5040	504003	50400101	5	1	1	300.206	1	63	544.165	548.974	585.998	604.765	571.988	611.232	583.236	590.634	601.839
792	35	1	4	50400316			1	1	1	35	35	1	1	3	35	4	5	2	2	1	3	5	504001	1	35	0	3	1	2	4	1	5040	504003	50400101	6	1	1	300.206	1	63	619.186	617.061	643.488	660.536	667.139	606.471	621.5	631.989	620.448
792	35	1	4	50400317			0	1	1	35	35	1	1	3	35	3	4	2	2	1	1	3	504001	1	35	0	3	1	2	4	1	5040	504003	50400101	7	1	1	300.206	1	63	573.118	653.961	558.727	595.157	582.985	566.23	601.109	589.266	604.124
792	35	1	4	50400318			0	2	1	35	35	2	2	3	35	3	3	2	1	2	1	1	504001	1	35	0	3	1	2	4	1	5040	504003	50400101	10	1	1	300.206	1	63	571.064	596.942	696.525	636.478	584.762	547.385	623.34	555.634	571.288
792	35	1	4	50400319			0	2	1	35	35	2	1	3	35	3	5	2	2	1	3	2	504001	1	35	0	3	1	2	4	1	5040	504003	50400101	8	1	1	300.206	1	63	616.267	604.119	627.856	647.238	635.197	593.747	653.732	651.769	650.085
792	35	1	4	50400320			0	2	1	35	35	2	1	2	35	1	2	3	3	3	5	5	504001	1	35	0	3	1	2	4	1	5040	504003	50400101	11	1	1	300.206	1	63	490.508	457.157	488.312	452.91	494.594	427.207	468.623	461.644	463.78
792	35	1	4	50400321			1	1	1	35	35	1	1	3	35	3	4	2	2	3	3	3	504001	1	35	0	3	1	2	4	1	5040	504003	50400101	9	1	1	300.206	1	63	600.223	613.05	584.919	583.517	571.344	606.191	594.439	592.374	650.973
792	35	1	4	50400322			1	1	1	35	35	1	1	3	35	2	2	2	2	3	3	1	504001	1	35	0	3	1	2	4	1	5040	504003	50400101	12	1	1	300.206	1	63	519.414	489.624	455.769	546.013	528.259	536.732	511.007	503.818	543.246
792	35	1	4	50400323			1	1	1	35	35	1	1	2	35	3	5	2	2	2	3	3	504001	1	35	0	3	1	2	4	1	5040	504003	50400101	1	1	1	300.206	1	63	564.892	600.927	585.41	579.438	568.539	555.99	571.042	575.626	576.533
792	35	1	4	50400324			0	1	1	35	35	1	2	2	35	3	5	2	2	3	3	4	504001	1	35	0	3	1	2	4	1	5040	504003	50400101	2	1	1	300.206	1	63	562.179	618.536	625.508	595.193	596.255	592.405	613.88	589.279	579.403
792	35	1	4	50400325			1	1	1	35	35	1	1	3	35	3	5	1	1	2	1	1	504001	1	35	0	3	1	2	4	1	5040	504003	50400101	3	1	1	300.206	1	63	592.492	659.752	638.643	628.564	680.059	651.908	673.898	654.294	643.243
792	35	1	4	50400326			1	1	1	35	35	1	1	3	35	3	4	2	2	1	3	4	504001	1	35	0	3	1	2	4	1	5040	504003	50400101	4	1	1	300.206	1	63	599.55	584.181	639.666	612.354	611.914	680.528	580.673	645.701	596.596
792	35	1	4	50400327			0	1	1	35	35	1	2	3	35	3	4	1	1	1	1	1	504001	1	35	0	3	1	2	4	1	5040	504003	50400101	13	1	1	300.206	1	63	640.154	564.145	535.855	586.8	580.127	500.061	532.102	497.842	517.701
792	35	1	4	50400328			0	1	1	35	35	1	1	3	35	4	4	2	2	1	3	4	504001	1	35	0	3	1	2	4	1	5040	504003	50400101	14	1	1	300.206	1	63	589.69	521.779	621.57	615.958	603.836	571.581	622.797	557.738	619.372
792	35	1	4	50400329			1	2	1	35	35	2	2	3	35	5	5	1	1	2	1	1	504001	1	35	0	3	1	2	4	1	5040	504003	50400101	15	1	1	300.206	1	63	637.017	603.445	619.182	565.918	598.207	628.996	607.467	642.017	652.618
792	35	1	4	50400331			1	2	1	35	35	2	1	2	35	1	3	2	2	3	1	5	504001	1	35	0	3	1	2	4	1	5040	504003	50400101	17	1	1	300.206	1	63	543.343	486.41	508.015	532.63	467.867	630.702	537.927	571.385	571.104
792	35	4	3	50410201			1	1	1	35	35	1	3	2	35	1	1	3	3	3	4	6	504101	1	35	0	2	1	2	4	1	5041	504102	50410101	11	1	1	103.81	1	45	570.813	554.748	579.607	584.154	480.594	532.118	506.31	509.597	512.789
792	35	4	3	50410202			0	1	1	35	35	1	1	3	35	1	2	3	3	3	5	5	504101	1	35	0	2	1	2	4	1	5041	504102	50410101	7	1	1	103.81	1	45	571.999	552.253	587.314	533.935	541.646	631.167	531.311	599.738	560.393
792	35	4	3	50410203			0	2	1	35	35	2	1	2	35	2	1	3	3	2	5	4	504101	1	35	0	2	1	2	4	1	5041	504102	50410101	8	1	1	103.81	1	45	413.92	437.892	395.082	458.058	384.355	382.756	397.066	395.837	416.089
792	35	4	3	50410204			0	1	1	35	35	1	2	2	35	5	4	2	2	2	3	4	504101	1	35	0	2	1	2	4	1	5041	504102	50410101	9	1	1	103.81	1	45	599.169	600.23	589.656	603.898	580.107	529.601	585.499	574.722	540.576
792	35	4	3	50410206			1	2	1	35	35	2	2	3	35	1	3	2	3	2	5	7	504101	1	35	0	2	1	2	4	1	5041	504102	50410101	12	1	1	103.81	1	45	518.491	472.986	487.523	503.739	496.479	503.099	548.748	486.563	483.769
792	35	4	3	50410209			0	1	1	35	35	1	1	2	35	3	4	2	2	2	3	4	504101	1	35	0	2	1	2	4	1	5041	504102	50410101	14	1	1	103.81	1	45	479.879	475.746	454.303	472.556	440.502	471.93	483.3	475.012	476.161
792	35	4	3	50410210			0	2	1	35	35	2	1	3	35	3	4	2	2	1	4	2	504101	1	35	0	2	1	2	4	1	5041	504102	50410101	2	1	1	103.81	1	45	557.12	561.42	556.731	550.612	560.099	579.959	596.573	483.116	555.754
792	35	4	3	50410211			1	1	1	35	35	1	1	2	35	1	2	2	3	2	4	3	504101	1	35	0	2	1	2	4	1	5041	504102	50410101	15	1	1	103.81	1	45	565.666	621.725	570.735	610.618	597.911	641.744	660.94	559.041	566.139
792	35	4	3	50410212			1	2	1	35	35	2	3	2	35	5	4	2	2	1	3	6	504101	1	35	0	2	1	2	4	1	5041	504102	50410101	16	1	1	103.81	1	45	530.818	466.001	527.58	513.449	505.773	554.611	544.77	497.418	591.742
792	35	4	3	50410213			1	1	1	35	35	1	1	3	35	9	4	2	2	2	4	9	504101	1	35	0	2	1	2	4	1	5041	504102	50410101	3	1	1	103.81	1	45	431.667	462.225	466.593	479.903	474.307	444.951	448.465	439.271	442.752
792	35	4	3	50410214			1	1	1	35	35	1	3	2	35	2	4	2	2	2	1	3	504101	1	35	0	2	1	2	4	1	5041	504102	50410101	4	1	1	103.81	1	45	502.517	452.368	469.05	479.015	465.492	477.199	450.503	484.275	458.052
792	35	4	3	50410215			0	1	1	35	35	1	1	3	35	4	3	2	2	1	3	2	504101	1	35	0	2	1	2	4	1	5041	504102	50410101	5	1	1	103.81	1	45	588.114	541.754	581.778	557.718	597.366	573.894	624.213	581.473	588.716
792	35	4	3	50410217			0	1	1	35	35	1	3	2	35	2	1	2	3	1	3	3	504101	1	35	0	2	1	2	4	1	5041	504102	50410101	6	1	1	103.81	1	45	537.611	512.134	563.605	500.572	530.198	524.663	547.151	572.021	524.712
792	35	4	3	50410218			0	2	1	35	35	2	1	3	35	3	3	2	2	2	4	4	504101	1	35	0	2	1	2	4	1	5041	504102	50410101	18	1	1	103.81	1	45	397.509	374.375	378.143	390.74	333.443	378.543	358.032	371.42	357.413
792	35	4	3	50410219			0	2	1	35	35	2	3	2	35	2	1	3	3	1	4	3	504101	1	35	0	2	1	2	4	1	5041	504102	50410101	10	1	1	103.81	1	45	581.261	553.745	582.328	535.367	575.726	558.882	538.933	552.374	536.48
792	35	4	3	50410220			0	1	1	35	35	1	2	3	35	3	3	2	2	1	4	2	504101	1	35	0	2	1	2	4	1	5041	504102	50410101	11	1	1	103.81	1	45	624.775	490.369	529.347	530.61	540.572	522.937	541.128	563.982	557.74
792	35	4	3	50410221			1	1	1	35	35	1	1	1	35	3	4	2	2	1	5	4	504101	1	35	0	2	1	2	4	1	5041	504102	50410101	7	1	1	103.81	1	45	430.039	448.721	488.088	467.776	480.387	481.345	449.729	464.047	523.188
792	35	4	3	50410222			0	2	1	35	35	2	3	2	35	2	3	2	2	2	3	4	504101	1	35	0	2	1	2	4	1	5041	504102	50410101	12	1	1	103.81	1	45	494.178	542.532	465.203	434.401	510.684	432.869	456.849	446.095	447.644
792	35	4	3	50410225			0	1	1	35	35	1	2	3	35	2	2	2	2	2	3	7	504101	1	35	0	2	1	2	4	1	5041	504102	50410101	14	1	1	103.81	1	45	480.73	503.887	479.126	471.68	460.59	473.005	504.182	468.898	470.581
792	35	4	3	50410226			0	1	1	35	35	1	2	3				9					504101	1	35	0	2	1	2	4	1	5041	504102	50410101	9	1	1	103.81	1	45	451.335	453.943	518.6	448.15	459.136	441.364	511.787	478.764	462.506
792	35	4	3	50410227			0	2	1	35	35	2	2	3	35	2	2	2	3	2	4	3	504101	1	35	0	2	1	2	4	1	5041	504102	50410101	15	1	1	103.81	1	45	587.827	545.857	493.609	595.483	531.642	582.511	479.739	478.742	558.025
792	35	4	3	50410228			0	1	1	35	35	1	2	2	35	3	2	2	2	2	2	3	504101	1	35	0	2	1	2	4	1	5041	504102	50410101	1	1	1	103.81	1	45	590.29	524.401	536.876	565.561	492.33	558.794	544.726	531.615	490.826
792	35	4	3	50410232			0	2	1	35	35	2	2	2	35	2	2	2	2	2	2	6	504101	1	35	0	2	1	2	4	1	5041	504102	50410101	16	1	1	103.81	1	45	349.739	393.345	423.412	405.564	355.723	401.944	354.276	408.295	343.014
792	35	4	3	50410234			1	1	1	35	35	1	2	1	35	2	2	2	3	1	4	4	504101	1	35	0	2	1	2	4	1	5041	504102	50410101	18	1	1	103.81	1	45	565.795	589.443	588.575	497.529	545.084	551.288	533.241	608.252	599.797
792	35	4	3	50410237			1	2	1	35	35	2	2	2	35	2	2	2	3	3	4	5	504101	1	35	0	2	1	2	4	1	5041	504102	50410101	6	1	1	103.81	1	45	470.087	475.325	486.503	434.86	476.32	431.149	436.428	469.731	445.919
792	35	4	3	50410238			0	1	1	35	35	1	2	3				9					504101	1	35	0	2	1	2	4	1	5041	504102	50410101	7	1	1	103.81	1	45	411.467	385.393	458.277	426.873	442.905	442.393	416.823	481.589	413.713
792	35	4	3	50410239			0	2	1	35	35	2	2	3	35	3	4	2	2	1	5	4	504101	1	35	0	2	1	2	4	1	5041	504102	50410101	11	1	1	103.81	1	45	502.334	491.929	489.547	417.291	459.112	499.386	465.152	489.643	511.625
792	35	4	3	50410240			0	2	1	35	35	2	2	2	35	3	3	2	2	2	5	1	504101	1	35	0	2	1	2	4	1	5041	504102	50410101	12	1	1	103.81	1	45	538.084	486.193	551.894	557.493	536.266	509.354	496.399	548.515	520.541
792	35	4	3	50410241			1	2	1	35	35	2	2	1	35	2	2	3	3	2	5	4	504101	1	35	0	2	1	2	4	1	5041	504102	50410101	8	1	1	103.81	1	45	463.64	469.213	453.127	410.761	477.076	455.162	494.558	491.838	479.764
792	35	4	3	50410242			0	2	1	35	35	2											504101	1	35	0	2	1	2	4	1	5041	504102	50410101	9	1	1	103.81	1	45	592.134	546.222	598.828	557.125	567.821	562.348	575.514	581.941	558.003
792	35	4	3	50410502			1	2	1	35	35	2	1	3	35	1	1	2	3	3	4	4	504102	2	35	0	2	1	2	4	1	5041	504105	50410202	13	1	1	91.9456	1	45	514.975	496.378	453.27	452.814	515.257	492.986	400.985	510.143	478.812
792	35	4	3	50410504			1	2	1	35	35	2	1	2	35	2	1	2	2	2	3	2	504102	2	35	0	2	1	2	4	1	5041	504105	50410202	2	1	1	91.9456	1	45	556.614	505.311	526.087	529.152	533.883	535.549	497.748	498.45	511.606
792	35	4	3	50410505			0	2	1	35	35	2	1	3	35	3	2	2	3	2	4	4	504102	2	35	0	2	1	2	4	1	5041	504105	50410202	3	1	1	91.9456	1	45	603.179	628.682	580.163	573.215	590.147	577.651	578.858	555.66	578.314
792	35	4	3	50410506			0	2	1	35	35	2	1	2	35	2	3	2	2	2	5	2	504102	2	35	0	2	1	2	4	1	5041	504105	50410202	14	1	1	91.9456	1	45	354.357	405.366	356.554	331.708	373.232	375.609	391.342	363.122	348.343
792	35	4	3	50410507			0	2	1	35	35	2	1	3	35	4	4	1	1	1	1	3	504102	2	35	0	2	1	2	4	1	5041	504105	50410202	15	1	1	91.9456	1	45	613.952	557.736	603.648	577.819	560.925	547.014	581.452	521.826	613.219
792	35	4	3	50410508			1	2	1	35	35	2	1	3	35	5	4	2	1	2	1	3	504102	2	35	0	2	1	2	4	1	5041	504105	50410202	16	1	1	91.9456	1	45	564.117	537.29	492.284	518.659	495.38	564.437	529.305	535.864	494.449
792	35	4	3	50410509			0	2	1	35	35	2	1	2	35	3	3	2	2	2	2	3	504102	2	35	0	2	1	2	4	1	5041	504105	50410202	17	1	1	91.9456	1	45	545.662	546.717	536.311	541.857	513.521	548.397	536.618	576.204	513.148
792	35	4	3	50410510			1	2	1	35	35	2	1	2	35	3	3	2	3	2	5	6	504102	2	35	0	2	1	2	4	1	5041	504105	50410202	4	1	1	91.9456	1	45	553.746	566.264	553.25	549.274	542.884	609.973	508.581	572.501	586.03
792	35	4	3	50410511			0	2	1	35	35	2	2	2	35	3	3	2	2	2	2	5	504102	2	35	0	2	1	2	4	1	5041	504105	50410202	5	1	1	91.9456	1	45	487.599	515.118	476.018	474.607	498.278	472.537	463.318	534.457	438.205
792	35	4	3	50410512			1	2	1	35	35	2	1	2	35	4	2	2	2	2	3	4	504102	2	35	0	2	1	2	4	1	5041	504105	50410202	6	1	1	91.9456	1	45	599.923	558.641	537.348	608.656	567.442	563.033	572.96	593.969	574.334
792	35	4	3	50410513			1	1	1	35	35	1	1	2	35	3	2	2	2	2	3	2	504102	2	35	0	2	1	2	4	1	5041	504105	50410202	7	1	1	91.9456	1	45	470.118	492.021	517.289	492.031	533.17	502.306	505.082	535.944	484.918
792	35	4	3	50410514			0	1	1	35	35	1	1	3	35	4	4	2	2	1	5	3	504102	2	35	0	2	1	2	4	1	5041	504105	50410202	8	1	1	91.9456	1	45	532.587	585.711	584.251	538.412	594.153	601.69	499.791	590.706	593.818
792	35	4	3	50410515			0	1	1	35	35	1	1	2	35	1	1	2	3	2	3	3	504102	2	35	0	2	1	2	4	1	5041	504105	50410202	9	1	1	91.9456	1	45	601.937	608.883	577.129	571.36	587.99	562.108	574.649	552.694	561.401
792	35	4	3	50410516			1	1	1	35	35	1	1	3	35	5	4	2	2	1	5	4	504102	2	35	0	2	1	2	4	1	5041	504105	50410202	18	1	1	91.9456	1	45	636.216	596.648	512.178	601.588	543.446	570.034	650.21	671.298	547.071
792	35	4	3	50410517			1	1	1	35	35	1	1	3	35	3	3	2	2	1	3	4	504102	2	35	0	2	1	2	4	1	5041	504105	50410202	1	1	1	91.9456	1	45	562.215	544.094	511.49	521.327	538.386	512.304	518.212	521.602	542.308
792	35	4	3	50410518			0	1	1	35	35	1	1	2	35	3	2	2	2	2	3	5	504102	2	35	0	2	1	2	4	1	5041	504105	50410202	2	1	1	91.9456	1	45	625.007	591.312	660.637	672.764	609.729	597.75	601.615	577.235	577.02
792	35	4	3	50410519			0	1	1	35	35	1	1	2	35	1	9	3	3	3	4	4	504102	2	35	0	2	1	2	4	1	5041	504105	50410202	3	1	1	91.9456	1	45	527.777	482.776	511.578	520.528	535.301	473.63	488.313	510.096	543.118
792	35	4	3	50410520			1	1	1	35	35	1	1	2	35	1	2	2	3	1	3	5	504102	2	35	0	2	1	2	4	1	5041	504105	50410202	10	1	1	91.9456	1	45	548.588	468.676	598.718	533.704	551.388	519.256	522.486	482.408	548.521
792	35	4	3	50410521			0	2	1	35	35	2	1	2	35	3	2	2	2	2	1	4	504102	2	35	0	2	1	2	4	1	5041	504105	50410202	11	1	1	91.9456	1	45	554.154	537.341	535.573	472.892	549.495	525.195	551.107	523.008	458.591
792	35	4	3	50410522			1	2	1	35	35	2	3	3	35	3	3	2	2	2	1	3	504102	2	35	0	2	1	2	4	1	5041	504105	50410202	12	1	1	91.9456	1	45	473.138	480.476	496.558	510.067	515.852	491.285	486.707	500.65	530.778
792	35	4	3	50410523			0	2	1	35	35	2	1	3	35	3	4	2	2	1	4	4	504102	2	35	0	2	1	2	4	1	5041	504105	50410202	13	1	1	91.9456	1	45	561.133	528.062	495.66	519.494	537.999	472.525	560.002	521.311	570.217
792	35	4	3	50410524			1	2	1	35	35	2	1	3	35	3	3	2	2	2	4	1	504102	2	35	0	2	1	2	4	1	5041	504105	50410202	14	1	1	91.9456	1	45	644.955	583.069	577.566	583.246	570.163	572.828	629.968	554.193	536.585
792	35	4	3	50410526			0	1	1	35	35	1	1	1	35	2	1	2	3	2	3	4	504102	2	35	0	2	1	2	4	1	5041	504105	50410202	5	1	1	91.9456	1	45	597.543	624.093	628.873	636.724	597.867	643.672	642.104	598.36	599.693
792	35	4	3	50410529			0	2	1	35	35	2	1	2	35	1	1	3	3	1	4	4	504102	2	35	0	2	1	2	4	1	5041	504105	50410202	6	1	1	91.9456	1	45	510.828	442.406	478.221	489.045	484.782	500.566	466.266	477.379	475.817
792	35	4	3	50410531			0	1	1	35	35	1	1	3	35	1	4	2	3	3	5	3	504102	2	35	0	2	1	2	4	1	5041	504105	50410202	17	1	1	91.9456	1	45	600.112	617.79	629.389	643.737	600.298	653.433	546.58	566.803	573.648
792	35	4	3	50410534			0	2	1	35	35	2	1	2	35	4	4	2	2	2	5	4	504102	2	35	0	2	1	2	4	1	5041	504105	50410202	8	1	1	91.9456	1	45	524.739	443.733	452.805	403.699	417.561	406.435	478.958	449.657	497.039
792	35	4	3	50410535			0	1	1	35	35	1	1	3	35	2	2	2	3	2	4	4	504102	2	35	0	2	1	2	4	1	5041	504105	50410202	18	1	1	91.9456	1	45	386.234	406.982	427.791	422.794	432.658	462.602	413.719	451.533	421.146
792	35	4	3	50410536			0	2	1	35	35	2	1	2	35	3	3	2	2	1	3	5	504102	2	35	0	2	1	2	4	1	5041	504105	50410202	10	1	1	91.9456	1	45	604.651	619.642	588.027	652.466	615.003	599.498	633.614	636.6	620.808
792	35	4	3	50410537			0	1	1	35	35	1	1	2	35	4	4	2	2	2	3	4	504102	2	35	0	2	1	2	4	1	5041	504105	50410202	11	1	1	91.9456	1	45	525.844	566.773	562.237	489.97	539.028	544.964	529.41	521.722	568.967
792	35	4	3	50410538			0	2	1	35	35	2	1	2	35	3	4	2	2	1	2	4	504102	2	35	0	2	1	2	4	1	5041	504105	50410202	12	1	1	91.9456	1	45	550.006	498.954	575.386	561.988	522.271	535.381	532.3	556.44	533.539
792	35	4	1	50420401			0	1	1	35	35	1	1	2	35	1	1	3	3	3	5	5	504201	1	35	0	2	1	2	4	1	5042	504204	50420101	10	1	1	325.415	0	91	427.433	427.761	457.914	404.97	427.681	443.105	433.01	487.046	402.416
792	35	4	1	50420402			0	1	1	35	35	1	1	9	35	1	1	3	3	3	5	5	504201	1	35	0	2	1	2	4	1	5042	504204	50420101	6	1	1	325.415	0	91	411.166	383.911	404.085	385.414	418.13	463.292	372.031	381.557	406.264
792	35	4	1	50420403			1	2	1	35	35	2	1	3	35	3	3	2	3	3	5	5	504201	1	35	0	2	1	2	4	1	5042	504204	50420101	7	1	1	325.415	0	91	299.248	292.104	289.747	327.733	328.115	341.062	341.482	219.863	194.489
792	35	4	1	50420404			1	1	1	35	35	1	1	2	35	3	3	2	2	2	2	5	504201	1	35	0	2	1	2	4	1	5042	504204	50420101	8	1	1	325.415	0	91	491.24	540.034	515.676	541.375	488.134	472.376	535.052	526.505	482.897
792	35	4	1	50420405			0	2	1	35	35	2	1	2	35	5	5	2	2	1	5	5	504201	1	35	0	2	1	2	4	1	5042	504204	50420101	9	1	1	325.415	0	91	565.299	531.376	543.641	531.288	533.44	529.199	496.48	524.44	603.885
792	35	4	1	50420406			0	1	1	35	35	1	1	2	35	3	4	2	2	2	3	5	504201	1	35	0	2	1	2	4	1	5042	504204	50420101	11	1	1	325.415	0	91	464.023	435.988	427.726	417.747	500.639	484.476	407.304	477.762	413.246
792	35	4	1	50420407			1	2	1	35	35	2	3	1	35	3	2	3	3	2	5	5	504201	1	35	0	2	1	2	4	1	5042	504204	50420101	1	1	1	325.415	0	91	209.034	126.61	265.963	215.119	211.898	223.538	255.161	300.433	195.011
792	35	4	1	50420408			1	1	1	35	35	1	1	2	35	2	2	2	3	2	5	5	504201	1	35	0	2	1	2	4	1	5042	504204	50420101	2	1	1	325.415	0	91	407.766	436.115	396.004	447.721	449.008	483.177	484.103	425.157	432.235
792	35	4	1	50420409			0	2	1	35	35	2	1	2	35	1	2	2	3	3	5	4	504201	1	35	0	2	1	2	4	1	5042	504204	50420101	3	1	1	325.415	0	91	349.144	354.187	353.438	338.174	416.577	369.442	320.216	339.734	304.828
792	35	4	1	50420410			0	1	1	35	35	1	1	3	35	2	2	2	3	2	5	3	504201	1	35	0	2	1	2	4	1	5042	504204	50420101	12	1	1	325.415	0	91	484.422	446.44	516.63	500.069	472.073	532.498	500.327	508	520.358
792	35	4	1	50420411			0	1	1	35	35	1	1	2	35	1	1	3	3	3	5	3	504201	1	35	0	2	1	2	4	1	5042	504204	50420101	4	1	1	325.415	0	91	492.19	507.752	518.847	475.946	495.983	511.933	525.501	495.633	478.074
792	35	4	1	50420412			1	2	1	35	35	2	1	3	35	3	3	2	2	2	4	3	504201	1	35	0	2	1	2	4	1	5042	504204	50420101	5	1	1	325.415	0	91	545.573	520.801	507.84	525.194	538.222	526.157	567.304	464.384	508.025
792	35	4	1	50420413			1	1	1	35	35	1	1	9	35	3	2	2	3	3	5	5	504201	1	35	0	2	1	2	4	1	5042	504204	50420101	13	1	1	325.415	0	91	381.266	459.086	436.909	398.091	407.931	403.12	382.7	436.793	425.89
792	35	4	1	50420414			1	1	1	35	35	1	3	2	35	3	3	2	3	2	5	5	504201	1	35	0	2	1	2	4	1	5042	504204	50420101	14	1	1	325.415	0	91	313.789	341.667	303.463	295.265	339.486	332.273	263.592	308.094	265.86
792	35	4	1	50420415			0	1	1	35	35	1	1	2	35	4	5	2	2	3	4	5	504201	1	35	0	2	1	2	4	1	5042	504204	50420101	6	1	1	325.415	0	91	449.033	475.082	462.872	425.806	358.46	428.493	416.256	460.496	431.438
792	35	4	1	50420416			0	2	1	35	35	2	1	2	35	2	2	3	3	1	5	5	504201	1	35	0	2	1	2	4	1	5042	504204	50420101	7	1	1	325.415	0	91	396.876	415.71	382.2	409.314	405.389	416.165	407.375	399.468	394.496
792	35	4	1	50420417			0	2	1	35	35	2	2	2	35	1	1	3	3	3	4	5	504201	1	35	0	2	1	2	4	1	5042	504204	50420101	8	1	1	325.415	0	91	372.086	276.281	280.237	328.885	316.591	362.209	342.426	271.435	241.685
792	35	4	1	50420418			0	2	1	35	35	2	1	3	35	2	2	2	3	2	3	5	504201	1	35	0	2	1	2	4	1	5042	504204	50420101	15	1	1	325.415	0	91	303.923	351.594	314.699	315.345	325.807	326.109	314.868	293.946	332.038
792	35	4	1	50420419			0	2	1	35	35	2	1	3	35	3	4	2	2	1	2	3	504201	1	35	0	2	1	2	4	1	5042	504204	50420101	16	1	1	325.415	0	91	432.231	446.535	403.08	420.901	435.398	433.527	441.51	496.058	485.382
792	35	4	1	50420420			1	1	1	35	35	1	1	2	35	2	2	2	3	1	5	5	504201	1	35	0	2	1	2	4	1	5042	504204	50420101	17	1	1	325.415	0	91	324.673	377.518	391.866	378.641	402.652	421.804	461.384	400.705	392.106
792	35	4	1	50420421			0	2	1	35	35	2	1	2	35	3	3	2	2	2	3	4	504201	1	35	0	2	1	2	4	1	5042	504204	50420101	18	1	1	325.415	0	91	506.013	522.396	518.809	513.501	580.929	486.673	509.144	587.235	477.234
792	35	4	1	50420422			0	1	1	35	35	1	2	2	35	1	3	2	3	3	5	4	504201	1	35	0	2	1	2	4	1	5042	504204	50420101	9	1	1	325.415	0	91	468.521	501.875	473.995	467.058	477.877	491.036	455.162	482.724	521.356
792	35	4	1	50420423			0	1	1	35	35	1	1	1	35	4	3	2	2	3	5	5	504201	1	35	0	2	1	2	4	1	5042	504204	50420101	10	1	1	325.415	0	91	584.457	578.415	544.805	535.658	584.402	583.904	498.503	546.608	522.123
792	35	4	1	50420424			1	2	1	35	35	2	1	1	35	2	2	2	3	3	4	3	504201	1	35	0	2	1	2	4	1	5042	504204	50420101	11	1	1	325.415	0	91	355.04	312.044	280.318	377.727	340.242	322.877	330.84	338.041	337.137
792	35	4	1	50420425			0	2	1	35	35	2	2	3	35	1	3	2	3	2	5	3	504201	1	35	0	2	1	2	4	1	5042	504204	50420101	12	1	1	325.415	0	91	319.659	336.041	340.035	321.012	354.038	355.44	313.779	353.726	376.469
792	35	4	1	50420427			0	2	1	35	35	2	2	2	35	2	3	2	3	2	5	5	504201	1	35	0	2	1	2	4	1	5042	504204	50420101	13	1	1	325.415	0	91	331.086	277.195	291.045	245.197	336.061	369.201	339.613	222.974	300.544
792	35	4	1	50420428			0	2	1	35	35	2	2	1	35	4	2	3	2	3	4	5	504201	1	35	0	2	1	2	4	1	5042	504204	50420101	1	1	1	325.415	0	91	361.229	278.736	299.133	298.214	299.866	274.944	331.006	326.842	312.914
792	35	4	1	50420429			0	2	1	35	35	2	1	1	35	4	3	2	2	2	5	5	504201	1	35	0	2	1	2	4	1	5042	504204	50420101	14	1	1	325.415	0	91	397.109	348.99	385.04	425.148	383.762	363.164	440.521	320.231	344.015
792	35	2	2	50430101			1	2	1	35	35	2	1	2				9					504301	1	35	0	2	1	2	4	1	5043	504301	50430101	14	1	1	549.437	1	26	616.697	587.543	506.505	585.152	615.169	620.13	605.757	611.46	592.682
792	35	2	2	50430103			0	1	1	35	35	1	1	2	35	3	2	3	3	2	5	5	504301	1	35	0	2	1	2	4	1	5043	504301	50430101	8	1	1	549.437	1	26	546.784	605.041	610.602	579.785	557.65	601.392	575.557	631.904	557.741
792	35	2	2	50430104			0	2	1	35	35	2	1	1	35	2	2	2	3	1	4	4	504301	1	35	0	2	1	2	4	1	5043	504301	50430101	15	1	1	549.437	1	26	397.683	404.998	443.248	413.363	405.209	418.547	467.887	444.041	369.904
792	35	2	2	50430105			1	2	1	35	35	2	1	2	35	3	2	2	2	2	3	4	504301	1	35	0	2	1	2	4	1	5043	504301	50430101	9	1	1	549.437	1	26	497.578	504.523	547.083	534.575	522.018	581.52	579.024	545.817	501.575
792	35	2	2	50430107			0	2	1	35	35	2	2	2	35	1	1	2	3	2	2	5	504301	1	35	0	2	1	2	4	1	5043	504301	50430101	16	1	1	549.437	1	26	454.291	428.427	360.44	433.97	434.344	406.997	436.026	385.13	425.697
792	35	2	2	50430108			0	1	1	35	35	1	1	2				9					504301	1	35	0	2	1	2	4	1	5043	504301	50430101	17	1	1	549.437	1	26	565.428	596.544	613.887	579.089	554.077	576.415	565.615	594.84	544.76
792	35	2	2	50430109			0	1	1	35	35	1	1	2	35	1	1	3	3	3	5	5	504301	1	35	0	2	1	2	4	1	5043	504301	50430101	2	1	1	549.437	1	26	590.175	587.94	588.992	598.109	614.885	619.791	586.938	584.31	569.124
792	35	2	2	50430110			1	1	1	35	35	1	1	3	35	1	9	9	3	2	9	4	504301	1	35	0	2	1	2	4	1	5043	504301	50430101	3	1	1	549.437	1	26	460.572	446.029	484.096	496.996	470.909	505.02	509.107	475.572	511.255
792	35	2	2	50430111			1	1	1	35	35	1	1	2				9					504301	1	35	0	2	1	2	4	1	5043	504301	50430101	18	1	1	549.437	1	26	515.763	481.143	499.587	498.877	510.113	476.956	464.681	463.806	458.434
792	35	2	2	50430112			0	1	1	35	35	1	2	1				9					504301	1	35	0	2	1	2	4	1	5043	504301	50430101	10	1	1	549.437	1	26	487.105	556.647	510.975	562.019	549.376	541.601	544.251	574.893	513.768
792	35	2	2	50430113			0	2	1	35	35	2	3	2	35			9					504301	1	35	0	2	1	2	4	1	5043	504301	50430101	4	1	1	549.437	1	26	519.405	449.737	480.146	453.432	487.729	511.586	493.331	505.872	518.56
792	35	4	2	50440201			0	1	1	35	35	1	1	2	35	2	1	2	3	3	3	4	504401	1	35	0	3	1	2	4	1	5044	504402	50440101	18	1	1	225.657	1	79	527.05	567.43	642.361	605.659	586.696	534.647	489.883	521.445	541.758
792	35	4	2	50440202			1	1	1	35	35	1	1	3	35	2	4	2	2	2	2	1	504401	1	35	0	3	1	2	4	1	5044	504402	50440101	10	1	1	225.657	1	79	666.42	679.296	629.594	649.981	624.911	591.37	567.396	605.31	568.117
792	35	4	2	50440203			1	2	1	35	35	2	2	2	35	2	3	2	2	3	3	5	504401	1	35	0	3	1	2	4	1	5044	504402	50440101	1	1	1	225.657	1	79	599.273	632.583	602.498	616.553	568.324	563.569	588.503	569.189	596.47
792	35	4	2	50440204			0	1	1	35	35	1	1	3	35	4	3	2	2	1	1	3	504401	1	35	0	3	1	2	4	1	5044	504402	50440101	11	1	1	225.657	1	79	488.074	522.603	506.739	464.89	523.124	514.816	520.744	509.536	510.257
792	35	4	2	50440205			1	1	1	35	35	1	1	3	35	2	3	2	2	2	2	3	504401	1	35	0	3	1	2	4	1	5044	504402	50440101	12	1	1	225.657	1	79	571.154	508.926	564.78	563.111	572.914	560.801	619.726	504.94	525.476
792	35	4	2	50440206			0	2	1	35	35	2	1	3	35	5	5	2	1	1	3	3	504401	1	35	0	3	1	2	4	1	5044	504402	50440101	13	1	1	225.657	1	79	635.385	652.532	660.942	682.922	669.571	640.647	690.923	677.184	690.121
792	35	4	2	50440207			1	2	1	35	35	2	1	3	35	4	4	2	1	1	2	2	504401	1	35	0	3	1	2	4	1	5044	504402	50440101	14	1	1	225.657	1	79	661.235	585.542	685.954	598.341	600.4	607.789	616.465	652.22	607.224
792	35	4	2	50440208			0	2	1	35	35	2	1	3	35	5	5	1	1	1	1	1	504401	1	35	0	3	1	2	4	1	5044	504402	50440101	15	1	1	225.657	1	79	678.58	686.715	657.325	673.63	707	634.279	674.982	670.466	609.337
792	35	4	2	50440209			0	1	1	35	35	1	1	3	35	4	5	2	2	1	3	4	504401	1	35	0	3	1	2	4	1	5044	504402	50440101	2	1	1	225.657	1	79	652.63	626.775	672.074	660.465	625.929	624.544	592.184	636.589	580.187
792	35	4	2	50440210			1	1	1	35	35	1	1	3	35	4	4	2	2	1	5	2	504401	1	35	0	3	1	2	4	1	5044	504402	50440101	3	1	1	225.657	1	79	486.363	471.71	477.961	472.063	440.241	464.429	522.772	440.581	451.381
792	35	4	2	50440211			0	2	1	35	35	2	1	3	35	3	3	2	2	2	3	3	504401	1	35	0	3	1	2	4	1	5044	504402	50440101	4	1	1	225.657	1	79	600.393	616.274	601.629	626.342	608.581	542.79	577.997	630.966	562.794
792	35	4	2	50440212			0	2	1	35	35	2	1	3	35	2	4	2	2	2	3	3	504401	1	35	0	3	1	2	4	1	5044	504402	50440101	5	1	1	225.657	1	79	475.824	498.661	476.911	454.789	485.692	482.948	480.4	529.745	458.539
792	35	4	2	50440213			1	1	1	35	35	1	1	3	35	3	3	2	1	1	1	1	504401	1	35	0	3	1	2	4	1	5044	504402	50440101	6	1	1	225.657	1	79	558.677	514.083	542.448	533.976	587.904	564.832	559.837	584.812	528.434
792	35	4	2	50440214			0	1	1	35	35	1	1	3	35	2	4	2	2	2	4	4	504401	1	35	0	3	1	2	4	1	5044	504402	50440101	16	1	1	225.657	1	79	459.162	428.622	448.484	414.992	411.772	407.967	486.534	441.223	439.069
792	35	4	2	50440215			0	1	1	35	35	1	2	2	35	1	3	2	2	1	3	3	504401	1	35	0	3	1	2	4	1	5044	504402	50440101	7	1	1	225.657	1	79	555.023	550.667	552.142	520.687	571.999	560.035	606.556	574.254	567.296
792	35	4	2	50440216			1	1	1	35	35	1	1	3	35	4	4	1	1	2	1	1	504401	1	35	0	3	1	2	4	1	5044	504402	50440101	17	1	1	225.657	1	79	607.408	525.557	562.397	576.704	539.229	617.108	586.404	587.789	552.404
792	35	4	2	50440217			0	1	1	35	35	1	1	2	35	3	4	2	2	1	5	4	504401	1	35	0	3	1	2	4	1	5044	504402	50440101	8	1	1	225.657	1	79	397.181	379.154	396.136	389.759	378.724	438.418	345.779	401.146	398.488
792	35	4	2	50440218			1	2	1	35	35	2	1	2	35	5	5	2	2	2	4	4	504401	1	35	0	3	1	2	4	1	5044	504402	50440101	9	1	1	225.657	1	79	682.863	664.216	667.785	710.421	699.247	642.694	668.81	566.107	686.263
792	35	4	2	50440219			0	2	1	35	35	2	1	1	35	4	4	2	2	2	3	2	504401	1	35	0	3	1	2	4	1	5044	504402	50440101	18	1	1	225.657	1	79	581.428	565.009	557.977	524.419	551.612	555.072	553.617	538.985	628.199
792	35	4	2	50440220			0	1	1	35	35	1	1	3	35	3	3	2	2	1	4	2	504401	1	35	0	3	1	2	4	1	5044	504402	50440101	1	1	1	225.657	1	79	481.126	507.976	479.156	495.53	488.003	511.479	488.593	472.416	453.551
792	35	4	2	50440221			0	2	1	35	35	2	1	2	35	4	5	2	2	1	3	5	504401	1	35	0	3	1	2	4	1	5044	504402	50440101	2	1	1	225.657	1	79	513.895	442.517	474.974	459.36	488.296	475.853	474.022	453.517	469.859
792	35	4	2	50440222			0	2	1	35	35	2	1	3	35	3	5	2	2	1	3	3	504401	1	35	0	3	1	2	4	1	5044	504402	50440101	3	1	1	225.657	1	79	472.237	447.495	498.214	446.794	437.612	463.062	433.538	486.575	421.085
792	35	4	2	50440223			0	2	1	35	35	2	1	2	35	4	3	2	2	3	2	4	504401	1	35	0	3	1	2	4	1	5044	504402	50440101	10	1	1	225.657	1	79	425.163	428.624	376.689	450.143	429.328	427.858	417.167	415.924	363.725
792	35	2	2	50450301			0	1	2	35	35	1	1	2	35	1	2	2	2	1	1	2	504501	1	35	0	2	1	2	4	1	5045	504503	50450101	18	1	1	118.023	1	1	489.099	499.185	462.518	471.651	499.521	547.264	503.354	579.404	465.297
792	35	2	2	50450302			1	2	2	35	35	2	2	3	35	4	4	2	2	1	3	3	504501	1	35	0	2	1	2	4	1	5045	504503	50450101	4	1	1	118.023	1	1	502.344	547.079	522.929	538.47	552.335	541.41	584.136	567.658	552.499
792	35	2	2	50450303			0	1	2	35	35	1	2	1	35	3	3	2	2	3	5	3	504501	1	35	0	2	1	2	4	1	5045	504503	50450101	10	1	1	118.023	1	1	437.821	467.354	422.219	464.463	399.459	483.678	419.406	441.752	431.979
792	35	2	2	50450304			1	1	2	35	35	1	1	3	35	5	4	2	1	1	3	2	504501	1	35	0	2	1	2	4	1	5045	504503	50450101	5	1	1	118.023	1	1	579.367	616.485	573.365	588.687	576.553	605.034	622.066	566.319	563.978
792	35	2	2	50450307			1	1	2	35	35	1	1	2	35	3	3	2	3	1	5	4	504501	1	35	0	2	1	2	4	1	5045	504503	50450101	7	1	1	118.023	1	1	578.955	575.575	525.252	509.278	591.418	583.04	556.586	617.471	583.295
792	35	2	2	50450308			0	1	2	35	35	1	2	2	35	3	4	2	2	2	5	4	504501	1	35	0	2	1	2	4	1	5045	504503	50450101	8	1	1	118.023	1	1	466.64	448.09	448.584	523.461	481.843	553.16	499.89	508.455	467.933
792	35	2	2	50450309			1	2	2	35	35	2	1	2	35	2	3	2	2	2	3	2	504501	1	35	0	2	1	2	4	1	5045	504503	50450101	9	1	1	118.023	1	1	392.313	412.97	434.862	365.146	396.382	412.032	393.032	390.017	396.747
792	35	2	2	50450310			1	1	2	35	35	1	1	2	35	1	2	3	3	2	5	4	504501	1	35	0	2	1	2	4	1	5045	504503	50450101	12	1	1	118.023	1	1	449.765	433.119	415.844	442.712	425.882	411.102	455.656	415.168	476.632
792	35	2	2	50450313			0	1	2	35	35	1	2	2	35	3	4	2	2	2	1	3	504501	1	35	0	2	1	2	4	1	5045	504503	50450101	14	1	1	118.023	1	1	615.821	640.101	628.28	646.241	588.986	522.997	619.791	569.886	582.332
792	35	2	2	50450314			0	2	2	35	35	2	3	2	35	3	4	2	2	2	2	2	504501	1	35	0	2	1	2	4	1	5045	504503	50450101	15	1	1	118.023	1	1	537.27	700.481	724.312	706.671	773.132	657.493	712.451	596.369	656.432
792	35	2	2	50450316			0	1	2	35	35	1	2	2	35	1	2	2	2	1	2	3	504501	1	35	0	2	1	2	4	1	5045	504503	50450101	17	1	1	118.023	1	1	483.345	586.257	555.664	608.083	578.414	562.417	579.809	569.539	563.307
792	35	2	2	50450317			1	1	2	35	35	1	1	2	35	1	2	2	3	2	5	4	504501	1	35	0	2	1	2	4	1	5045	504503	50450101	18	1	1	118.023	1	1	560.594	516.005	524.466	513.738	519.954	543.766	497.8	505.568	511.177
792	35	2	2	50450318			0	1	2	35	35	1	2	2	35	2	2	2	2	2	3	2	504501	1	35	0	2	1	2	4	1	5045	504503	50450101	10	1	1	118.023	1	1	551.545	601.646	615.101	581.61	621.781	614.869	571.546	633.304	633.397
792	35	2	2	50450319			1	2	2	35	35	2	1	3	35	1	3	2	3	2	5	4	504501	1	35	0	2	1	2	4	1	5045	504503	50450101	2	1	1	118.023	1	1	603.436	593.058	624.505	594.401	638.386	619.637	562.942	611.666	591.927
792	35	2	2	50450320			0	1	2	35	35	1	1	3	35	3	4	2	2	2	3	3	504501	1	35	0	2	1	2	4	1	5045	504503	50450101	3	1	1	118.023	1	1	520.363	500.152	544.864	509.46	522.374	547.205	540.136	569.762	483.053
792	35	2	2	50450321			0	1	2	35	35	1	1	2	35	5	4	2	1	1	1	3	504501	1	35	0	2	1	2	4	1	5045	504503	50450101	4	1	1	118.023	1	1	548.794	602.686	575.766	571.766	587.984	581.335	574.195	562.967	552.153
792	35	2	2	50450322			0	1	2	35	35	1	2	2	35	3	3	2	1	1	1	1	504501	1	35	0	2	1	2	4	1	5045	504503	50450101	5	1	1	118.023	1	1	634.644	635.514	664.854	604.446	662.639	594.147	602.33	623.271	639.815
792	35	2	2	50450323			0	1	2	35	35	1	1	2	35	5	5	2	1	2	2	4	504501	1	35	0	2	1	2	4	1	5045	504503	50450101	6	1	1	118.023	1	1	599.411	612.353	606.167	632.488	659.354	635.315	620.875	654.003	635.838
792	35	2	2	50450324			0	2	2	35	35	2	1	2	35	5	5	2	1	1	3	2	504501	1	35	0	2	1	2	4	1	5045	504503	50450101	7	1	1	118.023	1	1	554.35	583.076	536.021	602.643	584.961	591.705	627.094	612.32	593.75
792	35	2	2	50450325			0	2	2	35	35	2	3	2	35	3	4	2	2	1	1	3	504501	1	35	0	2	1	2	4	1	5045	504503	50450101	8	1	1	118.023	1	1	517.565	527.595	555.688	529.173	535.059	526.565	517.442	524.372	557.467
792	35	2	2	50450326			0	2	2	35	35	2	1	3	35	3	3	2	2	2	4	4	504501	1	35	0	2	1	2	4	1	5045	504503	50450101	9	1	1	118.023	1	1	563.077	561.613	550.338	511.145	540.835	557.64	572.95	583.877	600.568
792	35	2	2	50450327			1	1	2	35	35	1	1	2	35	5	5	1	1	1	1	3	504501	1	35	0	2	1	2	4	1	5045	504503	50450101	11	1	1	118.023	1	1	636.117	580.908	637.081	629.568	614.964	607.983	555.415	567.71	604.534
792	35	2	2	50450328			0	2	2	35	35	2	2	2	35	4	2	2	2	1	2	3	504501	1	35	0	2	1	2	4	1	5045	504503	50450101	12	1	1	118.023	1	1	464.597	526	512.73	524.408	515.931	518.31	503.032	469.714	507.262
792	35	2	2	50450329			0	2	2	35	35	2	1	2	35	1	3	2	3	2	5	5	504501	1	35	0	2	1	2	4	1	5045	504503	50450101	13	1	1	118.023	1	1	645.963	602.677	611.256	542.857	535.088	540.267	544.426	606.118	580.711
792	35	2	2	50450331			0	2	2	35	35	2	2	3	35	3	2	2	3	2	4	4	504501	1	35	0	2	1	2	4	1	5045	504503	50450101	1	1	1	118.023	1	1	556.575	541.471	549.712	519.521	572.872	561.802	553.526	547.069	539.807
792	35	2	2	50450333			0	1	2	35	35	1	2	2	35	4	5	2	1	1	2	2	504501	1	35	0	2	1	2	4	1	5045	504503	50450101	2	1	1	118.023	1	1	627.934	610.504	593.415	591.558	617.469	627.519	647.877	565.642	614.634
792	35	2	2	50450702			0	2	1	35	35	2	2	3	35	1	2	2	3	2	5	5	504502	2	35	0	1	1	2	4	1	5045	504507	50450202	16	1	1	109.592	1	1	475.225	525.797	480.217	474.012	528.613	522.987	503.377	549.01	487.445
792	35	2	2	50450704			0	1	1	35	35	1	2	9	35	2	2	2	2	3	4	2	504502	2	35	0	1	1	2	4	1	5045	504507	50450202	18	1	1	109.592	1	1	435.442	497.561	512.466	489.564	507.918	495.454	456.027	520.075	470.533
792	35	2	2	50450705			0	2	1	35	35	2	1	2	35	1	3	2	3	3	4	4	504502	2	35	0	1	1	2	4	1	5045	504507	50450202	10	1	1	109.592	1	1	499.055	453.205	481.083	595.664	450.439	482.711	462.589	483.839	500.527
792	35	2	2	50450706			0	2	1	35	35	2	2	2	35	1	1	3	3	2	4	5	504502	2	35	0	1	1	2	4	1	5045	504507	50450202	4	1	1	109.592	1	1	495.952	469.054	489.186	487.638	474.683	457.048	475.956	429.935	483.452
792	35	2	2	50450707			0	1	1	35	35	1	2	3	35	5	3	2	2	1	4	4	504502	2	35	0	1	1	2	4	1	5045	504507	50450202	5	1	1	109.592	1	1	595.007	556.129	546.218	523.779	541.254	511.815	529.949	558.851	573.53
792	35	2	2	50450708			1	1	1	35	35	1	1	3	35	3	3	2	2	1	1	3	504502	2	35	0	1	1	2	4	1	5045	504507	50450202	6	1	1	109.592	1	1	613.437	634.898	652.65	631.379	685.785	635.376	660.432	591.542	598.714
792	35	2	2	50450709			0	2	1	35	35	2	1	3	35	2	2	2	3	1	4	4	504502	2	35	0	1	1	2	4	1	5045	504507	50450202	11	1	1	109.592	1	1	479.602	522.048	512.325	476.014	527.41	499.142	473.532	506.346	501.95
792	35	2	2	50450710			0	1	1	35	35	1	1	3	35	3	3	2	2	1	3	2	504502	2	35	0	1	1	2	4	1	5045	504507	50450202	7	1	1	109.592	1	1	503.452	524.496	584.738	577.58	559.414	564.634	547.196	575.413	530.06
792	35	2	2	50450712			0	1	1	35	35	1	1	3	35	1	4	2	2	1	3	3	504502	2	35	0	1	1	2	4	1	5045	504507	50450202	13	1	1	109.592	1	1	401.598	399.724	392.737	373.948	434.216	411.105	418.196	425.831	411.629
792	35	2	2	50450714			1	1	1	35	35	1	1	3	35	2	4	2	2	2	1	3	504502	2	35	0	1	1	2	4	1	5045	504507	50450202	8	1	1	109.592	1	1	591.359	599.745	538.936	587.557	617.102	510.401	560.419	606.317	581.565
792	35	2	2	50450715			0	2	1	35	35	2	1	2	35	3	2	2	3	1	5	3	504502	2	35	0	1	1	2	4	1	5045	504507	50450202	9	1	1	109.592	1	1	462.039	442.639	434.46	427.93	466.368	514.235	462.631	419.248	451.653
792	35	2	2	50450716			0	1	1	35	35	1	1	2	35	1	2	2	3	2	5	3	504502	2	35	0	1	1	2	4	1	5045	504507	50450202	1	1	1	109.592	1	1	424.523	445.557	460.647	459.825	473.713	490.533	475.236	417.094	431.382
792	35	2	2	50450717			1	2	1	35	35	2	1	3	35	1	2	2	3	2	4	2	504502	2	35	0	1	1	2	4	1	5045	504507	50450202	2	1	1	109.592	1	1	579.169	514.77	536.778	574.789	585.387	571.298	544.047	559.52	534.665
792	35	2	2	50450718			0	2	2	35	35	2	2	2	35	2	2	2	2	2	3	3	504502	2	35	0	1	1	2	4	1	5045	504507	50450202	3	1	1	109.592	1	1	484.286	524.226	582.932	521.511	496.942	495.029	553.127	494.642	566.486
792	35	2	2	50450719			0	2	2	35	35	2	1	9	35	4	3	2	2	1	3	3	504502	2	35	0	1	1	2	4	1	5045	504507	50450202	4	1	1	109.592	1	1	547.498	584.433	587.08	470.519	552.136	506.427	554.617	545.165	567.436
792	35	2	2	50450720			0	1	2	35	35	1	2	3	35	3	3	2	2	2	4	3	504502	2	35	0	1	1	2	4	1	5045	504507	50450202	15	1	1	109.592	1	1	536.616	574.559	576.007	561.669	547.973	544.614	523.521	561.798	541.081
792	35	2	2	50450721			0	2	2	35	35	2	1	2	35	3	2	2	2	1	2	3	504502	2	35	0	1	1	2	4	1	5045	504507	50450202	16	1	1	109.592	1	1	525.401	564.596	537.88	492.095	537.393	507.261	521.441	577.327	504.368
792	35	2	2	50450722			0	2	2	35	35	2	2	2				9					504502	2	35	0	1	1	2	4	1	5045	504507	50450202	17	1	1	109.592	1	1	363.289	364.303	365.445	422.878	387.452	418.512	342.516	372.403	390.198
792	35	2	2	50450723			1	1	2	35	35	1	2	3	35	3	3	2	2	1	4	2	504502	2	35	0	1	1	2	4	1	5045	504507	50450202	5	1	1	109.592	1	1	560.985	528.42	535.578	513.857	548.382	518.74	537.681	532.716	451.617
792	35	2	2	50450724			0	2	2	35	35	2	3	3	35	3	4	2	2	2	3	3	504502	2	35	0	1	1	2	4	1	5045	504507	50450202	6	1	1	109.592	1	1	577.392	611.924	606.917	622.48	586.937	574.181	609.257	595.197	580.647
792	35	2	2	50450725			0	2	2	35	35	2	1	2	35	3	4	2	2	1	3	4	504502	2	35	0	1	1	2	4	1	5045	504507	50450202	18	1	1	109.592	1	1	498.795	608.771	487.367	522.626	531.86	468.301	489.771	453.219	500.342
792	35	2	2	50450726			0	2	2	35	35	2	2	3	35	2	5	2	2	2	5	2	504502	2	35	0	1	1	2	4	1	5045	504507	50450202	10	1	1	109.592	1	1	430.216	479.763	456.046	471.878	447.421	497.494	458.932	499.808	463.717
792	35	2	2	50450728			1	2	2	35	35	2	2	3	35	4	5	1	1	1	1	1	504502	2	35	0	1	1	2	4	1	5045	504507	50450202	11	1	1	109.592	1	1	478.088	492.601	467.114	518.684	545.744	526.321	537.899	513.847	520.526
792	35	2	2	50450729			0	1	2	35	35	1	3	2	35	3	3	2	2	2	4	2	504502	2	35	0	1	1	2	4	1	5045	504507	50450202	12	1	1	109.592	1	1	522.199	519.484	481.389	526.349	538.407	525.461	448.009	505.256	540.804
792	35	2	2	50450730			0	1	2	35	35	1	2	2	35	4	4	2	1	1	1	1	504502	2	35	0	1	1	2	4	1	5045	504507	50450202	8	1	1	109.592	1	1	513.913	463.458	469.904	462.893	457.833	452.246	550.283	445.933	497.043
792	35	2	2	50450731			1	2	2	35	35	2	1	3	35	2	4	2	2	1	1	3	504502	2	35	0	1	1	2	4	1	5045	504507	50450202	13	1	1	109.592	1	1	559.515	548.801	543.758	613.147	562.945	474.446	578.958	552.521	559.496
792	35	2	2	50450733			0	1	2	35	35	1	1	3	35	5	3	2	1	2	2	1	504502	2	35	0	1	1	2	4	1	5045	504507	50450202	14	1	1	109.592	1	1	584.198	604.184	601.814	590.867	588.234	567.893	613.148	598.452	619.421
792	35	2	2	50450734			0	1	2	35	35	1	2	3	35	3	3	2	3	2	5	4	504502	2	35	0	1	1	2	4	1	5045	504507	50450202	1	1	1	109.592	1	1	381.124	322.75	322.193	309.384	331.576	295.511	311.719	358.168	367.641
792	35	4	2	50460201			0	2	1	35	35	2	1	3	35	2	2	2	3	1	4	4	504601	1	35	0	2	1	2	4	1	5046	504602	50460101	11	1	1	149.024	1	23	514.064	473.85	465.445	467.307	490.412	453.477	489.211	530.183	469.783
792	35	4	2	50460203			0	2	1	35	35	2	1	2	35	1	1	3	3	2	4	5	504601	1	35	0	2	1	2	4	1	5046	504602	50460101	6	1	1	149.024	1	23	567.075	586.74	555.129	567.104	555.915	558.793	502.499	582.803	542.29
792	35	4	2	50460204			1	1	1	35	35	1	2	2	35	1	1	3	3	1	5	5	504601	1	35	0	2	1	2	4	1	5046	504602	50460101	7	1	1	149.024	1	23	532.899	554.974	553.447	527.431	579.022	503.846	549.261	552.433	566.385
792	35	4	2	50460206			0	1	1	35	35	1	1	3	35	3	2	2	2	2	4	2	504601	1	35	0	2	1	2	4	1	5046	504602	50460101	8	1	1	149.024	1	23	481.595	518.594	484.484	531.742	487.955	525.329	500.824	498.687	500.188
792	35	4	2	50460208			0	1	1	35	35	1	1	2	35	3	3	2	2	2	1	3	504601	1	35	0	2	1	2	4	1	5046	504602	50460101	9	1	1	149.024	1	23	569.962	547.357	549.304	586.335	569.046	577.164	586.476	611.32	520.482
792	35	4	2	50460209			0	1	1	35	35	1	1	2	35	4	4	2	2	2	3	7	504601	1	35	0	2	1	2	4	1	5046	504602	50460101	15	1	1	149.024	1	23	593.905	577.942	632.905	610.023	573.464	591.086	605.446	569.715	565.772
792	35	4	2	50460210			0	1	1	35	35	1	1	3				9					504601	1	35	0	2	1	2	4	1	5046	504602	50460101	1	1	1	149.024	1	23	484.436	536.316	470.05	500.108	503.632	525.048	478.342	523.487	456.366
792	35	4	2	50460211			1	1	1	35	35	1	1	2	35	1	4	2	2	2	3	4	504601	1	35	0	2	1	2	4	1	5046	504602	50460101	16	1	1	149.024	1	23	525.886	532.586	559.678	568.651	524.515	617.811	573.672	462.676	560.859
792	35	4	2	50460212			1	2	1	35	35	2	1	3	35	5	5	1	1	2	3	1	504601	1	35	0	2	1	2	4	1	5046	504602	50460101	17	1	1	149.024	1	23	465.9	457.77	447.04	389.526	437.983	484.833	436.128	443.091	472.102
792	35	4	2	50460213			0	2	1	35	35	2	1	2	35	3	4	2	2	2	4	2	504601	1	35	0	2	1	2	4	1	5046	504602	50460101	2	1	1	149.024	1	23	510.607	512.62	492.061	496.949	515.248	466.749	487.955	470.576	502.922
792	35	4	2	50460214			1	1	1	35	35	1	1	3	35	3	3	2	2	1	2	4	504601	1	35	0	2	1	2	4	1	5046	504602	50460101	3	1	1	149.024	1	23	569.773	563.309	548.936	503.703	550.14	507.767	572.755	483.123	487.007
792	35	4	2	50460216			0	1	1	35	35	1	2	2	35	4	4	2	2	1	4	4	504601	1	35	0	2	1	2	4	1	5046	504602	50460101	18	1	1	149.024	1	23	477.717	453.382	439.867	480.004	481.297	432.761	523.041	448.722	421.639
792	35	4	2	50460217			0	2	1	35	35	2	1	3	35	4	3	2	1	1	1	1	504601	1	35	0	2	1	2	4	1	5046	504602	50460101	5	1	1	149.024	1	23	495.015	453.321	487.424	461.799	502.854	500.475	443.392	468.315	467.211
792	35	4	2	50460218			1	2	2	35	35	2	2	2	35	4	3	2	1	1	1	1	504601	1	35	0	2	1	2	4	1	5046	504602	50460101	6	1	1	149.024	1	23	462.175	497.664	457.352	510.126	539.933	500.32	462.585	480.338	487.6
792	35	4	2	50460219			0	2	2	35	35	2	1	3				9					504601	1	35	0	2	1	2	4	1	5046	504602	50460101	10	1	1	149.024	1	23	480.835	562.524	536.567	560.239	510.414	530.951	480.559	529.312	498.632
792	35	4	2	50460220			1	1	2	35	35	1	2	3	35	4	4	2	2	1	3	2	504601	1	35	0	2	1	2	4	1	5046	504602	50460101	11	1	1	149.024	1	23	518.915	508.233	533.456	549.489	500.922	562.386	518.84	531.387	569.57
792	35	4	2	50460222			0	1	2	35	35	1	1	3	35	3	4	2	2	1	3	3	504601	1	35	0	2	1	2	4	1	5046	504602	50460101	8	1	1	149.024	1	23	485.044	529.835	496.205	480.264	512.467	479.501	480.54	467.637	495.935
792	35	4	2	50460223			0	2	2	35	35	2	1	2	35	5	5	2	1	2	3	1	504601	1	35	0	2	1	2	4	1	5046	504602	50460101	12	1	1	149.024	1	23	408.097	398.256	404.111	420.275	379.03	446.505	411.5	379.911	423.357
792	35	4	2	50460224			0	1	2	35	35	1	1	2	35	3	2	2	2	1	5	2	504601	1	35	0	2	1	2	4	1	5046	504602	50460101	13	1	1	149.024	1	23	447.383	423.463	393.232	423.07	382.966	429.101	379.485	423.914	419.756
792	35	4	2	50460225			1	1	2	35	35	1	2	3	35	2	1	2	3	2	4	7	504601	1	35	0	2	1	2	4	1	5046	504602	50460101	9	1	1	149.024	1	23	441.827	532.632	472.51	516.958	527.52	504.561	503.966	519.974	479.253
792	35	4	2	50460226			0	2	2	35	35	2	2	3	35	4	3	2	2	3	2	3	504601	1	35	0	2	1	2	4	1	5046	504602	50460101	14	1	1	149.024	1	23	517.708	529.847	476.786	524.921	498.508	542.622	528.293	478.394	521.762
792	35	4	2	50460228			0	2	2	35	35	2	1	2	35	2	2	2	2	1	1	3	504601	1	35	0	2	1	2	4	1	5046	504602	50460101	1	1	1	149.024	1	23	691.197	634.26	702.308	699.459	662.507	617.63	673.181	617.388	599.507
792	35	4	2	50460231			0	1	2	35	35	1	2	2	35	3	2	2	2	1	4	3	504601	1	35	0	2	1	2	4	1	5046	504602	50460101	16	1	1	149.024	1	23	447.846	421.311	476.585	438.699	468.19	480.26	476.39	443.825	541.099
792	35	4	2	50460234			0	1	2	35	35	1	1	2				9					504601	1	35	0	2	1	2	4	1	5046	504602	50460101	4	1	1	149.024	1	23	590.803	573.318	554.103	554.65	581.225	552.278	534.801	573.039	588.787
792	35	4	2	50460503			0	1	1	35	35	1	3	2	35	5	4	2	1	1	3	2	504602	2	35	0	2	1	2	4	1	5046	504605	50460202	10	1	1	144.217	1	23	599.909	543.904	577.862	597.422	619.714	644.85	678.664	699.281	652.819
792	35	4	2	50460504			1	2	1	35	35	2	2	3				9					504602	2	35	0	2	1	2	4	1	5046	504605	50460202	11	1	1	144.217	1	23	432.854	440.599	452.586	502.117	477.175	483.739	439.911	465.973	428.716
792	35	4	2	50460505			1	1	1	35	35	1	1	2	35	2	1	3	3	3	5	9	504602	2	35	0	2	1	2	4	1	5046	504605	50460202	5	1	1	144.217	1	23	505.861	502.602	503.576	512.968	503.851	538.802	516.47	540.761	490.098
792	35	4	2	50460506			0	2	1	35	35	2	2	3	35	4	5	1	1	1	3	1	504602	2	35	0	2	1	2	4	1	5046	504605	50460202	12	1	1	144.217	1	23	547.104	552.373	468.66	550.384	536.539	513.884	564.531	504.134	593.659
792	35	4	2	50460507			1	1	1	35	35	1	2	2	35	3	3	2	2	2	3	4	504602	2	35	0	2	1	2	4	1	5046	504605	50460202	13	1	1	144.217	1	23	559.778	498.462	497.522	505.302	537.994	534.028	506.291	575.85	488.861
792	35	4	2	50460508			1	2	1	35	35	2	2	3	35	1	3	2	2	2	1	2	504602	2	35	0	2	1	2	4	1	5046	504605	50460202	6	1	1	144.217	1	23	516.471	530.036	538.231	527.78	520.144	517.942	543.802	506.454	493.698
792	35	4	2	50460510			0	1	1	35	35	1	1	3	35	3	3	2	2	2	2	4	504602	2	35	0	2	1	2	4	1	5046	504605	50460202	7	1	1	144.217	1	23	576.549	599.313	576.039	559.825	585.929	539.577	520.39	597.469	562.33
792	35	4	2	50460511			0	1	1	35	35	1	2	3	35	3	3	2	1	2	1	1	504602	2	35	0	2	1	2	4	1	5046	504605	50460202	14	1	1	144.217	1	23	505.916	514.498	498.362	464.141	527.224	489.562	472.211	556.966	513.802
792	35	4	2	50460513			0	2	1	35	35	2	1	3	35	9	3	2	2	1	2	3	504602	2	35	0	2	1	2	4	1	5046	504605	50460202	8	1	1	144.217	1	23	586.203	533.69	570.956	550.876	551.541	567.242	554.29	566.165	550.926
792	35	4	2	50460516			0	2	1	35	35	2	1	2	35	2	4	2	2	1	3	2	504602	2	35	0	2	1	2	4	1	5046	504605	50460202	9	1	1	144.217	1	23	619.909	588.691	594.548	613.294	640.169	635.825	610.931	650.893	622.78
792	35	4	2	50460518			1	2	2	35	35	2	2	3	35	1	9	2	3	2	4	5	504602	2	35	0	2	1	2	4	1	5046	504605	50460202	17	1	1	144.217	1	23	570.013	597.479	628.704	535.527	634.465	535.622	547.687	564.268	586.016
792	35	4	2	50460519			0	2	2	35	35	2	1	3	35	5	5	2	1	2	2	9	504602	2	35	0	2	1	2	4	1	5046	504605	50460202	18	1	1	144.217	1	23	547.141	487.3	469.181	500.723	492.001	462.654	452.689	454.558	429.253
792	35	4	2	50460520			0	1	2	35	35	1	3	2	35	5	2	2	2	2	2	3	504602	2	35	0	2	1	2	4	1	5046	504605	50460202	10	1	1	144.217	1	23	536.384	563.698	565.466	599.299	529.178	516.427	487.845	516.515	607.775
792	35	4	2	50460521			0	2	2	35	35	2	3	3	35	4	3	2	1	1	1	1	504602	2	35	0	2	1	2	4	1	5046	504605	50460202	2	1	1	144.217	1	23	578.853	595.099	605.094	582.881	552.788	627.512	548.664	566.21	551.805
792	35	4	2	50460522			0	2	2	35	35	2	2	3	35	4	4	1	1	1	1	1	504602	2	35	0	2	1	2	4	1	5046	504605	50460202	3	1	1	144.217	1	23	594.43	560.882	572.94	608.022	580.34	612.745	557.603	532.253	538.556
792	35	4	2	50460523			0	2	2	35	35	2	1	2	35	3	5	2	2	1	3	4	504602	2	35	0	2	1	2	4	1	5046	504605	50460202	4	1	1	144.217	1	23	493.06	516.388	476.641	492.036	503.161	495.646	459.651	480.105	559.132
792	35	4	2	50460524			0	1	2	35	35	1	3	3	35	3	3	2	2	1	1	2	504602	2	35	0	2	1	2	4	1	5046	504605	50460202	11	1	1	144.217	1	23	624.787	559.161	590.585	554.29	623.968	593.503	596.797	557.989	637.442
792	35	4	2	50460525			0	2	2	35	35	2	3	2	35	2	4	2	2	2	3	4	504602	2	35	0	2	1	2	4	1	5046	504605	50460202	12	1	1	144.217	1	23	541.147	523.503	504.825	484.787	437.896	477.85	495.109	562.329	464.336
792	35	4	2	50460526			0	2	2	35	35	2	2	3	35	4	4	1	1	1	1	1	504602	2	35	0	2	1	2	4	1	5046	504605	50460202	13	1	1	144.217	1	23	587.574	590.674	580.937	631.304	595.635	617.894	587.008	617.736	581.598
792	35	4	2	50460527			0	1	2	35	35	1	2	2	35	4	4	2	1	1	2	1	504602	2	35	0	2	1	2	4	1	5046	504605	50460202	5	1	1	144.217	1	23	538.635	530.917	506.606	486.023	518.155	465.612	521.204	463.669	495.305
792	35	4	2	50460529			0	2	2	35	35	2	1	2	35	4	5	2	2	1	4	4	504602	2	35	0	2	1	2	4	1	5046	504605	50460202	7	1	1	144.217	1	23	577.222	570.767	525.464	491.568	548.753	544.091	542.582	543.641	550.7
792	35	4	2	50460531			0	1	2	35	35	1	1	2	35	1	3	2	2	2	1	3	504602	2	35	0	2	1	2	4	1	5046	504605	50460202	14	1	1	144.217	1	23	571.093	537.942	592.601	613.564	541.043	548.69	641.999	554.326	561.822
792	35	4	2	50460532			1	1	2	35	35	1	2	2	35	4	4	2	2	2	3	4	504602	2	35	0	2	1	2	4	1	5046	504605	50460202	8	1	1	144.217	1	23	491.339	505.821	445.819	505.716	473.834	471.639	453.66	484.576	491.158
792	35	4	2	50460533			0	1	2	35	35	1	1	3	35	3	4	2	2	1	3	4	504602	2	35	0	2	1	2	4	1	5046	504605	50460202	9	1	1	144.217	1	23	577.942	558.842	568.512	587.298	604.939	599.222	541.792	597.885	536.271
792	35	4	1	50470102			0	1	1	35	35	1	2	1	35	1	1	3	3	1	4	4	504701	1	35	0	2	1	2	4	1	5047	504701	50470101	15	1	1	399.169	1	53	622.613	523.457	538.28	564.934	523.276	584.45	570.411	512.759	580.459
792	35	4	1	50470103			1	1	1	35	35	1	1	3	35	2	1	3	3	2	5	4	504701	1	35	0	2	1	2	4	1	5047	504701	50470101	16	1	1	399.169	1	53	462.831	502.12	487.687	455.359	458.325	489.738	437.726	505.356	473.987
792	35	4	1	50470104			0	1	1	35	35	1	1	2	35	3	2	2	2	2	3	1	504701	1	35	0	2	1	2	4	1	5047	504701	50470101	17	1	1	399.169	1	53	651.778	557.147	639.297	677.916	633.798	671.088	564.019	609.218	650.465
792	35	4	1	50470105			0	2	1	35	35	2	1	2	35	3	2	2	2	1	3	4	504701	1	35	0	2	1	2	4	1	5047	504701	50470101	18	1	1	399.169	1	53	398.747	453.14	384.821	487.455	472.572	462.842	450.45	455.809	425.458
792	35	4	1	50470106			0	2	1	35	35	2	1	3	35	2	2	2	3	1	3	4	504701	1	35	0	2	1	2	4	1	5047	504701	50470101	2	1	1	399.169	1	53	476.762	481.508	482.487	518.99	488.823	463.634	521.982	506.532	501.604
792	35	4	1	50470107			1	1	1	35	35	1	1	3	35	3	3	2	3	2	5	4	504701	1	35	0	2	1	2	4	1	5047	504701	50470101	3	1	1	399.169	1	53	525.913	526.843	521.684	535.508	500.192	549.447	549.382	518.813	531.883
792	35	4	1	50470108			0	2	1	35	35	2	1	2	35	3	2	2	3	1	5	5	504701	1	35	0	2	1	2	4	1	5047	504701	50470101	4	1	1	399.169	1	53	553.231	528.874	555.08	585.509	524.345	546.674	560.516	531.169	563.087
792	35	4	1	50470109			0	2	1	35	35	2	2	2	35	2	1	3	3	2	3	4	504701	1	35	0	2	1	2	4	1	5047	504701	50470101	5	1	1	399.169	1	53	468.252	342.468	448.924	392.067	411.123	399.352	386.718	396.341	404.423
792	35	4	1	50470110			1	1	1	35	35	1	1	2	35	2	3	2	3	2	4	6	504701	1	35	0	2	1	2	4	1	5047	504701	50470101	10	1	1	399.169	1	53	592.16	579.15	582.466	574.222	629.535	587.444	588.992	619.604	682.126
792	35	4	1	50470111			0	2	1	35	35	2	2	3	35	1	2	2	3	2	3	4	504701	1	35	0	2	1	2	4	1	5047	504701	50470101	6	1	1	399.169	1	53	360.436	408.559	290.697	410.519	366.684	411.566	406.237	369.87	381.731
792	35	4	1	50470112			1	2	1	35	35	2	1	9	35	2	1	3	3	1	5	4	504701	1	35	0	2	1	2	4	1	5047	504701	50470101	7	1	1	399.169	1	53	492.23	509.78	542.014	478.507	511.658	436.881	408.645	451.614	479.385
792	35	4	1	50470113			0	2	1	35	35	2	1	3	35	2	2	2	2	2	3	2	504701	1	35	0	2	1	2	4	1	5047	504701	50470101	11	1	1	399.169	1	53	390.922	411.325	395.035	379.273	363.635	392.993	344.374	384.979	359.606
792	35	4	1	50470114			0	1	1	35	35	1	1	2	35	5	1	2	2	2	3	3	504701	1	35	0	2	1	2	4	1	5047	504701	50470101	12	1	1	399.169	1	53	553.288	522.414	520.943	573.435	555.876	556.044	554.593	520.342	516.417
792	35	3	3	50480203			1	1	1	35	35	1	1	3	35	3	2	2	2	1	3	3	504801	1	35	0	3	1	2	4	1	5048	504802	50480101	14	1	1	104.711	1	43	484.093	493.019	481.093	441.098	473.956	435.924	513.747	467.478	489.751
792	35	3	3	50480204			1	1	1	35	35	1	3	2	35	2	2	2	2	2	3	7	504801	1	35	0	3	1	2	4	1	5048	504802	50480101	9	1	1	104.711	1	43	446.414	476.766	480.433	428.398	418.787	436.053	482.936	362.19	446.461
792	35	3	3	50480205			0	2	1	35	35	2	2	2				9					504801	1	35	0	3	1	2	4	1	5048	504802	50480101	1	1	1	104.711	1	43	559.059	497.795	533.912	481.245	503.887	486.273	509.306	536.188	482.12
792	35	3	3	50480206			0	2	1	35	35	2	1	3	35	9	9	9	9	9	9	9	504801	1	35	0	3	1	2	4	1	5048	504802	50480101	15	1	1	104.711	1	43	475.308	445.464	455.237	447.897	432.083	403.473	406.517	431.983	471.462
792	35	3	3	50480207			0	1	1	35	35	1	1	3	35	3	4	2	2	2	3	5	504801	1	35	0	3	1	2	4	1	5048	504802	50480101	2	1	1	104.711	1	43	426.858	499.351	484.85	499.594	511.72	484.658	473.028	456.61	475.776
792	35	3	3	50480209			0	2	1	35	35	2	1	3	35	4	4	2	1	2	1	9	504801	1	35	0	3	1	2	4	1	5048	504802	50480101	3	1	1	104.711	1	43	571.821	536.066	527.281	592.798	617.03	598.795	577.169	582.131	595.56
792	35	3	3	50480210			1	1	1	35	35	1	1	2	35	3	3	2	2	9	3	2	504801	1	35	0	3	1	2	4	1	5048	504802	50480101	4	1	1	104.711	1	43	506.931	485.317	512.225	514.188	485.811	550.592	529.673	543.034	568.719
792	35	3	3	50480211			0	1	1	35	35	1	1	3	35	5	4	2	1	3	3	2	504801	1	35	0	3	1	2	4	1	5048	504802	50480101	5	1	1	104.711	1	43	521.848	473.743	509.617	505.743	528.259	490.52	498.457	496.566	533.185
792	35	3	3	50480212			0	1	1	35	35	1	2	2	35	3	3	2	2	2	3	4	504801	1	35	0	3	1	2	4	1	5048	504802	50480101	6	1	1	104.711	1	43	530.698	541.233	547.739	527.659	524.642	541.211	572.527	570.592	564.569
792	35	3	3	50480213			0	2	1	35	35	2	2	3	35	4	4	2	1	2	1	3	504801	1	35	0	3	1	2	4	1	5048	504802	50480101	16	1	1	104.711	1	43	582.014	542.468	527.863	550.608	528.66	502.816	520.264	501.943	570.852
792	35	3	3	50480214			0	2	1	35	35	2	2	3	35	4	4	2	2	2	3	4	504801	1	35	0	3	1	2	4	1	5048	504802	50480101	17	1	1	104.711	1	43	572.44	537.385	575.205	545.696	586.264	558.264	626.655	525.188	639.095
792	35	3	3	50480216			0	1	1	35	35	1	2	3	35	3	4	2	2	2	3	9	504801	1	35	0	3	1	2	4	1	5048	504802	50480101	18	1	1	104.711	1	43	581.294	599.014	586.727	603.881	570.484	515.554	565.47	616.542	618.714
792	35	3	3	50480221			0	1	1	35	35	1	2	3	35	4	4	2	1	1	3	1	504801	1	35	0	3	1	2	4	1	5048	504802	50480101	9	1	1	104.711	1	43	540.88	546.781	530.691	550.623	539.921	521.068	547.357	538.976	523.462
792	35	3	3	50480222			0	2	1	35	35	2	1	9	35	3	3	2	2	2	3	5	504801	1	35	0	3	1	2	4	1	5048	504802	50480101	12	1	1	104.711	1	43	506.589	524.21	581.385	490.453	552.109	534.804	510.199	534.031	495.238
792	35	3	3	50480223			1	2	1	35	35	2	1	2	35	3	4	2	2	2	3	5	504801	1	35	0	3	1	2	4	1	5048	504802	50480101	1	1	1	104.711	1	43	584.29	590.303	615.132	615.622	583.521	558.982	580.198	589.154	580.273
792	35	3	3	50480225			0	2	1	35	35	2	1	3	35	3	3	2	2	2	1	3	504801	1	35	0	3	1	2	4	1	5048	504802	50480101	14	1	1	104.711	1	43	678.683	729.697	669.504	652.783	632.09	576.091	638.795	667.367	633.699
792	35	3	3	50480226			0	2	1	35	35	2	1	3	35	2	2	2	2	1	3	2	504801	1	35	0	3	1	2	4	1	5048	504802	50480101	15	1	1	104.711	1	43	469.219	537.651	545.551	497.227	504.584	525.202	515.809	546.628	493.185
792	35	3	3	50480231			0	2	1	35	35	2	1	3				9					504801	1	35	0	3	1	2	4	1	5048	504802	50480101	4	1	1	104.711	1	43	610.562	608.332	583.794	514.115	564.472	615.876	579.504	589.414	566.952
792	35	3	3	50480501			0	2	1	35	35	2	2	1	35	3	3	2	2	1	4	4	504802	2	35	0	2	1	2	4	1	5048	504805	50480202	4	1	1	114.08	1	43	537.05	556.57	552.826	529.347	549.322	542.387	566.721	579.701	492.965
792	35	3	3	50480503			1	2	1	35	35	2	2	1	35	5	5	1	1	2	1	1	504802	2	35	0	2	1	2	4	1	5048	504805	50480202	10	1	1	114.08	1	43	617.341	660.549	686.868	600.889	594.759	517.59	617.081	591.548	604.388
792	35	3	3	50480504			1	2	1	35	35	2	1	3	35	4	4	1	1	1	1	1	504802	2	35	0	2	1	2	4	1	5048	504805	50480202	11	1	1	114.08	1	43	554.473	534.895	553.599	563.83	539.572	511.233	555.793	542.755	511.865
792	35	3	3	50480505			0	1	1	35	35	1	2	2	35	3	3	2	2	2	5	1	504802	2	35	0	2	1	2	4	1	5048	504805	50480202	12	1	1	114.08	1	43	603.124	576.8	557.197	553.607	549.294	601.009	517.493	592.903	614.279
792	35	3	3	50480506			1	1	1	35	35	1	1	3	35	1	4	1	2	3	2	1	504802	2	35	0	2	1	2	4	1	5048	504805	50480202	5	1	1	114.08	1	43	598.772	621.372	577.355	618.638	601.686	642.48	597.052	664.696	630.077
792	35	3	3	50480507			0	2	1	35	35	2	2	3	35	5	4	2	1	2	2	1	504802	2	35	0	2	1	2	4	1	5048	504805	50480202	6	1	1	114.08	1	43	555.01	567.354	532.273	560.279	501.688	507.308	573.577	522.354	528.508
792	35	3	3	50480508			1	2	1	35	35	2	2	2	35	5	5	2	1	1	3	2	504802	2	35	0	2	1	2	4	1	5048	504805	50480202	7	1	1	114.08	1	43	551.812	475.978	498.655	480.473	462.608	447.376	463.054	494.526	499.464
792	35	3	3	50480509			0	2	1	35	35	2	1	3	35	5	5	1	1	1	1	3	504802	2	35	0	2	1	2	4	1	5048	504805	50480202	8	1	1	114.08	1	43	582.461	597.758	567.158	606.694	537.019	635.168	624.213	584.005	592.387
792	35	3	3	50480510			1	1	1	35	35	1	1	3	35	2	4	2	2	2	1	9	504802	2	35	0	2	1	2	4	1	5048	504805	50480202	9	1	1	114.08	1	43	577.622	546.863	574.621	563.764	524.024	528.324	543.165	569.29	500.698
792	35	3	3	50480511			0	1	1	35	35	1	1	3	35	4	5	1	1	1	1	1	504802	2	35	0	2	1	2	4	1	5048	504805	50480202	1	1	1	114.08	1	43	614.063	607.786	680.057	636.083	628.609	590.226	619.1	615.402	619.325
792	35	3	3	50480512			1	1	1	35	35	1	1	3	35	3	4	2	2	2	3	4	504802	2	35	0	2	1	2	4	1	5048	504805	50480202	13	1	1	114.08	1	43	600.442	579.846	553.18	604.613	534.2	580.772	537.391	630.967	590.635
792	35	3	3	50480513			1	1	1	35	35	1	1	3	35	5	5	1	1	2	1	1	504802	2	35	0	2	1	2	4	1	5048	504805	50480202	2	1	1	114.08	1	43	654.522	653.865	665.697	682.335	673.959	622.935	702.847	625.051	626.522
792	35	3	3	50480514			0	1	1	35	35	1	1	3	35	5	5	1	1	2	1	1	504802	2	35	0	2	1	2	4	1	5048	504805	50480202	3	1	1	114.08	1	43	545.886	596.489	561.555	560.607	555.954	531.167	543.018	514.292	541.571
792	35	3	3	50480517			0	1	1	35	35	1	1	3	35	3	3	2	2	1	3	4	504802	2	35	0	2	1	2	4	1	5048	504805	50480202	15	1	1	114.08	1	43	636.549	561.232	621.093	610.871	575.817	622.671	622.509	578.48	638.464
792	35	3	3	50480519			0	1	1	35	35	1	1	3	35	3	3	2	2	3	1	9	504802	2	35	0	2	1	2	4	1	5048	504805	50480202	17	1	1	114.08	1	43	540.694	504.462	549.592	493.686	535.694	492.094	503.908	498.06	560.138
792	35	3	3	50480520			0	2	1	35	35	2	1	2				9					504802	2	35	0	2	1	2	4	1	5048	504805	50480202	5	1	1	114.08	1	43	614.722	591.38	610.323	562.441	605.529	626.168	600.526	591.694	611.81
792	35	3	3	50480521			0	1	1	35	35	1	2	3	35	3	3	1	1	1	1	1	504802	2	35	0	2	1	2	4	1	5048	504805	50480202	6	1	1	114.08	1	43	611.326	560.239	565.919	573.932	567.378	541.221	563.253	575.828	597.358
792	35	3	3	50480522			0	2	1	35	35	2	2	3				9					504802	2	35	0	2	1	2	4	1	5048	504805	50480202	18	1	1	114.08	1	43	472.966	463.024	486.211	440.992	499.805	466.62	444.026	467.723	432.793
792	35	3	3	50480525			0	1	1	35	35	1	1	2	35	4	4	2	1	2	1	3	504802	2	35	0	2	1	2	4	1	5048	504805	50480202	12	1	1	114.08	1	43	576.531	698.739	580.907	530.888	568.402	575.07	601.315	583.336	624.12
792	35	3	3	50480526			0	1	1	35	35	1	1	3	35	3	3	2	1	1	1	1	504802	2	35	0	2	1	2	4	1	5048	504805	50480202	7	1	1	114.08	1	43	513.93	572.96	541.261	524.615	532.453	585.493	563.789	553.489	549.319
792	35	2	4	50490101			0	2	1	35	35	2	1	2	35	1	2	3	3	3	4	5	504901	1	35	0	3	1	2	4	1	5049	504901	50490101	15	1	1	222.963	0	75	581.838	554.33	564.925	599.196	507.918	526.884	545.111	544.621	599.349
792	35	2	4	50490104			0	2	1	35	35	2	1	2	35	1	2	3	3	3	5	5	504901	1	35	0	3	1	2	4	1	5049	504901	50490101	16	1	1	222.963	0	75	393.87	467.919	432.761	494.336	489.359	437.378	448.593	431.091	466.456
792	35	2	4	50490105			1	2	1	35	35	2	1	2	35	1	2	3	3	3	5	5	504901	1	35	0	3	1	2	4	1	5049	504901	50490101	7	1	1	222.963	0	75	412.203	389.701	372.003	370.038	391.946	388.128	390.96	394.161	471.217
792	35	2	4	50490106			0	2	1	35	35	2	2	2	35	1	2	3	3	3	5	5	504901	1	35	0	3	1	2	4	1	5049	504901	50490101	17	1	1	222.963	0	75	384.895	350.72	383.586	414.129	398.665	381.864	424.562	342.403	419.612
792	35	2	4	50490107			0	1	1	35	35	1	1	1	35	2	3	3	3	3	5	5	504901	1	35	0	3	1	2	4	1	5049	504901	50490101	18	1	1	222.963	0	75	425.033	404.358	375.113	403.579	421.034	415.147	393.113	396.837	318.258
792	35	2	4	50490108			0	1	1	35	35	1	2	2	35	1	2	3	3	3	5	4	504901	1	35	0	3	1	2	4	1	5049	504901	50490101	8	1	1	222.963	0	75	278.979	334.16	378.194	254.015	410.17	349.779	272.744	254.108	325.658
792	35	2	4	50490109			0	2	1	35	35	2	1	3	35	1	2	2	3	3	4	2	504901	1	35	0	3	1	2	4	1	5049	504901	50490101	9	1	1	222.963	0	75	489.13	497.358	465.277	450.638	454.929	474.632	516.208	457.061	466.15
792	35	2	4	50490110			0	2	1	35	35	2	2	2	35	1	2	2	3	3	5	5	504901	1	35	0	3	1	2	4	1	5049	504901	50490101	1	1	1	222.963	0	75	454.09	485.568	437.257	485.605	419.299	440.882	427.977	430.389	458.716
792	35	2	4	50490111			0	2	1	35	35	2	1	2	35	1	2	3	3	3	5	5	504901	1	35	0	3	1	2	4	1	5049	504901	50490101	10	1	1	222.963	0	75	455.345	476.989	432.579	467.219	419.559	465.117	435.041	494.039	414.105
792	35	2	4	50490112			1	1	1	35	35	1	1	2	35	1	2	2	2	3	1	3	504901	1	35	0	3	1	2	4	1	5049	504901	50490101	11	1	1	222.963	0	75	472.094	467.904	383.446	446.451	453.851	434.095	399.703	430.907	456.81
792	35	2	4	50490113			0	2	1	35	35	2	1	2	35	1	2	2	3	3	5	2	504901	1	35	0	3	1	2	4	1	5049	504901	50490101	12	1	1	222.963	0	75	461.991	436.245	425.071	460.112	420.977	470.235	453.179	424.523	445.923
792	35	2	4	50490114			0	1	1	35	35	1	1	1	35	1	2	3	3	3	5	6	504901	1	35	0	3	1	2	4	1	5049	504901	50490101	2	1	1	222.963	0	75	363.556	423.766	422.338	377.626	427.835	415.314	415.674	490.015	427.17
792	35	2	4	50490115			1	2	1	35	35	2	2	3	35	1	2	2	3	3	5	5	504901	1	35	0	3	1	2	4	1	5049	504901	50490101	3	1	1	222.963	0	75	399.655	387.658	348.219	428.792	442.402	463.45	368.293	356.53	492.993
792	35	2	4	50490116			0	2	1	35	35	2	2	2	35	1	2	3	3	3	5	5	504901	1	35	0	3	1	2	4	1	5049	504901	50490101	4	1	1	222.963	0	75	254.801	301.845	309.392	285.268	285.893	285.604	264.193	211.445	311.611
792	35	2	4	50490117			0	1	1	35	35	1	1	2	35	1	2	3	3	3	5	5	504901	1	35	0	3	1	2	4	1	5049	504901	50490101	13	1	1	222.963	0	75	454	430.891	429.805	484.818	435.85	443.157	422.329	440.629	427.712
792	35	2	4	50490118			0	1	1	35	35	1	2	2	35	1	2	2	3	3	4	5	504901	1	35	0	3	1	2	4	1	5049	504901	50490101	14	1	1	222.963	0	75	399.52	388.299	415.115	403.588	418.426	369.569	363.515	358.314	311.787
792	35	2	4	50490119			0	2	1	35	35	2	1	2	35	1	2	3	3	3	5	5	504901	1	35	0	3	1	2	4	1	5049	504901	50490101	5	1	1	222.963	0	75	327.093	290.737	261.43	270.879	303.418	263.564	292.837	305.933	312.402
792	35	2	4	50490120			1	1	1	35	35	1	1	3	35	1	2	2	3	3	5	5	504901	1	35	0	3	1	2	4	1	5049	504901	50490101	15	1	1	222.963	0	75	331.709	331.79	282.436	340.01	300.576	356.678	279.708	316.118	326.039
792	35	2	4	50490121			1	2	1	35	35	2	2	2	35	1	2	3	3	3	5	5	504901	1	35	0	3	1	2	4	1	5049	504901	50490101	6	1	1	222.963	0	75	353.99	382.114	346.671	294.31	364.26	375.306	366.687	359.07	387.473
792	35	2	4	50490123			1	2	1	35	35	2	1	2	35	1	2	2	3	3	5	5	504901	1	35	0	3	1	2	4	1	5049	504901	50490101	17	1	1	222.963	0	75	401.221	381.317	430.336	442.474	380.945	494.673	354.173	402.198	411.222
792	35	2	4	50490124			0	2	1	35	35	2	2	2	35	1	2	2	3	3	4	5	504901	1	35	0	3	1	2	4	1	5049	504901	50490101	18	1	1	222.963	0	75	391.519	393.861	360.002	389.874	346.394	324.485	348.118	328.359	365.466
792	35	2	4	50490125			0	1	1	35	35	1	1	1	35	1	2	3	3	3	5	5	504901	1	35	0	3	1	2	4	1	5049	504901	50490101	7	1	1	222.963	0	75	390.508	378.184	391.244	370.432	337.986	419.026	385.193	341.984	330.122
792	35	2	4	50490127			1	1	1	35	35	1	1	2	35	1	2	3	3	3	5	5	504901	1	35	0	3	1	2	4	1	5049	504901	50490101	10	1	1	222.963	0	75	423.651	464.882	438.675	461.743	475.115	473.24	464.227	461.258	371.419
792	35	2	4	50490129			1	2	1	35	35	2	1	3	35	1	2	2	3	3	4	5	504901	1	35	0	3	1	2	4	1	5049	504901	50490101	9	1	1	222.963	0	75	435.917	464.744	478.22	483.881	418.52	466.047	392.901	439.085	456.576
792	35	2	4	50490130			1	2	1	35	35	2	1	2	35	1	2	3	3	3	5	5	504901	1	35	0	3	1	2	4	1	5049	504901	50490101	1	1	1	222.963	0	75	276.254	336.26	351.139	335.673	241.372	307.375	278.065	306.015	312.784
792	35	2	4	50490131			0	1	1	35	35	1	1	3	35	1	2	2	3	3	4	5	504901	1	35	0	3	1	2	4	1	5049	504901	50490101	2	1	1	222.963	0	75	334.382	377.236	354.576	388.34	383.869	299.793	358.542	364.845	359.01
792	35	4	1	50500401			0	1	1	35	35	1	1	3	35	1	1	2	3	3	4	5	505001	1	35	0	2	1	2	4	1	5050	505004	50500101	17	1	1	295.583	1	64	424.063	400.285	442.27	413.894	448.197	369.716	433.828	414.638	474.833
792	35	4	1	50500402			1	1	1	35	35	1	1	3	35	2	3	2	3	2	4	4	505001	1	35	0	2	1	2	4	1	5050	505004	50500101	9	1	1	295.583	1	64	421.462	442.898	452.935	417.937	457.086	458.153	426.401	419.509	425.433
792	35	4	1	50500403			0	2	1	35	35	2	1	2	35	1	1	3	3	3	5	5	505001	1	35	0	2	1	2	4	1	5050	505004	50500101	18	1	1	295.583	1	64	466.842	483.045	434.839	458.004	518.516	494.336	411.262	446.233	453.619
792	35	4	1	50500404			0	1	1	35	35	1	3	3	35	1	1	3	3	3	5	5	505001	1	35	0	2	1	2	4	1	5050	505004	50500101	1	1	1	295.583	1	64	271.288	285.395	306.247	297.754	306.818	345.289	319.271	360.091	370.519
792	35	4	1	50500405			0	1	1	35	35	1	2	2	35	1	9	3	3	3	5	5	505001	1	35	0	2	1	2	4	1	5050	505004	50500101	2	1	1	295.583	1	64	387.41	365.309	340.138	360.041	369.221	418.144	368.848	305.929	335.113
792	35	4	1	50500406			0	2	1	35	35	2	1	3	35	1	1	3	3	3	5	5	505001	1	35	0	2	1	2	4	1	5050	505004	50500101	10	1	1	295.583	1	64	366.255	371.154	359.479	389.081	403.196	328.571	331.667	365.817	371.941
792	35	4	1	50500407			0	1	1	35	35	1	2	1	35	1	1	3	3	3	5	5	505001	1	35	0	2	1	2	4	1	5050	505004	50500101	11	1	1	295.583	1	64	397.259	402.543	413.825	429.647	394.038	342.658	400.305	411.199	417.545
792	35	4	1	50500408			1	1	1	35	35	1	1	2	35	3	2	2	2	2	4	3	505001	1	35	0	2	1	2	4	1	5050	505004	50500101	12	1	1	295.583	1	64	384.387	384.905	351.166	396.137	431.09	348.364	368.823	380.955	399.596
792	35	4	1	50500409			0	2	1	35	35	2	2	1	35	1	2	2	3	3	4	4	505001	1	35	0	2	1	2	4	1	5050	505004	50500101	13	1	1	295.583	1	64	209.003	278.505	211.977	282.698	252.353	179.644	290.539	240.912	172.945
792	35	4	1	50500410			0	1	1	35	35	1	2	2	35	1	1	3	3	3	5	5	505001	1	35	0	2	1	2	4	1	5050	505004	50500101	3	1	1	295.583	1	64	372.004	347.466	345.517	401.581	393.828	292.756	340.803	429.05	392.624
792	35	4	1	50500411			0	2	1	35	35	2	1	3	35	1	1	3	3	3	5	5	505001	1	35	0	2	1	2	4	1	5050	505004	50500101	4	1	1	295.583	1	64	246.185	308.46	230.663	290.321	242.033	327.132	381.434	240.157	181.603
792	35	4	1	50500412			0	1	1	35	35	1	9	2	35	1	1	3	3	3	4	5	505001	1	35	0	2	1	2	4	1	5050	505004	50500101	5	1	1	295.583	1	64	318.839	326.471	244.545	289.922	308.962	261.212	241.779	308.989	295.986
792	35	4	1	50500413			1	1	1	35	35	1	2	2	35	1	1	3	3	3	5	5	505001	1	35	0	2	1	2	4	1	5050	505004	50500101	14	1	1	295.583	1	64	432.069	381.777	379.991	375.757	397.918	368.159	319.26	359.02	353.553
792	35	4	1	50500415			0	2	1	35	35	2	2	2	35	1	1	3	3	3	4	5	505001	1	35	0	2	1	2	4	1	5050	505004	50500101	15	1	1	295.583	1	64	403.975	420.536	408.821	424.294	470.876	415.489	462.976	407.588	439.259
792	35	4	1	50500416			0	1	1	35	35	1	2	2	35	2	4	2	2	2	3	4	505001	1	35	0	2	1	2	4	1	5050	505004	50500101	16	1	1	295.583	1	64	380.325	377.628	413.302	366.62	337.891	344.537	328.619	335.912	330.395
792	35	4	1	50500417			1	1	1	35	35	1	3	1	35	2	4	2	2	2	3	2	505001	1	35	0	2	1	2	4	1	5050	505004	50500101	17	1	1	295.583	1	64	246.071	303.457	312.35	300.219	308.229	273.514	252.509	319.601	290.682
792	35	4	1	50500418			0	1	1	35	35	1	2	3	35	2	2	2	3	3	4	4	505001	1	35	0	2	1	2	4	1	5050	505004	50500101	7	1	1	295.583	1	64	320.828	375.691	273.077	304.721	345.405	393.77	304.388	365.495	280.771
792	35	4	1	50500419			0	2	1	35	35	2	2	9	35	1	1	3	3	3	4	5	505001	1	35	0	2	1	2	4	1	5050	505004	50500101	14	1	1	295.583	1	64	351.869	364.281	339.651	371.616	383.731	334.268	388.621	365.532	386.395
792	35	4	1	50500421			0	1	1	35	35	1	9	1	35	2	2	3	3	3	4	5	505001	1	35	0	2	1	2	4	1	5050	505004	50500101	8	1	1	295.583	1	64	349.415	406.944	335.582	413.076	283.685	348.62	259.695	341.12	296.258
792	35	4	1	50500422			0	2	1	35	35	2	1	2				9					505001	1	35	0	2	1	2	4	1	5050	505004	50500101	9	1	1	295.583	1	64	482.289	483.015	407.295	481.066	468.643	468.672	401.956	463.034	456.061
792	35	4	1	50500423			0	2	1	35	35	2	2	1	35	1	1	3	3	3	5	5	505001	1	35	0	2	1	2	4	1	5050	505004	50500101	1	1	1	295.583	1	64	442.974	386.338	396.449	402.964	450.202	462.327	491.822	418.886	435.203
792	35	4	1	50500424			1	2	1	35	35	2	2	2	35	1	1	3	3	3	5	5	505001	1	35	0	2	1	2	4	1	5050	505004	50500101	2	1	1	295.583	1	64	536.986	576.008	517.186	553.875	519.598	465.111	527.316	485.286	465.825
792	35	4	1	50500425			1	2	1	35	35	2	1	1	35	1	1	3	3	3	4	5	505001	1	35	0	2	1	2	4	1	5050	505004	50500101	10	1	1	295.583	1	64	559.513	518.42	544.129	456.209	540.78	494.941	516.723	457.557	495.75
792	35	4	1	50510502			0	2	1	35	35	2	2	3	35	3	1	2	2	2	3	3	505101	1	35	0	2	1	2	4	1	5051	505105	50510101	5	1	1	108.695	0	54	353.473	437.835	404.369	440.94	370.849	360.67	412.906	431.129	384.978
792	35	4	1	50510503			1	1	1	35	35	1	2	2	35	2	2	2	3	3	5	4	505101	1	35	0	2	1	2	4	1	5051	505105	50510101	6	1	1	108.695	0	54	476.958	514.178	531.333	484.381	532.269	500.509	489.066	483.583	537.516
792	35	4	1	50510504			0	1	1	35	35	1	1	2	35	2	2	2	3	3	5	6	505101	1	35	0	2	1	2	4	1	5051	505105	50510101	7	1	1	108.695	0	54	434.308	478.4	440.666	438.071	465.749	477.128	484.702	446.857	462.711
792	35	4	1	50510505			0	1	1	35	35	1	1	2	35	2	2	2	2	2	3	3	505101	1	35	0	2	1	2	4	1	5051	505105	50510101	17	1	1	108.695	0	54	605.365	550.503	542.886	615.935	551.809	598.331	543.924	576.346	590.757
792	35	4	1	50510506			0	2	1	35	35	2	2	3	35	1	1	3	3	2	5	6	505101	1	35	0	2	1	2	4	1	5051	505105	50510101	18	1	1	108.695	0	54	491.305	551.714	528.354	528.081	524.49	510.498	483.249	560.67	528.393
792	35	4	1	50510507			1	1	1	35	35	1	1	2	35	2	3	2	2	2	2	3	505101	1	35	0	2	1	2	4	1	5051	505105	50510101	8	1	1	108.695	0	54	459.598	445.833	436.954	382.624	443.736	431.734	393.627	406.708	406.322
792	35	4	1	50510508			1	2	1	35	35	2	1	1	35	1	1	3	3	3	5	5	505101	1	35	0	2	1	2	4	1	5051	505105	50510101	10	1	1	108.695	0	54	399.661	429.299	455.438	427.293	404.327	414.517	412.542	449.197	425.912
792	35	4	1	50510509			0	2	1	35	35	2	1	2	35	3	3	2	2	3	1	6	505101	1	35	0	2	1	2	4	1	5051	505105	50510101	9	1	1	108.695	0	54	498.907	500.268	485.255	513.73	485.658	514.4	490.87	502.021	482.152
792	35	4	1	50510510			0	1	1	35	35	1	1	3	35	2	2	2	3	2	3	5	505101	1	35	0	2	1	2	4	1	5051	505105	50510101	1	1	1	108.695	0	54	350.379	380.643	392.048	380.479	450.745	252.587	406.311	390.884	381.264
792	35	4	1	50510511			0	2	1	35	35	2	2	9	35	2	2	2	3	3	5	5	505101	1	35	0	2	1	2	4	1	5051	505105	50510101	2	1	1	108.695	0	54	377.39	340.355	315.066	259.545	275.178	350.837	260.142	374.709	398.819
792	35	4	1	50510512			0	1	1	35	35	1	3	3	35	2	2	2	2	1	2	2	505101	1	35	0	2	1	2	4	1	5051	505105	50510101	3	1	1	108.695	0	54	340.527	372.227	361.704	378.561	355.713	399.352	327.026	357.716	434.863
792	35	4	1	50510513			1	2	1	35	35	2	3	2	35	5	4	2	1	1	1	4	505101	1	35	0	2	1	2	4	1	5051	505105	50510101	11	1	1	108.695	0	54	454.826	449.504	484.362	460.865	477.577	504.73	494.893	481.317	504.936
792	35	4	1	50510514			0	1	1	35	35	1	1	3	35	3	3	2	2	1	2	4	505101	1	35	0	2	1	2	4	1	5051	505105	50510101	12	1	1	108.695	0	54	554.419	584.419	526.731	561.736	524.293	513.204	547.024	554.442	580.237
792	35	4	1	50510515			1	2	1	35	35	2	2	2	35	2	2	2	3	3	5	3	505101	1	35	0	2	1	2	4	1	5051	505105	50510101	13	1	1	108.695	0	54	425.91	424.791	395.665	411.564	376.195	410.494	401.635	412.123	454.501
792	35	4	1	50510518			1	2	1	35	35	2	2	2	35	2	2	2	3	2	3	6	505101	1	35	0	2	1	2	4	1	5051	505105	50510101	4	1	1	108.695	0	54	521.044	550.026	504.202	534.138	526.574	565.628	533.411	516.598	525.535
792	35	4	1	50510519			1	2	1	35	35	2	1	1	35	4	5	2	2	1	3	6	505101	1	35	0	2	1	2	4	1	5051	505105	50510101	5	1	1	108.695	0	54	551.939	549.735	552.703	565.629	557.268	608.189	581.161	588.446	583.443
792	35	4	1	50510520			0	1	1	35	35	1	1	9	35	3	3	2	3	1	5	6	505101	1	35	0	2	1	2	4	1	5051	505105	50510101	14	1	1	108.695	0	54	365.595	444.132	384.701	414.386	468.969	441.24	347.203	450.886	392.064
792	35	4	1	50510521			0	1	1	35	35	1	1	3	35	3	3	2	2	2	3	4	505101	1	35	0	2	1	2	4	1	5051	505105	50510101	15	1	1	108.695	0	54	441.33	423.952	442.836	464.844	441.113	366.463	436.219	454.236	392.822
792	35	4	1	50510522			0	2	1	35	35	2	2	2	35	2	2	3	3	2	4	4	505101	1	35	0	2	1	2	4	1	5051	505105	50510101	6	1	1	108.695	0	54	481.382	452.11	477.057	485.45	479.399	460.471	460.457	484.788	490.99
792	35	4	1	50510523			0	1	1	35	35	1	1	2	35	5	4	2	1	2	3	2	505101	1	35	0	2	1	2	4	1	5051	505105	50510101	16	1	1	108.695	0	54	522.202	500.398	485.074	526.08	484.012	525.054	544.551	504.169	533.378
792	35	4	1	50510524			0	2	1	35	35	2	3	3	35	3	4	9	1	3	6	7	505101	1	35	0	2	1	2	4	1	5051	505105	50510101	7	1	1	108.695	0	54	430.62	477.534	442.521	391.9	453.761	506.838	475.325	465.672	474.779
792	35	4	1	50510525			1	2	1	35	35	2	2	2	35	4	3	2	2	2	3	7	505101	1	35	0	2	1	2	4	1	5051	505105	50510101	17	1	1	108.695	0	54	479.578	479.768	498.991	493.196	457.017	473.643	497.542	499.454	480.534
792	35	4	1	50510526			0	2	1	35	35	2	2	2	35	2	2	2	3	3	5	4	505101	1	35	0	2	1	2	4	1	5051	505105	50510101	8	1	1	108.695	0	54	400.031	381.453	392.278	368.661	410.508	404.09	340.964	386.44	416.554
792	35	4	1	50510528			0	1	1	35	35	1	1	2	35	4	3	2	1	1	1	1	505101	1	35	0	2	1	2	4	1	5051	505105	50510101	1	1	1	108.695	0	54	538.94	574.502	508.25	526.987	483.497	557.888	533.181	536.831	522.939
792	35	4	1	50510529			1	2	1	35	35	2	1	3	35	3	4	2	2	2	4	6	505101	1	35	0	2	1	2	4	1	5051	505105	50510101	2	1	1	108.695	0	54	482.238	485.687	453.512	514.901	470.93	509.426	506.092	500.004	459.387
792	35	4	1	50510530			1	2	1	35	35	2	1	2	35	1	1	2	2	2	1	7	505101	1	35	0	2	1	2	4	1	5051	505105	50510101	18	1	1	108.695	0	54	426.655	381.523	418.896	399.035	386.611	410.45	343.612	389.572	376.422
792	35	4	1	50510531			0	1	1	35	35	1	3	2	35	3	3	2	3	3	5	6	505101	1	35	0	2	1	2	4	1	5051	505105	50510101	3	1	1	108.695	0	54	374.956	340.232	396.449	388.201	434.781	416.665	447.074	330.599	339.822
792	35	4	1	50510532			0	1	1	35	35	1	1	3	35	4	3	2	2	1	1	3	505101	1	35	0	2	1	2	4	1	5051	505105	50510101	10	1	1	108.695	0	54	580.374	550.764	511.81	505.213	557.391	495.594	544.542	554.335	548.538
792	35	4	1	50510533			0	1	1	35	35	1	1	1	35	2	2	3	3	3	5	6	505101	1	35	0	2	1	2	4	1	5051	505105	50510101	11	1	1	108.695	0	54	493.114	492.076	516.644	492.712	517.431	469.025	477.352	468.78	477.736
792	35	4	1	50510534			0	1	1	35	35	1	2	1	35	1	1	3	3	3	5	5	505101	1	35	0	2	1	2	4	1	5051	505105	50510101	12	1	1	108.695	0	54	362.642	387.769	329.098	362.562	312.625	385.05	306.539	388.416	334.186
792	35	4	1	50510536			0	2	1	35	35	2	2	3	35	3	2	2	3	2	5	4	505101	1	35	0	2	1	2	4	1	5051	505105	50510101	13	1	1	108.695	0	54	465.287	480.807	409.148	431.742	429.854	411.452	470.971	459.14	459.637
792	35	4	1	50510537			1	1	1	35	35	1	2	2	35	5	3	2	2	2	2	3	505101	1	35	0	2	1	2	4	1	5051	505105	50510101	14	1	1	108.695	0	54	449.808	402.803	400.37	421.444	407.232	418.279	427.398	405.916	416.264
792	35	4	1	50510538			0	2	1	35	35	2	1	2	35	4	4	2	2	3	4	5	505101	1	35	0	2	1	2	4	1	5051	505105	50510101	5	1	1	108.695	0	54	561.492	493.378	546.532	527.443	536.897	516.738	564.536	526.303	554.837
792	35	4	1	50510539			0	2	1	35	35	2	3	3	35	5	3	2	2	2	3	2	505101	1	35	0	2	1	2	4	1	5051	505105	50510101	15	1	1	108.695	0	54	422.99	477.21	446.681	515.399	474.668	450.068	431.177	426.743	466.588
792	35	4	1	50510540			1	2	1	35	35	2	2	2	35	3	4	2	2	2	3	5	505101	1	35	0	2	1	2	4	1	5051	505105	50510101	16	1	1	108.695	0	54	465.257	466.873	479.508	425.209	430.015	435.064	483.597	400.745	453.468
792	35	4	1	50510541			0	2	1	35	35	2	1	2	35	3	3	2	2	1	3	4	505101	1	35	0	2	1	2	4	1	5051	505105	50510101	6	1	1	108.695	0	54	530.712	496.008	432.523	498.94	459.58	456.255	464.328	451.425	471.676
792	35	4	1	50510542			0	1	1	35	35	1	1	2	35	2	1	2	2	2	3	2	505101	1	35	0	2	1	2	4	1	5051	505105	50510101	17	1	1	108.695	0	54	578.216	647.583	510.728	571.293	547.28	545.175	513.961	536.326	576.967
792	35	4	1	50510543			0	2	1	35	35	2	1	3	35	1	1	2	3	3	5	5	505101	1	35	0	2	1	2	4	1	5051	505105	50510101	18	1	1	108.695	0	54	476.017	548.439	532.965	514.645	465.198	542.145	619.092	544.301	493.607
792	35	4	1	50511101			0	2	1	35	35	2	2	2	35	3	2	2	3	3	4	5	505102	2	35	0	3	1	2	4	1	5051	505111	50510202	10	1	1	125.164	0	54	336.103	359.314	320.562	351.85	316.556	354.209	328.575	342.864	366.771
792	35	4	1	50511102			1	2	1	35	35	2	1	3	35	3	3	2	2	2	5	3	505102	2	35	0	3	1	2	4	1	5051	505111	50510202	7	1	1	125.164	0	54	548.298	557.831	586.724	599.094	551.159	548.351	547.189	528.641	584.51
792	35	4	1	50511103			0	2	1	35	35	2	1	2	35	4	2	2	2	2	4	1	505102	2	35	0	3	1	2	4	1	5051	505111	50510202	11	1	1	125.164	0	54	643.839	612.281	629.775	584.231	638.556	669.459	601.984	515.676	569.654
792	35	4	1	50511104			0	1	1	35	35	1			35	3	2	9	3	3	4	5	505102	2	35	0	3	1	2	4	1	5051	505111	50510202	8	1	1	125.164	0	54	392.761	409.243	443.518	381.183	378.064	349.558	403.924	428.669	404.542
792	35	4	1	50511105			0	1	1	35	35	1	2	3				9					505102	2	35	0	3	1	2	4	1	5051	505111	50510202	12	1	1	125.164	0	54	469.358	481.481	524.478	494.165	500.234	465.999	450.371	539.172	446.71
792	35	4	1	50511106			1	2	1	35	35	2	3	2	35	1	1	2	3	2	5	9	505102	2	35	0	3	1	2	4	1	5051	505111	50510202	13	1	1	125.164	0	54	499.6	484.687	518.601	527.348	485.452	551.331	512.034	495.123	404.682
792	35	4	1	50511107			0	1	1	35	35	1	9	3				9					505102	2	35	0	3	1	2	4	1	5051	505111	50510202	14	1	1	125.164	0	54	498.035	437.429	448.08	492.411	457.37	499.785	486.276	486.603	461.338
792	35	4	1	50511108			1	1	1	35	35	1	9	1	35	3	3	2	3	1	5	5	505102	2	35	0	3	1	2	4	1	5051	505111	50510202	9	1	1	125.164	0	54	410.857	433.739	409.63	454.969	430.451	441.116	436.454	399.043	397.915
792	35	4	1	50511110			1	1	1	35	35	1	1	2				9					505102	2	35	0	3	1	2	4	1	5051	505111	50510202	15	1	1	125.164	0	54	524.043	465.456	488.156	523.41	519.175	485.995	480.476	462.243	487.001
792	35	4	1	50511111			0	1	1	35	35	1	9	2	35	2	1	2	3	3	5	2	505102	2	35	0	3	1	2	4	1	5051	505111	50510202	2	1	1	125.164	0	54	444.071	428.751	381.684	428.726	458.268	423.345	393.6	447.926	430.766
792	35	4	1	50511112			0	1	1	35	35	1	9	2	35	4	2	2	2	1	2	3	505102	2	35	0	3	1	2	4	1	5051	505111	50510202	3	1	1	125.164	0	54	532.666	504.139	480.872	510.693	489.117	565.421	554.049	531.959	571.154
792	35	4	1	50511113			0	2	1	35	35	2	1	1	35	2	4	2	2	2	1	3	505102	2	35	0	3	1	2	4	1	5051	505111	50510202	4	1	1	125.164	0	54	617.219	597.154	590.32	589.323	551.428	570.465	621.974	565.667	606.657
792	35	4	1	50511115			0	2	1	35	35	2	2	1	35	2	2	3	3	3	5	6	505102	2	35	0	3	1	2	4	1	5051	505111	50510202	16	1	1	125.164	0	54	361.678	292.016	262.982	308.75	305.086	360.52	272.626	353.64	304.922
792	35	4	1	50511117			1	2	1	35	35	2	1	2				9					505102	2	35	0	3	1	2	4	1	5051	505111	50510202	17	1	1	125.164	0	54	529.957	529.636	511.174	495.82	513.672	501.975	524.519	527.989	504.237
792	35	4	1	50511118			0	1	1	35	35	1	2	3	35	3	4	2	1	2	2	1	505102	2	35	0	3	1	2	4	1	5051	505111	50510202	7	1	1	125.164	0	54	399.62	473.349	462.164	450.799	422.129	466.783	416.365	394.593	421.071
792	35	4	1	50511119			1	2	1	35	35	2	2	2	35	3	2	2	3	2	5	3	505102	2	35	0	3	1	2	4	1	5051	505111	50510202	8	1	1	125.164	0	54	492.951	520.481	506.074	474.81	455.393	504.127	484.847	501.086	546.094
792	35	4	1	50511120			0	2	1	35	35	2	1	1	35	2	2	3	3	3	4	5	505102	2	35	0	3	1	2	4	1	5051	505111	50510202	18	1	1	125.164	0	54	596.149	599.531	546.265	594.346	566.687	594.725	562.089	569.535	614.95
792	35	4	1	50511123			1	2	1	35	35	2	1	3	35	3	3	2	2	1	2	3	505102	2	35	0	3	1	2	4	1	5051	505111	50510202	10	1	1	125.164	0	54	515.557	619.394	555.625	564.572	518.034	488.445	590.267	558.204	523.136
792	35	4	1	50511125			0	2	1	35	35	2	1	2	35	2	3	2	2	2	3	4	505102	2	35	0	3	1	2	4	1	5051	505111	50510202	11	1	1	125.164	0	54	507.782	509.338	570.086	518.369	461.622	540.424	555.802	544.855	552.782
792	35	4	1	50511126			1	2	1	35	35	2	1	2	35	3	3	2	2	2	3	5	505102	2	35	0	3	1	2	4	1	5051	505111	50510202	2	1	1	125.164	0	54	343.499	340.977	398.304	395.15	340.901	341.051	313.448	365.063	364.48
792	35	4	1	50511127			1	1	1	35	35	1	1	1	35	3	3	2	2	1	5	3	505102	2	35	0	3	1	2	4	1	5051	505111	50510202	12	1	1	125.164	0	54	622.842	562.712	591.295	609.654	626.624	547.639	554.391	666.121	690.294
792	35	4	1	50511129			0	2	1	35	35	2	1	3	35	3	2	2	2	3	1	3	505102	2	35	0	3	1	2	4	1	5051	505111	50510202	13	1	1	125.164	0	54	570.144	609.481	531.203	542.758	574.617	552.412	627.417	656.642	570.805
792	35	4	1	50511130			0	2	1	35	35	2	1	3	35	3	3	2	2	2	3	5	505102	2	35	0	3	1	2	4	1	5051	505111	50510202	14	1	1	125.164	0	54	613.551	570.205	595.494	608.407	587.311	553.226	554.278	582.91	572.999
792	35	4	1	50511131			0	1	1	35	35	1	1	2	35	2	3	2	2	2	9	6	505102	2	35	0	3	1	2	4	1	5051	505111	50510202	15	1	1	125.164	0	54	505.405	462.573	397.777	470.646	496.949	460.911	480.784	496.579	453.044
792	35	4	1	50511132			0	2	1	35	35	2	2	1	35	2	2	2	3	3	4	5	505102	2	35	0	3	1	2	4	1	5051	505111	50510202	16	1	1	125.164	0	54	365.335	351.723	299.196	312.272	293.938	365.13	345.487	382.402	319.184
792	35	4	1	50511135			0	1	1	35	35	1	1	3	35	3	2	2	2	3	3	3	505102	2	35	0	3	1	2	4	1	5051	505111	50510202	17	1	1	125.164	0	54	451.395	448.352	471.518	561.96	480.166	555.075	543.317	532.467	533.361
792	35	4	1	50511136			0	1	1	35	35	1	2	3	35	2	1	3	3	3	5	5	505102	2	35	0	3	1	2	4	1	5051	505111	50510202	6	1	1	125.164	0	54	380.695	421.481	350.69	378.985	383.078	426.525	364.743	426.548	395.707
792	35	4	1	50511137			1	1	1	35	35	1	9	1	35	3	3	2	2	2	4	5	505102	2	35	0	3	1	2	4	1	5051	505111	50510202	18	1	1	125.164	0	54	450.523	496.505	463.406	439.85	497.973	448.238	463.957	452.944	498.047
792	35	4	1	50511138			0	2	1	35	35	2	2	1	35	2	2	3	3	2	4	6	505102	2	35	0	3	1	2	4	1	5051	505111	50510202	10	1	1	125.164	0	54	377.874	325.13	360.423	321.927	350.721	331.175	301.4	347.478	338.536
792	35	4	1	50511139			1	2	1	35	35	2	2	2	35	2	2	2	2	2	3	3	505102	2	35	0	3	1	2	4	1	5051	505111	50510202	11	1	1	125.164	0	54	515.53	508.779	450.779	486.504	534.047	522.634	532.017	491.308	546.22
792	35	4	1	50511140			0	2	1	35	35	2	1	3	35	5	5	2	1	1	1	3	505102	2	35	0	3	1	2	4	1	5051	505111	50510202	7	1	1	125.164	0	54	439.005	389.412	402.547	430.748	453.62	444.445	466.864	357.974	378.631
792	35	4	1	50511141			0	1	1	35	35	1	1	2	35	3	2	2	2	2	3	2	505102	2	35	0	3	1	2	4	1	5051	505111	50510202	8	1	1	125.164	0	54	500.423	460.255	483.381	479.729	455.441	432.353	434.475	514.356	408.292
792	35	4	1	50511142			0	1	1	35	35	1	2	3	35	2	1	2	3	3	3	5	505102	2	35	0	3	1	2	4	1	5051	505111	50510202	9	1	1	125.164	0	54	553.547	534.513	497.365	547.217	528.163	530.676	505.354	510.551	490.373
792	35	3	1	50520301			0	1	1	35	35	1	1	2	35	3	3	2	2	1	3	3	505201	1	35	0	3	1	2	4	1	5052	505203	50520101	17	1	1	117.604	0	70	526.442	554.5	516.592	555.23	543.847	593.322	575.281	519.661	573.647
792	35	3	1	50520302			0	1	1	35	35	1	1	2	35	3	4	2	2	1	4	2	505201	1	35	0	3	1	2	4	1	5052	505203	50520101	18	1	1	117.604	0	70	512.117	547.121	565.287	527.584	583.106	589.885	526.653	556.815	609.64
792	35	3	1	50520303			1	2	1	35	35	2	1	3	35	2	4	2	2	2	3	5	505201	1	35	0	3	1	2	4	1	5052	505203	50520101	10	1	1	117.604	0	70	519.33	471.353	462.992	517.97	552.043	450.877	554.995	507.481	478.079
792	35	3	1	50520304			0	2	1	35	35	2	2	2	35	2	3	2	3	1	5	3	505201	1	35	0	3	1	2	4	1	5052	505203	50520101	7	1	1	117.604	0	70	517.809	518.295	512.959	511.426	467.993	549.758	541.01	477.985	470.869
792	35	3	1	50520305			0	1	1	35	35	1	1	2	35	5	5	2	1	1	3	3	505201	1	35	0	3	1	2	4	1	5052	505203	50520101	8	1	1	117.604	0	70	584.517	503.896	570.216	564.359	577.543	572.776	559.352	494.332	558.27
792	35	3	1	50520306			0	1	1	35	35	1	1	2	35	1	3	2	2	1	3	3	505201	1	35	0	3	1	2	4	1	5052	505203	50520101	11	1	1	117.604	0	70	603.174	587.157	594.524	582.046	622.124	615.265	590.779	575.035	601.245
792	35	3	1	50520307			0	2	1	35	35	2	2	2	35	4	3	2	1	1	2	1	505201	1	35	0	3	1	2	4	1	5052	505203	50520101	12	1	1	117.604	0	70	484.09	439.678	432.16	477.609	548.668	506.421	482.16	489.028	442.71
792	35	3	1	50520308			0	2	1	35	35	2	1	3	35	2	2	2	3	2	3	5	505201	1	35	0	3	1	2	4	1	5052	505203	50520101	9	1	1	117.604	0	70	488.239	448.64	494.228	487.134	509.394	478.709	460.375	459.367	456.572
792	35	3	1	50520309			1	2	1	35	35	2	1	9	35	4	9	2	2	2	2	3	505201	1	35	0	3	1	2	4	1	5052	505203	50520101	1	1	1	117.604	0	70	458.216	408.106	457.47	498.915	457.27	450.41	508.683	436.812	447.148
792	35	3	1	50520310			0	1	1	35	35	1	1	2	35	3	3	2	3	1	5	5	505201	1	35	0	3	1	2	4	1	5052	505203	50520101	2	1	1	117.604	0	70	611.162	570.914	573.969	575.128	598.311	547.281	540.571	590.039	577.702
792	35	3	1	50520311			1	1	1	35	35	1	1	3	35	3	4	2	2	1	5	4	505201	1	35	0	3	1	2	4	1	5052	505203	50520101	3	1	1	117.604	0	70	474.019	496.114	393.204	485.915	486.741	537.958	471.266	471.714	532.568
792	35	3	1	50520312			0	1	1	35	35	1	1	2	35	3	3	2	2	1	3	3	505201	1	35	0	3	1	2	4	1	5052	505203	50520101	13	1	1	117.604	0	70	529.619	475.35	472.012	478.742	550.798	470.245	495.83	455.884	514.244
792	35	3	1	50520313			1	1	1	35	35	1	2	3	35	4	4	2	2	2	5	4	505201	1	35	0	3	1	2	4	1	5052	505203	50520101	4	1	1	117.604	0	70	486.337	518.968	441.778	429.908	436.753	425.117	455.345	490.599	452.203
792	35	3	1	50520314			1	1	1	35	35	1	2	2	35	1	4	2	2	1	2	3	505201	1	35	0	3	1	2	4	1	5052	505203	50520101	14	1	1	117.604	0	70	519.395	580.544	495.485	528.268	552.17	491.11	518.035	534.765	520.713
792	35	3	1	50520315			0	1	1	35	35	1	1	2	35	2	3	2	2	1	4	3	505201	1	35	0	3	1	2	4	1	5052	505203	50520101	5	1	1	117.604	0	70	523.497	581.012	531.251	532.964	546.285	564.119	534.836	533.837	543.73
792	35	3	1	50520316			1	1	1	35	35	1	1	2	35	3	4	2	2	1	3	2	505201	1	35	0	3	1	2	4	1	5052	505203	50520101	6	1	1	117.604	0	70	588.479	541.858	547.16	524.542	554.897	597.747	566.451	583.179	551.48
792	35	3	1	50520317			1	2	1	35	35	2	1	3	35	4	4	2	2	1	5	3	505201	1	35	0	3	1	2	4	1	5052	505203	50520101	15	1	1	117.604	0	70	524.663	524.968	513.886	588.809	499.607	547	523.991	597.077	483.967
792	35	3	1	50520318			1	1	1	35	35	1	1	2	35	3	4	2	2	1	5	4	505201	1	35	0	3	1	2	4	1	5052	505203	50520101	7	1	1	117.604	0	70	596.773	552.522	566.449	544.516	576.319	557.909	580.914	563.652	560.751
792	35	3	1	50520320			0	1	2	35	35	1	1	2	35	4	4	2	2	2	5	9	505201	1	35	0	3	1	2	4	1	5052	505203	50520101	16	1	1	117.604	0	70	485.193	465.087	523.204	508.256	470.827	508.289	517.228	440.481	487.965
792	35	3	1	50520321			0	1	2	35	35	1	1	2	35	3	5	2	2	1	3	2	505201	1	35	0	3	1	2	4	1	5052	505203	50520101	17	1	1	117.604	0	70	557.289	586.312	515.997	611.381	546.045	547.051	594.44	566.75	584.681
792	35	3	1	50520322			1	2	2	35	35	2	1	2	35	2	5	2	2	2	3	5	505201	1	35	0	3	1	2	4	1	5052	505203	50520101	18	1	1	117.604	0	70	634.321	578.44	591.058	521.579	539.92	507.587	498.196	565.052	567.752
792	35	3	1	50520323			0	2	2	35	35	2	1	2	35	2	3	2	2	2	3	3	505201	1	35	0	3	1	2	4	1	5052	505203	50520101	9	1	1	117.604	0	70	625.258	656.904	623.163	620.665	640.449	594.455	586.535	627.442	620.344
792	35	3	1	50520324			0	2	2	35	35	2	2	9	35	3	2	2	2	9	9	2	505201	1	35	0	3	1	2	4	1	5052	505203	50520101	1	1	1	117.604	0	70	541.853	585.501	506.475	500.394	491.024	532.487	498.559	551.985	519.176
792	35	3	1	50520325			0	2	2	35	35	2	1	3	35	3	3	2	2	1	3	3	505201	1	35	0	3	1	2	4	1	5052	505203	50520101	10	1	1	117.604	0	70	582.808	484.606	566.406	512.552	510.823	488	483.8	568.557	574.323
792	35	3	1	50520326			0	1	2	35	35	1	1	2	35	4	4	2	2	2	3	2	505201	1	35	0	3	1	2	4	1	5052	505203	50520101	2	1	1	117.604	0	70	519.78	508.211	527.424	523.836	516.771	504.247	539.089	504.537	525.311
792	35	3	1	50520327			0	2	2	35	35	2	1	2	35	1	2	2	2	2	1	2	505201	1	35	0	3	1	2	4	1	5052	505203	50520101	11	1	1	117.604	0	70	570.07	515.191	575.419	576.265	523.148	526.401	523.811	484.119	533.108
792	35	3	1	50520328			1	1	2	35	35	1	1	2	35	1	4	2	3	1	4	5	505201	1	35	0	3	1	2	4	1	5052	505203	50520101	12	1	1	117.604	0	70	557.737	505.578	506.169	526.499	554.11	568.732	522.069	526.771	500.528
792	35	3	1	50520329			0	1	2	35	35	1	1	2	35	3	4	2	1	2	1	1	505201	1	35	0	3	1	2	4	1	5052	505203	50520101	3	1	1	117.604	0	70	606.091	549.485	645.103	625.222	591.705	604.056	594.169	584.776	556.914
792	35	3	1	50520330			0	2	2	35	35	2	1	2	35	5	5	2	1	3	2	5	505201	1	35	0	3	1	2	4	1	5052	505203	50520101	13	1	1	117.604	0	70	559.906	514.471	572.942	563.814	559.761	581.182	492.368	547.594	532.007
792	35	3	1	50520331			0	1	2	35	35	1	1	2	35	1	1	2	3	1	5	3	505201	1	35	0	3	1	2	4	1	5052	505203	50520101	4	1	1	117.604	0	70	393.856	475.734	430.424	448.527	428.801	474.139	434.911	391.054	380.076
792	35	3	1	50520336			0	1	2	35	35	1	1	3	35	3	3	2	2	1	2	3	505201	1	35	0	3	1	2	4	1	5052	505203	50520101	7	1	1	117.604	0	70	517.293	523.154	553.875	489.853	500.594	520.378	502.011	509.345	535.282
792	35	3	1	50520338			0	1	2	35	35	1	1	2	35	4	4	2	1	1	1	3	505201	1	35	0	3	1	2	4	1	5052	505203	50520101	8	1	1	117.604	0	70	549.337	528.471	552.7	490.737	530.829	553.088	600.477	560.922	542.342
792	35	3	1	50520339			1	2	2	35	35	2	1	2	35	3	4	2	2	1	3	4	505201	1	35	0	3	1	2	4	1	5052	505203	50520101	17	1	1	117.604	0	70	436.709	440.889	489.763	489.86	438.752	452.772	545.653	473.445	506.89
792	35	3	1	50520702			0	2	1	35	35	2	2	3	35	3	2	2	2	1	3	2	505202	2	35	0	3	1	2	4	1	5052	505207	50520202	10	1	1	121.625	0	70	555.174	581.53	538.936	569.597	525.38	511.257	541.85	576.312	528.638
792	35	3	1	50520704			0	1	1	35	35	1	2	2	35	1	4	2	3	2	5	5	505202	2	35	0	3	1	2	4	1	5052	505207	50520202	11	1	1	121.625	0	70	528.717	463.385	452.484	435.407	468.749	508.524	485.031	485.092	495.648
792	35	3	1	50520707			0	2	1	35	35	2	2	2	35	4	3	2	2	1	4	5	505202	2	35	0	3	1	2	4	1	5052	505207	50520202	13	1	1	121.625	0	70	398.949	432.324	427.565	393.369	418.996	404.127	443.327	434.809	402.606
792	35	3	1	50520708			0	1	1	35	35	1	1	2	35	1	2	3	3	2	5	5	505202	2	35	0	3	1	2	4	1	5052	505207	50520202	2	1	1	121.625	0	70	556.767	503.133	526.514	535.267	561.989	588.821	501.081	502.609	558.88
792	35	3	1	50520709			1	1	1	35	35	1	1	2	35	1	2	2	3	1	4	7	505202	2	35	0	3	1	2	4	1	5052	505207	50520202	14	1	1	121.625	0	70	477.51	486.722	471.871	467.616	489.54	455.424	439.295	453.108	474.388
792	35	3	1	50520712			1	1	1	35	35	1	1	3	35	4	5	1	1	1	1	1	505202	2	35	0	3	1	2	4	1	5052	505207	50520202	4	1	1	121.625	0	70	618.314	583.539	587.648	614.114	560.441	532.286	581.837	552.892	559.764
792	35	3	1	50520713			0	1	1	35	35	1	2	3	35	3	3	2	2	2	3	4	505202	2	35	0	3	1	2	4	1	5052	505207	50520202	5	1	1	121.625	0	70	517.895	542.082	532.014	525.453	540.768	562.954	505.065	515.407	522.792
792	35	3	1	50520714			0	2	1	35	35	2	3	2	35	3	1	3	3	1	4	5	505202	2	35	0	3	1	2	4	1	5052	505207	50520202	16	1	1	121.625	0	70	492.252	466.611	496.245	507.519	506.19	467.579	539.161	459.407	460.874
792	35	3	1	50520715			0	1	1	35	35	1	2	2	35	4	5	2	1	1	3	2	505202	2	35	0	3	1	2	4	1	5052	505207	50520202	6	1	1	121.625	0	70	569.548	587.345	622.881	581.989	576.391	589.537	582.837	587.404	603.139
792	35	3	1	50520716			0	2	1	35	35	2	1	2	35	2	2	2	3	1	5	3	505202	2	35	0	3	1	2	4	1	5052	505207	50520202	7	1	1	121.625	0	70	441.107	348.209	387.498	444.083	424.36	431.189	384.401	473.413	408.233
792	35	3	1	50520717			0	2	1	35	35	2	1	3	35	2	2	2	3	1	5	3	505202	2	35	0	3	1	2	4	1	5052	505207	50520202	8	1	1	121.625	0	70	478.833	469.933	471.303	415.622	438.631	410.382	467.161	434.888	450.099
792	35	3	1	50520718			1	2	1	35	35	2	1	3	35	3	4	2	2	1	2	3	505202	2	35	0	3	1	2	4	1	5052	505207	50520202	9	1	1	121.625	0	70	475.628	479.777	470.89	447.601	455.25	414.653	448.947	477.212	447.09
792	35	3	1	50520720			1	1	1	35	35	1	3	2	35	3	2	2	2	2	3	5	505202	2	35	0	3	1	2	4	1	5052	505207	50520202	17	1	1	121.625	0	70	582.207	544.154	496.766	501.231	530.069	504.195	495.591	515.976	600.738
792	35	3	1	50520721			1	1	1	35	35	1	1	2	35	3	1	3	3	3	5	6	505202	2	35	0	3	1	2	4	1	5052	505207	50520202	18	1	1	121.625	0	70	548.884	445.629	442.799	461.161	464.436	536.129	476.826	486.001	443.736
792	35	3	1	50520722			0	1	1	35	35	1	2	2	35	2	2	2	2	1	3	3	505202	2	35	0	3	1	2	4	1	5052	505207	50520202	10	1	1	121.625	0	70	501.087	462.919	476.218	575.443	543.531	497.063	544.797	481.505	554.647
792	35	3	1	50520723			0	2	1	35	35	2	2	2	35	3	4	2	2	1	4	6	505202	2	35	0	3	1	2	4	1	5052	505207	50520202	11	1	1	121.625	0	70	580.966	526.565	544.41	471.097	461.315	473.149	548.673	556.753	482.647
792	35	3	1	50520724			1	2	1	35	35	2	2	2	35	1	1	3	3	2	5	5	505202	2	35	0	3	1	2	4	1	5052	505207	50520202	12	1	1	121.625	0	70	617.607	606.032	625.546	565.061	617.769	607.31	558.748	612.1	563.897
792	35	3	1	50520725			0	1	1	35	35	1	2	2	35	2	2	2	3	1	5	3	505202	2	35	0	3	1	2	4	1	5052	505207	50520202	13	1	1	121.625	0	70	592.886	529.416	555.819	578.243	626.317	616.182	570.951	527.86	646.794
792	35	3	1	50520726			1	2	1	35	35	2	1	3	35	2	2	2	2	2	1	3	505202	2	35	0	3	1	2	4	1	5052	505207	50520202	1	1	1	121.625	0	70	423.726	425.904	439.894	424.586	418.802	448.631	510.266	476.805	521.564
792	35	3	1	50520728			0	1	1	35	35	1	2	2	35	1	2	2	3	2	5	3	505202	2	35	0	3	1	2	4	1	5052	505207	50520202	3	1	1	121.625	0	70	379.736	362.936	306.922	386.835	384.956	364.679	425.861	451.904	427.744
792	35	3	1	50520729			0	2	1	35	35	2	3	2				9					505202	2	35	0	3	1	2	4	1	5052	505207	50520202	4	1	1	121.625	0	70	515.439	551.268	526.684	598.281	538.003	592.662	555.262	524.837	564.404
792	35	3	1	50520730			0	2	1	35	35	2	3	2	35	1	3	2	3	1	5	3	505202	2	35	0	3	1	2	4	1	5052	505207	50520202	14	1	1	121.625	0	70	451.507	431.075	426.744	429.491	459.003	431.056	466.68	463.54	435.579
792	35	3	1	50520731			0	2	1	35	35	2	2	3	35	2	4	2	2	1	5	3	505202	2	35	0	3	1	2	4	1	5052	505207	50520202	5	1	1	121.625	0	70	307.864	336.387	300.481	360.711	360.815	316.896	319.013	410.185	374.718
792	35	3	1	50520732			1	2	1	35	35	2	3	2	35	4	3	2	2	3	4	5	505202	2	35	0	3	1	2	4	1	5052	505207	50520202	6	1	1	121.625	0	70	571.609	581.317	580.428	587.805	567.817	568.669	556.132	600.159	574.738
792	35	3	1	50520733			1	2	1	35	35	2	3	2	35	3	3	2	3	2	5	4	505202	2	35	0	3	1	2	4	1	5052	505207	50520202	7	1	1	121.625	0	70	493.785	521.821	483.026	514.744	514.252	517.314	495.299	499.392	506.59
792	35	3	1	50520735			0	1	1	35	35	1	2	1	35	3	4	2	2	1	5	3	505202	2	35	0	3	1	2	4	1	5052	505207	50520202	16	1	1	121.625	0	70	467.608	475.345	438.069	468.753	462.623	527.994	548.167	518.878	530.481
792	35	3	1	50520736			0	2	1	35	35	2	3	2	35	3	3	2	2	1	5	3	505202	2	35	0	3	1	2	4	1	5052	505207	50520202	8	1	1	121.625	0	70	419.909	410.409	442.74	456.606	435.404	465.723	347.824	481.275	427.47
792	35	3	3	50530101			1	1	1	35	35	1	1	3	35	3	3	2	2	2	3	5	505301	1	35	0	2	1	2	4	1	5053	505301	50530101	15	1	1	263.293	0	14	597.22	603.712	658.329	697.453	652.398	604.327	636.113	632.163	579.27
792	35	3	3	50530102			1	1	1	35	35	1	2	2	35	3	2	2	3	2	4	6	505301	1	35	0	2	1	2	4	1	5053	505301	50530101	6	1	1	263.293	0	14	389.003	410.412	415.444	389.344	468.04	400.748	445.308	384.077	430.695
792	35	3	3	50530103			0	1	1	35	35	1	2	2	35	2	2	2	3	2	4	5	505301	1	35	0	2	1	2	4	1	5053	505301	50530101	7	1	1	263.293	0	14	502.18	535.487	509.136	543.709	567.51	547.365	491.896	516.769	528.727
792	35	3	3	50530104			0	1	1	35	35	1	2	1	35	1	1	3	3	1	5	4	505301	1	35	0	2	1	2	4	1	5053	505301	50530101	11	1	1	263.293	0	14	575.51	568.432	585.515	567.576	582.625	531.943	562.049	610.212	657.234
792	35	3	3	50530105			0	1	1	35	35	1	1	3	35	3	3	2	2	1	4	4	505301	1	35	0	2	1	2	4	1	5053	505301	50530101	16	1	1	263.293	0	14	614.21	542.693	592.62	607.93	550.848	593.676	605.136	586.539	574.934
792	35	3	3	50530106			0	2	1	35	35	2	1	2	35	3	3	2	2	1	3	4	505301	1	35	0	2	1	2	4	1	5053	505301	50530101	8	1	1	263.293	0	14	560.956	560.562	582.278	589.933	541.156	526.52	563.763	549.121	544.573
792	35	3	3	50530107			0	2	1	35	35	2	2	3	35	1	2	2	3	2	3	3	505301	1	35	0	2	1	2	4	1	5053	505301	50530101	17	1	1	263.293	0	14	589.039	528.064	551.689	527.514	545.314	537.264	546.827	483.298	469.138
792	35	3	3	50530108			0	1	1	35	35	1	2	3	35	4	3	2	2	1	4	4	505301	1	35	0	2	1	2	4	1	5053	505301	50530101	18	1	1	263.293	0	14	475.038	497.919	516.586	464.882	454.622	498.231	533.311	518.336	524.489
792	35	3	3	50530109			0	1	1	35	35	1	1	1	35	3	3	2	2	1	1	3	505301	1	35	0	2	1	2	4	1	5053	505301	50530101	9	1	1	263.293	0	14	485.14	513.992	509.369	467.098	497.574	514.102	495.15	496.435	519.049
792	35	3	3	50530110			0	1	1	35	35	1	2	2	35	2	2	2	2	1	2	4	505301	1	35	0	2	1	2	4	1	5053	505301	50530101	10	1	1	263.293	0	14	495.016	469.669	548.939	573.441	537.191	574.794	515.737	464.62	564.737
792	35	3	3	50530111			0	2	1	35	35	2	1	2	35	2	3	2	2	2	3	4	505301	1	35	0	2	1	2	4	1	5053	505301	50530101	11	1	1	263.293	0	14	523.598	476.2	515.468	438.623	512.233	488.619	458.902	518.65	439.369
792	35	3	3	50530112			0	1	1	35	35	1	1	3	35	4	4	2	2	1	3	4	505301	1	35	0	2	1	2	4	1	5053	505301	50530101	1	1	1	263.293	0	14	566.313	524.564	569.618	529.646	528.848	549.234	599.99	576.29	553.015
792	35	3	3	50530113			0	1	1	35	35	1	1	2	35	4	3	2	1	1	2	1	505301	1	35	0	2	1	2	4	1	5053	505301	50530101	12	1	1	263.293	0	14	552.113	487.382	508.628	498.198	546.203	458.815	556.991	494.821	547.262
792	35	3	3	50530114			0	1	1	35	35	1	1	3	35	4	4	2	2	1	3	6	505301	1	35	0	2	1	2	4	1	5053	505301	50530101	13	1	1	263.293	0	14	624.481	578.364	584.054	641.922	589.366	542.296	508.554	522.72	579.803
792	35	3	3	50530115			0	2	1	35	35	2	2	2	35	4	4	2	1	2	2	7	505301	1	35	0	2	1	2	4	1	5053	505301	50530101	12	1	1	263.293	0	14	606.542	587.824	675.943	598.29	601.865	591.928	613.539	627.552	645.266
792	35	3	3	50530116			1	2	1	35	35	2	1	3	35	3	5	1	1	2	1	1	505301	1	35	0	2	1	2	4	1	5053	505301	50530101	2	1	1	263.293	0	14	696.404	639.549	631.314	699.058	598.345	654.391	619.125	625.767	650.51
792	35	3	3	50530117			1	2	1	35	35	2	1	3	35	3	2	2	2	1	4	3	505301	1	35	0	2	1	2	4	1	5053	505301	50530101	3	1	1	263.293	0	14	441.84	451.076	422.433	459.321	469.322	427.675	457.629	413.694	480.351
792	35	3	3	50530118			0	2	1	35	35	2	1	3	35	4	3	2	2	1	1	3	505301	1	35	0	2	1	2	4	1	5053	505301	50530101	14	1	1	263.293	0	14	549.012	578.556	519.74	492.149	548.605	505.294	512.439	493.032	512.09
792	35	3	3	50530119			0	2	1	35	35	2	2	2	35	2	3	2	2	2	2	3	505301	1	35	0	2	1	2	4	1	5053	505301	50530101	4	1	1	263.293	0	14	593.495	568.274	572.048	523.963	568.545	609.342	552.707	565.794	543.575
792	35	3	3	50530120			0	1	2	35	35	1	1	2	35	5	3	2	2	3	4	4	505301	1	35	0	2	1	2	4	1	5053	505301	50530101	5	1	1	263.293	0	14	525.557	602.215	562.703	499.141	566.509	515.825	538.773	526.11	557.943
792	35	3	3	50530121			0	2	2	35	35	2	3	2	35	2	3	2	2	1	2	5	505301	1	35	0	2	1	2	4	1	5053	505301	50530101	6	1	1	263.293	0	14	587.04	674.891	608.418	632.387	621.485	600.474	569.853	575.388	571.165
792	35	3	3	50530122			0	2	2	35	35	2	1	3	35	3	3	2	2	1	3	3	505301	1	35	0	2	1	2	4	1	5053	505301	50530101	7	1	1	263.293	0	14	473.472	512.577	478.682	472.344	432.349	481.756	527.014	430.003	477.476
792	35	3	3	50530123			1	1	2	35	35	1	1	3	35	2	3	2	2	2	3	2	505301	1	35	0	2	1	2	4	1	5053	505301	50530101	8	1	1	263.293	0	14	603.71	630.69	577.662	569.378	603.531	596.675	630.552	627.713	593.008
792	35	3	3	50530124			0	2	2	35	35	2	2	3	35	3	3	2	1	2	1	1	505301	1	35	0	2	1	2	4	1	5053	505301	50530101	9	1	1	263.293	0	14	561.212	619.816	559.656	604.748	605.739	554.314	603.967	574.433	566.133
792	35	3	3	50530125			0	1	2	35	35	1	1	3	35	5	3	2	1	1	1	3	505301	1	35	0	2	1	2	4	1	5053	505301	50530101	1	1	1	263.293	0	14	458.174	490.361	469.769	462.989	508.61	491.401	503.964	451.311	470.668
792	35	3	3	50530126			0	1	2	35	35	1	1	2	35	3	3	2	1	2	1	1	505301	1	35	0	2	1	2	4	1	5053	505301	50530101	15	1	1	263.293	0	14	582.038	492.067	544.412	591.923	549.326	512.031	532.127	558.343	566.974
792	35	3	3	50530127			1	2	2	35	35	2	2	2	35	5	5	2	1	1	3	2	505301	1	35	0	2	1	2	4	1	5053	505301	50530101	16	1	1	263.293	0	14	496.938	482.337	503.563	446.371	460.716	541.378	454.804	455.345	460.516
792	35	3	3	50530128			0	2	2	35	35	2	1	2	35	2	4	2	2	2	3	1	505301	1	35	0	2	1	2	4	1	5053	505301	50530101	17	1	1	263.293	0	14	379.286	438.103	389.428	407.504	398.312	338.636	406.518	378.269	386.114
792	35	3	3	50530129			0	1	2	35	35	1	1	2	35	3	5	2	2	2	3	5	505301	1	35	0	2	1	2	4	1	5053	505301	50530101	2	1	1	263.293	0	14	494.149	548.601	466.445	517.903	550.829	526.626	536.275	554.157	507.44
792	35	3	3	50530130			1	1	2	35	35	1	3	2	35	5	5	2	1	2	1	7	505301	1	35	0	2	1	2	4	1	5053	505301	50530101	18	1	1	263.293	0	14	538.408	630.783	673.969	555.896	625.011	653.394	645.332	629.513	593.113
792	35	3	3	50530131			0	2	2	35	35	2	1	2	35	3	4	2	2	2	3	4	505301	1	35	0	2	1	2	4	1	5053	505301	50530101	3	1	1	263.293	0	14	526.247	532.363	560.916	509.769	534.567	555.95	558.823	501.1	539.384
792	35	3	3	50530132			1	2	2	35	35	2	2	2	35	3	3	2	2	1	4	4	505301	1	35	0	2	1	2	4	1	5053	505301	50530101	10	1	1	263.293	0	14	447.182	415.99	415.207	458.983	437.871	389.778	458.965	453.479	415.799
792	35	3	3	50530133			1	1	2	35	35	1	2	3	35	2	3	2	2	2	3	4	505301	1	35	0	2	1	2	4	1	5053	505301	50530101	11	1	1	263.293	0	14	526.821	499.766	472.768	499.636	511.433	510.902	491.442	584.495	489.565
792	35	3	3	50530135			0	2	2	35	35	2	1	3	35	4	4	2	2	2	3	5	505301	1	35	0	2	1	2	4	1	5053	505301	50530101	12	1	1	263.293	0	14	523.278	511.395	524.706	500.328	477.144	505.333	531.575	510.164	537.153
792	35	3	3	50530136			1	2	2	35	35	2	3	2	35	1	2	2	3	3	3	4	505301	1	35	0	2	1	2	4	1	5053	505301	50530101	5	1	1	263.293	0	14	434.89	432.42	474.681	451.428	433.276	444.42	443.956	476.312	471.89
792	35	3	3	50530137			1	2	2	35	35	2	2	3	35	3	4	2	2	1	5	4	505301	1	35	0	2	1	2	4	1	5053	505301	50530101	13	1	1	263.293	0	14	496.826	482.078	467.483	473.713	425.96	417.378	430.796	427.835	404.186
792	35	3	3	50530138			0	1	2	35	35	1	1	2	35	1	2	2	3	2	3	4	505301	1	35	0	2	1	2	4	1	5053	505301	50530101	14	1	1	263.293	0	14	438.532	459.014	398.928	443.111	453.406	427.451	420.885	465.918	490.07
792	35	4	1	50540301			1	2	1	35	35	2	1	2	35	3	2	2	2	2	4	2	505401	1	35	0	3	1	2	4	1	5054	505403	50540101	10	1	1	545.881	1	94	511.491	564.617	548.019	546.543	472.082	553.819	549.744	475.461	523.954
792	35	4	1	50540302			0	2	1	35	35	2	1	3	35	2	1	3	3	3	5	5	505401	1	35	0	3	1	2	4	1	5054	505403	50540101	1	1	1	545.881	1	94	552.917	534.114	565.668	543.319	546.426	530.006	517.59	533.979	562.253
792	35	4	1	50540303			0	1	1	35	35	1	2	2	35	1	2	2	3	3	4	5	505401	1	35	0	3	1	2	4	1	5054	505403	50540101	2	1	1	545.881	1	94	401.695	447.36	411.14	404.028	440.286	464.356	385.968	415.629	450.095
792	35	4	1	50540306			0	2	1	35	35	2	1	3	35	1	2	2	3	2	3	3	505401	1	35	0	3	1	2	4	1	5054	505403	50540101	12	1	1	545.881	1	94	430.561	436.406	425.572	423.749	446.117	446.681	353.817	397.835	418.46
792	35	4	1	50540307			1	2	1	35	35	2	3	3	35	2	1	2	3	2	4	5	505401	1	35	0	3	1	2	4	1	5054	505403	50540101	4	1	1	545.881	1	94	334.547	394.918	329.171	292.411	386.981	292.655	328.862	353.407	295.876
792	35	4	1	50540308			0	2	1	35	35	2	1	2	35	2	1	2	3	2	5	5	505401	1	35	0	3	1	2	4	1	5054	505403	50540101	13	1	1	545.881	1	94	404.205	379.957	435.464	441.706	421.255	381.944	383.292	388.735	426.343
792	35	4	1	50540310			0	2	1	35	35	2	2	2	35	3	2	2	2	1	4	3	505401	1	35	0	3	1	2	4	1	5054	505403	50540101	5	1	1	545.881	1	94	559.785	562.489	543.069	557.869	550.469	561.607	531.022	545.352	516.787
792	35	4	1	50540311			0	2	1	35	35	2	1	3	35	4	5	2	2	3	3	5	505401	1	35	0	3	1	2	4	1	5054	505403	50540101	6	1	1	545.881	1	94	566.788	551.916	567.288	570.311	548.785	534.62	538.28	505.258	531.397
792	35	4	1	50540312			1	1	1	35	35	1	1	2	35	3	3	2	3	2	5	5	505401	1	35	0	3	1	2	4	1	5054	505403	50540101	7	1	1	545.881	1	94	479.508	459.909	437.777	487.399	509.66	477.061	530.106	566.251	543.844
792	35	4	1	50540313			0	2	1	35	35	2	2	2	35	3	3	2	2	3	5	2	505401	1	35	0	3	1	2	4	1	5054	505403	50540101	14	1	1	545.881	1	94	446.018	449.178	434.935	424.685	434.739	507.035	412.169	431.489	406.244
792	35	4	1	50540314			1	1	1	35	35	1	2	2	35	3	2	2	2	2	2	5	505401	1	35	0	3	1	2	4	1	5054	505403	50540101	15	1	1	545.881	1	94	598.059	608.184	592.192	588.011	586.24	607.942	653.779	585.046	586.016
792	35	4	1	50540315			0	1	1	35	35	1	1	2	35	2	1	2	3	3	4	5	505401	1	35	0	3	1	2	4	1	5054	505403	50540101	16	1	1	545.881	1	94	468.056	465.341	485.966	437.954	482.703	424.878	515.439	492.241	456.778
792	35	4	1	50540316			0	1	1	35	35	1	2	2	35	3	3	2	3	2	5	5	505401	1	35	0	3	1	2	4	1	5054	505403	50540101	8	1	1	545.881	1	94	454.653	472.573	477.3	488.464	488.614	474.146	454.245	547.081	525.143
792	35	4	1	50540317			0	1	1	35	35	1	2	3	35	2	3	2	3	3	4	5	505401	1	35	0	3	1	2	4	1	5054	505403	50540101	9	1	1	545.881	1	94	527.085	509.252	528.069	462.413	489.25	499.4	478.5	502.386	476.453
792	35	4	1	50540318			0	1	1	35	35	1	1	2	35	3	3	2	2	3	3	5	505401	1	35	0	3	1	2	4	1	5054	505403	50540101	17	1	1	545.881	1	94	678.775	615.097	606.343	644.018	618.2	637.374	663.565	579.436	554.985
792	35	4	1	50540319			0	1	1	35	35	1	1	3	35	3	2	2	2	2	2	5	505401	1	35	0	3	1	2	4	1	5054	505403	50540101	1	1	1	545.881	1	94	619.432	666.549	625.399	680.094	661.25	610.163	666.531	660.187	645.593
792	35	4	1	50540323			0	1	1	35	35	1	2	2	35	2	1	2	3	3	4	5	505401	1	35	0	3	1	2	4	1	5054	505403	50540101	10	1	1	545.881	1	94	498.485	470.14	496.551	500.178	516.928	488.067	526.657	452.611	533.633
792	35	4	1	50540324			1	1	1	35	35	1	1	3	35	5	4	1	1	1	1	1	505401	1	35	0	3	1	2	4	1	5054	505403	50540101	11	1	1	545.881	1	94	628.053	559.405	531.631	511.501	619.102	578.835	625.552	633.129	556.952
792	35	4	1	50540326			0	1	1	35	35	1	1	3	35	4	4	1	1	3	1	1	505401	1	35	0	3	1	2	4	1	5054	505403	50540101	12	1	1	545.881	1	94	540.711	568.474	546.613	519.63	550.687	531.963	518.575	544.887	482.142
792	35	4	2	50550201			1	2	1	35	35	2	2	2	35	5	3	2	2	1	5	5	505501	1	35	0	2	1	2	4	1	5055	505502	50550101	2	1	1	126.522	0	27	335.577	316.101	338.358	358.845	385.151	250.073	390.012	400.734	376.809
792	35	4	2	50550202			0	1	1	35	35	1	2	3	35	5	3	2	2	1	5	3	505501	1	35	0	2	1	2	4	1	5055	505502	50550101	10	1	1	126.522	0	27	609.71	607.404	551.297	569.729	514.733	521.479	547.583	540.46	598.326
792	35	4	2	50550203			0	1	1	35	35	1	1	2	35	3	3	2	3	2	5	5	505501	1	35	0	2	1	2	4	1	5055	505502	50550101	11	1	1	126.522	0	27	424.024	430.882	461.889	388.285	396.611	436.423	451.47	462.203	412.044
792	35	4	2	50550205			0	2	1	35	35	2	1	1	35	4	4	2	2	1	3	5	505501	1	35	0	2	1	2	4	1	5055	505502	50550101	3	1	1	126.522	0	27	410.243	414.281	486.363	448.515	388.142	426.856	431.942	412.401	398.728
792	35	4	2	50550206			1	1	1	35	35	1	1	2	35	5	4	2	2	1	5	2	505501	1	35	0	2	1	2	4	1	5055	505502	50550101	4	1	1	126.522	0	27	460.191	471.256	454.504	410.935	441.439	426.09	437.316	464.966	413.844
792	35	4	2	50550207			0	1	1	35	35	1	1	3	35	5	4	2	2	1	5	5	505501	1	35	0	2	1	2	4	1	5055	505502	50550101	5	1	1	126.522	0	27	500.509	447.353	470.477	465.64	482.242	519.104	445.171	478.193	451.017
792	35	4	2	50550208			0	1	1	35	35	1	1	2	35	4	4	2	2	1	4	5	505501	1	35	0	2	1	2	4	1	5055	505502	50550101	6	1	1	126.522	0	27	433.513	408.615	416.749	441.357	432.363	417.769	453.816	452.352	401.318
792	35	4	2	50550209			0	1	1	35	35	1	1	1	35	4	3	2	2	1	4	2	505501	1	35	0	2	1	2	4	1	5055	505502	50550101	7	1	1	126.522	0	27	510.995	481.993	490.732	499.922	527.808	505.317	493.12	452.616	480.341
792	35	4	2	50550210			0	1	1	35	35	1	1	3	35	5	4	2	2	1	4	2	505501	1	35	0	2	1	2	4	1	5055	505502	50550101	8	1	1	126.522	0	27	590.008	580.762	550.602	614.362	550.968	609.853	582.41	565.288	578.351
792	35	4	2	50550212			1	1	1	35	35	1	1	2	35	5	4	2	1	1	1	1	505501	1	35	0	2	1	2	4	1	5055	505502	50550101	13	1	1	126.522	0	27	615.504	572.082	616.482	608.614	592.708	519.944	596.301	536.268	640.512
792	35	4	2	50550213			0	2	1	35	35	2	1	2	35	4	3	2	2	2	4	5	505501	1	35	0	2	1	2	4	1	5055	505502	50550101	9	1	1	126.522	0	27	550.886	563.302	547.535	551.58	536.636	539.646	515.375	551.11	540.695
792	35	4	2	50550214			0	2	1	35	35	2	1	2	35	3	3	2	2	1	4	5	505501	1	35	0	2	1	2	4	1	5055	505502	50550101	14	1	1	126.522	0	27	319.659	327.471	288.147	318.433	309.883	304.062	420.308	324.613	359.152
792	35	4	2	50550215			1	1	1	35	35	1	1	2	35	4	4	2	2	1	3	3	505501	1	35	0	2	1	2	4	1	5055	505502	50550101	1	1	1	126.522	0	27	540.998	524.775	497.957	517.978	527.906	525.791	503.809	508.535	503.954
792	35	4	2	50550216			0	1	1	35	35	1	1	2	35	4	4	2	2	1	5	5	505501	1	35	0	2	1	2	4	1	5055	505502	50550101	2	1	1	126.522	0	27	466.13	465.376	483.948	469.56	531.578	493.409	481.884	463.149	483.005
792	35	4	2	50550217			0	2	1	35	35	2	1	3	35	4	4	2	2	2	3	5	505501	1	35	0	2	1	2	4	1	5055	505502	50550101	15	1	1	126.522	0	27	471.935	447.86	451.829	496.416	469.027	493.58	465.938	450.144	418.723
792	35	4	2	50550218			0	1	1	35	35	1	1	3	35	4	3	2	2	1	2	2	505501	1	35	0	2	1	2	4	1	5055	505502	50550101	3	1	1	126.522	0	27	517.37	567.462	554.413	478.791	524.172	519.211	515.684	577.492	576.501
792	35	4	2	50550219			0	2	1	35	35	2	1	2	35	5	5	2	1	2	2	2	505501	1	35	0	2	1	2	4	1	5055	505502	50550101	4	1	1	126.522	0	27	416.581	406.919	408.942	467.444	441.492	408.487	431.323	460.877	405.077
792	35	4	2	50550220			0	2	1	35	35	2	1	3	35	4	4	2	2	1	4	5	505501	1	35	0	2	1	2	4	1	5055	505502	50550101	16	1	1	126.522	0	27	439.679	399.935	433.388	372.608	439.912	444.847	456.738	465.332	362.911
792	35	4	2	50550221			0	2	1	35	35	2	1	2	35	4	4	2	2	1	2	5	505501	1	35	0	2	1	2	4	1	5055	505502	50550101	17	1	1	126.522	0	27	568.652	623.579	513.418	599.904	532.835	552.012	611.114	570.628	570.488
792	35	4	2	50550222			1	2	1	35	35	2	1	3	35	5	5	2	1	1	1	5	505501	1	35	0	2	1	2	4	1	5055	505502	50550101	5	1	1	126.522	0	27	377.782	442.312	387.89	443.341	408.678	459.986	437.31	431.233	397.407
792	35	4	2	50550223			1	1	1	35	35	1	1	2	35	4	4	2	2	1	3	5	505501	1	35	0	2	1	2	4	1	5055	505502	50550101	18	1	1	126.522	0	27	371.176	421.936	381.948	465.953	404.114	434.958	423.219	422.764	454.676
792	35	4	2	50550224			0	2	1	35	35	2	1	2	35	5	5	2	1	1	1	3	505501	1	35	0	2	1	2	4	1	5055	505502	50550101	6	1	1	126.522	0	27	537.999	563.183	523.916	527.195	562.127	572.033	555.667	569.057	558.486
792	35	4	2	50550225			0	2	1	35	35	2	2	2	35	4	3	2	2	1	5	5	505501	1	35	0	2	1	2	4	1	5055	505502	50550101	10	1	1	126.522	0	27	162.901	175.216	188.599	164.626	221.567	137.377	191.531	195.416	183.836
792	35	4	2	50550226			1	2	1	35	35	2	3	2	35	3	2	3	3	2	5	5	505501	1	35	0	2	1	2	4	1	5055	505502	50550101	11	1	1	126.522	0	27	429.741	428.098	414.664	403.636	396.664	415.434	386.901	395.424	440.007
792	35	4	2	50550227			0	2	1	35	35	2	1	2	35	3	3	2	2	2	3	3	505501	1	35	0	2	1	2	4	1	5055	505502	50550101	12	1	1	126.522	0	27	362.211	353.162	315.496	364.605	323.934	367.027	324.56	296.919	292.96
792	35	4	2	50550230			1	1	1	35	35	1	2	2	35	3	2	3	3	2	5	5	505501	1	35	0	2	1	2	4	1	5055	505502	50550101	9	1	1	126.522	0	27	454.476	493.417	452.31	490.21	472.233	527.222	527.536	456.861	472.789
792	35	4	2	50550235			0	1	1	35	35	1	1	1	35	3	4	2	2	1	4	5	505501	1	35	0	2	1	2	4	1	5055	505502	50550101	2	1	1	126.522	0	27	476.137	444.898	494.71	432.184	481.983	532.888	533.971	508.706	438.222
792	35	4	2	50550236			1	2	1	35	35	2	1	3	35	4	4	2	2	1	4	5	505501	1	35	0	2	1	2	4	1	5055	505502	50550101	15	1	1	126.522	0	27	354.909	289.076	381.741	394.611	344.67	396.97	365.232	380.49	382.59
792	35	4	2	50550237			0	2	1	35	35	2	2	2	35	5	4	2	2	1	5	5	505501	1	35	0	2	1	2	4	1	5055	505502	50550101	16	1	1	126.522	0	27	458.032	450.377	468.084	504.275	449.047	509.142	495.061	455.7	532.348
792	35	4	2	50550238			1	1	1	35	35	1	1	2	35	4	4	2	2	1	3	5	505501	1	35	0	2	1	2	4	1	5055	505502	50550101	17	1	1	126.522	0	27	486.825	606.675	500.92	558.491	518.972	546.413	559.331	573.426	594.765
792	35	4	2	50551101			1	1	1	35	35	1	2	1	35	1	9	3	3	2	5	5	505502	2	35	0	4	1	2	4	1	5055	505511	50550202	3	1	1	118.614	0	27	362.907	391.759	424.215	453.461	457.11	442.357	392.383	428.684	403.784
792	35	4	2	50551104			0	2	1	35	35	2	1	3	35	4	4	2	2	1	4	5	505502	2	35	0	4	1	2	4	1	5055	505511	50550202	4	1	1	118.614	0	27	548.479	567.618	558.029	509.639	482.202	518.199	549.303	541.93	541.798
792	35	4	2	50551105			0	1	1	35	35	1	2	1	35	2	4	3	3	2	5	5	505502	2	35	0	4	1	2	4	1	5055	505511	50550202	13	1	1	118.614	0	27	445.096	477.875	461.179	474.384	499.69	436.554	426.445	437.943	467.228
792	35	4	2	50551106			0	1	1	35	35	1	1	2	35	4	3	2	2	1	5	5	505502	2	35	0	4	1	2	4	1	5055	505511	50550202	14	1	1	118.614	0	27	430.904	428.578	435.766	457.448	442.046	445.744	397.278	430.793	429.59
792	35	4	2	50551107			0	2	1	35	35	2	2	3	35	4	9	2	2	1	1	5	505502	2	35	0	4	1	2	4	1	5055	505511	50550202	15	1	1	118.614	0	27	541.631	513.919	519.604	537.034	593.671	532.897	547.334	506.771	517.461
792	35	4	2	50551110			0	2	1	35	35	2	2	2	35	3	3	2	2	2	4	5	505502	2	35	0	4	1	2	4	1	5055	505511	50550202	7	1	1	118.614	0	27	517.536	523.111	498.014	493.732	480.437	558.503	503.334	503.075	482.804
792	35	4	2	50551111			1	2	1	35	35	2	1	2	35	3	2	3	3	2	5	5	505502	2	35	0	4	1	2	4	1	5055	505511	50550202	16	1	1	118.614	0	27	522.97	484.601	456.966	468	474.367	452.702	459.268	391.966	465.691
792	35	4	2	50551112			0	1	1	35	35	1	1	3	35	4	4	2	2	2	5	5	505502	2	35	0	4	1	2	4	1	5055	505511	50550202	17	1	1	118.614	0	27	498.405	509	546.569	524.438	523.419	556.424	625.965	546.793	561.487
792	35	4	2	50551115			0	2	1	35	35	2	2	1	35	4	3	3	2	2	5	6	505502	2	35	0	4	1	2	4	1	5055	505511	50550202	9	1	1	118.614	0	27	532.275	530.775	525.251	508.711	531.724	516.226	521.149	510.102	551.577
792	35	4	2	50551116			0	2	1	35	35	2	2	2	35	2	9	2	3	2	3	4	505502	2	35	0	4	1	2	4	1	5055	505511	50550202	10	1	1	118.614	0	27	341.935	364.371	327.541	277.887	380.086	327.432	318.017	323.621	345.62
792	35	4	2	50551117			0	2	1	35	35	2	2	1	35	4	3	2	2	1	4	5	505502	2	35	0	4	1	2	4	1	5055	505511	50550202	11	1	1	118.614	0	27	674.38	568.863	614.172	603.659	622.794	664.724	663.998	540.07	595.098
792	35	4	2	50551118			0	1	1	35	35	1	2	2	35	1	4	2	3	2	5	4	505502	2	35	0	4	1	2	4	1	5055	505511	50550202	12	1	1	118.614	0	27	429.239	409.891	416.257	452.096	428.223	402.273	413.653	424.983	468.38
792	35	4	2	50551119			0	1	1	35	35	1	1	3	35	3	4	2	2	1	4	5	505502	2	35	0	4	1	2	4	1	5055	505511	50550202	1	1	1	118.614	0	27	444.619	469.614	432.705	470.533	420.332	421.309	415.769	502.339	461.959
792	35	4	2	50551120			0	1	1	35	35	1	1	3	35	3	3	2	3	2	5	5	505502	2	35	0	4	1	2	4	1	5055	505511	50550202	2	1	1	118.614	0	27	484.663	504.478	461.735	518.956	477.841	441.194	430.38	476.673	473.462
792	35	4	2	50551123			1	2	1	35	35	2	1	2	35	4	3	2	2	2	5	5	505502	2	35	0	4	1	2	4	1	5055	505511	50550202	14	1	1	118.614	0	27	505.192	431.956	450.101	407.296	466.011	406.338	400.217	388.816	353.213
792	35	4	2	50551124			0	2	1	35	35	2	2	2	35	1	1	3	3	1	5	5	505502	2	35	0	4	1	2	4	1	5055	505511	50550202	4	1	1	118.614	0	27	446.032	477.503	417.487	374.984	428.555	379.454	420.792	447.028	432.108
792	35	4	2	50551126			0	2	1	35	35	2	1	1	35	3	3	2	2	1	3	2	505502	2	35	0	4	1	2	4	1	5055	505511	50550202	6	1	1	118.614	0	27	576.01	550.419	472.13	523.275	516.165	479.989	585.508	531.026	506.517
792	35	4	2	50551127			1	1	1	35	35	1	1	3	35	2	3	2	3	1	5	5	505502	2	35	0	4	1	2	4	1	5055	505511	50550202	7	1	1	118.614	0	27	364.557	353.857	390.297	355.417	371.686	391.412	367.912	375.749	360.113
792	35	4	2	50551128			0	2	1	35	35	2	1	3	35	5	4	2	2	1	5	5	505502	2	35	0	4	1	2	4	1	5055	505511	50550202	8	1	1	118.614	0	27	501.917	510.752	467.526	502.206	476.873	442.19	513.876	466.05	446.208
792	35	4	2	50551129			0	2	1	35	35	2	2	1	35	2	9	3	3	2	5	5	505502	2	35	0	4	1	2	4	1	5055	505511	50550202	15	1	1	118.614	0	27	360.52	399.908	328.725	416.081	389.288	400.784	376.076	398.239	337.348
792	35	4	2	50551131			1	1	1	35	35	1	1	2	35	2	3	2	3	2	5	5	505502	2	35	0	4	1	2	4	1	5055	505511	50550202	1	1	1	118.614	0	27	465.799	481.876	501.184	448.691	509.354	488.804	463.98	440.626	481.78
792	35	4	2	50551132			0	1	1	35	35	1	2	1	35	5	4	2	2	1	3	3	505502	2	35	0	4	1	2	4	1	5055	505511	50550202	16	1	1	118.614	0	27	445.204	447.215	407.889	426.209	416.815	397.436	433.029	404.452	478.372
792	35	4	2	50551133			0	1	1	35	35	1	3	3	35	3	3	2	2	3	4	5	505502	2	35	0	4	1	2	4	1	5055	505511	50550202	17	1	1	118.614	0	27	496.117	487.457	467.024	470.563	415.98	458.079	493.491	509.687	486.358
792	35	4	2	50551134			1	1	1	35	35	1	2	3	35	3	3	2	3	3	5	5	505502	2	35	0	4	1	2	4	1	5055	505511	50550202	18	1	1	118.614	0	27	489.472	509.363	488.106	492.922	432.322	446.637	449.802	426.016	479.453
792	35	4	1	50560101			0	1	1	35	35	1	1	2	35	1	1	3	3	3	5	4	505601	1	35	0	3	1	2	4	1	5056	505601	50560101	14	1	1	695.112	0	57	586.584	578.255	514.639	559.197	530.882	588.055	578.624	536.663	584.957
792	35	4	1	50560102			0	1	1	35	35	1	1	2	35	1	1	3	3	3	5	4	505601	1	35	0	3	1	2	4	1	5056	505601	50560101	15	1	1	695.112	0	57	486.165	500.464	570.097	503.789	524.268	474.427	562.644	449.368	537.904
792	35	4	1	50560103			0	1	1	35	35	1	1	1	35	1	1	3	3	3	5	6	505601	1	35	0	3	1	2	4	1	5056	505601	50560101	16	1	1	695.112	0	57	327.234	328.255	340.14	349.912	342.226	349.74	352.49	365.01	264.129
792	35	4	1	50560104			0	1	1	35	35	1	1	1	35	1	1	3	3	3	5	4	505601	1	35	0	3	1	2	4	1	5056	505601	50560101	4	1	1	695.112	0	57	472.08	500.89	535.805	531.319	537.192	540.455	539.962	498.959	557.701
792	35	4	1	50560105			1	2	1	35	35	2	3	1	35	1	1	3	3	3	5	4	505601	1	35	0	3	1	2	4	1	5056	505601	50560101	5	1	1	695.112	0	57	424.943	353.193	394.727	445.766	493.418	445.45	429.978	477.791	449.447
792	35	4	1	50560106			0	2	1	35	35	2	2	1	35	1	1	3	3	3	4	4	505601	1	35	0	3	1	2	4	1	5056	505601	50560101	6	1	1	695.112	0	57	482.207	449.319	461.951	456.787	436.457	507.186	492.516	474.195	512.887
792	35	4	1	50560107			1	1	1	35	35	1	1	1	35	2	1	3	3	3	5	4	505601	1	35	0	3	1	2	4	1	5056	505601	50560101	17	1	1	695.112	0	57	465.376	429.386	422.9	425.261	482.745	441.432	387.012	412.139	451.639
792	35	4	1	50560108			0	1	1	35	35	1	1	1	35	1	1	3	3	3	5	6	505601	1	35	0	3	1	2	4	1	5056	505601	50560101	7	1	1	695.112	0	57	446.957	413.698	452.935	438.677	411.117	425.614	443.726	422.28	392.562
792	35	4	1	50560109			1	1	1	35	35	1	1	1	35	1	1	3	3	3	4	6	505601	1	35	0	3	1	2	4	1	5056	505601	50560101	8	1	1	695.112	0	57	322.026	330.413	294.686	223.885	323.427	288.744	284.375	421.35	341.436
792	35	4	1	50560110			0	2	1	35	35	2	9	1	35	1	1	3	3	3	5	4	505601	1	35	0	3	1	2	4	1	5056	505601	50560101	9	1	1	695.112	0	57	426.499	410.507	428.415	433.627	413.213	373.223	413.277	449.028	365.193
792	35	4	1	50560111			0	1	1	35	35	1	1	1	35	1	1	3	3	3	5	4	505601	1	35	0	3	1	2	4	1	5056	505601	50560101	18	1	1	695.112	0	57	376.922	379.907	358.34	352.947	363.017	344.863	382.595	358.618	351.864
792	35	4	1	50560113			0	1	1	35	35	1	2	2	35	1	1	2	3	3	4	6	505601	1	35	0	3	1	2	4	1	5056	505601	50560101	2	1	1	695.112	0	57	404.91	437.284	352.534	444.293	399.21	407.047	376.75	320.982	359.477
792	35	4	1	50560115			0	1	1	35	35	1	2	3	35	1	1	3	3	3	5	4	505601	1	35	0	3	1	2	4	1	5056	505601	50560101	11	1	1	695.112	0	57	548.997	494.441	502.959	449.306	494.503	508.7	514.95	510.948	496.233
792	35	4	1	50560116			0	2	1	35	35	2	2	2	35	1	1	3	3	3	5	6	505601	1	35	0	3	1	2	4	1	5056	505601	50560101	3	1	1	695.112	0	57	360.349	339.617	377.801	316.699	365.48	404.17	322.698	302.283	315.316
792	35	4	1	50560117			1	2	1	35	35	2	1	2	35	1	2	3	3	3	5	4	505601	1	35	0	3	1	2	4	1	5056	505601	50560101	12	1	1	695.112	0	57	584.429	521.837	553.459	608.353	542.827	529.03	567.49	559.618	497.539
792	35	3	4	50570502			0	2	1	35	35	2	2	3	35	1	2	2	2	2	2	1	505701	1	35	0	2	1	2	4	1	5057	505705	50570101	3	1	1	299.301	1	87	524.441	493.377	540.614	555.813	523.406	491.298	502.373	527.386	540.171
792	35	3	4	50570503			0	1	1	35	35	1	1	3	35	3	3	2	3	1	5	5	505701	1	35	0	2	1	2	4	1	5057	505705	50570101	17	1	1	299.301	1	87	664.11	607.921	590.123	605.791	621.746	637.565	626.455	574.2	657.851
792	35	3	4	50570505			1	2	1	35	35	2	2	2	35	1	2	3	3	2	5	5	505701	1	35	0	2	1	2	4	1	5057	505705	50570101	18	1	1	299.301	1	87	389.668	513.688	457.118	407.695	449.758	509.934	456.413	488.674	465.818
792	35	3	4	50570506			0	1	1	35	35	1	1	2	35	3	5	2	2	1	4	3	505701	1	35	0	2	1	2	4	1	5057	505705	50570101	10	1	1	299.301	1	87	577.962	557.488	543.028	576.416	567.912	567.397	512.326	531.897	588.472
792	35	3	4	50570507			1	2	1	35	35	2	2	3	35	3	3	2	2	1	1	3	505701	1	35	0	2	1	2	4	1	5057	505705	50570101	11	1	1	299.301	1	87	439.186	451.184	493.117	523.651	476.376	459.191	426.904	428.919	459.228
792	35	3	4	50570508			0	1	1	35	35	1	2	3	35	2	3	2	3	2	5	4	505701	1	35	0	2	1	2	4	1	5057	505705	50570101	12	1	1	299.301	1	87	500.924	483.324	457.126	495.648	472.033	466.77	501.983	481.136	474.164
792	35	3	4	50570509			1	1	1	35	35	1	1	3	35	3	3	2	2	1	2	1	505701	1	35	0	2	1	2	4	1	5057	505705	50570101	13	1	1	299.301	1	87	543.756	482.599	462.733	447.085	544.992	561.92	478.449	532.877	531.993
792	35	3	4	50570510			0	1	1	35	35	1	1	2	35	2	3	2	2	1	3	4	505701	1	35	0	2	1	2	4	1	5057	505705	50570101	5	1	1	299.301	1	87	540.094	490.021	502.696	557.78	579.558	548.576	571.862	531.203	565.444
792	35	3	4	50570511			0	1	1	35	35	1	2	3	35	3	3	2	2	1	3	3	505701	1	35	0	2	1	2	4	1	5057	505705	50570101	14	1	1	299.301	1	87	509.742	565.02	545.133	534.45	522.022	571.588	578.918	559.229	567.814
792	35	3	4	50570512			0	2	1	35	35	2	1	3	35	5	3	2	1	2	2	1	505701	1	35	0	2	1	2	4	1	5057	505705	50570101	15	1	1	299.301	1	87	503.366	469.541	450.556	430.16	437.509	503.711	461.95	458.927	461.988
792	35	3	4	50570513			0	1	1	35	35	1	2	3	35	3	3	2	2	1	1	3	505701	1	35	0	2	1	2	4	1	5057	505705	50570101	6	1	1	299.301	1	87	671.349	703.629	679.934	634.302	690.938	645.844	690.613	635.843	704.571
792	35	3	4	50570514			1	2	1	35	35	2	3	3	35	1	2	2	3	1	5	3	505701	1	35	0	2	1	2	4	1	5057	505705	50570101	16	1	1	299.301	1	87	591.33	518.81	583.225	560.784	582.395	591.914	517.4	641.435	536.826
792	35	3	4	50570515			1	2	1	35	35	2	1	3	35	3	3	2	2	1	1	2	505701	1	35	0	2	1	2	4	1	5057	505705	50570101	7	1	1	299.301	1	87	600.521	624.518	639.735	566.184	572.485	634.994	676.844	619.712	624.156
792	35	3	4	50570516			0	1	1	35	35	1	1	3	35	2	4	2	2	1	1	6	505701	1	35	0	2	1	2	4	1	5057	505705	50570101	17	1	1	299.301	1	87	597.823	611.754	633.648	586.329	551.363	584.777	577.275	551.89	610.604
792	35	3	4	50570517			0	1	1	35	35	1	3	3	35	3	3	2	2	2	2	1	505701	1	35	0	2	1	2	4	1	5057	505705	50570101	8	1	1	299.301	1	87	524.016	532.334	524.037	549.025	511.294	534.171	477.806	513.673	505.063
792	35	3	4	50570518			0	2	1	35	35	2	1	3	35	5	2	2	2	1	1	3	505701	1	35	0	2	1	2	4	1	5057	505705	50570101	18	1	1	299.301	1	87	440.53	423.255	449.109	427.69	454.333	456.91	439.646	421.32	447.916
792	35	3	4	50570519			0	2	1	35	35	2	3	3	35	3	5	1	1	1	2	2	505701	1	35	0	2	1	2	4	1	5057	505705	50570101	9	1	1	299.301	1	87	541.211	561.55	638.579	567.743	580.893	652.76	597.062	586.985	603.061
792	35	3	4	50570520			1	1	1	35	35	1	2	3	35	4	5	2	2	1	3	6	505701	1	35	0	2	1	2	4	1	5057	505705	50570101	1	1	1	299.301	1	87	562.087	523.792	578.312	545.272	548.739	567.407	566.307	595.572	548.993
792	35	3	4	50570524			1	2	1	35	35	2	2	3	35	2	3	2	3	3	5	3	505701	1	35	0	2	1	2	4	1	5057	505705	50570101	4	1	1	299.301	1	87	509.484	501.738	496.485	515.193	513.351	447.222	516.292	547.665	428.913
792	35	3	4	50570525			1	2	1	35	35	2	1	3	35	2	3	2	2	2	3	3	505701	1	35	0	2	1	2	4	1	5057	505705	50570101	5	1	1	299.301	1	87	641.976	645.462	645.385	594.316	622.584	647.375	634.398	681.472	694.531
792	35	3	4	50580101			0	1	1	35	35	1	1	2	35	2	1	2	3	2	3	4	505801	1	35	0	3	1	2	4	1	5058	505801	50580101	12	1	1	388.102	1	76	427.619	444.372	412.663	448.929	474.331	443.798	452.373	457.314	423.894
792	35	3	4	50580103			0	2	1	35	35	2	1	2	35	2	2	2	2	9	3	7	505801	1	35	0	3	1	2	4	1	5058	505801	50580101	14	1	1	388.102	1	76	552.754	506.969	566.066	512.155	582.826	487.22	511.289	474.06	509.523
792	35	3	4	50580106			0	2	1	35	35	2	2	2	35	1	2	2	2	2	2	3	505801	1	35	0	3	1	2	4	1	5058	505801	50580101	16	1	1	388.102	1	76	588.768	613.136	645.814	652.393	635.83	571.134	638.426	605.539	580.1
792	35	3	4	50580107			0	2	1	35	35	2	1	2	35	5	4	2	1	2	1	1	505801	1	35	0	3	1	2	4	1	5058	505801	50580101	17	1	1	388.102	1	76	507.894	453.488	498.16	472.265	537.751	444.54	449.074	469.797	436.525
792	35	3	4	50580108			0	1	1	35	35	1	1	3	35	3	4	1	1	2	1	1	505801	1	35	0	3	1	2	4	1	5058	505801	50580101	2	1	1	388.102	1	76	618.028	563.014	583.264	635.211	578.548	631.308	629.593	669.61	592.768
792	35	3	4	50580109			1	1	1	35	35	1	1	3	35	3	3	2	3	2	5	5	505801	1	35	0	3	1	2	4	1	5058	505801	50580101	3	1	1	388.102	1	76	515.314	437.709	482.604	461.375	492.966	495.327	497.807	469.811	457.323
792	35	3	4	50580112			1	1	1	35	35	1	1	2	35	1	2	2	2	2	2	3	505801	1	35	0	3	1	2	4	1	5058	505801	50580101	5	1	1	388.102	1	76	489.661	488.07	479.767	441.337	481.112	457.666	452.414	393.619	472.508
792	35	3	4	50580113			0	1	1	35	35	1	1	3	35	9	9	9	9	9	9	9	505801	1	35	0	3	1	2	4	1	5058	505801	50580101	10	1	1	388.102	1	76	541.542	605.737	570.187	553.411	588.083	577.26	566.282	480.127	557.043
792	35	3	4	50580115			0	2	1	35	35	2	1	3	35	4	5	2	1	2	1	6	505801	1	35	0	3	1	2	4	1	5058	505801	50580101	6	1	1	388.102	1	76	533.101	549.184	523.713	528.272	530.577	574.455	550.712	602.152	570.858
792	35	3	4	50580117			1	2	1	35	35	2	1	3	35	4	4	1	1	1	1	1	505801	1	35	0	3	1	2	4	1	5058	505801	50580101	12	1	1	388.102	1	76	661.39	642.035	663.134	656.172	657.369	674.723	704.621	624.453	627.945
792	35	3	4	50580118			0	2	1	35	35	2	1	3	35	4	4	2	2	1	2	3	505801	1	35	0	3	1	2	4	1	5058	505801	50580101	13	1	1	388.102	1	76	501.39	501.289	477.239	441.428	503.729	513.431	476.686	464.743	495.666
792	35	3	4	50580119			1	1	1	35	35	1	1	2	35	3	3	2	2	2	2	3	505801	1	35	0	3	1	2	4	1	5058	505801	50580101	7	1	1	388.102	1	76	534.05	627.404	599.052	577.836	601.326	559.492	533.689	575.575	529.192
792	35	3	4	50580120			0	1	1	35	35	1	1	2	35	9	9	9	9	9	9	9	505801	1	35	0	3	1	2	4	1	5058	505801	50580101	8	1	1	388.102	1	76	487.852	504.071	492.472	503.892	492.091	523.278	456.856	516.943	487.66
792	35	3	4	50580121			0	2	1	35	35	2	1	2	35	3	3	2	2	2	3	3	505801	1	35	0	3	1	2	4	1	5058	505801	50580101	14	1	1	388.102	1	76	669.278	732.956	734.276	629.417	712.881	655.928	565.375	676.578	581.961
792	35	3	4	50580123			1	2	1	35	35	2	1	3	35	4	5	1	1	1	1	1	505801	1	35	0	3	1	2	4	1	5058	505801	50580101	15	1	1	388.102	1	76	578.735	592.857	580.731	629.069	601.176	575.214	614.776	526.481	542.909
792	35	3	4	50580124			0	1	1	35	35	1	1	2	35	3	3	2	2	2	1	3	505801	1	35	0	3	1	2	4	1	5058	505801	50580101	1	1	1	388.102	1	76	577.127	616.629	555.113	570.713	576.411	538.078	504.549	526.496	562.266
792	35	3	4	50580125			0	2	1	35	35	2	1	3	35	3	5	1	1	1	1	3	505801	1	35	0	3	1	2	4	1	5058	505801	50580101	2	1	1	388.102	1	76	481.944	434.503	470.899	467.557	460.971	490.534	493.22	478.449	492.235
792	35	3	4	50580126			0	1	1	35	35	1	1	2	35	2	5	2	2	1	2	4	505801	1	35	0	3	1	2	4	1	5058	505801	50580101	3	1	1	388.102	1	76	483.026	469.646	513.841	506.271	524.566	503.083	522.81	591.038	504.877
792	35	3	4	50580127			0	2	1	35	35	2	1	2	35	2	2	2	3	2	5	4	505801	1	35	0	3	1	2	4	1	5058	505801	50580101	4	1	1	388.102	1	76	478.578	479.143	478.968	518.616	475.367	420.901	452.763	411.545	422.514
792	35	1	4	50590102			0	2	1	35	35	2	2	3				9					505901	1	35	0	2	1	2	4	1	5059	505901	50590101	11	1	1	517.51	1	56	490.389	494.134	554.292	481.487	538.349	542.638	575.781	498.001	527.52
792	35	1	4	50590103			1	2	1	35	35	2	2	3				9					505901	1	35	0	2	1	2	4	1	5059	505901	50590101	12	1	1	517.51	1	56	550.201	530.016	596.396	545.515	564.304	523.275	562.2	548.05	503.882
792	35	1	4	50590106			0	1	1	35	35	1	1	3				9					505901	1	35	0	2	1	2	4	1	5059	505901	50590101	6	1	1	517.51	1	56	579.916	589.729	593.609	533.686	575.41	512.947	582.263	553.921	607.905
792	35	1	4	50590107			0	2	1	35	35	2	1	3	35	5	5	1	1	2	1	1	505901	1	35	0	2	1	2	4	1	5059	505901	50590101	14	1	1	517.51	1	56	576.345	579.923	558.763	553.973	632.902	513.447	584.969	551.718	597.408
792	35	1	4	50590109			1	1	1	35	35	1	1	3	35	5	4	1	1	1	1	1	505901	1	35	0	2	1	2	4	1	5059	505901	50590101	7	1	1	517.51	1	56	546.42	565.42	543.393	550.376	549.911	553.111	558.701	499.684	482.196
792	35	1	4	50590110			0	2	1	35	35	2	2	2	35	3	4	2	1	3	1	1	505901	1	35	0	2	1	2	4	1	5059	505901	50590101	8	1	1	517.51	1	56	480.887	521.841	524.786	489.694	498.423	478.118	510.398	473.697	476.725
792	35	1	4	50590113			0	2	1	35	35	2	3	2	35	3	3	2	1	1	1	1	505901	1	35	0	2	1	2	4	1	5059	505901	50590101	16	1	1	517.51	1	56	524.296	516.356	509.563	543.756	519.268	527.596	530.481	507.709	531.508
792	35	1	4	50590116			1	2	1	35	35	2	1	3				9					505901	1	35	0	2	1	2	4	1	5059	505901	50590101	3	1	1	517.51	1	56	483.813	475.661	476.385	487.214	484.289	554.369	467.068	443.423	508.81
792	35	1	4	50590117			0	1	1	35	35	1	1	3	35	4	3	1	1	1	1	1	505901	1	35	0	2	1	2	4	1	5059	505901	50590101	18	1	1	517.51	1	56	602.46	580.504	608.765	607.458	648.331	545.664	635.005	651.13	618.165
792	35	4	1	50600602			0	1	1	35	35	1	1	1	35	1	2	2	3	2	4	2	506001	1	35	0	2	1	2	4	1	5060	506006	50600101	15	1	1	156.237	0	73	567.73	575.008	555.099	568.361	573.508	491.797	517.981	548.076	478.764
792	35	4	1	50600603			0	2	1	35	35	2	1	3	35	3	4	2	2	3	3	4	506001	1	35	0	2	1	2	4	1	5060	506006	50600101	3	1	1	156.237	0	73	628.088	662.649	621.78	665.613	693.708	663.087	620.49	689.153	652.264
792	35	4	1	50600604			0	2	1	35	35	2	1	3	35	1	1	3	3	3	4	4	506001	1	35	0	2	1	2	4	1	5060	506006	50600101	4	1	1	156.237	0	73	419.41	427.875	320.696	430.482	350.469	408.008	384.722	384.109	390.357
792	35	4	1	50600605			1	1	1	35	35	1	1	3	35	5	3	2	2	2	2	3	506001	1	35	0	2	1	2	4	1	5060	506006	50600101	16	1	1	156.237	0	73	605.591	687.495	690.8	634.413	607.039	721.273	620.562	639.526	673.956
792	35	4	1	50600606			0	2	1	35	35	2	2	1	35	3	3	2	2	2	2	5	506001	1	35	0	2	1	2	4	1	5060	506006	50600101	17	1	1	156.237	0	73	578.799	550.084	535.14	489.993	513.261	507.633	489.973	580.15	507.087
792	35	4	1	50600607			0	2	1	35	35	2	1	3	35	3	4	1	1	2	1	1	506001	1	35	0	2	1	2	4	1	5060	506006	50600101	5	1	1	156.237	0	73	543.729	557.243	537.523	560.488	519.339	537.716	520.442	478.528	533.872
792	35	4	1	50600608			0	1	1	35	35	1	2	2	35	4	9	2	2	1	3	4	506001	1	35	0	2	1	2	4	1	5060	506006	50600101	6	1	1	156.237	0	73	580.271	608.278	555.851	549.262	606.207	563.192	589.316	550.754	622.129
792	35	4	1	50600609			1	1	1	35	35	1	1	2	35	3	4	2	2	1	3	3	506001	1	35	0	2	1	2	4	1	5060	506006	50600101	7	1	1	156.237	0	73	555.412	562.655	597.861	550.506	564.379	550.072	570.614	588.845	577.142
792	35	4	1	50600610			1	1	1	35	35	1	1	3	35	3	4	2	2	2	3	5	506001	1	35	0	2	1	2	4	1	5060	506006	50600101	18	1	1	156.237	0	73	442.555	393.926	445.977	412.246	386.385	384.299	438.876	377.533	398.119
792	35	4	1	50600611			1	1	1	35	35	1	1	3	35	3	4	2	2	2	4	2	506001	1	35	0	2	1	2	4	1	5060	506006	50600101	10	1	1	156.237	0	73	516.516	550.833	485.419	545.096	547.898	514.72	568.296	543.225	566.909
792	35	4	1	50600612			0	1	1	35	35	1	1	2	35	3	3	2	2	2	3	5	506001	1	35	0	2	1	2	4	1	5060	506006	50600101	11	1	1	156.237	0	73	536.258	512.545	515.965	525.878	559.906	489.431	542.782	569.378	552.255
792	35	4	1	50600613			0	2	1	35	35	2	1	2	35	3	9	2	2	1	2	4	506001	1	35	0	2	1	2	4	1	5060	506006	50600101	12	1	1	156.237	0	73	549.584	616.354	606.116	598.2	665.15	536.909	575.341	541.521	626.814
792	35	4	1	50600615			0	2	1	35	35	2	1	2	35	1	1	2	3	2	4	3	506001	1	35	0	2	1	2	4	1	5060	506006	50600101	8	1	1	156.237	0	73	503.744	535.206	471.771	499.414	519.045	441.52	479.521	451.255	446.91
792	35	4	1	50600616			0	2	1	35	35	2	1	3	35	2	1	2	3	2	4	3	506001	1	35	0	2	1	2	4	1	5060	506006	50600101	13	1	1	156.237	0	73	501.596	552.575	506.919	527.948	515.477	516.785	463.161	520.037	483.448
792	35	4	1	50600617			0	2	1	35	35	2	1	2	35	2	3	2	2	2	4	2	506001	1	35	0	2	1	2	4	1	5060	506006	50600101	9	1	1	156.237	0	73	640.815	629.142	652.736	591.102	620.3	566.479	607.909	636.382	629.492
792	35	4	1	50600619			0	1	1	35	35	1	1	3	35	1	1	2	3	3	3	4	506001	1	35	0	2	1	2	4	1	5060	506006	50600101	2	1	1	156.237	0	73	558.915	545.305	559.861	560.309	517.646	573.012	567.774	552.742	594.803
792	35	4	1	50600620			1	1	1	35	35	1	1	2	35	3	4	2	2	1	5	4	506001	1	35	0	2	1	2	4	1	5060	506006	50600101	14	1	1	156.237	0	73	696.409	684.95	631.687	635.295	656.118	609.215	619.046	693.135	659.966
792	35	1	3	50610401			1	1	1	35	35	1	1	3	35	3	5	2	2	1	3	3	506101	1	35	0	2	1	2	4	1	5061	506104	50610101	11	1	1	60.3152	0	29	558.799	601.869	558.21	583.372	520.106	482.952	554.328	538.682	526.56
792	35	1	3	50610402			1	2	1	35	35	2	1	3	35	2	2	2	3	3	5	5	506101	1	35	0	2	1	2	4	1	5061	506104	50610101	4	1	1	60.3152	0	29	424.425	290.822	378.742	332.833	373.408	368.356	396.805	395.497	381.263
792	35	1	3	50610403			0	1	1	35	35	1	2	2	35	2	2	2	3	3	5	3	506101	1	35	0	2	1	2	4	1	5061	506104	50610101	12	1	1	60.3152	0	29	536.039	553.853	512.294	504	474.471	503.251	461.674	487.487	580.19
792	35	1	3	50610405			0	1	1	35	35	1	2	3	35	3	3	9	2	3	9	9	506101	1	35	0	2	1	2	4	1	5061	506104	50610101	14	1	1	60.3152	0	29	495.467	508.306	511.238	476.454	487.101	503.344	510.874	517.199	515.405
792	35	1	3	50610406			1	1	1	35	35	1	3	3	35	2	3	2	2	1	3	3	506101	1	35	0	2	1	2	4	1	5061	506104	50610101	15	1	1	60.3152	0	29	524.625	639.55	585.054	597.408	601.971	590.03	646.378	597.23	642.487
792	35	1	3	50610407			1	1	1	35	35	1	1	3	35	2	3	2	2	2	2	3	506101	1	35	0	2	1	2	4	1	5061	506104	50610101	16	1	1	60.3152	0	29	509.47	487.853	506.116	479.135	544.191	454.638	486.329	545.267	456.695
792	35	1	3	50610408			0	2	1	35	35	2	1	3	35	1	1	2	3	2	3	5	506101	1	35	0	2	1	2	4	1	5061	506104	50610101	5	1	1	60.3152	0	29	429.381	381.791	422.03	363.547	417.941	388.055	397.897	491.128	396.074
792	35	1	3	50610409			0	1	1	35	35	1	1	2	35	3	5	2	2	3	3	4	506101	1	35	0	2	1	2	4	1	5061	506104	50610101	17	1	1	60.3152	0	29	522.787	513.343	536.299	574.881	593.338	507.69	526.716	574.776	567.535
792	35	1	3	50610411			0	2	1	35	35	2	1	3				9					506101	1	35	0	2	1	2	4	1	5061	506104	50610101	6	1	1	60.3152	0	29	564.483	607.229	596.518	602.479	586.725	541.793	586.461	609.582	623.225
792	35	1	3	50610412			0	2	1	35	35	2	1	3	35	5	5	1	1	1	1	1	506101	1	35	0	2	1	2	4	1	5061	506104	50610101	7	1	1	60.3152	0	29	548.821	531.168	556.221	519.965	573.276	557.584	535.047	523.872	558.803
792	35	1	3	50610413			0	2	1	35	35	2	3	2	35	4	3	2	2	1	2	3	506101	1	35	0	2	1	2	4	1	5061	506104	50610101	10	1	1	60.3152	0	29	412.834	393.048	364.654	365.83	386.285	406.792	451.886	428.946	456.36
792	35	1	3	50610414			1	1	1	35	35	1	1	3	35	1	1	2	3	2	3	6	506101	1	35	0	2	1	2	4	1	5061	506104	50610101	8	1	1	60.3152	0	29	503.267	501.528	454.821	465.593	514.687	457.04	512.64	477.867	492.436
792	35	1	3	50610415			0	1	1	35	35	1	1	3	35	3	3	2	2	1	3	4	506101	1	35	0	2	1	2	4	1	5061	506104	50610101	9	1	1	60.3152	0	29	591.112	582.356	584.734	587.641	629.245	554.946	589.374	581.621	625.654
792	35	1	3	50610416			0	2	1	35	35	2	2	3	35	1	3	2	2	1	3	2	506101	1	35	0	2	1	2	4	1	5061	506104	50610101	11	1	1	60.3152	0	29	504.788	473.476	499.848	503.646	506.659	500.722	444.157	472.138	490.267
792	35	1	3	50610417			0	2	1	35	35	2	1	3	35	3	4	2	2	2	4	2	506101	1	35	0	2	1	2	4	1	5061	506104	50610101	1	1	1	60.3152	0	29	483.865	470.883	457.175	414.365	472.959	466.487	473.017	438.415	462.044
792	35	1	3	50610418			0	1	1	35	35	1	1	3	35	4	4	2	2	2	3	4	506101	1	35	0	2	1	2	4	1	5061	506104	50610101	12	1	1	60.3152	0	29	626.381	566.13	556.214	609.249	598.082	543.826	556.88	583.782	529.687
792	35	1	3	50610419			0	2	1	35	35	2	3	2	35	1	2	3	3	2	4	4	506101	1	35	0	2	1	2	4	1	5061	506104	50610101	2	1	1	60.3152	0	29	531.888	489.641	519.46	519.693	482.569	542.381	496.52	536.092	524.065
792	35	1	3	50610420			1	1	1	35	35	1	2	3	35	5	4	2	1	2	1	4	506101	1	35	0	2	1	2	4	1	5061	506104	50610101	13	1	1	60.3152	0	29	482.63	490.807	504.655	474.422	490.213	411.94	451.031	477.314	464.552
792	35	1	3	50610422			0	2	1	35	35	2	2	3	35	1	1	2	3	2	5	6	506101	1	35	0	2	1	2	4	1	5061	506104	50610101	3	1	1	60.3152	0	29	498.059	456.826	483.977	463.675	491.185	506.739	482.536	430.609	464.54
792	35	1	3	50610423			0	2	1	35	35	2	1	2				9					506101	1	35	0	2	1	2	4	1	5061	506104	50610101	4	1	1	60.3152	0	29	403.885	417.696	447.728	454.496	403.787	363.953	453.982	377.688	417.682
792	35	1	3	50610424			0	2	1	35	35	2	2	3	35	3	3	2	2	2	2	4	506101	1	35	0	2	1	2	4	1	5061	506104	50610101	15	1	1	60.3152	0	29	521.634	600.957	592.092	529.898	586.963	493.721	525.299	543.78	559.555
792	35	1	3	50610425			1	1	1	35	35	1	3	2	35	3	3	2	2	1	4	5	506101	1	35	0	2	1	2	4	1	5061	506104	50610101	5	1	1	60.3152	0	29	598.623	590.687	582.588	575.931	572.125	562.19	584.553	574.549	551.19
792	35	1	3	50610427			1	1	1	35	35	1	1	3	35	3	4	2	2	1	3	6	506101	1	35	0	2	1	2	4	1	5061	506104	50610101	7	1	1	60.3152	0	29	488.2	557.879	555.071	591.706	549.703	493.468	496.223	505.412	520.203
792	35	1	3	50610428			0	1	1	35	35	1	2	3	35	2	3	2	2	2	5	2	506101	1	35	0	2	1	2	4	1	5061	506104	50610101	8	1	1	60.3152	0	29	437.981	409.989	412.567	480.22	460.803	460.271	391.855	404.294	467.515
792	35	1	3	50610429			0	2	1	35	35	2	2	2	35	3	4	2	2	2	2	4	506101	1	35	0	2	1	2	4	1	5061	506104	50610101	16	1	1	60.3152	0	29	527.436	467.539	512.372	489.599	493.216	484.241	474.941	445.692	455.373
792	35	1	3	50610431			0	1	1	35	35	1	1	3	35	2	3	2	3	2	5	3	506101	1	35	0	2	1	2	4	1	5061	506104	50610101	9	1	1	60.3152	0	29	579.269	599.239	597.289	617.382	597.175	599.292	544.423	613.534	531.463
792	35	1	3	50610432			0	1	1	35	35	1	1	3	35	3	3	2	2	2	3	1	506101	1	35	0	2	1	2	4	1	5061	506104	50610101	1	1	1	60.3152	0	29	577.41	579.496	581.46	534.328	552.446	566.929	601.505	548.439	619.482
792	35	1	3	50610433			1	2	1	35	35	2	1	2	35	3	4	2	2	2	2	2	506101	1	35	0	2	1	2	4	1	5061	506104	50610101	2	1	1	60.3152	0	29	513.252	526.854	527.569	567.933	503.615	494.844	522.655	562.824	559.269
792	35	1	3	50610702			0	1	1	35	35	1	1	3	35	3	3	2	2	2	4	3	506102	2	35	0	3	1	2	4	1	5061	506107	50610202	10	1	1	57.993	0	29	571.755	632.529	589.157	605.736	564.568	611.003	536.671	578.832	643.573
792	35	1	3	50610704			0	1	1	35	35	1	1	3	35	3	1	2	2	2	3	3	506102	2	35	0	3	1	2	4	1	5061	506107	50610202	4	1	1	57.993	0	29	499.681	487.35	511.101	465.126	483.496	511.052	488.201	507.612	480.968
792	35	1	3	50610706			0	2	1	35	35	2	1	9	35	3	1	2	3	2	4	3	506102	2	35	0	3	1	2	4	1	5061	506107	50610202	5	1	1	57.993	0	29	509.893	517.402	520.286	534.897	528.029	532.31	502.463	556.839	530.463
792	35	1	3	50610707			0	2	1	35	35	2	2	2	35	3	3	2	2	3	5	3	506102	2	35	0	3	1	2	4	1	5061	506107	50610202	12	1	1	57.993	0	29	446.784	466.19	471.562	461.586	435.738	480.042	457.771	487.133	464.055
792	35	1	3	50610708			1	2	1	35	35	2	1	2	35	3	3	2	3	2	5	4	506102	2	35	0	3	1	2	4	1	5061	506107	50610202	13	1	1	57.993	0	29	530.249	541.313	508.72	528.369	580.213	515.199	553.226	571.368	510.506
792	35	1	3	50610709			0	2	1	35	35	2	1	3	35	3	3	2	3	2	5	5	506102	2	35	0	3	1	2	4	1	5061	506107	50610202	14	1	1	57.993	0	29	507.635	503.713	431.477	458.216	496.69	544.54	499.194	528.964	477.086
792	35	1	3	50610710			0	2	1	35	35	2	1	2	35	3	3	2	2	2	3	4	506102	2	35	0	3	1	2	4	1	5061	506107	50610202	15	1	1	57.993	0	29	474.892	508.854	531.233	451.926	495.04	482.801	512.478	447.956	485.295
792	35	1	3	50610711			0	1	1	35	35	1	1	2	35	3	3	2	2	2	4	5	506102	2	35	0	3	1	2	4	1	5061	506107	50610202	16	1	1	57.993	0	29	492.183	476.507	521.501	474.157	538.791	475.834	516.658	529.393	516.95
792	35	1	3	50610712			0	1	1	35	35	1	1	2	35	3	3	2	2	2	3	5	506102	2	35	0	3	1	2	4	1	5061	506107	50610202	17	1	1	57.993	0	29	403.901	443.032	444.132	427.806	438.437	422.677	447.333	449.798	399.7
792	35	1	3	50610713			1	1	1	35	35	1	1	3	35	3	3	2	2	2	3	4	506102	2	35	0	3	1	2	4	1	5061	506107	50610202	18	1	1	57.993	0	29	507.156	526.021	523.975	511.027	488.61	571.97	549.682	603.372	533.447
792	35	1	3	50610714			0	1	1	35	35	1	2	1	35	2	3	2	2	3	5	2	506102	2	35	0	3	1	2	4	1	5061	506107	50610202	10	1	1	57.993	0	29	476.643	484.699	456.351	454.395	483.424	475.027	473.553	417.356	427.462
792	35	1	3	50610715			1	1	1	35	35	1	1	2	35	3	3	2	2	2	1	5	506102	2	35	0	3	1	2	4	1	5061	506107	50610202	6	1	1	57.993	0	29	567.905	559.447	609.705	591.256	564.863	600.984	567.391	627.729	547.163
792	35	1	3	50610716			0	1	1	35	35	1	1	9	35	3	4	2	2	2	3	4	506102	2	35	0	3	1	2	4	1	5061	506107	50610202	11	1	1	57.993	0	29	376.352	455.295	404.026	381.264	427.615	341.527	366.347	442.486	365.51
792	35	1	3	50610717			0	2	1	35	35	2	1	3	35	3	2	2	3	2	5	3	506102	2	35	0	3	1	2	4	1	5061	506107	50610202	7	1	1	57.993	0	29	422.222	467.724	450.076	424.82	439.683	467.769	500.838	473.53	386.795
792	35	1	3	50610718			0	1	1	35	35	1	1	2	35	3	3	2	3	2	5	5	506102	2	35	0	3	1	2	4	1	5061	506107	50610202	8	1	1	57.993	0	29	536.757	528.148	548.001	525.757	581.695	523.966	542.542	519.925	536.569
792	35	1	3	50610719			0	2	1	35	35	2	2	2	35	3	3	3	3	2	5	5	506102	2	35	0	3	1	2	4	1	5061	506107	50610202	9	1	1	57.993	0	29	498.288	483.538	516.519	475.74	481.404	462.666	481.31	484.761	503.129
792	35	1	3	50610720			0	2	1	35	35	2	2	3	35	3	3	2	3	2	5	4	506102	2	35	0	3	1	2	4	1	5061	506107	50610202	1	1	1	57.993	0	29	466.997	406.042	393.801	421.502	437.965	402.73	420.58	434.343	391.238
792	35	1	3	50610721			0	2	1	35	35	2	3	3	35	3	3	2	3	2	5	4	506102	2	35	0	3	1	2	4	1	5061	506107	50610202	2	1	1	57.993	0	29	501.054	540.959	532.737	543.737	491.837	514.563	510.866	502.015	479.803
792	35	1	3	50610722			0	1	1	35	35	1	1	1	35	3	3	2	3	2	5	5	506102	2	35	0	3	1	2	4	1	5061	506107	50610202	3	1	1	57.993	0	29	510.73	450.728	492.6	493.105	452.516	503.58	385.959	492.487	471.69
792	35	1	3	50610723			0	2	1	35	35	2	1	3	35	3	3	2	2	2	3	4	506102	2	35	0	3	1	2	4	1	5061	506107	50610202	4	1	1	57.993	0	29	436.625	543.218	479.311	469.029	502.706	468.445	505.676	475.717	439.675
792	35	1	3	50610724			1	1	1	35	35	1	2	9	35	3	3	2	2	2	1	3	506102	2	35	0	3	1	2	4	1	5061	506107	50610202	5	1	1	57.993	0	29	375.465	427.864	427.554	425.821	394.846	441.948	379.434	434.783	423.838
792	35	1	3	50610725			0	1	1	35	35	1	2	2	35	3	3	2	2	2	2	1	506102	2	35	0	3	1	2	4	1	5061	506107	50610202	6	1	1	57.993	0	29	481.649	473.253	468.511	471.53	450.367	430.914	457.059	505.8	422.415
792	35	1	3	50610726			0	1	1	35	35	1	1	3	35	3	3	2	2	2	1	3	506102	2	35	0	3	1	2	4	1	5061	506107	50610202	7	1	1	57.993	0	29	545.157	522.251	527.063	597.854	524.854	561.901	528.751	535.087	520.358
792	35	1	3	50610727			0	2	1	35	35	2	2	3	35	3	3	2	3	2	5	5	506102	2	35	0	3	1	2	4	1	5061	506107	50610202	12	1	1	57.993	0	29	430.894	437.263	463.382	442.818	438.593	462.445	403.601	468.072	448.099
792	35	1	3	50610728			0	1	1	35	35	1	1	2	35	3	3	2	3	2	5	5	506102	2	35	0	3	1	2	4	1	5061	506107	50610202	13	1	1	57.993	0	29	488.938	464.457	463.496	508.475	523.77	464.136	474.116	457.75	420.224
792	35	1	3	50610729			1	1	1	35	35	1	1	3	35	3	3	2	3	2	5	4	506102	2	35	0	3	1	2	4	1	5061	506107	50610202	14	1	1	57.993	0	29	452.167	452.062	473.628	449.163	487.064	435.591	458.983	450.47	433.582
792	35	1	3	50610730			1	2	1	35	35	2	1	2	35	3	3	3	3	2	5	4	506102	2	35	0	3	1	2	4	1	5061	506107	50610202	8	1	1	57.993	0	29	374.39	413.535	402.456	349.323	373.08	380.52	341.755	355.953	347.756
792	35	1	3	50610731			0	2	1	35	35	2	2	2	35	3	3	2	3	2	5	5	506102	2	35	0	3	1	2	4	1	5061	506107	50610202	15	1	1	57.993	0	29	508.377	496.706	495.669	515.073	538.683	434.93	484.723	480.823	487.689
792	35	1	3	50610732			0	1	1	35	35	1	1	3	35	3	3	1	1	2	1	1	506102	2	35	0	3	1	2	4	1	5061	506107	50610202	9	1	1	57.993	0	29	501.848	558.005	553.488	551.635	509.292	543.904	528.77	536.562	533.086
792	35	1	3	50610733			1	1	1	35	35	1	2	2	35	3	3	2	2	2	4	4	506102	2	35	0	3	1	2	4	1	5061	506107	50610202	16	1	1	57.993	0	29	560.403	540.386	493.313	548.904	543.661	586.382	499.842	509.618	534.446
792	35	1	3	50610734			0	2	1	35	35	2	3	3	35	3	3	2	2	2	2	5	506102	2	35	0	3	1	2	4	1	5061	506107	50610202	1	1	1	57.993	0	29	539.633	533.371	547.484	528.131	500.603	485.343	481.47	500.475	504.14
792	35	1	4	50620401			0	1	1	35	35	1	1	3	35	3	3	2	2	1	2	2	506201	1	35	0	3	1	2	4	1	5062	506204	50620101	9	1	1	139.398	0	25	559.936	531.347	529.756	514.856	536.338	530.598	542.621	564.907	592.688
792	35	1	4	50620402			0	2	1	35	35	2	2	3	35	1	1	2	3	2	3	2	506201	1	35	0	3	1	2	4	1	5062	506204	50620101	1	1	1	139.398	0	25	432.969	397.218	431.947	434.912	404.004	347.856	400.693	477.706	382.013
792	35	1	4	50620404			0	2	1	35	35	2	3	2	35	1	2	2	3	3	3	4	506201	1	35	0	3	1	2	4	1	5062	506204	50620101	2	1	1	139.398	0	25	590.955	509.765	517.527	556.286	537.693	558.969	524.489	461.645	511.249
792	35	1	4	50620405			1	2	1	35	35	2	2	1	35	3	1	2	2	2	1	3	506201	1	35	0	3	1	2	4	1	5062	506204	50620101	16	1	1	139.398	0	25	431.727	442.898	494.615	446.47	422.887	435.109	514.961	461.177	451.591
792	35	1	4	50620406			0	2	1	35	35	2	1	2	35	3	3	2	2	2	1	2	506201	1	35	0	3	1	2	4	1	5062	506204	50620101	17	1	1	139.398	0	25	470.67	470.343	505.331	455.429	476.91	470.361	469.298	417.484	457.683
792	35	1	4	50620407			0	1	1	35	35	1	2	2	35	2	2	2	3	2	5	4	506201	1	35	0	3	1	2	4	1	5062	506204	50620101	3	1	1	139.398	0	25	403.468	353.987	413.643	362.512	409.828	408.069	434.356	382.192	388.126
792	35	1	4	50620408			1	2	1	35	35	2	3	3	35	2	2	2	2	2	2	4	506201	1	35	0	3	1	2	4	1	5062	506204	50620101	18	1	1	139.398	0	25	374.36	423.101	398.205	394.196	349.468	458.374	424.734	378.472	427.398
792	35	1	4	50620409			1	1	1	35	35	1	1	9	35	5	4	2	2	1	4	9	506201	1	35	0	3	1	2	4	1	5062	506204	50620101	4	1	1	139.398	0	25	426.103	380.838	428.413	442.994	442.517	434.133	486.577	406.191	391.68
792	35	1	4	50620410			0	1	1	35	35	1	2	3	35	3	3	2	2	2	3	2	506201	1	35	0	3	1	2	4	1	5062	506204	50620101	5	1	1	139.398	0	25	549.008	568.338	608.164	582.048	581.052	558.885	530.383	539.889	557.979
792	35	1	4	50620411			0	2	1	35	35	2	1	3	35	3	3	2	2	2	4	3	506201	1	35	0	3	1	2	4	1	5062	506204	50620101	6	1	1	139.398	0	25	437.303	414.63	453.159	440.683	405.032	459.801	449.183	418.063	391.832
792	35	1	4	50620413			1	1	1	35	35	1	1	2	35	3	2	2	2	2	3	2	506201	1	35	0	3	1	2	4	1	5062	506204	50620101	8	1	1	139.398	0	25	557.547	584.197	568.044	570.01	561.86	556.038	516.953	538.252	589.058
792	35	1	4	50620414			0	2	1	35	35	2	2	3	35	9	9	9	9	9	9	9	506201	1	35	0	3	1	2	4	1	5062	506204	50620101	10	1	1	139.398	0	25	452.713	454.422	428.678	438.727	438.4	481.618	422.652	480.779	443.437
792	35	1	4	50620415			1	2	1	35	35	2	2	2	35	5	5	2	1	2	4	2	506201	1	35	0	3	1	2	4	1	5062	506204	50620101	11	1	1	139.398	0	25	340.338	251.661	307.136	328.439	330.859	380.2	377.583	326.681	306.338
792	35	1	4	50620418			0	2	1	35	35	2	1	2	35	5	5	2	1	1	1	3	506201	1	35	0	3	1	2	4	1	5062	506204	50620101	9	1	1	139.398	0	25	517.492	501.663	461.645	448.644	535.854	471.916	550.498	536.731	559.999
792	35	1	4	50620419			1	2	1	35	35	2	2	3	35	9	9	2	3	9	4	4	506201	1	35	0	3	1	2	4	1	5062	506204	50620101	14	1	1	139.398	0	25	321.549	338.52	343.872	391.509	354.242	358.506	317.247	319.614	328.238
792	35	1	4	50620421			0	1	1	35	35	1	3	3	35	3	3	2	2	3	3	5	506201	1	35	0	3	1	2	4	1	5062	506204	50620101	1	1	1	139.398	0	25	588.073	563.634	593.574	602.369	526.438	567.083	623.745	561.775	552.294
792	35	1	4	50620422			0	1	1	35	35	1	1	2	35	3	2	3	3	2	5	5	506201	1	35	0	3	1	2	4	1	5062	506204	50620101	16	1	1	139.398	0	25	541.958	545.134	535.742	556.179	505.049	507.958	540.141	498.737	510.568
792	35	1	4	50620423			1	2	1	35	35	2	3	9	35	4	2	2	2	2	3	3	506201	1	35	0	3	1	2	4	1	5062	506204	50620101	2	1	1	139.398	0	25	662.91	677.078	636.24	595.163	701.485	590.412	617.844	627.077	651.339
792	35	4	2	50630301			0	2	1	35	35	2	1	3	35	1	2	2	3	2	4	3	506301	1	35	0	3	1	2	4	1	5063	506303	50630101	6	1	1	253.53	1	61	425.579	450.993	434.1	411.849	433.144	416.396	402.381	391.722	392.146
792	35	4	2	50630302			0	2	1	35	35	2	2	3	35	1	2	3	3	3	5	5	506301	1	35	0	3	1	2	4	1	5063	506303	50630101	7	1	1	253.53	1	61	317.365	261.572	317.795	331.378	249.899	305.514	294.412	313.938	284.636
792	35	4	2	50630303			0	2	1	35	35	2	1	3	35	1	1	3	3	3	5	5	506301	1	35	0	3	1	2	4	1	5063	506303	50630101	11	1	1	253.53	1	61	394.457	418.516	367.743	334.916	357.087	314.26	416.249	346.017	375.253
792	35	4	2	50630304			0	1	1	35	35	1	2	2	35	1	2	2	3	2	3	5	506301	1	35	0	3	1	2	4	1	5063	506303	50630101	12	1	1	253.53	1	61	511.318	494.057	494.028	496.16	470.127	442.271	508.958	481.287	511.903
792	35	4	2	50630308			1	1	1	35	35	1	1	2	35	4	4	2	2	1	3	4	506301	1	35	0	3	1	2	4	1	5063	506303	50630101	1	1	1	253.53	1	61	478.021	479.524	452.152	490.607	456.208	421.54	497.294	402.659	463.14
792	35	4	2	50630309			0	2	1	35	35	2	1	2	35	3	3	2	2	1	3	1	506301	1	35	0	3	1	2	4	1	5063	506303	50630101	2	1	1	253.53	1	61	446.732	492.197	433.378	495.205	495.147	514.242	507.886	453.619	482.872
792	35	4	2	50630310			0	2	1	35	35	2	1	2	35	2	2	3	3	1	5	5	506301	1	35	0	3	1	2	4	1	5063	506303	50630101	13	1	1	253.53	1	61	493.176	509.439	445.719	469.556	471.983	458.644	490.921	474.331	466.865
792	35	4	2	50630312			0	1	1	35	35	1	1	3	35	4	3	2	2	1	4	4	506301	1	35	0	3	1	2	4	1	5063	506303	50630101	15	1	1	253.53	1	61	571.695	617.134	564.86	609.043	562.032	557.378	571.563	569.726	563.277
792	35	4	2	50630313			0	2	1	35	35	2	1	2	35	1	1	3	3	3	5	3	506301	1	35	0	3	1	2	4	1	5063	506303	50630101	16	1	1	253.53	1	61	378.536	402.51	371.261	395.292	351.444	402.097	389.143	371.357	375.935
792	35	4	2	50630314			1	1	1	35	35	1	2	3	35	1	2	2	3	2	5	3	506301	1	35	0	3	1	2	4	1	5063	506303	50630101	17	1	1	253.53	1	61	421.499	372.161	343.125	412.342	398.708	407.813	325.133	434.982	402.318
792	35	4	2	50630315			0	2	1	35	35	2	1	2	35	3	2	2	2	2	4	3	506301	1	35	0	3	1	2	4	1	5063	506303	50630101	3	1	1	253.53	1	61	378.823	385.1	395.209	385.802	399.809	427.452	409.551	385.228	384.077
792	35	4	2	50630316			0	2	1	35	35	2	1	2	35	2	1	2	3	1	3	5	506301	1	35	0	3	1	2	4	1	5063	506303	50630101	18	1	1	253.53	1	61	468.764	541.259	549.575	514.044	524.813	458.981	540.432	481.954	427.326
792	35	4	2	50630317			0	2	1	35	35	2	2	3	35	3	2	2	3	1	4	4	506301	1	35	0	3	1	2	4	1	5063	506303	50630101	4	1	1	253.53	1	61	566.651	544.462	547.653	566.418	547.724	495.691	569.342	548.411	548.884
792	35	4	2	50630319			1	1	1	35	35	1	1	1	35	2	1	3	3	3	3	5	506301	1	35	0	3	1	2	4	1	5063	506303	50630101	10	1	1	253.53	1	61	382.779	387.7	425.618	440.772	402.649	351.859	418.898	333.394	394.776
792	35	4	2	50630320			0	2	1	35	35	2	1	9	35	3	3	2	2	2	4	5	506301	1	35	0	3	1	2	4	1	5063	506303	50630101	6	1	1	253.53	1	61	431.622	455.986	440.124	426.583	448.313	420.914	443.356	433.836	438.767
792	35	4	3	50640201			0	2	1	35	35	2	1	2	35	1	1	3	3	3	5	7	506401	1	35	0	2	1	2	4	1	5064	506402	50640101	16	1	1	330.661	0	66	443.214	389.492	427.525	474.428	372.721	387.386	371.509	339.559	379.913
792	35	4	3	50640202			0	2	1	35	35	2	2	3	35	4	4	2	1	1	1	3	506401	1	35	0	2	1	2	4	1	5064	506402	50640101	17	1	1	330.661	0	66	618.287	626.537	544.003	554.247	590.306	606.391	560.632	613.583	524.498
792	35	4	3	50640203			1	1	1	35	35	1	1	3	35	3	3	2	2	1	1	5	506401	1	35	0	2	1	2	4	1	5064	506402	50640101	18	1	1	330.661	0	66	670.053	639.873	565.775	658.462	713.877	578.847	623.584	600.353	624.412
792	35	4	3	50640204			0	2	1	35	35	2	2	2	35	4	2	3	2	2	4	5	506401	1	35	0	2	1	2	4	1	5064	506402	50640101	8	1	1	330.661	0	66	476.697	444.927	444.105	510.972	462.913	468.834	458.067	442.664	431.532
792	35	4	3	50640205			0	1	1	35	35	1	1	3	35	1	2	2	3	2	5	2	506401	1	35	0	2	1	2	4	1	5064	506402	50640101	9	1	1	330.661	0	66	547.972	473.156	490.496	557.524	508.014	514.048	574.836	552.09	578.433
792	35	4	3	50640206			0	1	1	35	35	1	1	2	35	2	3	2	2	2	3	2	506401	1	35	0	2	1	2	4	1	5064	506402	50640101	1	1	1	330.661	0	66	544.273	512.398	564.153	533.112	516.122	535.789	592.094	512	503.9
792	35	4	3	50640207			1	2	1	35	35	2	2	3	35	3	2	2	2	2	1	6	506401	1	35	0	2	1	2	4	1	5064	506402	50640101	10	1	1	330.661	0	66	488.96	541.511	531.659	482.633	518.339	488.115	468.116	464.955	502.894
792	35	4	3	50640208			0	2	1	35	35	2	1	2	35	4	4	2	2	1	5	3	506401	1	35	0	2	1	2	4	1	5064	506402	50640101	2	1	1	330.661	0	66	504.056	458.692	500.112	488.519	503.037	480.853	492.829	458.919	552.092
792	35	4	3	50640209			0	1	1	35	35	1	2	2	35	3	2	2	2	2	1	2	506401	1	35	0	2	1	2	4	1	5064	506402	50640101	3	1	1	330.661	0	66	513.716	559.348	550.818	510.495	552.585	567.27	537.892	568.863	610.026
792	35	4	3	50640210			1	2	1	35	35	2	2	2	35	1	1	3	3	2	5	5	506401	1	35	0	2	1	2	4	1	5064	506402	50640101	4	1	1	330.661	0	66	242.292	249.582	330.125	308.346	317.557	280.417	323.677	375.344	385.932
792	35	4	3	50640211			0	1	1	35	35	1	1	2	35	2	2	2	2	2	3	2	506401	1	35	0	2	1	2	4	1	5064	506402	50640101	5	1	1	330.661	0	66	482.156	441.721	417.556	468.899	442.928	428.218	406.69	481.113	444.994
792	35	4	3	50640213			0	1	1	35	35	1	1	3	35	3	3	2	2	1	2	9	506401	1	35	0	2	1	2	4	1	5064	506402	50640101	6	1	1	330.661	0	66	535.215	516.716	493.313	533.23	508.162	569.457	506.461	467.77	478.242
792	35	4	3	50640214			0	1	1	35	35	1	2	3	35	1	1	2	3	3	4	2	506401	1	35	0	2	1	2	4	1	5064	506402	50640101	12	1	1	330.661	0	66	187.777	218.808	187.255	257.376	272.996	240.096	220.945	197.503	226.114
792	35	4	3	50640215			1	2	1	35	35	2	2	2	35	1	3	2	3	2	4	6	506401	1	35	0	2	1	2	4	1	5064	506402	50640101	13	1	1	330.661	0	66	410.098	373.105	372.442	336.344	344.325	462.717	387.628	386.765	409.849
792	35	4	3	50640216			0	1	1	35	35	1	3	2	35			9					506401	1	35	0	2	1	2	4	1	5064	506402	50640101	14	1	1	330.661	0	66	463.982	414.174	473.017	408.651	449.517	440.189	395.166	452.292	433.124
792	35	4	3	50640217			1	2	1	35	35	2	1	2	35	3	3	2	2	1	3	1	506401	1	35	0	2	1	2	4	1	5064	506402	50640101	7	1	1	330.661	0	66	538.219	483.641	528.082	486.757	476.624	415.441	446.717	494.834	484.504
792	35	4	3	50640218			0	1	1	35	35	1	2	3	35	2	2	2	2	2	2	7	506401	1	35	0	2	1	2	4	1	5064	506402	50640101	15	1	1	330.661	0	66	628.07	615.189	548.659	626.495	601.086	594.372	613.488	620.233	552.047
792	35	1	4	50650201			1	1	1	35	35	1	1	3	35	4	4	1	1	2	1	1	506501	1	35	0	2	1	2	4	1	5065	506502	50650101	13	1	1	56.3643	0	37	635.364	659.273	706.488	657.307	654.869	774.707	683.252	718.899	698.847
792	35	1	4	50650202			1	1	1	35	35	1	1	3	35	3	4	1	1	2	2	1	506501	1	35	0	2	1	2	4	1	5065	506502	50650101	14	1	1	56.3643	0	37	549.723	646.18	608.308	595.382	558.408	672.771	657.824	676.705	582.942
792	35	1	4	50650203			0	1	1	35	35	1	1	3	35	3	3	2	2	2	3	2	506501	1	35	0	2	1	2	4	1	5065	506502	50650101	8	1	1	56.3643	0	37	527.927	499.595	522.57	530.976	507.98	514.979	531.049	551.916	492.539
792	35	1	4	50650204			1	2	1	35	35	2	1	3	35	3	5	2	2	1	3	4	506501	1	35	0	2	1	2	4	1	5065	506502	50650101	15	1	1	56.3643	0	37	627.975	592.872	557.398	645.694	619.64	609.804	672.7	619.498	596.718
792	35	1	4	50650205			0	2	1	35	35	2	1	3	35	4	5	1	1	1	1	1	506501	1	35	0	2	1	2	4	1	5065	506502	50650101	16	1	1	56.3643	0	37	604.514	511.996	563.883	638.119	550.83	572.68	591.54	563.704	524.465
792	35	1	4	50650206			0	2	1	35	35	2	1	3	35	4	4	1	1	1	1	1	506501	1	35	0	2	1	2	4	1	5065	506502	50650101	17	1	1	56.3643	0	37	656.401	634.435	669.244	671.512	595.158	632.332	608.916	691.834	655.814
792	35	1	4	50650207			1	1	1	35	35	1	1	3	35	3	4	2	2	1	1	3	506501	1	35	0	2	1	2	4	1	5065	506502	50650101	9	1	1	56.3643	0	37	661.603	713.458	703.469	665.332	737.819	722.731	588.617	687.586	669.098
792	35	1	4	50650208			1	1	1	35	35	1	1	3	35	3	3	2	2	2	3	3	506501	1	35	0	2	1	2	4	1	5065	506502	50650101	18	1	1	56.3643	0	37	586.723	549.732	509.051	546.649	625.692	462.899	588.671	484.32	543.229
792	35	1	4	50650209			0	2	1	35	35	2	1	3	35	4	3	2	2	3	4	3	506501	1	35	0	2	1	2	4	1	5065	506502	50650101	1	1	1	56.3643	0	37	604.825	654.143	682.883	625.634	561.587	577.861	622.799	642.035	643.484
792	35	1	4	50650210			0	2	1	35	35	2	1	3	35	2	4	2	2	1	3	4	506501	1	35	0	2	1	2	4	1	5065	506502	50650101	2	1	1	56.3643	0	37	576.963	570.031	525.991	581.595	567.189	651.968	576.322	553.596	589.619
792	35	1	4	50650211			0	1	1	35	35	1	2	3	35	5	5	2	1	1	1	3	506501	1	35	0	2	1	2	4	1	5065	506502	50650101	3	1	1	56.3643	0	37	591.071	608.509	573.181	609.702	541.867	535.278	560.98	566.593	569.267
792	35	1	4	50650212			0	1	1	35	35	1	2	3	35	2	1	2	2	2	1	3	506501	1	35	0	2	1	2	4	1	5065	506502	50650101	4	1	1	56.3643	0	37	576.265	508.99	561.055	529.146	529.425	522.107	554.976	497.582	495.328
792	35	1	4	50650213			0	1	1	35	35	1	1	3	35	4	5	1	1	1	1	1	506501	1	35	0	2	1	2	4	1	5065	506502	50650101	10	1	1	56.3643	0	37	635.12	658.793	648.716	554.374	572.559	605.75	585.403	656.126	596.54
792	35	1	4	50650214			0	1	1	35	35	1	2	3	35	4	3	1	1	2	1	1	506501	1	35	0	2	1	2	4	1	5065	506502	50650101	5	1	1	56.3643	0	37	642.702	619.552	670.043	707.469	680.678	694.498	702.592	614.715	612.826
792	35	1	4	50650215			0	2	1	35	35	2	1	2	35	3	3	2	2	2	2	3	506501	1	35	0	2	1	2	4	1	5065	506502	50650101	6	1	1	56.3643	0	37	567.346	558.516	578.321	634.189	562.269	578.306	592.983	578.846	567.235
792	35	1	4	50650216			1	1	1	35	35	1	2	2	35	4	4	2	2	1	2	4	506501	1	35	0	2	1	2	4	1	5065	506502	50650101	7	1	1	56.3643	0	37	638.64	639.624	642.406	635.227	605.936	572.835	623.107	592.697	606.893
792	35	1	4	50650217			0	1	1	35	35	1	1	3				9					506501	1	35	0	2	1	2	4	1	5065	506502	50650101	8	1	1	56.3643	0	37	553.538	550.762	551.777	515.339	492.301	521.233	501.023	571.691	526.413
792	35	1	4	50650218			0	2	1	35	35	2	1	2	35	3	4	2	2	2	1	3	506501	1	35	0	2	1	2	4	1	5065	506502	50650101	9	1	1	56.3643	0	37	586.428	594.463	601.688	580.199	551.292	604.387	590.142	584.908	614.582
792	35	1	4	50650219			1	1	1	35	35	1	2	2	35	3	3	2	2	2	4	4	506501	1	35	0	2	1	2	4	1	5065	506502	50650101	11	1	1	56.3643	0	37	683.506	646.75	682.356	645.551	681.393	659.498	686.634	626.768	760.601
792	35	1	4	50650220			1	1	1	35	35	1	1	1				9					506501	1	35	0	2	1	2	4	1	5065	506502	50650101	1	1	1	56.3643	0	37	554.309	545.693	537.995	577.855	542.449	561.533	492.241	560.332	572.088
792	35	1	4	50650221			0	2	1	35	35	2	1	3	35	3	4	1	1	1	1	1	506501	1	35	0	2	1	2	4	1	5065	506502	50650101	12	1	1	56.3643	0	37	658.665	608.419	684.023	629.22	680.603	650.007	615.174	595.733	637.321
792	35	1	4	50650222			1	2	1	35	35	2	2	2	35	4	4	2	1	1	1	2	506501	1	35	0	2	1	2	4	1	5065	506502	50650101	2	1	1	56.3643	0	37	623.973	569.623	643.926	599.497	573.466	545.357	555.799	644.172	618.655
792	35	1	4	50650223			0	2	1	35	35	2	1	2	35	5	5	1	1	1	1	1	506501	1	35	0	2	1	2	4	1	5065	506502	50650101	13	1	1	56.3643	0	37	597.4	598.987	580.723	534.634	570.414	515.316	567.838	511.754	636.506
792	35	1	4	50650224			0	1	1	35	35	1	1	3	35	4	4	1	1	1	1	1	506501	1	35	0	2	1	2	4	1	5065	506502	50650101	14	1	1	56.3643	0	37	623.882	654.798	551.482	604.397	598.957	659.412	561.446	582.086	666.021
792	35	1	4	50650225			0	1	1	35	35	1	1	3	35	5	5	1	1	2	1	3	506501	1	35	0	2	1	2	4	1	5065	506502	50650101	15	1	1	56.3643	0	37	592.431	676.327	644.894	652.907	662.393	632.52	672.194	599.894	718.9
792	35	1	4	50650226			0	1	1	35	35	1	2	3	35	2	2	2	2	2	3	3	506501	1	35	0	2	1	2	4	1	5065	506502	50650101	16	1	1	56.3643	0	37	585.128	617.984	593.298	598.978	620.699	608.381	581.817	644.246	522.072
792	35	1	4	50650227			0	1	1	35	35	1	1	3	35	3	3	2	1	1	1	1	506501	1	35	0	2	1	2	4	1	5065	506502	50650101	3	1	1	56.3643	0	37	698.174	588.865	657.109	674.113	686.978	663.019	631.733	694.878	648.041
792	35	1	4	50650228			1	1	1	35	35	1	2	3	35	4	5	2	1	2	1	3	506501	1	35	0	2	1	2	4	1	5065	506502	50650101	17	1	1	56.3643	0	37	615.194	576.417	670.248	596.225	595.357	583.253	665.74	617.083	594.832
792	35	1	4	50650229			1	2	1	35	35	2	1	3	35	3	3	2	2	1	1	3	506501	1	35	0	2	1	2	4	1	5065	506502	50650101	4	1	1	56.3643	0	37	663.952	675.41	631.565	678.551	670.477	731.389	665.944	675.585	697.97
792	35	1	4	50650230			0	2	1	35	35	2	2	3	35	3	3	2	2	2	3	3	506501	1	35	0	2	1	2	4	1	5065	506502	50650101	18	1	1	56.3643	0	37	549.315	548.562	600.58	537.119	616.389	562.651	572.777	574.655	582.345
792	35	1	4	50650231			0	2	1	35	35	2	1	3	35	3	3	2	2	1	1	3	506501	1	35	0	2	1	2	4	1	5065	506502	50650101	10	1	1	56.3643	0	37	573.662	595.655	574.088	626.174	615.243	545.971	559.817	557.657	609.833
792	35	1	4	50650232			0	1	1	35	35	1	1	3	35	2	4	2	2	3	2	2	506501	1	35	0	2	1	2	4	1	5065	506502	50650101	5	1	1	56.3643	0	37	568.681	598.486	593.782	585.306	572.44	587.549	592.434	578.529	581.453
792	35	1	4	50650234			0	1	1	35	35	1	2	3	35	4	4	1	1	1	1	1	506501	1	35	0	2	1	2	4	1	5065	506502	50650101	7	1	1	56.3643	0	37	624.81	612.026	710.788	724.015	653.972	618.697	682.259	669.603	676.979
792	35	1	4	50650235			0	2	1	35	35	2	1	3	35	1	2	2	3	3	2	4	506501	1	35	0	2	1	2	4	1	5065	506502	50650101	11	1	1	56.3643	0	37	569.801	564.012	518.614	583.879	584.329	551.192	500.935	516.615	600.613
792	35	1	4	50650236			0	2	1	35	35	2	1	3	35	3	5	2	2	2	3	2	506501	1	35	0	2	1	2	4	1	5065	506502	50650101	12	1	1	56.3643	0	37	511.713	520.611	515.973	481.325	526.288	489.198	499.592	505.893	527.474
792	35	1	4	50650237			0	1	1	35	35	1	2	3	35	3	5	1	1	2	1	1	506501	1	35	0	2	1	2	4	1	5065	506502	50650101	8	1	1	56.3643	0	37	656.581	699.978	606.186	644.947	620.004	675.043	679.524	651.098	625.597
792	35	1	4	50650601			1	1	1	35	35	1	1	1	35	4	4	2	2	3	3	2	506502	2	35	0	3	1	2	4	1	5065	506506	50650202	9	1	1	54.8409	0	37	565.053	594.176	565.216	542.627	611.176	553.056	607.719	571.924	620.806
792	35	1	4	50650602			0	1	1	35	35	1	1	3	35	2	2	2	2	2	2	3	506502	2	35	0	3	1	2	4	1	5065	506506	50650202	13	1	1	54.8409	0	37	634.199	656.424	665.464	679.955	620.241	544.441	630.373	632.987	614.756
792	35	1	4	50650603			0	2	1	35	35	2	1	1	35	3	2	3	2	2	5	2	506502	2	35	0	3	1	2	4	1	5065	506506	50650202	14	1	1	54.8409	0	37	441.31	418.775	409.419	435.666	438.67	447.32	429.289	417.13	445.207
792	35	1	4	50650604			0	2	1	35	35	2	1	3	35	1	5	2	2	3	5	2	506502	2	35	0	3	1	2	4	1	5065	506506	50650202	1	1	1	54.8409	0	37	514.375	504.668	499.792	509.884	493.15	467.221	473.966	492.875	505.006
792	35	1	4	50650605			0	2	1	35	35	2	1	3	35	3	2	2	2	2	2	1	506502	2	35	0	3	1	2	4	1	5065	506506	50650202	15	1	1	54.8409	0	37	646.104	595.794	575.156	585.045	629.259	590.877	575.041	545.115	532.202
792	35	1	4	50650606			0	2	1	35	35	2	2	2	35	3	3	2	2	2	1	3	506502	2	35	0	3	1	2	4	1	5065	506506	50650202	16	1	1	54.8409	0	37	576.117	666.06	645.341	630.897	604.846	534.024	602.245	580.092	584.57
792	35	1	4	50650607			0	1	1	35	35	1	1	2	35	3	2	2	3	2	5	4	506502	2	35	0	3	1	2	4	1	5065	506506	50650202	2	1	1	54.8409	0	37	549.799	615.04	606.195	618.242	649.893	607.363	540.499	599.358	653.688
792	35	1	4	50650608			1	2	1	35	35	2	1	3	35	5	5	2	1	1	3	7	506502	2	35	0	3	1	2	4	1	5065	506506	50650202	17	1	1	54.8409	0	37	692.939	580.782	611.081	626.489	610.534	627.556	645.265	632.961	679.454
792	35	1	4	50650609			0	2	1	35	35	2	1	2	35	5	4	2	1	2	1	1	506502	2	35	0	3	1	2	4	1	5065	506506	50650202	18	1	1	54.8409	0	37	516.417	483.287	547.881	549.713	507.913	526.828	469.36	518.728	550.743
792	35	1	4	50650610			0	1	1	35	35	1	2	3	35	5	5	1	1	1	1	1	506502	2	35	0	3	1	2	4	1	5065	506506	50650202	10	1	1	54.8409	0	37	561.275	593.736	670.982	566.86	547.18	668.463	636.25	582.49	615.652
792	35	1	4	50650611			1	2	1	35	35	2	2	3	35	3	3	2	2	1	1	3	506502	2	35	0	3	1	2	4	1	5065	506506	50650202	3	1	1	54.8409	0	37	524.099	491.456	511.603	496.092	506.205	468.083	579.707	489.324	553.157
792	35	1	4	50650613			0	2	1	35	35	2	2	3	35	3	3	2	2	1	3	3	506502	2	35	0	3	1	2	4	1	5065	506506	50650202	4	1	1	54.8409	0	37	613.796	599.519	606.352	559.792	580.272	595.196	587.947	628.452	620.382
792	35	1	4	50650614			0	2	1	35	35	2	1	3	35	3	2	2	3	2	5	5	506502	2	35	0	3	1	2	4	1	5065	506506	50650202	5	1	1	54.8409	0	37	462.17	489.556	426.076	417.691	469.465	419.89	416.358	478.694	405.152
792	35	1	4	50650615			0	1	1	35	35	1	1	3	35	3	3	2	3	1	5	6	506502	2	35	0	3	1	2	4	1	5065	506506	50650202	12	1	1	54.8409	0	37	632.116	647.728	677.405	647.294	653.003	610.809	648.162	608.072	620.684
792	35	1	4	50650616			0	2	1	35	35	2	2	3	35	3	3	2	2	3	2	3	506502	2	35	0	3	1	2	4	1	5065	506506	50650202	13	1	1	54.8409	0	37	638.419	586.728	623.712	644.884	689.249	587.383	702.094	738.808	584.142
792	35	1	4	50650617			0	1	1	35	35	1	1	3	35	3	3	2	2	2	4	1	506502	2	35	0	3	1	2	4	1	5065	506506	50650202	6	1	1	54.8409	0	37	450.578	417.484	429.645	415.147	455.589	473.156	421.158	426.384	451.623
792	35	1	4	50650618			1	1	1	35	35	1	1	3	35	2	2	2	2	1	1	4	506502	2	35	0	3	1	2	4	1	5065	506506	50650202	14	1	1	54.8409	0	37	403.783	384.088	427.856	408.241	408.863	441.607	434.695	458.889	401.828
792	35	1	4	50650619			0	2	1	35	35	2	2	3	35	4	5	2	2	1	3	3	506502	2	35	0	3	1	2	4	1	5065	506506	50650202	7	1	1	54.8409	0	37	558.924	533.06	544.35	546.86	571.055	608.687	548.007	574.309	562.789
792	35	1	4	50650620			0	2	1	35	35	2	1	3	35	4	4	2	2	1	3	4	506502	2	35	0	3	1	2	4	1	5065	506506	50650202	8	1	1	54.8409	0	37	591.933	516.038	535.758	518.316	538.936	517.542	513.638	542.953	499.424
792	35	1	4	50650621			0	1	1	35	35	1	2	9	35	1	2	2	2	1	3	2	506502	2	35	0	3	1	2	4	1	5065	506506	50650202	9	1	1	54.8409	0	37	590.919	611.689	585.867	609.891	639.554	696.676	588.436	603.439	672.075
792	35	1	4	50650622			0	2	1	35	35	2	1	3	35	3	3	1	1	1	1	1	506502	2	35	0	3	1	2	4	1	5065	506506	50650202	1	1	1	54.8409	0	37	644.902	623.439	603.636	620.252	570.792	633.683	600.39	600.732	616.238
792	35	1	4	50650624			0	1	1	35	35	1	2	3	35	9	9	9	9	9	9	9	506502	2	35	0	3	1	2	4	1	5065	506506	50650202	2	1	1	54.8409	0	37	384.757	378.77	445.752	397.953	387.374	367.612	340.192	382.274	408.73
792	35	1	4	50650625			0	2	1	35	35	2	3	2	35	3	3	2	2	2	4	9	506502	2	35	0	3	1	2	4	1	5065	506506	50650202	16	1	1	54.8409	0	37	310.332	300.583	356.669	318.148	320.234	321.964	311.192	369.842	359.576
792	35	1	4	50650626			0	2	1	35	35	2	1	2	35	3	4	2	2	3	1	3	506502	2	35	0	3	1	2	4	1	5065	506506	50650202	3	1	1	54.8409	0	37	550.776	523.257	529.81	566.426	529.78	503.415	510.592	484.316	512.689
792	35	1	4	50650627			0	1	1	35	35	1	1	2	35	5	4	2	1	1	2	3	506502	2	35	0	3	1	2	4	1	5065	506506	50650202	17	1	1	54.8409	0	37	623.424	552.66	666.965	571.641	607.607	583.463	547.03	671.377	602.982
792	35	1	4	50650628			1	2	1	35	35	2	1	3	35	4	3	2	2	2	2	3	506502	2	35	0	3	1	2	4	1	5065	506506	50650202	4	1	1	54.8409	0	37	582.379	581.293	567.065	568.682	591.776	574.09	599.11	591.314	582.859
792	35	1	4	50650629			0	1	1	35	35	1	1	3	35	3	4	2	2	1	2	3	506502	2	35	0	3	1	2	4	1	5065	506506	50650202	5	1	1	54.8409	0	37	551.118	618.995	569.754	553.994	552.427	573.45	573.054	557.836	592.769
792	35	1	4	50650630			0	2	1	35	35	2	2	2	35	2	4	2	3	2	5	5	506502	2	35	0	3	1	2	4	1	5065	506506	50650202	18	1	1	54.8409	0	37	574.047	593.638	568.449	531.241	585.732	480.369	588.689	504.96	520.051
792	35	1	4	50650631			1	1	1	35	35	1	2	3	35	1	3	2	2	2	2	2	506502	2	35	0	3	1	2	4	1	5065	506506	50650202	6	1	1	54.8409	0	37	593.026	560.705	567.083	562.668	557.212	547.492	570.468	510.91	564.604
792	35	1	4	50650632			0	1	1	35	35	1	1	3	35	5	5	1	1	1	3	1	506502	2	35	0	3	1	2	4	1	5065	506506	50650202	10	1	1	54.8409	0	37	551.6	546.146	629.928	573.389	501.307	550.308	590.303	564.76	635.265
792	35	1	4	50650633			0	2	1	35	35	2	2	3	35	5	4	2	2	1	3	3	506502	2	35	0	3	1	2	4	1	5065	506506	50650202	7	1	1	54.8409	0	37	549.079	516.012	528.392	519.605	519.047	466.391	505.886	458.625	536.788
792	35	1	4	50650634			0	1	1	35	35	1	2	3	35	2	3	2	2	2	1	3	506502	2	35	0	3	1	2	4	1	5065	506506	50650202	11	1	1	54.8409	0	37	600.066	619.689	598.188	650.337	558.389	585.634	618.706	612.479	614.093
792	35	1	4	50650635			1	1	1	35	35	1	1	1	35	3	3	2	2	2	1	3	506502	2	35	0	3	1	2	4	1	5065	506506	50650202	12	1	1	54.8409	0	37	438.883	466.033	467.007	483.764	411.543	459.574	484.15	460.92	458.129
792	35	1	4	50650636			1	2	1	35	35	2	2	2	35	2	3	2	2	1	3	2	506502	2	35	0	3	1	2	4	1	5065	506506	50650202	8	1	1	54.8409	0	37	484.44	414.441	475.691	464.129	473.467	467.655	473.649	412.749	460.202
792	35	1	4	50650637			0	2	1	35	35	2	1	3	35	1	2	2	2	2	2	3	506502	2	35	0	3	1	2	4	1	5065	506506	50650202	9	1	1	54.8409	0	37	450.33	475.612	503.007	509.35	461.322	469.484	458.111	417.578	495.156
792	35	4	1	50660201			1	1	1	35	35	1	1	3	35	2	1	2	3	1	9	4	506601	1	35	0	2	1	2	4	1	5066	506602	50660101	2	1	1	288.436	1	40	420.354	341.865	398.673	372.905	414.03	350.22	406.634	417.543	387.114
792	35	4	1	50660203			0	2	1	35	35	2	1	2	35	1	2	3	3	2	5	3	506601	1	35	0	2	1	2	4	1	5066	506602	50660101	3	1	1	288.436	1	40	375.763	408.083	349.227	343.716	353.843	381.68	359.977	351.361	352.697
792	35	4	1	50660204			0	1	1	35	35	1	1	3	35	3	2	2	2	1	4	2	506601	1	35	0	2	1	2	4	1	5066	506602	50660101	12	1	1	288.436	1	40	466.227	430.5	439.182	443.351	425.267	459.278	419.085	454.943	413.975
792	35	4	1	50660206			0	2	1	35	35	2	1	3	35	2	1	2	3	2	5	2	506601	1	35	0	2	1	2	4	1	5066	506602	50660101	13	1	1	288.436	1	40	436.175	481.848	444.748	474.649	450.003	492.248	483.044	452.964	506.059
792	35	4	1	50660207			0	2	1	35	35	2	2	2	35	4	4	2	2	2	3	6	506601	1	35	0	2	1	2	4	1	5066	506602	50660101	14	1	1	288.436	1	40	447.798	475.852	418.66	428.298	437.104	450.844	447.175	437.242	461.422
792	35	4	1	50660208			1	2	1	35	35	2	1	2	35	5	3	2	2	2	5	6	506601	1	35	0	2	1	2	4	1	5066	506602	50660101	15	1	1	288.436	1	40	479.3	480.143	419.004	454.446	484.116	428.459	445.168	487.426	449.639
792	35	4	1	50660209			0	1	1	35	35	1	1	1	35	3	3	2	2	2	4	3	506601	1	35	0	2	1	2	4	1	5066	506602	50660101	5	1	1	288.436	1	40	537.03	529.494	526.961	545.701	516.64	529.7	502.562	514.209	555.239
792	35	4	1	50660210			1	2	1	35	35	2	2	2	35	1	2	2	3	3	5	3	506601	1	35	0	2	1	2	4	1	5066	506602	50660101	6	1	1	288.436	1	40	438.834	452.218	474.671	436.432	499.993	492.233	404.13	401.873	420.082
792	35	4	1	50660211			0	1	1	35	35	1	1	3	35	3	3	2	2	1	4	6	506601	1	35	0	2	1	2	4	1	5066	506602	50660101	16	1	1	288.436	1	40	389.794	420.543	468.329	429.287	400.34	462.577	475.414	446.721	433.033
792	35	4	1	50660212			1	2	1	35	35	2	1	2	35	1	3	2	2	2	2	4	506601	1	35	0	2	1	2	4	1	5066	506602	50660101	17	1	1	288.436	1	40	561.582	547.714	584.229	595.723	525.728	581.744	518.509	579.3	528.091
792	35	4	1	50660214			0	2	1	35	35	2	1	3	35	2	2	2	2	2	3	3	506601	1	35	0	2	1	2	4	1	5066	506602	50660101	10	1	1	288.436	1	40	527.771	514.164	516.152	566.072	544.651	439.678	483.627	527.32	539.855
792	35	4	1	50660215			0	2	1	35	35	2	1	3	35	3	3	2	2	2	3	1	506601	1	35	0	2	1	2	4	1	5066	506602	50660101	7	1	1	288.436	1	40	492.39	558.101	514.355	552.549	489.962	469.318	502.15	540.316	500.216
792	35	4	1	50660216			0	2	1	35	35	2	1	3	35	3	4	2	2	2	4	4	506601	1	35	0	2	1	2	4	1	5066	506602	50660101	8	1	1	288.436	1	40	434.211	451.335	439.6	425.918	394.907	378.668	409.856	447.984	439.877
792	35	4	1	50660219			0	2	1	35	35	2	1	1	35	3	2	3	3	1	4	5	506601	1	35	0	2	1	2	4	1	5066	506602	50660101	9	1	1	288.436	1	40	461.468	539.489	538.136	502.364	506.297	483.271	463.326	543.926	471.231
792	35	4	1	50660220			0	2	1	35	35	2	1	2	35	1	1	2	3	1	3	2	506601	1	35	0	2	1	2	4	1	5066	506602	50660101	1	1	1	288.436	1	40	493.278	483.263	477.951	492.958	523.363	490.013	477.844	489.53	482.539
792	35	4	1	50660221			0	2	1	35	35	2	1	3	35	1	2	2	3	2	5	3	506601	1	35	0	2	1	2	4	1	5066	506602	50660101	2	1	1	288.436	1	40	367.023	376.262	403.147	371.777	410.332	437.111	430.446	379.512	388.162
792	35	4	1	50660222			0	2	1	35	35	2	1	3	35	2	3	2	3	2	4	4	506601	1	35	0	2	1	2	4	1	5066	506602	50660101	3	1	1	288.436	1	40	455.631	515.54	426.407	470.894	467.317	501.031	404.383	546.418	489.007
792	35	4	1	50660223			1	2	1	35	35	2	1	3	35	2	4	2	2	2	3	1	506601	1	35	0	2	1	2	4	1	5066	506602	50660101	12	1	1	288.436	1	40	566.456	570.883	514.177	537.718	529.599	508.101	612.737	545.823	522.672
792	35	4	1	50660224			1	2	1	35	35	2	1	2	35	3	5	2	2	1	2	3	506601	1	35	0	2	1	2	4	1	5066	506602	50660101	13	1	1	288.436	1	40	581.014	580.465	577.692	562.648	577.636	537.563	566.749	525.701	552.237
792	35	4	1	50660226			1	1	1	35	35	1	1	3	35	3	2	2	2	2	4	2	506601	1	35	0	2	1	2	4	1	5066	506602	50660101	4	1	1	288.436	1	40	448.724	421.561	458.849	460.373	462.912	437.514	490.337	481.913	448.607
792	35	4	1	50660227			0	2	1	35	35	2	1	2	35	2	3	2	3	1	5	5	506601	1	35	0	2	1	2	4	1	5066	506602	50660101	5	1	1	288.436	1	40	527.701	547.674	546.176	524.168	538.174	543.337	542.363	552.128	550.376
792	35	4	1	50660228			0	1	1	35	35	1	1	2	35	3	3	3	3	2	5	4	506601	1	35	0	2	1	2	4	1	5066	506602	50660101	15	1	1	288.436	1	40	596.912	552.065	588.852	590.527	516.024	510.653	597.081	504.124	573.913
792	35	4	1	50660229			0	2	1	35	35	2	1	2	35	2	2	2	3	2	4	6	506601	1	35	0	2	1	2	4	1	5066	506602	50660101	6	1	1	288.436	1	40	494.632	487.595	462.615	483.038	474.536	512.226	497.524	504.257	503.843
792	35	1	4	50670201			0	2	1	35	35	2	2	3	35	3	4	2	2	2	1	3	506701	1	35	0	3	1	2	4	1	5067	506702	50670101	4	1	1	191.029	0	90	618.191	600.321	612.81	627.999	609.407	641.346	589.714	620.781	562.599
792	35	1	4	50670202			1	2	1	35	35	2	2	3	35	2	2	9	2	2	9	9	506701	1	35	0	3	1	2	4	1	5067	506702	50670101	15	1	1	191.029	0	90	509.07	493.593	563.245	480.388	531.645	524.443	586.504	498.26	497.037
[truncated: 4,033 more rows]
[truncated: 24 more columns]
